# Supplementary material
Source: publisher figshare collection journal article supplement (https://acs.figshare.com/ndownloader/files/10725754)
Supplement: Supplementary file 1 [file 10725754]

 
data_sk067Cu
 
_audit_creation_method            'SHELXL-2014/7'
_shelx_SHELXL_version_number      '2014/7'
_chemical_name_systematic         ?
_chemical_name_common             ?
_chemical_melting_point           ?
_chemical_formula_moiety          ?
_chemical_formula_sum
 'C70 H52' 
_chemical_formula_weight          893.11

loop_
 _atom_type_symbol
 _atom_type_description
 _atom_type_scat_dispersion_real
 _atom_type_scat_dispersion_imag
 _atom_type_scat_source
 'C'  'C'   0.0181   0.0091
 'International Tables Vol C Tables 4.2.6.8 and 6.1.1.4'
 'H'  'H'   0.0000   0.0000
 'International Tables Vol C Tables 4.2.6.8 and 6.1.1.4'
 
_space_group_crystal_system       triclinic
_space_group_IT_number            2
_space_group_name_H-M_alt         'P -1'
_space_group_name_Hall            '-P 1'
 
_shelx_space_group_comment
;
The symmetry employed for this shelxl refinement is uniquely defined
by the following loop, which should always be used as a source of
symmetry information in preference to the above space-group names.
They are only intended as comments.
;
 
loop_
 _space_group_symop_operation_xyz
 'x, y, z'
 '-x, -y, -z'
 
_cell_length_a                    10.338(4)
_cell_length_b                    11.016(6)
_cell_length_c                    22.351(9)
_cell_angle_alpha                 88.20(4)
_cell_angle_beta                  77.272(17)
_cell_angle_gamma                 86.40(3)
_cell_volume                      2477.6(19)
_cell_formula_units_Z             2
_cell_measurement_temperature     123(2)
_cell_measurement_reflns_used     1716
_cell_measurement_theta_min       22.2
_cell_measurement_theta_max       68.2
 
_exptl_crystal_description        'Prism'
_exptl_crystal_colour             'Colorless'
_exptl_crystal_density_meas       ?
_exptl_crystal_density_method     ?
_exptl_crystal_density_diffrn     1.197          
_exptl_crystal_F_000              944
_exptl_transmission_factor_min    ?
_exptl_transmission_factor_max    ?
_exptl_crystal_size_max           0.200
_exptl_crystal_size_mid           0.110
_exptl_crystal_size_min           0.030
_exptl_absorpt_coefficient_mu     0.511
_shelx_estimated_absorpt_T_min    0.905
_shelx_estimated_absorpt_T_max    0.985
_exptl_absorpt_correction_type    ?
_exptl_absorpt_correction_T_min   ?
_exptl_absorpt_correction_T_max   ?
_exptl_absorpt_process_details    ?
_exptl_absorpt_special_details    ?
_diffrn_ambient_temperature       123(2)
_diffrn_radiation_wavelength      1.54187
_diffrn_radiation_type            CuK\a
_diffrn_source                    ?
_diffrn_measurement_device_type   'Rigaku Pilatus 200K'
_diffrn_measurement_method        ?
_diffrn_detector_area_resol_mean  ?
_diffrn_reflns_number             31478
_diffrn_reflns_av_unetI/netI      0.0705
_diffrn_reflns_av_R_equivalents   0.0870
_diffrn_reflns_limit_h_min        -12
_diffrn_reflns_limit_h_max        12
_diffrn_reflns_limit_k_min        -13
_diffrn_reflns_limit_k_max        12
_diffrn_reflns_limit_l_min        -26
_diffrn_reflns_limit_l_max        26
_diffrn_reflns_theta_min          6.091
_diffrn_reflns_theta_max          67.498
_diffrn_reflns_theta_full         67.498
_diffrn_measured_fraction_theta_max   0.976
_diffrn_measured_fraction_theta_full  0.976
_diffrn_reflns_Laue_measured_fraction_max    0.976
_diffrn_reflns_Laue_measured_fraction_full   0.976
_diffrn_reflns_point_group_measured_fraction_max   0.976
_diffrn_reflns_point_group_measured_fraction_full  0.976
_reflns_number_total              8720
_reflns_number_gt                 4466
_reflns_threshold_expression      'I > 2\s(I)'
_reflns_Friedel_coverage          0.000
_reflns_Friedel_fraction_max      .
_reflns_Friedel_fraction_full     .
 
_reflns_special_details
;
 Reflections were merged by SHELXL according to the crystal
 class for the calculation of statistics and refinement.
 
 _reflns_Friedel_fraction is defined as the number of unique
 Friedel pairs measured divided by the number that would be
 possible theoretically, ignoring centric projections and
 systematic absences.
;
 
_computing_data_collection        ?
_computing_cell_refinement        ?
_computing_data_reduction         ?
_computing_structure_solution     ?
_computing_structure_refinement 'SHELXL-2014/7 (Sheldrick, 2014)'
_computing_molecular_graphics     ?
_computing_publication_material   ?
_refine_special_details           ?
_refine_ls_structure_factor_coef  Fsqd
_refine_ls_matrix_type            full
_refine_ls_weighting_scheme       calc
_refine_ls_weighting_details
'w=1/[\s^2^(Fo^2^)+(0.1746P)^2^+1.4764P] where P=(Fo^2^+2Fc^2^)/3'
_atom_sites_solution_primary      ?
_atom_sites_solution_secondary    ?
_atom_sites_solution_hydrogens    geom
_refine_ls_hydrogen_treatment     constr
_refine_ls_extinction_method      none
_refine_ls_extinction_coef        .
_refine_ls_number_reflns          8720
_refine_ls_number_parameters      608
_refine_ls_number_restraints      0
_refine_ls_R_factor_all           0.1640
_refine_ls_R_factor_gt            0.0970
_refine_ls_wR_factor_ref          0.3214
_refine_ls_wR_factor_gt           0.2484
_refine_ls_goodness_of_fit_ref    1.014
_refine_ls_restrained_S_all       1.014
_refine_ls_shift/su_max           0.000
_refine_ls_shift/su_mean          0.000
 
loop_
 _atom_site_label
 _atom_site_type_symbol
 _atom_site_fract_x
 _atom_site_fract_y
 _atom_site_fract_z
 _atom_site_U_iso_or_equiv
 _atom_site_adp_type
 _atom_site_occupancy
 _atom_site_site_symmetry_order  
 _atom_site_calc_flag
 _atom_site_refinement_flags_posn
 _atom_site_refinement_flags_adp
 _atom_site_refinement_flags_occupancy
 _atom_site_disorder_assembly
 _atom_site_disorder_group
C1 C 0.2332(4) 0.7103(4) 0.4289(2) 0.0418(10) Uani 1 1 d . . . . .
C2 C 0.3678(4) 0.7256(4) 0.4130(2) 0.0474(11) Uani 1 1 d . . . . .
H45 H 0.4086 0.7668 0.4400 0.057 Uiso 1 1 calc R U . . .
C3 C 0.4462(4) 0.6814(4) 0.3573(2) 0.0490(11) Uani 1 1 d . . . . .
H46 H 0.5385 0.6942 0.3473 0.059 Uiso 1 1 calc R U . . .
C4 C 0.3930(4) 0.6216(4) 0.3180(2) 0.0500(11) Uani 1 1 d . . . . .
H47 H 0.4483 0.5915 0.2811 0.060 Uiso 1 1 calc R U . . .
C5 C 0.2534(4) 0.6026(4) 0.3312(2) 0.0429(10) Uani 1 1 d . . . . .
C6 C 0.1969(5) 0.5395(4) 0.2904(2) 0.0483(11) Uani 1 1 d . . . . .
C7 C 0.0567(4) 0.5305(4) 0.3025(2) 0.0444(11) Uani 1 1 d . . . . .
C8 C -0.0066(5) 0.4666(4) 0.2631(2) 0.0524(12) Uani 1 1 d . . . . .
H48 H 0.0457 0.4313 0.2268 0.063 Uiso 1 1 calc R U . . .
C9 C -0.1401(5) 0.4555(4) 0.2768(2) 0.0555(13) Uani 1 1 d . . . . .
H49 H -0.1799 0.4108 0.2506 0.067 Uiso 1 1 calc R U . . .
C10 C -0.2196(5) 0.5100(4) 0.3295(2) 0.0524(12) Uani 1 1 d . . . . .
H50 H -0.3127 0.5008 0.3384 0.063 Uiso 1 1 calc R U . . .
C11 C -0.1672(4) 0.5758(4) 0.3681(2) 0.0442(10) Uani 1 1 d . . . . .
C12 C -0.0243(4) 0.5856(4) 0.3556(2) 0.0432(10) Uani 1 1 d . . . . .
C13 C 0.0354(4) 0.6428(4) 0.3965(2) 0.0420(10) Uani 1 1 d . . . . .
H51 H -0.0191 0.6774 0.4325 0.050 Uiso 1 1 calc R U . . .
C14 C 0.1723(4) 0.6507(4) 0.3861(2) 0.0430(10) Uani 1 1 d . . . . .
C15 C 0.2822(4) 0.4781(4) 0.2360(2) 0.0484(11) Uani 1 1 d . . . . .
C16 C 0.3607(4) 0.3692(4) 0.2442(2) 0.0502(11) Uani 1 1 d . . . . .
C17 C 0.4345(5) 0.3121(5) 0.1929(3) 0.0609(14) Uani 1 1 d . . . . .
H52 H 0.4867 0.2402 0.1984 0.073 Uiso 1 1 calc R U . . .
C18 C 0.4363(6) 0.3539(5) 0.1342(3) 0.0716(16) Uani 1 1 d . . . . .
C19 C 0.3625(7) 0.4606(6) 0.1271(3) 0.0789(18) Uani 1 1 d . . . . .
H53 H 0.3640 0.4916 0.0868 0.095 Uiso 1 1 calc R U . . .
C20 C 0.2867(6) 0.5234(5) 0.1764(3) 0.0673(15) Uani 1 1 d . . . . .
C21 C 0.3638(5) 0.3174(5) 0.3063(3) 0.0589(13) Uani 1 1 d . . . . .
H54 H 0.3948 0.2315 0.3029 0.088 Uiso 1 1 calc R U . . .
H55 H 0.2743 0.3245 0.3325 0.088 Uiso 1 1 calc R U . . .
H56 H 0.4243 0.3622 0.3244 0.088 Uiso 1 1 calc R U . . .
C22 C 0.5155(8) 0.2865(8) 0.0792(3) 0.103(2) Uani 1 1 d . . . . .
H57 H 0.5955 0.2466 0.0894 0.155 Uiso 1 1 calc R U . . .
H58 H 0.5411 0.3440 0.0449 0.155 Uiso 1 1 calc R U . . .
H59 H 0.4614 0.2251 0.0676 0.155 Uiso 1 1 calc R U . . .
C23 C 0.2098(8) 0.6404(6) 0.1666(3) 0.095(2) Uani 1 1 d . . . . .
H60 H 0.2172 0.6552 0.1225 0.142 Uiso 1 1 calc R U . . .
H61 H 0.2461 0.7078 0.1839 0.142 Uiso 1 1 calc R U . . .
H62 H 0.1162 0.6341 0.1869 0.142 Uiso 1 1 calc R U . . .
C24 C 0.1538(4) 0.7572(4) 0.4876(2) 0.0411(10) Uani 1 1 d . . . . .
C25 C 0.1536(4) 0.8797(4) 0.5023(2) 0.0445(10) Uani 1 1 d . . . . .
H23 H 0.2055 0.9328 0.4738 0.053 Uiso 1 1 calc R U . . .
C26 C 0.0812(4) 0.9252(4) 0.5563(2) 0.0451(11) Uani 1 1 d . . . . .
H24 H 0.0834 1.0092 0.5642 0.054 Uiso 1 1 calc R U . . .
C27 C 0.0045(4) 0.8517(4) 0.6000(2) 0.0408(10) Uani 1 1 d . . . . .
C28 C 0.0063(4) 0.7277(4) 0.5863(2) 0.0445(10) Uani 1 1 d . . . . .
H25 H -0.0431 0.6742 0.6155 0.053 Uiso 1 1 calc R U . . .
C29 C 0.0777(4) 0.6828(4) 0.5319(2) 0.0459(11) Uani 1 1 d . . . . .
H26 H 0.0756 0.5988 0.5238 0.055 Uiso 1 1 calc R U . . .
C30 C -0.0764(4) 0.9004(4) 0.6577(2) 0.0430(10) Uani 1 1 d . . . . .
C31 C -0.0908(4) 0.8346(4) 0.7131(2) 0.0475(11) Uani 1 1 d . . . . .
H27 H -0.0435 0.7580 0.7138 0.057 Uiso 1 1 calc R U . . .
C32 C -0.1698(4) 0.8764(4) 0.7659(2) 0.0476(11) Uani 1 1 d . . . . .
H28 H -0.1757 0.8288 0.8025 0.057 Uiso 1 1 calc R U . . .
C33 C -0.2426(4) 0.9877(4) 0.7679(2) 0.0448(11) Uani 1 1 d . . . . .
C34 C -0.2259(4) 1.0560(4) 0.7130(2) 0.0464(11) Uani 1 1 d . . . . .
H29 H -0.2718 1.1334 0.7127 0.056 Uiso 1 1 calc R U . . .
C35 C -0.1455(4) 1.0142(4) 0.6602(2) 0.0427(10) Uani 1 1 d . . . . .
H30 H -0.1359 1.0636 0.6241 0.051 Uiso 1 1 calc R U . . .
C36 C -0.3314(4) 1.0345(4) 0.8245(2) 0.0503(11) Uani 1 1 d . . . . .
C37 C -0.2839(5) 1.0529(6) 0.8754(3) 0.0685(15) Uani 1 1 d . . . . .
H31 H -0.1945 1.0279 0.8759 0.082 Uiso 1 1 calc R U . . .
C38 C -0.3649(6) 1.1084(8) 0.9270(3) 0.105(3) Uani 1 1 d . . . . .
H32 H -0.3298 1.1195 0.9621 0.126 Uiso 1 1 calc R U . . .
C39 C -0.4921(7) 1.1464(10) 0.9278(3) 0.118(3) Uani 1 1 d . . . . .
H33 H -0.5437 1.1877 0.9625 0.141 Uiso 1 1 calc R U . . .
C40 C -0.5496(6) 1.1249(7) 0.8767(3) 0.083(2) Uani 1 1 d . . . . .
C41 C -0.6846(6) 1.1596(8) 0.8777(3) 0.092(2) Uani 1 1 d . . . . .
C42 C -0.7388(5) 1.1306(5) 0.8286(2) 0.0625(14) Uani 1 1 d . . . . .
C43 C -0.8754(5) 1.1627(6) 0.8281(3) 0.0696(16) Uani 1 1 d . . . . .
H34 H -0.9282 1.2090 0.8607 0.084 Uiso 1 1 calc R U . . .
C44 C -0.9301(5) 1.1286(5) 0.7826(3) 0.0664(15) Uani 1 1 d . . . . .
H35 H -1.0210 1.1501 0.7837 0.080 Uiso 1 1 calc R U . . .
C45 C -0.8543(5) 1.0616(5) 0.7337(3) 0.0576(13) Uani 1 1 d . . . . .
H36 H -0.8955 1.0386 0.7021 0.069 Uiso 1 1 calc R U . . .
C46 C -0.7221(4) 1.0277(4) 0.7297(2) 0.0490(11) Uani 1 1 d . . . . .
C47 C -0.6618(4) 1.0639(4) 0.7785(2) 0.0522(12) Uani 1 1 d . . . . .
C48 C -0.5277(4) 1.0318(4) 0.7783(2) 0.0499(11) Uani 1 1 d . . . . .
H63 H -0.4754 0.9864 0.7452 0.060 Uiso 1 1 calc R U . . .
C49 C -0.4701(5) 1.0654(5) 0.8256(2) 0.0554(12) Uani 1 1 d . . . . .
C50 C -0.7538(9) 1.2417(8) 0.9257(3) 0.069(3) Uiso 0.540(11) 1 d G . P A 2
C51 C -0.7629(9) 1.3681(8) 0.9268(3) 0.073(3) Uiso 0.540(11) 1 d G . P A 2
C52 C -0.8326(10) 1.4275(7) 0.9791(4) 0.108(5) Uiso 0.540(11) 1 d G . P A 2
H1 H -0.8388 1.5139 0.9799 0.130 Uiso 0.540(11) 1 calc R U P A 2
C53 C -0.8931(10) 1.3606(9) 1.0303(4) 0.094(4) Uiso 0.540(11) 1 d G . P A 2
C54 C -0.8839(11) 1.2343(9) 1.0292(4) 0.124(6) Uiso 0.540(11) 1 d G . P A 2
H2 H -0.9253 1.1885 1.0641 0.148 Uiso 0.540(11) 1 calc R U P A 2
C55 C -0.8143(10) 1.1748(7) 0.9768(4) 0.084(4) Uiso 0.540(11) 1 d G . P A 2
C56 C -0.6988(15) 1.4385(15) 0.8649(8) 0.100(5) Uiso 0.540(11) 1 d . . P A 2
H5 H -0.6049 1.4115 0.8518 0.150 Uiso 0.540(11) 1 calc R U P A 2
H6 H -0.7063 1.5262 0.8721 0.150 Uiso 0.540(11) 1 calc R U P A 2
H7 H -0.7459 1.4210 0.8329 0.150 Uiso 0.540(11) 1 calc R U P A 2
C57 C -0.972(2) 1.420(2) 1.0901(9) 0.140(7) Uiso 0.540(11) 1 d . . P A 2
H8 H -0.9706 1.5089 1.0856 0.211 Uiso 0.540(11) 1 calc R U P A 2
H9 H -0.9322 1.3929 1.1244 0.211 Uiso 0.540(11) 1 calc R U P A 2
H10 H -1.0646 1.3967 1.0982 0.211 Uiso 0.540(11) 1 calc R U P A 2
C58 C -0.808(2) 1.046(2) 0.9837(10) 0.140(7) Uiso 0.540(11) 1 d . . P A 2
H11 H -0.7154 1.0156 0.9799 0.209 Uiso 0.540(11) 1 calc R U P A 2
H12 H -0.8444 1.0099 0.9518 0.209 Uiso 0.540(11) 1 calc R U P A 2
H13 H -0.8602 1.0226 1.0242 0.209 Uiso 0.540(11) 1 calc R U P A 2
C59 C -0.7790(11) 1.1823(11) 0.9375(4) 0.076(4) Uiso 0.460(11) 1 d G . P A 1
C60 C -0.7732(12) 1.3042(10) 0.9504(5) 0.100(5) Uiso 0.460(11) 1 d G . P A 1
C61 C -0.8447(14) 1.3506(9) 1.0058(6) 0.154(9) Uiso 0.460(11) 1 d G . P A 1
H3 H -0.8407 1.4339 1.0146 0.185 Uiso 0.460(11) 1 calc R U P A 1
C62 C -0.9219(13) 1.2751(12) 1.0484(5) 0.099(5) Uiso 0.460(11) 1 d G . P A 1
C63 C -0.9277(12) 1.1532(11) 1.0355(5) 0.109(6) Uiso 0.460(11) 1 d G . P A 1
H4 H -0.9805 1.1017 1.0646 0.130 Uiso 0.460(11) 1 calc R U P A 1
C64 C -0.8562(12) 1.1068(9) 0.9800(5) 0.090(5) Uiso 0.460(11) 1 d G . P A 1
C65 C -0.7101(18) 1.4088(17) 0.9016(9) 0.096(5) Uiso 0.460(11) 1 d . . P A 1
H14 H -0.7338 1.4890 0.9199 0.144 Uiso 0.460(11) 1 calc R U P A 1
H15 H -0.7453 1.4050 0.8644 0.144 Uiso 0.460(11) 1 calc R U P A 1
H16 H -0.6132 1.3955 0.8909 0.144 Uiso 0.460(11) 1 calc R U P A 1
C66 C -1.017(3) 1.309(3) 1.1134(12) 0.160(10) Uiso 0.460(11) 1 d . . P A 1
H17 H -1.0584 1.2360 1.1326 0.241 Uiso 0.460(11) 1 calc R U P A 1
H18 H -1.0855 1.3705 1.1072 0.241 Uiso 0.460(11) 1 calc R U P A 1
H19 H -0.9638 1.3415 1.1400 0.241 Uiso 0.460(11) 1 calc R U P A 1
C67 C -0.8518(18) 0.9763(16) 0.9641(8) 0.095(5) Uiso 0.460(11) 1 d . . P A 1
H20 H -0.8901 0.9288 1.0009 0.142 Uiso 0.460(11) 1 calc R U P A 1
H21 H -0.7594 0.9470 0.9484 0.142 Uiso 0.460(11) 1 calc R U P A 1
H22 H -0.9030 0.9672 0.9327 0.142 Uiso 0.460(11) 1 calc R U P A 1
C68 C -0.6454(4) 0.9599(4) 0.6762(2) 0.0463(11) Uani 1 1 d . . . . .
C69 C -0.5244(4) 0.9979(4) 0.6428(2) 0.0450(10) Uani 1 1 d . . . . .
H37 H -0.4906 1.0698 0.6543 0.054 Uiso 1 1 calc R U . . .
C70 C -0.4535(4) 0.9343(4) 0.5940(2) 0.0462(11) Uani 1 1 d . . . . .
H38 H -0.3710 0.9631 0.5724 0.055 Uiso 1 1 calc R U . . .
C71 C -0.4976(4) 0.8278(4) 0.5744(2) 0.0423(10) Uani 1 1 d . . . . .
C72 C -0.6209(4) 0.7907(4) 0.6073(2) 0.0462(11) Uani 1 1 d . . . . .
H39 H -0.6563 0.7204 0.5950 0.055 Uiso 1 1 calc R U . . .
C73 C -0.6917(4) 0.8546(4) 0.6574(2) 0.0486(11) Uani 1 1 d . . . . .
H40 H -0.7738 0.8262 0.6794 0.058 Uiso 1 1 calc R U . . .
C74 C -0.4171(4) 0.7616(4) 0.5221(2) 0.0442(11) Uani 1 1 d . . . . .
C75 C -0.3438(4) 0.8247(4) 0.4719(2) 0.0452(11) Uani 1 1 d . . . . .
H41 H -0.3489 0.9112 0.4717 0.054 Uiso 1 1 calc R U . . .
C76 C -0.2646(4) 0.7649(4) 0.4228(2) 0.0443(10) Uani 1 1 d . . . . .
H42 H -0.2171 0.8107 0.3893 0.053 Uiso 1 1 calc R U . . .
C77 C -0.2529(4) 0.6376(4) 0.4213(2) 0.0443(11) Uani 1 1 d . . . . .
C78 C -0.3274(4) 0.5743(4) 0.4711(2) 0.0472(11) Uani 1 1 d . . . . .
H43 H -0.3235 0.4879 0.4710 0.057 Uiso 1 1 calc R U . . .
C79 C -0.4062(4) 0.6346(4) 0.5203(2) 0.0460(11) Uani 1 1 d . . . . .
H44 H -0.4542 0.5889 0.5538 0.055 Uiso 1 1 calc R U . . .
 
loop_
 _atom_site_aniso_label
 _atom_site_aniso_U_11
 _atom_site_aniso_U_22
 _atom_site_aniso_U_33
 _atom_site_aniso_U_23
 _atom_site_aniso_U_13
 _atom_site_aniso_U_12
C1 0.037(2) 0.032(2) 0.058(3) -0.0059(19) -0.0160(19) 0.0076(17)
C2 0.033(2) 0.042(3) 0.070(3) -0.009(2) -0.019(2) 0.0046(18)
C3 0.033(2) 0.039(2) 0.073(3) -0.008(2) -0.010(2) 0.0067(19)
C4 0.040(2) 0.042(3) 0.067(3) -0.008(2) -0.010(2) 0.0106(19)
C5 0.038(2) 0.034(2) 0.056(3) -0.0042(19) -0.012(2) 0.0065(18)
C6 0.051(3) 0.035(2) 0.061(3) 0.000(2) -0.018(2) 0.0076(19)
C7 0.040(2) 0.037(2) 0.058(3) -0.008(2) -0.015(2) 0.0103(18)
C8 0.055(3) 0.042(3) 0.063(3) -0.014(2) -0.023(2) 0.013(2)
C9 0.055(3) 0.041(3) 0.080(3) -0.014(2) -0.036(3) 0.007(2)
C10 0.048(3) 0.038(2) 0.078(3) -0.010(2) -0.029(2) 0.003(2)
C11 0.039(2) 0.036(2) 0.060(3) -0.003(2) -0.017(2) 0.0042(18)
C12 0.041(2) 0.032(2) 0.060(3) -0.001(2) -0.019(2) 0.0009(18)
C13 0.035(2) 0.039(2) 0.051(2) -0.0057(19) -0.0100(18) 0.0060(18)
C14 0.034(2) 0.032(2) 0.064(3) -0.005(2) -0.016(2) 0.0036(17)
C15 0.043(2) 0.041(3) 0.059(3) -0.009(2) -0.008(2) 0.0051(19)
C16 0.040(2) 0.043(3) 0.068(3) -0.013(2) -0.014(2) 0.003(2)
C17 0.054(3) 0.046(3) 0.081(4) -0.016(3) -0.013(3) 0.012(2)
C18 0.067(4) 0.060(3) 0.082(4) -0.017(3) -0.002(3) 0.001(3)
C19 0.097(5) 0.079(4) 0.056(3) -0.012(3) -0.011(3) 0.016(4)
C20 0.072(4) 0.060(3) 0.066(3) -0.006(3) -0.010(3) 0.011(3)
C21 0.048(3) 0.046(3) 0.084(4) -0.009(2) -0.019(2) 0.010(2)
C22 0.107(5) 0.108(6) 0.085(5) -0.039(4) -0.001(4) 0.023(4)
C23 0.122(6) 0.072(4) 0.079(4) 0.009(3) -0.009(4) 0.034(4)
C24 0.028(2) 0.038(2) 0.060(3) -0.004(2) -0.0161(19) 0.0018(17)
C25 0.035(2) 0.044(3) 0.056(3) -0.005(2) -0.012(2) -0.0035(19)
C26 0.035(2) 0.039(2) 0.064(3) -0.009(2) -0.018(2) 0.0010(19)
C27 0.030(2) 0.038(2) 0.057(3) -0.005(2) -0.0148(19) 0.0040(17)
C28 0.036(2) 0.036(2) 0.060(3) -0.001(2) -0.007(2) 0.0013(18)
C29 0.039(2) 0.035(2) 0.065(3) -0.008(2) -0.016(2) 0.0051(19)
C30 0.033(2) 0.040(2) 0.061(3) -0.006(2) -0.020(2) -0.0023(18)
C31 0.042(2) 0.042(2) 0.059(3) -0.004(2) -0.014(2) 0.0070(19)
C32 0.042(2) 0.045(3) 0.059(3) -0.002(2) -0.019(2) 0.004(2)
C33 0.031(2) 0.046(3) 0.060(3) -0.011(2) -0.0176(19) 0.0029(18)
C34 0.041(2) 0.038(2) 0.063(3) -0.006(2) -0.020(2) 0.0046(19)
C35 0.037(2) 0.041(2) 0.052(3) -0.004(2) -0.0136(19) 0.0021(18)
C36 0.046(3) 0.049(3) 0.057(3) -0.007(2) -0.016(2) 0.006(2)
C37 0.051(3) 0.090(4) 0.068(3) -0.015(3) -0.025(3) 0.016(3)
C38 0.065(4) 0.183(8) 0.071(4) -0.056(5) -0.031(3) 0.048(5)
C39 0.069(4) 0.206(9) 0.080(4) -0.072(5) -0.028(3) 0.054(5)
C40 0.057(3) 0.122(6) 0.073(4) -0.033(4) -0.023(3) 0.025(3)
C41 0.053(3) 0.148(7) 0.074(4) -0.046(4) -0.020(3) 0.042(4)
C42 0.038(3) 0.079(4) 0.068(3) -0.018(3) -0.010(2) 0.017(2)
C43 0.039(3) 0.093(4) 0.076(4) -0.024(3) -0.013(2) 0.019(3)
C44 0.035(2) 0.066(3) 0.097(4) -0.013(3) -0.016(3) 0.010(2)
C45 0.041(3) 0.054(3) 0.081(3) -0.008(3) -0.020(2) 0.002(2)
C46 0.037(2) 0.044(3) 0.068(3) -0.006(2) -0.016(2) 0.0035(19)
C47 0.040(2) 0.054(3) 0.063(3) -0.006(2) -0.014(2) 0.008(2)
C48 0.038(2) 0.045(3) 0.067(3) -0.005(2) -0.015(2) 0.0064(19)
C49 0.046(3) 0.064(3) 0.057(3) -0.012(2) -0.013(2) 0.009(2)
C68 0.034(2) 0.043(3) 0.066(3) 0.003(2) -0.021(2) 0.0001(19)
C69 0.041(2) 0.038(2) 0.058(3) -0.005(2) -0.016(2) -0.0023(19)
C70 0.033(2) 0.047(3) 0.059(3) 0.001(2) -0.011(2) -0.0036(19)
C71 0.033(2) 0.041(2) 0.056(3) -0.003(2) -0.0162(19) 0.0020(18)
C72 0.034(2) 0.045(3) 0.063(3) -0.006(2) -0.018(2) -0.0024(19)
C73 0.030(2) 0.049(3) 0.069(3) -0.001(2) -0.015(2) -0.0043(19)
C74 0.030(2) 0.041(2) 0.066(3) -0.001(2) -0.020(2) -0.0021(18)
C75 0.035(2) 0.037(2) 0.069(3) -0.005(2) -0.022(2) -0.0015(18)
C76 0.035(2) 0.039(2) 0.062(3) -0.001(2) -0.016(2) -0.0007(18)
C77 0.031(2) 0.042(3) 0.064(3) -0.006(2) -0.020(2) 0.0030(18)
C78 0.035(2) 0.036(2) 0.074(3) -0.004(2) -0.021(2) -0.0022(18)
C79 0.034(2) 0.041(2) 0.066(3) -0.001(2) -0.016(2) -0.0038(18)
 
_geom_special_details
;
 All esds (except the esd in the dihedral angle between two l.s. planes)
 are estimated using the full covariance matrix.  The cell esds are taken
 into account individually in the estimation of esds in distances, angles
 and torsion angles; correlations between esds in cell parameters are only
 used when they are defined by crystal symmetry.  An approximate (isotropic)
 treatment of cell esds is used for estimating esds involving l.s. planes.
;
 
loop_
 _geom_bond_atom_site_label_1
 _geom_bond_atom_site_label_2
 _geom_bond_distance
 _geom_bond_site_symmetry_2
 _geom_bond_publ_flag
C1 C2 1.378(6) . ?
C1 C14 1.450(6) . ?
C1 C24 1.476(6) . ?
C2 C3 1.410(7) . ?
C3 C4 1.343(7) . ?
C4 C5 1.435(6) . ?
C5 C6 1.408(6) . ?
C5 C14 1.420(6) . ?
C6 C7 1.424(6) . ?
C6 C15 1.488(7) . ?
C7 C12 1.421(6) . ?
C7 C8 1.432(6) . ?
C8 C9 1.358(7) . ?
C9 C10 1.408(7) . ?
C10 C11 1.363(6) . ?
C11 C12 1.452(6) . ?
C11 C77 1.474(6) . ?
C12 C13 1.395(6) . ?
C13 C14 1.391(6) . ?
C15 C20 1.401(7) . ?
C15 C16 1.436(6) . ?
C16 C17 1.375(7) . ?
C16 C21 1.491(7) . ?
C17 C18 1.374(8) . ?
C18 C19 1.385(9) . ?
C18 C22 1.507(8) . ?
C19 C20 1.381(8) . ?
C20 C23 1.507(8) . ?
C24 C25 1.398(6) . ?
C24 C29 1.399(6) . ?
C25 C26 1.364(6) . ?
C26 C27 1.388(6) . ?
C27 C28 1.407(6) . ?
C27 C30 1.470(6) . ?
C28 C29 1.366(6) . ?
C30 C35 1.400(6) . ?
C30 C31 1.400(6) . ?
C31 C32 1.354(6) . ?
C32 C33 1.395(6) . ?
C33 C34 1.402(7) . ?
C33 C36 1.477(6) . ?
C34 C35 1.360(6) . ?
C36 C37 1.360(7) . ?
C36 C49 1.448(6) . ?
C37 C38 1.399(8) . ?
C38 C39 1.352(8) . ?
C39 C40 1.431(9) . ?
C40 C49 1.405(8) . ?
C40 C41 1.419(8) . ?
C41 C42 1.391(8) . ?
C41 C50 1.457(9) . ?
C41 C59 1.488(10) . ?
C42 C47 1.419(7) . ?
C42 C43 1.437(7) . ?
C43 C44 1.341(8) . ?
C44 C45 1.398(7) . ?
C45 C46 1.378(6) . ?
C46 C47 1.449(7) . ?
C46 C68 1.476(7) . ?
C47 C48 1.408(6) . ?
C48 C49 1.393(7) . ?
C50 C51 1.3900 . ?
C50 C55 1.3900 . ?
C51 C52 1.3900 . ?
C51 C56 1.596(18) . ?
C52 C53 1.3900 . ?
C53 C54 1.3900 . ?
C53 C57 1.547(19) . ?
C54 C55 1.3900 . ?
C55 C58 1.43(2) . ?
C59 C60 1.3900 . ?
C59 C64 1.3900 . ?
C60 C61 1.3900 . ?
C60 C65 1.63(2) . ?
C61 C62 1.3900 . ?
C62 C63 1.3900 . ?
C62 C66 1.60(3) . ?
C63 C64 1.3900 . ?
C64 C67 1.49(2) . ?
C68 C69 1.390(6) . ?
C68 C73 1.393(7) . ?
C69 C70 1.360(6) . ?
C70 C71 1.401(6) . ?
C71 C72 1.403(6) . ?
C71 C74 1.463(6) . ?
C72 C73 1.381(7) . ?
C74 C79 1.398(6) . ?
C74 C75 1.401(7) . ?
C75 C76 1.374(6) . ?
C76 C77 1.401(6) . ?
C77 C78 1.400(7) . ?
C78 C79 1.377(7) . ?
 
loop_
 _geom_angle_atom_site_label_1
 _geom_angle_atom_site_label_2
 _geom_angle_atom_site_label_3
 _geom_angle
 _geom_angle_site_symmetry_1
 _geom_angle_site_symmetry_3
 _geom_angle_publ_flag
C2 C1 C14 118.5(4) . . ?
C2 C1 C24 120.0(4) . . ?
C14 C1 C24 121.5(4) . . ?
C1 C2 C3 121.2(4) . . ?
C4 C3 C2 121.4(4) . . ?
C3 C4 C5 120.6(4) . . ?
C6 C5 C14 120.4(4) . . ?
C6 C5 C4 121.0(4) . . ?
C14 C5 C4 118.6(4) . . ?
C5 C6 C7 119.5(4) . . ?
C5 C6 C15 120.9(4) . . ?
C7 C6 C15 119.5(4) . . ?
C12 C7 C6 119.6(4) . . ?
C12 C7 C8 118.2(4) . . ?
C6 C7 C8 122.2(4) . . ?
C9 C8 C7 121.2(4) . . ?
C8 C9 C10 120.2(4) . . ?
C11 C10 C9 122.1(5) . . ?
C10 C11 C12 118.7(4) . . ?
C10 C11 C77 121.3(4) . . ?
C12 C11 C77 120.0(4) . . ?
C13 C12 C7 119.4(4) . . ?
C13 C12 C11 121.0(4) . . ?
C7 C12 C11 119.5(4) . . ?
C14 C13 C12 121.9(4) . . ?
C13 C14 C5 119.0(4) . . ?
C13 C14 C1 121.4(4) . . ?
C5 C14 C1 119.5(4) . . ?
C20 C15 C16 118.7(4) . . ?
C20 C15 C6 121.4(4) . . ?
C16 C15 C6 119.9(4) . . ?
C17 C16 C15 118.5(5) . . ?
C17 C16 C21 119.8(4) . . ?
C15 C16 C21 121.7(4) . . ?
C18 C17 C16 123.2(5) . . ?
C17 C18 C19 117.7(5) . . ?
C17 C18 C22 121.4(6) . . ?
C19 C18 C22 120.9(6) . . ?
C20 C19 C18 122.4(6) . . ?
C19 C20 C15 119.6(5) . . ?
C19 C20 C23 120.6(5) . . ?
C15 C20 C23 119.8(5) . . ?
C25 C24 C29 116.4(4) . . ?
C25 C24 C1 121.0(4) . . ?
C29 C24 C1 122.6(4) . . ?
C26 C25 C24 122.1(4) . . ?
C25 C26 C27 121.6(4) . . ?
C26 C27 C28 116.8(4) . . ?
C26 C27 C30 122.0(4) . . ?
C28 C27 C30 121.1(4) . . ?
C29 C28 C27 121.4(4) . . ?
C28 C29 C24 121.7(4) . . ?
C35 C30 C31 116.1(4) . . ?
C35 C30 C27 122.0(4) . . ?
C31 C30 C27 121.9(4) . . ?
C32 C31 C30 122.3(4) . . ?
C31 C32 C33 121.6(4) . . ?
C32 C33 C34 116.6(4) . . ?
C32 C33 C36 122.7(4) . . ?
C34 C33 C36 120.7(4) . . ?
C35 C34 C33 121.6(4) . . ?
C34 C35 C30 121.8(4) . . ?
C37 C36 C49 119.2(4) . . ?
C37 C36 C33 120.9(4) . . ?
C49 C36 C33 119.9(4) . . ?
C36 C37 C38 120.8(5) . . ?
C39 C38 C37 121.4(5) . . ?
C38 C39 C40 120.4(6) . . ?
C49 C40 C41 120.3(5) . . ?
C49 C40 C39 118.4(5) . . ?
C41 C40 C39 121.3(5) . . ?
C42 C41 C40 119.5(5) . . ?
C42 C41 C50 122.3(5) . . ?
C40 C41 C50 117.4(6) . . ?
C42 C41 C59 117.0(6) . . ?
C40 C41 C59 119.6(7) . . ?
C41 C42 C47 120.7(4) . . ?
C41 C42 C43 121.3(5) . . ?
C47 C42 C43 117.9(5) . . ?
C44 C43 C42 121.4(5) . . ?
C43 C44 C45 120.5(5) . . ?
C46 C45 C44 122.5(5) . . ?
C45 C46 C47 117.7(4) . . ?
C45 C46 C68 120.4(4) . . ?
C47 C46 C68 121.9(4) . . ?
C48 C47 C42 118.6(4) . . ?
C48 C47 C46 121.3(4) . . ?
C42 C47 C46 120.0(4) . . ?
C49 C48 C47 121.3(4) . . ?
C48 C49 C40 119.3(5) . . ?
C48 C49 C36 121.1(4) . . ?
C40 C49 C36 119.5(5) . . ?
C51 C50 C55 120.0 . . ?
C51 C50 C41 130.3(6) . . ?
C55 C50 C41 109.7(6) . . ?
C52 C51 C50 120.0 . . ?
C52 C51 C56 122.9(8) . . ?
C50 C51 C56 117.0(8) . . ?
C51 C52 C53 120.0 . . ?
C52 C53 C54 120.0 . . ?
C52 C53 C57 123.0(10) . . ?
C54 C53 C57 117.0(10) . . ?
C55 C54 C53 120.0 . . ?
C54 C55 C50 120.0 . . ?
C54 C55 C58 113.4(11) . . ?
C50 C55 C58 126.5(11) . . ?
C60 C59 C64 120.0 . . ?
C60 C59 C41 106.7(8) . . ?
C64 C59 C41 133.1(8) . . ?
C59 C60 C61 120.0 . . ?
C59 C60 C65 125.8(10) . . ?
C61 C60 C65 113.3(10) . . ?
C60 C61 C62 120.0 . . ?
C63 C62 C61 120.0 . . ?
C63 C62 C66 111.1(14) . . ?
C61 C62 C66 128.8(14) . . ?
C64 C63 C62 120.0 . . ?
C63 C64 C59 120.0 . . ?
C63 C64 C67 123.2(10) . . ?
C59 C64 C67 116.7(10) . . ?
C69 C68 C73 117.3(4) . . ?
C69 C68 C46 121.7(4) . . ?
C73 C68 C46 121.0(4) . . ?
C70 C69 C68 121.4(4) . . ?
C69 C70 C71 122.3(4) . . ?
C70 C71 C72 116.4(4) . . ?
C70 C71 C74 120.4(4) . . ?
C72 C71 C74 123.2(4) . . ?
C73 C72 C71 121.1(4) . . ?
C72 C73 C68 121.5(4) . . ?
C79 C74 C75 117.1(4) . . ?
C79 C74 C71 122.5(4) . . ?
C75 C74 C71 120.4(4) . . ?
C76 C75 C74 121.7(4) . . ?
C75 C76 C77 121.1(4) . . ?
C78 C77 C76 117.3(4) . . ?
C78 C77 C11 122.7(4) . . ?
C76 C77 C11 120.0(4) . . ?
C79 C78 C77 121.4(4) . . ?
C78 C79 C74 121.4(4) . . ?
 
loop_
 _geom_torsion_atom_site_label_1
 _geom_torsion_atom_site_label_2
 _geom_torsion_atom_site_label_3
 _geom_torsion_atom_site_label_4
 _geom_torsion
 _geom_torsion_site_symmetry_1
 _geom_torsion_site_symmetry_2
 _geom_torsion_site_symmetry_3
 _geom_torsion_site_symmetry_4
 _geom_torsion_publ_flag
C14 C1 C2 C3 -2.0(6) . . . . ?
C24 C1 C2 C3 179.8(4) . . . . ?
C1 C2 C3 C4 -0.8(7) . . . . ?
C2 C3 C4 C5 1.1(7) . . . . ?
C3 C4 C5 C6 -179.7(4) . . . . ?
C3 C4 C5 C14 1.3(6) . . . . ?
C14 C5 C6 C7 3.8(6) . . . . ?
C4 C5 C6 C7 -175.1(4) . . . . ?
C14 C5 C6 C15 -173.8(4) . . . . ?
C4 C5 C6 C15 7.2(6) . . . . ?
C5 C6 C7 C12 0.2(6) . . . . ?
C15 C6 C7 C12 177.8(4) . . . . ?
C5 C6 C7 C8 -179.3(4) . . . . ?
C15 C6 C7 C8 -1.7(6) . . . . ?
C12 C7 C8 C9 -1.9(6) . . . . ?
C6 C7 C8 C9 177.6(4) . . . . ?
C7 C8 C9 C10 1.7(7) . . . . ?
C8 C9 C10 C11 0.5(7) . . . . ?
C9 C10 C11 C12 -2.4(7) . . . . ?
C9 C10 C11 C77 176.7(4) . . . . ?
C6 C7 C12 C13 -3.0(6) . . . . ?
C8 C7 C12 C13 176.5(4) . . . . ?
C6 C7 C12 C11 -179.6(4) . . . . ?
C8 C7 C12 C11 -0.1(6) . . . . ?
C10 C11 C12 C13 -174.4(4) . . . . ?
C77 C11 C12 C13 6.5(6) . . . . ?
C10 C11 C12 C7 2.1(6) . . . . ?
C77 C11 C12 C7 -177.0(4) . . . . ?
C7 C12 C13 C14 1.8(6) . . . . ?
C11 C12 C13 C14 178.4(4) . . . . ?
C12 C13 C14 C5 2.1(6) . . . . ?
C12 C13 C14 C1 -180.0(4) . . . . ?
C6 C5 C14 C13 -5.0(6) . . . . ?
C4 C5 C14 C13 174.0(4) . . . . ?
C6 C5 C14 C1 177.1(4) . . . . ?
C4 C5 C14 C1 -3.9(6) . . . . ?
C2 C1 C14 C13 -173.6(4) . . . . ?
C24 C1 C14 C13 4.6(6) . . . . ?
C2 C1 C14 C5 4.3(6) . . . . ?
C24 C1 C14 C5 -177.5(4) . . . . ?
C5 C6 C15 C20 -109.1(6) . . . . ?
C7 C6 C15 C20 73.3(6) . . . . ?
C5 C6 C15 C16 71.7(6) . . . . ?
C7 C6 C15 C16 -105.9(5) . . . . ?
C20 C15 C16 C17 -1.7(7) . . . . ?
C6 C15 C16 C17 177.5(5) . . . . ?
C20 C15 C16 C21 178.4(5) . . . . ?
C6 C15 C16 C21 -2.4(7) . . . . ?
C15 C16 C17 C18 -0.3(8) . . . . ?
C21 C16 C17 C18 179.7(5) . . . . ?
C16 C17 C18 C19 1.7(9) . . . . ?
C16 C17 C18 C22 -178.2(6) . . . . ?
C17 C18 C19 C20 -1.3(10) . . . . ?
C22 C18 C19 C20 178.7(7) . . . . ?
C18 C19 C20 C15 -0.7(10) . . . . ?
C18 C19 C20 C23 178.9(7) . . . . ?
C16 C15 C20 C19 2.1(8) . . . . ?
C6 C15 C20 C19 -177.1(5) . . . . ?
C16 C15 C20 C23 -177.4(6) . . . . ?
C6 C15 C20 C23 3.4(9) . . . . ?
C2 C1 C24 C25 55.5(5) . . . . ?
C14 C1 C24 C25 -122.7(4) . . . . ?
C2 C1 C24 C29 -123.1(5) . . . . ?
C14 C1 C24 C29 58.8(5) . . . . ?
C29 C24 C25 C26 -1.3(6) . . . . ?
C1 C24 C25 C26 -179.9(4) . . . . ?
C24 C25 C26 C27 0.6(6) . . . . ?
C25 C26 C27 C28 0.8(6) . . . . ?
C25 C26 C27 C30 -178.5(4) . . . . ?
C26 C27 C28 C29 -1.6(6) . . . . ?
C30 C27 C28 C29 177.7(4) . . . . ?
C27 C28 C29 C24 0.9(6) . . . . ?
C25 C24 C29 C28 0.5(6) . . . . ?
C1 C24 C29 C28 179.1(4) . . . . ?
C26 C27 C30 C35 38.5(6) . . . . ?
C28 C27 C30 C35 -140.7(4) . . . . ?
C26 C27 C30 C31 -142.6(4) . . . . ?
C28 C27 C30 C31 38.1(6) . . . . ?
C35 C30 C31 C32 1.9(6) . . . . ?
C27 C30 C31 C32 -177.0(4) . . . . ?
C30 C31 C32 C33 0.6(7) . . . . ?
C31 C32 C33 C34 -2.4(6) . . . . ?
C31 C32 C33 C36 178.9(4) . . . . ?
C32 C33 C34 C35 1.8(6) . . . . ?
C36 C33 C34 C35 -179.5(4) . . . . ?
C33 C34 C35 C30 0.7(7) . . . . ?
C31 C30 C35 C34 -2.5(6) . . . . ?
C27 C30 C35 C34 176.4(4) . . . . ?
C32 C33 C36 C37 58.8(7) . . . . ?
C34 C33 C36 C37 -119.9(5) . . . . ?
C32 C33 C36 C49 -123.5(5) . . . . ?
C34 C33 C36 C49 57.8(6) . . . . ?
C49 C36 C37 C38 -4.1(9) . . . . ?
C33 C36 C37 C38 173.6(6) . . . . ?
C36 C37 C38 C39 -0.7(13) . . . . ?
C37 C38 C39 C40 3.4(15) . . . . ?
C38 C39 C40 C49 -1.1(14) . . . . ?
C38 C39 C40 C41 177.3(9) . . . . ?
C49 C40 C41 C42 2.1(12) . . . . ?
C39 C40 C41 C42 -176.2(8) . . . . ?
C49 C40 C41 C50 -167.9(7) . . . . ?
C39 C40 C41 C50 13.8(12) . . . . ?
C49 C40 C41 C59 159.0(8) . . . . ?
C39 C40 C41 C59 -19.3(13) . . . . ?
C40 C41 C42 C47 1.9(11) . . . . ?
C50 C41 C42 C47 171.3(7) . . . . ?
C59 C41 C42 C47 -155.6(7) . . . . ?
C40 C41 C42 C43 179.2(7) . . . . ?
C50 C41 C42 C43 -11.3(12) . . . . ?
C59 C41 C42 C43 21.7(11) . . . . ?
C41 C42 C43 C44 -175.9(7) . . . . ?
C47 C42 C43 C44 1.5(9) . . . . ?
C42 C43 C44 C45 -0.8(10) . . . . ?
C43 C44 C45 C46 0.0(9) . . . . ?
C44 C45 C46 C47 0.0(8) . . . . ?
C44 C45 C46 C68 -178.3(5) . . . . ?
C41 C42 C47 C48 -2.6(9) . . . . ?
C43 C42 C47 C48 180.0(5) . . . . ?
C41 C42 C47 C46 176.0(6) . . . . ?
C43 C42 C47 C46 -1.5(8) . . . . ?
C45 C46 C47 C48 179.3(5) . . . . ?
C68 C46 C47 C48 -2.4(7) . . . . ?
C45 C46 C47 C42 0.7(7) . . . . ?
C68 C46 C47 C42 179.0(5) . . . . ?
C42 C47 C48 C49 -0.7(8) . . . . ?
C46 C47 C48 C49 -179.3(5) . . . . ?
C47 C48 C49 C40 4.6(8) . . . . ?
C47 C48 C49 C36 -178.7(5) . . . . ?
C41 C40 C49 C48 -5.3(10) . . . . ?
C39 C40 C49 C48 173.1(7) . . . . ?
C41 C40 C49 C36 177.9(6) . . . . ?
C39 C40 C49 C36 -3.7(10) . . . . ?
C37 C36 C49 C48 -170.4(5) . . . . ?
C33 C36 C49 C48 11.8(7) . . . . ?
C37 C36 C49 C40 6.3(8) . . . . ?
C33 C36 C49 C40 -171.5(6) . . . . ?
C42 C41 C50 C51 -82.0(11) . . . . ?
C40 C41 C50 C51 87.7(9) . . . . ?
C42 C41 C50 C55 99.7(8) . . . . ?
C40 C41 C50 C55 -90.7(8) . . . . ?
C55 C50 C51 C52 0.0 . . . . ?
C41 C50 C51 C52 -178.2(9) . . . . ?
C55 C50 C51 C56 -176.2(9) . . . . ?
C41 C50 C51 C56 5.6(11) . . . . ?
C50 C51 C52 C53 0.0 . . . . ?
C56 C51 C52 C53 176.0(10) . . . . ?
C51 C52 C53 C54 0.0 . . . . ?
C51 C52 C53 C57 -179.9(13) . . . . ?
C52 C53 C54 C55 0.0 . . . . ?
C57 C53 C54 C55 179.9(12) . . . . ?
C53 C54 C55 C50 0.0 . . . . ?
C53 C54 C55 C58 177.0(13) . . . . ?
C51 C50 C55 C54 0.0 . . . . ?
C41 C50 C55 C54 178.5(7) . . . . ?
C51 C50 C55 C58 -176.6(15) . . . . ?
C41 C50 C55 C58 1.9(14) . . . . ?
C42 C41 C59 C60 -114.1(8) . . . . ?
C40 C41 C59 C60 88.5(9) . . . . ?
C42 C41 C59 C64 71.0(12) . . . . ?
C40 C41 C59 C64 -86.4(12) . . . . ?
C64 C59 C60 C61 0.0 . . . . ?
C41 C59 C60 C61 -175.7(9) . . . . ?
C64 C59 C60 C65 -168.4(13) . . . . ?
C41 C59 C60 C65 15.9(13) . . . . ?
C59 C60 C61 C62 0.0 . . . . ?
C65 C60 C61 C62 169.8(11) . . . . ?
C60 C61 C62 C63 0.0 . . . . ?
C60 C61 C62 C66 -177.2(18) . . . . ?
C61 C62 C63 C64 0.0 . . . . ?
C66 C62 C63 C64 177.6(15) . . . . ?
C62 C63 C64 C59 0.0 . . . . ?
C62 C63 C64 C67 176.9(14) . . . . ?
C60 C59 C64 C63 0.0 . . . . ?
C41 C59 C64 C63 174.4(11) . . . . ?
C60 C59 C64 C67 -177.1(13) . . . . ?
C41 C59 C64 C67 -2.7(14) . . . . ?
C45 C46 C68 C69 128.6(5) . . . . ?
C47 C46 C68 C69 -49.7(6) . . . . ?
C45 C46 C68 C73 -51.6(6) . . . . ?
C47 C46 C68 C73 130.1(5) . . . . ?
C73 C68 C69 C70 -0.6(6) . . . . ?
C46 C68 C69 C70 179.3(4) . . . . ?
C68 C69 C70 C71 0.2(7) . . . . ?
C69 C70 C71 C72 1.0(6) . . . . ?
C69 C70 C71 C74 -179.2(4) . . . . ?
C70 C71 C72 C73 -1.9(6) . . . . ?
C74 C71 C72 C73 178.3(4) . . . . ?
C71 C72 C73 C68 1.6(6) . . . . ?
C69 C68 C73 C72 -0.3(6) . . . . ?
C46 C68 C73 C72 179.8(4) . . . . ?
C70 C71 C74 C79 141.8(4) . . . . ?
C72 C71 C74 C79 -38.4(6) . . . . ?
C70 C71 C74 C75 -36.3(6) . . . . ?
C72 C71 C74 C75 143.5(4) . . . . ?
C79 C74 C75 C76 0.1(6) . . . . ?
C71 C74 C75 C76 178.3(4) . . . . ?
C74 C75 C76 C77 -0.7(6) . . . . ?
C75 C76 C77 C78 1.5(6) . . . . ?
C75 C76 C77 C11 -180.0(4) . . . . ?
C10 C11 C77 C78 65.8(6) . . . . ?
C12 C11 C77 C78 -115.1(5) . . . . ?
C10 C11 C77 C76 -112.6(5) . . . . ?
C12 C11 C77 C76 66.5(5) . . . . ?
C76 C77 C78 C79 -1.8(6) . . . . ?
C11 C77 C78 C79 179.8(4) . . . . ?
C77 C78 C79 C74 1.2(6) . . . . ?
C75 C74 C79 C78 -0.4(6) . . . . ?
C71 C74 C79 C78 -178.5(4) . . . . ?
 
_refine_diff_density_max    0.899
_refine_diff_density_min   -0.250
_refine_diff_density_rms    0.092

_shelx_res_file
;

    sk067Cu.res created by SHELXL-2014/7

TITL
REM  Yadorkari-X generated
CELL 1.54187 10.3380 11.0160 22.3510 88.2000 77.2720 86.4000
ZERR 2.0 0.0040 0.0060 0.0090 0.0400 0.0170 0.0300
LATT 1
REM  SPGR P-1 triclinic
SFAC C H
UNIT 140 104
SIZE 0.20 0.11 0.03
TEMP -150.0
L.S. 20
FMAP 2
PLAN -25
ACTA
CONF
LIST 4
MERG 2
OMIT -10.000000 135.000000

WGHT    0.174600    1.476400
FVAR       1.21527   0.46027
C1    1    0.233246    0.710263    0.428909    11.00000    0.03704    0.03198 =
         0.05802   -0.00588   -0.01599    0.00759
C2    1    0.367829    0.725636    0.412984    11.00000    0.03336    0.04194 =
         0.06993   -0.00947   -0.01853    0.00463
AFIX  43
H45   2    0.408592    0.766791    0.440045    11.00000   -1.20000
AFIX   0
C3    1    0.446163    0.681415    0.357265    11.00000    0.03317    0.03948 =
         0.07297   -0.00816   -0.01033    0.00675
AFIX  43
H46   2    0.538522    0.694247    0.347311    11.00000   -1.20000
AFIX   0
C4    1    0.392978    0.621558    0.317984    11.00000    0.03998    0.04157 =
         0.06654   -0.00840   -0.00992    0.01064
AFIX  43
H47   2    0.448273    0.591452    0.281087    11.00000   -1.20000
AFIX   0
C5    1    0.253359    0.602627    0.331214    11.00000    0.03839    0.03416 =
         0.05586   -0.00422   -0.01158    0.00651
C6    1    0.196925    0.539550    0.290387    11.00000    0.05058    0.03452 =
         0.06113   -0.00046   -0.01804    0.00760
C7    1    0.056667    0.530549    0.302521    11.00000    0.03958    0.03693 =
         0.05774   -0.00777   -0.01529    0.01029
C8    1   -0.006633    0.466580    0.263143    11.00000    0.05541    0.04205 =
         0.06331   -0.01440   -0.02311    0.01317
AFIX  43
H48   2    0.045665    0.431257    0.226831    11.00000   -1.20000
AFIX   0
C9    1   -0.140105    0.455477    0.276758    11.00000    0.05510    0.04130 =
         0.07962   -0.01358   -0.03645    0.00734
AFIX  43
H49   2   -0.179900    0.410768    0.250621    11.00000   -1.20000
AFIX   0
C10   1   -0.219611    0.510044    0.329492    11.00000    0.04789    0.03837 =
         0.07773   -0.00997   -0.02851    0.00347
AFIX  43
H50   2   -0.312686    0.500787    0.338423    11.00000   -1.20000
AFIX   0
C11   1   -0.167217    0.575751    0.368142    11.00000    0.03864    0.03610 =
         0.06016   -0.00320   -0.01727    0.00418
C12   1   -0.024344    0.585625    0.355566    11.00000    0.04141    0.03189 =
         0.05956   -0.00104   -0.01870    0.00090
C13   1    0.035367    0.642823    0.396464    11.00000    0.03481    0.03934 =
         0.05135   -0.00568   -0.00996    0.00601
AFIX  43
H51   2   -0.019111    0.677416    0.432465    11.00000   -1.20000
AFIX   0
C14   1    0.172319    0.650676    0.386067    11.00000    0.03446    0.03195 =
         0.06449   -0.00456   -0.01608    0.00362
C15   1    0.282158    0.478136    0.236042    11.00000    0.04261    0.04139 =
         0.05947   -0.00875   -0.00825    0.00511
C16   1    0.360720    0.369196    0.244191    11.00000    0.03999    0.04349 =
         0.06841   -0.01318   -0.01434    0.00266
C17   1    0.434486    0.312063    0.192924    11.00000    0.05390    0.04591 =
         0.08094   -0.01564   -0.01274    0.01228
AFIX  43
H52   2    0.486742    0.240204    0.198370    11.00000   -1.20000
AFIX   0
C18   1    0.436270    0.353896    0.134185    11.00000    0.06711    0.05961 =
         0.08169   -0.01704   -0.00161    0.00112
C19   1    0.362472    0.460551    0.127073    11.00000    0.09692    0.07895 =
         0.05615   -0.01165   -0.01099    0.01556
AFIX  43
H53   2    0.364036    0.491644    0.086807    11.00000   -1.20000
AFIX   0
C20   1    0.286688    0.523364    0.176375    11.00000    0.07205    0.05969 =
         0.06618   -0.00618   -0.00970    0.01057
C21   1    0.363767    0.317411    0.306329    11.00000    0.04788    0.04628 =
         0.08366   -0.00878   -0.01943    0.01003
AFIX 137
H54   2    0.394768    0.231477    0.302869    11.00000   -1.50000
H55   2    0.274271    0.324546    0.332545    11.00000   -1.50000
H56   2    0.424264    0.362168    0.324419    11.00000   -1.50000
AFIX   0
C22   1    0.515500    0.286501    0.079205    11.00000    0.10689    0.10775 =
         0.08466   -0.03905   -0.00074    0.02326
AFIX 137
H57   2    0.595514    0.246570    0.089383    11.00000   -1.50000
H58   2    0.541079    0.344015    0.044901    11.00000   -1.50000
H59   2    0.461448    0.225075    0.067566    11.00000   -1.50000
AFIX   0
C23   1    0.209817    0.640364    0.166564    11.00000    0.12154    0.07226 =
         0.07879    0.00860   -0.00870    0.03396
AFIX 137
H60   2    0.217155    0.655226    0.122515    11.00000   -1.50000
H61   2    0.246112    0.707813    0.183912    11.00000   -1.50000
H62   2    0.116198    0.634137    0.186887    11.00000   -1.50000
AFIX   0
C24   1    0.153843    0.757239    0.487610    11.00000    0.02765    0.03799 =
         0.06033   -0.00432   -0.01613    0.00184
C25   1    0.153608    0.879657    0.502321    11.00000    0.03486    0.04352 =
         0.05632   -0.00457   -0.01197   -0.00353
AFIX  43
H23   2    0.205511    0.932834    0.473811    11.00000   -1.20000
AFIX   0
C26   1    0.081248    0.925190    0.556294    11.00000    0.03533    0.03885 =
         0.06441   -0.00859   -0.01772    0.00101
AFIX  43
H24   2    0.083386    1.009197    0.564182    11.00000   -1.20000
AFIX   0
C27   1    0.004545    0.851735    0.599986    11.00000    0.02963    0.03802 =
         0.05663   -0.00527   -0.01476    0.00401
C28   1    0.006335    0.727734    0.586288    11.00000    0.03564    0.03629 =
         0.05983   -0.00118   -0.00746    0.00134
AFIX  43
H25   2   -0.043140    0.674182    0.615502    11.00000   -1.20000
AFIX   0
C29   1    0.077733    0.682752    0.531856    11.00000    0.03863    0.03526 =
         0.06514   -0.00831   -0.01553    0.00512
AFIX  43
H26   2    0.075648    0.598794    0.523850    11.00000   -1.20000
AFIX   0
C30   1   -0.076383    0.900434    0.657674    11.00000    0.03278    0.03968 =
         0.06131   -0.00582   -0.01980   -0.00229
C31   1   -0.090756    0.834600    0.713137    11.00000    0.04226    0.04180 =
         0.05897   -0.00419   -0.01417    0.00702
AFIX  43
H27   2   -0.043452    0.757961    0.713753    11.00000   -1.20000
AFIX   0
C32   1   -0.169768    0.876417    0.765930    11.00000    0.04187    0.04513 =
         0.05873   -0.00202   -0.01876    0.00416
AFIX  43
H28   2   -0.175694    0.828819    0.802519    11.00000   -1.20000
AFIX   0
C33   1   -0.242646    0.987689    0.767866    11.00000    0.03134    0.04593 =
         0.06047   -0.01078   -0.01762    0.00291
C34   1   -0.225863    1.056008    0.713013    11.00000    0.04137    0.03771 =
         0.06319   -0.00553   -0.01954    0.00459
AFIX  43
H29   2   -0.271777    1.133404    0.712711    11.00000   -1.20000
AFIX   0
C35   1   -0.145466    1.014223    0.660214    11.00000    0.03725    0.04080 =
         0.05160   -0.00382   -0.01365    0.00214
AFIX  43
H30   2   -0.135935    1.063616    0.624068    11.00000   -1.20000
AFIX   0
C36   1   -0.331446    1.034463    0.824541    11.00000    0.04599    0.04930 =
         0.05674   -0.00650   -0.01551    0.00572
C37   1   -0.283879    1.052930    0.875401    11.00000    0.05125    0.09011 =
         0.06803   -0.01522   -0.02514    0.01591
AFIX  43
H31   2   -0.194511    1.027868    0.875931    11.00000   -1.20000
AFIX   0
C38   1   -0.364906    1.108381    0.926968    11.00000    0.06538    0.18311 =
         0.07092   -0.05615   -0.03133    0.04798
AFIX  43
H32   2   -0.329774    1.119508    0.962143    11.00000   -1.20000
AFIX   0
C39   1   -0.492128    1.146442    0.927768    11.00000    0.06868    0.20635 =
         0.08039   -0.07193   -0.02768    0.05443
AFIX  43
H33   2   -0.543707    1.187741    0.962475    11.00000   -1.20000
AFIX   0
C40   1   -0.549620    1.124930    0.876674    11.00000    0.05730    0.12161 =
         0.07334   -0.03283   -0.02259    0.02458
C41   1   -0.684617    1.159573    0.877706    11.00000    0.05274    0.14792 =
         0.07409   -0.04632   -0.02007    0.04219
C42   1   -0.738813    1.130629    0.828604    11.00000    0.03816    0.07861 =
         0.06835   -0.01801   -0.01017    0.01709
C43   1   -0.875433    1.162667    0.828095    11.00000    0.03895    0.09258 =
         0.07628   -0.02430   -0.01349    0.01877
AFIX  43
H34   2   -0.928188    1.209034    0.860693    11.00000   -1.20000
AFIX   0
C44   1   -0.930113    1.128569    0.782625    11.00000    0.03523    0.06623 =
         0.09748   -0.01262   -0.01634    0.01003
AFIX  43
H35   2   -1.021007    1.150073    0.783651    11.00000   -1.20000
AFIX   0
C45   1   -0.854330    1.061605    0.733722    11.00000    0.04091    0.05435 =
         0.08055   -0.00816   -0.01990    0.00178
AFIX  43
H36   2   -0.895497    1.038593    0.702094    11.00000   -1.20000
AFIX   0
C46   1   -0.722127    1.027713    0.729668    11.00000    0.03684    0.04420 =
         0.06769   -0.00596   -0.01598    0.00355
C47   1   -0.661760    1.063880    0.778505    11.00000    0.04002    0.05414 =
         0.06263   -0.00612   -0.01370    0.00764
C48   1   -0.527663    1.031827    0.778290    11.00000    0.03818    0.04462 =
         0.06745   -0.00468   -0.01483    0.00640
AFIX  43
H63   2   -0.475419    0.986367    0.745209    11.00000   -1.20000
AFIX   0
C49   1   -0.470085    1.065431    0.825600    11.00000    0.04596    0.06388 =
         0.05653   -0.01186   -0.01344    0.00861
PART 2
AFIX  66
C50   1   -0.753792    1.241731    0.925680   -21.00000    0.06900
C51   1   -0.762919    1.368099    0.926830   -21.00000    0.07297
C52   1   -0.832555    1.427544    0.979140   -21.00000    0.10849
AFIX  43
H1    2   -0.838793    1.513911    0.979926   -21.00000   -1.20000
AFIX  65
C53   1   -0.893064    1.360623    1.030301   -21.00000    0.09418
C54   1   -0.883938    1.234256    1.029151   -21.00000    0.12365
AFIX  43
H2    2   -0.925293    1.188519    1.064117   -21.00000   -1.20000
AFIX  65
C55   1   -0.814303    1.174809    0.976841   -21.00000    0.08437
AFIX   0
C56   1   -0.698803    1.438502    0.864919   -21.00000    0.09989
AFIX 137
H5    2   -0.604916    1.411518    0.851763   -21.00000   -1.50000
H6    2   -0.706270    1.526221    0.872100   -21.00000   -1.50000
H7    2   -0.745866    1.420986    0.832889   -21.00000   -1.50000
AFIX   0
C57   1   -0.972385    1.420252    1.090095   -21.00000    0.14041
AFIX 137
H8    2   -0.970586    1.508948    1.085607   -21.00000   -1.50000
H9    2   -0.932241    1.392890    1.124385   -21.00000   -1.50000
H10   2   -1.064560    1.396680    1.098161   -21.00000   -1.50000
AFIX   0
C58   1   -0.808089    1.045666    0.983718   -21.00000    0.13959
AFIX 137
H11   2   -0.715429    1.015646    0.979931   -21.00000   -1.50000
H12   2   -0.844409    1.009917    0.951768   -21.00000   -1.50000
H13   2   -0.860158    1.022626    1.024184   -21.00000   -1.50000
PART 1
AFIX  66
C59   1   -0.778952    1.182261    0.937497    21.00000    0.07613
C60   1   -0.773194    1.304172    0.950391    21.00000    0.10013
C61   1   -0.844675    1.350616    1.005829    21.00000    0.15433
AFIX  43
H3    2   -0.840739    1.433937    1.014641    21.00000   -1.20000
AFIX  65
C62   1   -0.921914    1.275150    1.048374    21.00000    0.09895
C63   1   -0.927674    1.153239    1.035480    21.00000    0.10859
AFIX  43
H4    2   -0.980464    1.101661    1.064558    21.00000   -1.20000
AFIX  65
C64   1   -0.856194    1.106793    0.980042    21.00000    0.08978
AFIX   0
C65   1   -0.710078    1.408805    0.901571    21.00000    0.09618
AFIX 137
H14   2   -0.733781    1.489005    0.919939    21.00000   -1.50000
H15   2   -0.745255    1.404979    0.864427    21.00000   -1.50000
H16   2   -0.613178    1.395460    0.890937    21.00000   -1.50000
AFIX   0
C66   1   -1.016615    1.309088    1.113358    21.00000    0.16043
AFIX 137
H17   2   -1.058437    1.235993    1.132607    21.00000   -1.50000
H18   2   -1.085497    1.370511    1.107224    21.00000   -1.50000
H19   2   -0.963808    1.341510    1.139974    21.00000   -1.50000
AFIX   0
C67   1   -0.851807    0.976311    0.964146    21.00000    0.09460
AFIX 137
H20   2   -0.890134    0.928759    1.000855    21.00000   -1.50000
H21   2   -0.759408    0.947028    0.948440    21.00000   -1.50000
H22   2   -0.902989    0.967153    0.932666    21.00000   -1.50000
PART 0
AFIX   0
C68   1   -0.645372    0.959936    0.676199    11.00000    0.03404    0.04282 =
         0.06647    0.00302   -0.02146    0.00012
C69   1   -0.524423    0.997905    0.642782    11.00000    0.04149    0.03766 =
         0.05829   -0.00466   -0.01589   -0.00234
AFIX  43
H37   2   -0.490587    1.069791    0.654268    11.00000   -1.20000
AFIX   0
C70   1   -0.453467    0.934317    0.593978    11.00000    0.03317    0.04687 =
         0.05888    0.00051   -0.01077   -0.00355
AFIX  43
H38   2   -0.371047    0.963117    0.572401    11.00000   -1.20000
AFIX   0
C71   1   -0.497599    0.827842    0.574390    11.00000    0.03270    0.04073 =
         0.05623   -0.00323   -0.01618    0.00200
C72   1   -0.620906    0.790701    0.607309    11.00000    0.03393    0.04501 =
         0.06325   -0.00590   -0.01786   -0.00245
AFIX  43
H39   2   -0.656305    0.720430    0.594981    11.00000   -1.20000
AFIX   0
C73   1   -0.691684    0.854649    0.657358    11.00000    0.02998    0.04918 =
         0.06896   -0.00120   -0.01499   -0.00427
AFIX  43
H40   2   -0.773849    0.826191    0.679450    11.00000   -1.20000
AFIX   0
C74   1   -0.417111    0.761566    0.522116    11.00000    0.03007    0.04136 =
         0.06565   -0.00104   -0.01991   -0.00215
C75   1   -0.343757    0.824741    0.471853    11.00000    0.03539    0.03687 =
         0.06855   -0.00521   -0.02226   -0.00150
AFIX  43
H41   2   -0.348862    0.911153    0.471691    11.00000   -1.20000
AFIX   0
C76   1   -0.264620    0.764935    0.422785    11.00000    0.03486    0.03874 =
         0.06169   -0.00099   -0.01613   -0.00073
AFIX  43
H42   2   -0.217069    0.810720    0.389264    11.00000   -1.20000
AFIX   0
C77   1   -0.252855    0.637627    0.421341    11.00000    0.03061    0.04233 =
         0.06392   -0.00605   -0.01968    0.00301
C78   1   -0.327413    0.574295    0.471150    11.00000    0.03528    0.03609 =
         0.07445   -0.00397   -0.02060   -0.00218
AFIX  43
H43   2   -0.323542    0.487912    0.471009    11.00000   -1.20000
AFIX   0
C79   1   -0.406229    0.634571    0.520334    11.00000    0.03427    0.04068 =
         0.06570   -0.00088   -0.01648   -0.00382
AFIX  43
H44   2   -0.454222    0.588852    0.553764    11.00000   -1.20000

AFIX   0
HKLF 4 1 1 0 0 0 1 0 0 0 1

REM
REM R1 =  0.0970 for    4466 Fo > 4sig(Fo)  and  0.1640 for all    8720 data
REM    608 parameters refined using      0 restraints

END

WGHT      0.1746      1.4764

REM Highest difference peak  0.899,  deepest hole -0.250,  1-sigma level  0.092
Q1    1  -0.8780  1.3045  1.0326  11.00000  0.05    0.90
Q2    1  -0.7970  1.2560  0.9782  11.00000  0.05    0.83
Q3    1  -0.8541  1.3938  1.0024  11.00000  0.05    0.51
Q4    1  -0.7868  1.4947  0.9500  11.00000  0.05    0.48
Q5    1  -0.9516  1.0920  1.0402  11.00000  0.05    0.46
Q6    1  -0.7812  1.1218  1.0099  11.00000  0.05    0.42
Q7    1  -0.7291  1.2937  0.9145  11.00000  0.05    0.41
Q8    1  -0.9664  1.2174  1.0704  11.00000  0.05    0.40
Q9    1  -0.6923  1.3690  0.9328  11.00000  0.05    0.39
Q10   1  -0.8956  1.5604  1.0594  11.00000  0.05    0.37
Q11   1  -0.8233  1.4977  1.0000  11.00000  0.05    0.37
Q12   1   0.3961  0.3802  0.1864  11.00000  0.05    0.37
Q13   1  -0.9532  1.4826  1.0765  11.00000  0.05    0.36
Q14   1   0.2914  0.4932  0.1800  11.00000  0.05    0.34
Q15   1  -0.9713  1.3619  1.1030  11.00000  0.05    0.34
Q16   1   0.2096  0.7089  0.4729  11.00000  0.05    0.34
Q17   1  -0.1904  0.5735  0.4048  11.00000  0.05    0.33
Q18   1  -0.8528  1.0353  0.9744  11.00000  0.05    0.33
Q19   1  -0.6546  1.4497  0.8267  11.00000  0.05    0.33
Q20   1  -0.4774  1.0587  0.8780  11.00000  0.05    0.33
Q21   1  -0.7168  1.4280  0.8890  11.00000  0.05    0.32
Q22   1   0.2166  0.6283  0.3777  11.00000  0.05    0.32
Q23   1  -0.7513  1.3368  0.9399  11.00000  0.05    0.32
Q24   1   0.1933  0.6576  0.3532  11.00000  0.05    0.31
Q25   1   0.2869  0.5459  0.2723  11.00000  0.05    0.31
;
_shelx_res_checksum   77313

_shelx_hkl_file
;
   0   0  -3  675.19   62.49
   0   0  -3  999.24  125.30
   0   0  -4 1145.35   73.53
   0   0   4 1486.54  100.76
   0   0  -4 1023.94   94.04
   0   0   5  -22.71   60.91
   0   0  -5  -40.73   50.16
   0   0  -5 -177.88   76.34
   0   0   6  100.49   50.55
   0   0  -6   29.61   38.88
   0   0  -6   38.14   64.62
   0   0   7  -58.72   41.40
   0   0  -7  -41.56   32.33
   0   0   7  -54.28   51.31
   0   0  -7  -69.59   51.18
   0   0   8  159.33   39.77
   0   0  -8   89.87   30.10
   0   0   8  117.20   47.64
   0   0  -8   65.33   43.00
   0   0   9   97.72   34.55
   0   0  -9   73.80   25.62
   0   0   9   72.58   46.95
   0   0  -9   56.34   36.46
   0   0  10 -110.05   33.46
   0   0  11  733.93   56.55
   0   0  11  546.43   79.19
   0   0 -11  892.79   57.43
   0   0  12  538.26   46.79
   0   0  12  624.62   40.95
   0   0 -12  686.03   44.13
   0   0  12  678.66   57.10
   0   0 -12  617.58   57.31
   0   0  12  710.73   68.12
   0   0  12  694.92   48.66
   0   0 -12  806.75   51.36
   0   0  13  216.53   36.28
   0   0  13  259.82   23.89
   0   0 -13  313.29   24.54
   0   0  13  323.20   30.59
   0   0 -13  274.97   40.04
   0   0  13  259.60   34.40
   0   0  13  265.50   24.00
   0   0 -13  357.83   25.29
   0   0  14   -1.14   26.36
   0   0  14   -6.00   21.08
   0   0 -14   -7.51   22.12
   0   0  14  -29.64   25.70
   0   0 -14  -51.24   31.06
   0   0  14  -22.02   27.83
   0   0  14  -28.20   22.81
   0   0 -14  -19.01   24.59
   0   0  15   37.02   27.01
   0   0  15   19.35   20.80
   0   0 -15   25.55   23.94
   0   0  15   52.50   27.26
   0   0 -15   21.17   30.51
   0   0  15   41.94   26.30
   0   0 -15   70.92   25.88
   0   0 -15   25.56   24.93
   0   0  16  122.60   28.60
   0   0  16  151.43   21.90
   0   0 -16  196.33   27.04
   0   0  16  208.37   29.78
   0   0  16  213.24   28.23
   0   0 -16  232.66   26.75
   0   0 -16  132.79   21.62
   0   0 -17 1069.37   67.54
   0   0  17  958.46   64.47
   0   0  17 1183.81   72.77
   0   0 -17 1306.67   73.60
   0   0  18   -0.95   29.57
   0   0 -18    4.40   27.72
   0   0  18  -21.81   27.52
   0   0  18    0.98   29.05
   0   0 -18   -0.42   27.79
   0   0  19  134.39   31.99
   0   0 -19  217.88   29.53
   0   0  19  236.57   28.83
   0   0  19  234.24   31.24
   0   0 -19  297.20   29.66
   0   0 -20  989.66   62.40
   0   0  20  947.98   59.87
   0   0 -20 1126.27   60.51
   0   0 -21   44.16   28.77
   0   0  21   34.32   25.48
   0   0  21   39.09   32.57
   0   0 -21   76.39   26.30
   0   0 -22   -9.74   27.91
   0   0  22  -33.85   26.43
   0   0  22    3.81   31.28
   0   0 -22   -1.13   23.94
   0   0 -23   58.56   28.30
   0   0 -23  126.75   27.57
   0   0  23   85.76   30.72
   0   0 -23  119.67   26.01
   0   0 -24    1.18   25.76
   0   0 -24  -29.14   26.43
   0   0  24  -17.67   26.82
   0   0 -24    7.38   24.72
   0   0 -25   12.06   24.29
   0   0 -25   26.64   24.53
   0   0  25    0.06   23.18
   0   0 -25   13.20   22.03
   0   0 -26   -1.44   24.60
   0   0 -26   -2.57   21.05
   0   1 -26   -0.68   23.88
   0  -1  26   -2.70   23.28
   0   1 -26   14.31   22.53
   0   1 -25   25.37   23.91
   0  -1  25   21.14   25.88
   0   1 -25   33.22   22.55
   0   1 -24    1.84   23.65
   0   1 -24   27.41   23.36
   0  -1  24   33.15   26.64
   0   1 -24   31.35   25.03
   0   1 -23   10.25   24.80
   0  -1  23   -3.62   27.89
   0   1 -23   32.44   26.13
   0  -1  22   48.69   34.30
   0   1 -22   76.27   27.20
   0  -1  22   66.99   30.11
   0   1 -22   74.82   25.42
   0  -1  21    1.07   37.81
   0   1 -21   23.33   29.17
   0  -1  21   27.56   23.77
   0  -1  21   33.70   28.78
   0   1 -21   59.57   26.95
   0  -1  20  186.37   39.70
   0   1 -20  256.57   29.52
   0  -1  20  255.83   26.29
   0  -1  20  324.39   31.34
   0   1 -20  327.45   29.35
   0  -1  19  570.67   55.91
   0   1 -19  767.11   50.03
   0  -1  19  735.35   46.94
   0  -1  19  979.91   60.94
   0  -1  18  378.00   36.47
   0   1 -18  431.71   31.39
   0  -1  18  459.86   29.23
   0  -1  18  506.33   34.57
   0  -1  17  -14.08   32.41
   0   1 -17    2.68   25.87
   0  -1  17   17.16   26.05
   0  -1  17   23.85   28.40
   0  -1  16   -1.77   29.02
   0  -1  16    1.32   20.13
   0   1 -16   -5.85   25.00
   0  -1  16  -17.32   27.65
   0  -1  16   -1.60   27.45
   0  -1  15  -13.63   28.81
   0  -1  15   25.31   20.96
   0   1 -15   20.73   26.17
   0  -1  15   21.50   25.70
   0  -1  15   32.82   25.85
   0  -1  14   12.35   24.99
   0  -1  14   36.17   22.37
   0   1 -14   -0.56   22.44
   0  -1  14   40.56   25.86
   0  -1  14   65.69   24.42
   0  -1  13   31.94   25.62
   0  -1  13   28.86   25.48
   0   1 -13   28.02   22.56
   0  -1  13   18.80   24.09
   0  -1  13   51.56   22.76
   0  -1  12  -12.04   24.97
   0  -1  12    7.94   27.79
   0   1 -12   -8.32   22.14
   0  -1  12    9.49   24.31
   0  -1  12   23.55   24.71
   0  -1  11  119.56   32.47
   0  -1  11  135.95   27.03
   0   1  -9  371.40   56.02
   0  -1   8  346.43   40.92
   0   1  -8  257.05   41.73
   0  -1   8  358.29   44.26
   0   1  -8  248.69   53.97
   0  -1   7 1099.20   63.58
   0   1  -7 1031.35   64.88
   0  -1   7 1040.53   70.89
   0   1  -7  972.69   74.10
   0   1  -6  665.78   52.54
   0   1  -5 9700.38  150.13
   0   1  -5 9964.75  178.29
   0   1  -4 3817.91  167.29
   0   1  -3 9348.28  161.45
   0   1   3 1259.70   79.56
   0  -1  -3  827.52   69.46
   0   1   4  398.22   63.43
   0   1   4  372.36   82.89
   0   1   5  -26.86   53.98
   0  -1  -5    8.32   44.28
   0   1   5  -47.02   81.16
   0  -1  -6  -79.87   36.03
   0   1   6  117.82   77.72
   0   1   7  153.79   41.91
   0  -1  -7  126.50   33.95
   0   1   7  219.99   64.47
   0   1   8    8.32   39.58
   0  -1  -8  -24.12   27.77
   0   1   8   60.20   52.42
   0   1   9  -59.48   33.37
   0  -1  -9    5.32   25.25
   0   1   9  -38.72   45.20
   0   1  10  406.19   36.58
   0   1  10  262.57   72.68
   0   1  11  885.48   61.94
   0  -1 -11  898.18   56.07
   0   1  11  757.28   70.25
   0  -1 -11  855.11   53.92
   0   1  12  363.77   28.29
   0  -1 -12  358.29   23.29
   0   1  12  339.90   34.75
   0  -1 -12  362.62   43.16
   0   1  12  369.73   48.20
   0   1  12  356.40   31.22
   0  -1 -12  421.68   27.37
   0   1  13  455.65   31.23
   0  -1 -13  530.26   31.01
   0   1  13  549.72   43.93
   0  -1 -13  500.25   47.99
   0   1  13  475.17   49.76
   0   1  13  566.07   38.45
   0  -1 -13  658.05   37.51
   0   1  14  343.38   27.16
   0  -1 -14  358.29   25.14
   0   1  14  358.15   52.81
   0  -1 -14  327.28   42.63
   0   1  14  253.89   45.12
   0   1  14  440.37   32.10
   0  -1 -14  415.37   29.40
   0  -1 -14  393.47   31.69
   0   1  15    9.09   21.62
   0  -1 -15    6.67   24.18
   0   1  15  -14.99   28.04
   0  -1 -15   52.31   34.13
   0   1  15   -9.61   29.61
   0   1  15    1.93   24.56
   0  -1 -15   41.65   25.01
   0  -1 -15   14.60   24.64
   0   1  16  244.90   26.40
   0  -1 -16  381.35   28.69
   0   1  16  379.19   34.65
   0  -1 -16  362.51   61.56
   0   1  16  203.13   36.61
   0   1  16  333.07   31.09
   0  -1 -16  409.27   28.87
   0  -1 -16  315.17   28.83
   0  -1 -17   95.63   28.18
   0   1  17  102.65   30.48
   0  -1 -17   19.01   38.80
   0   1  17  144.78   28.82
   0  -1 -17  153.38   27.06
   0  -1 -18  456.33   34.86
   0   1  18  391.38   32.63
   0   1  18  483.41   35.65
   0  -1 -18  454.39   33.24
   0  -1 -19   36.89   28.84
   0   1  19   12.79   29.46
   0   1  19   22.97   29.73
   0  -1 -19   27.51   27.19
   0  -1 -20   86.57   29.48
   0   1  20   54.66   28.17
   0   1  20   99.93   30.92
   0  -1 -20   81.72   26.76
   0  -1 -21  304.80   33.28
   0   1  21  290.73   31.32
   0   1  21  351.30   36.65
   0  -1 -21  233.88   27.37
   0  -1 -22    2.88   28.78
   0   1  22   20.56   26.76
   0   1  22   -0.10   30.84
   0  -1 -22   39.11   25.63
   0  -1 -23    9.19   26.84
   0  -1 -23   17.07   27.25
   0   1  23   -4.25   29.72
   0  -1 -23   21.85   25.25
   0  -1 -24   16.17   25.42
   0  -1 -24   -2.35   26.02
   0   1  24    7.10   26.00
   0  -1 -24   22.36   22.89
   0  -1 -25  -12.96   25.12
   0  -1 -25    6.31   26.18
   0   1  25   16.43   22.74
   0  -1 -25    7.96   23.10
   0  -1 -26   -0.07   25.32
   0  -1 -26   -3.11   25.11
   0  -1 -26   11.45   22.00
   0  -2  25    0.28   25.04
   0  -2  24   36.46   24.42
   0  -2  23   53.91   36.22
   0  -2  23    7.89   26.28
   0  -2  22  222.36   40.74
   0   2 -22  135.94   24.90
   0  -2  22  241.52   29.17
   0  -2  21  -14.32   39.09
   0   2 -21    8.72   25.07
   0  -2  21  -14.78   23.39
   0  -2  21   11.09   29.67
   0  -2  20  131.03   40.19
   0   2 -20   70.55   27.92
   0  -2  20  110.85   23.87
   0  -2  20  138.09   28.64
   0  -2  19  256.45   40.59
   0   2 -19  221.97   27.79
   0  -2  19  261.38   26.45
   0  -2  19  331.54   31.11
   0   2 -19  376.81   30.79
   0  -2  18  158.65   35.30
   0   2 -18  142.75   27.29
   0  -2  18  153.75   25.91
   0  -2  18  215.96   30.62
   0   2 -18  275.59   29.85
   0  -2  17   36.18   31.92
   0   2 -17   71.36   28.67
   0  -2  17   79.29   25.17
   0  -2  17   60.49   29.49
   0   2 -17  131.73   28.72
   0  -2  16  -11.10   29.58
   0   2 -16    9.49   26.22
   0  -2  16   19.01   24.67
   0  -2  16   44.43   28.10
   0   2 -16   20.62   27.15
   0  -2  15    8.33   29.20
   0  -2  15    2.08   21.36
   0   2 -15  -16.19   24.91
   0  -2  15  -22.60   24.49
   0  -2  15  -46.27   27.68
   0   2 -15  -41.22   25.46
   0  -2  14  -22.60   25.37
   0  -2  14  -13.20   22.72
   0   2 -14   -4.86   23.70
   0  -2  14  -11.91   24.69
   0  -2  14   13.80   26.72
   0   2 -14  -21.99   24.68
   0  -2  13  -17.09   23.01
   0  -2  13   10.15   24.61
   0   2 -13  -11.72   23.85
   0  -2  13   11.57   22.14
   0  -2  13   35.44   25.45
   0   2 -13   22.79   24.23
   0  -2  12   17.71   24.24
   0  -2  12   35.83   28.55
   0   2 -12   16.64   21.73
   0  -2  12   35.80   23.54
   0  -2  12   59.00   27.18
   0   2 -12   22.02   22.94
   0  -2  11    0.24   22.24
   0  -2  11  -67.16   29.07
   0  -2  11  -13.26   26.06
   0  -2  11  -25.73   24.75
   0   2 -11  -21.54   20.68
   0  -2  10  172.88   42.19
   0  -2  10  160.25   29.59
   0  -2   9   73.98   39.74
   0   2  -8 1540.74  114.81
   0   2  -7   33.69   30.02
   0   2  -7   33.03   45.59
   0   2  -6 7117.80  198.43
   0   2  -512267.15  226.13
   0  -2   2214772.1  572.27
   0  -2   1 3836.16  162.61
   0   2  -1 3359.86  143.40
   0   2   0 9844.08  131.73
   0   2   010217.31  255.65
   0   2   0 9311.99  269.64
   0   2   1 5495.59  150.87
   0  -2  -1 6050.79  173.28
   0   2   2 1638.40  101.95
   0   2   3  200.87   74.76
   0  -2  -3  212.83   64.24
   0   2   4  878.95   72.48
   0  -2  -4  747.70   61.12
   0  -2  -4 1020.29   67.08
   0   2   5  352.18   48.62
   0  -2  -5  224.07   46.04
   0   2   6   46.82   42.70
   0  -2  -6   31.79   30.70
   0   2   6  109.00   55.99
   0   2   7  -17.07   38.71
   0  -2  -7  -21.14   28.37
   0   2   7   54.76   56.42
   0   2   8  310.55   38.38
   0  -2  -8  252.12   41.30
   0   2   8  288.97   56.75
   0   2   9 4554.18  190.03
   0  -2  -9 3839.99  173.45
   0   2   9 4578.16  255.39
   0   2  10 3424.90  156.45
   0   2  10 3228.94  185.66
   0   2  11 2843.53  127.80
   0   2  11 2267.61  103.57
   0  -2 -11 2390.66  107.31
   0   2  11 2171.43  133.11
   0   2  11 2635.53  113.26
   0  -2 -11 2436.92   97.97
   0   2  12   68.93   26.52
   0   2  12   86.76   26.70
   0  -2 -12   83.98   24.55
   0   2  12   77.38   36.34
   0   2  12   96.67   24.84
   0  -2 -12  132.18   23.39
   0  -2 -12   88.64   31.46
   0   2  13   16.79   22.74
   0   2  13   20.01   27.07
   0  -2 -13    9.05   26.44
   0   2  13   33.05   33.25
   0   2  13   26.86   23.25
   0  -2 -13   29.29   23.28
   0  -2 -13   35.69   26.19
   0   2  14   70.13   21.68
   0  -2 -14  113.63   24.57
   0  -2 -14   41.54   27.87
   0   2  14   50.73   29.92
   0   2  14   55.93   25.19
   0  -2 -14   91.94   23.51
   0  -2 -14   75.10   27.44
   0   2  15   65.27   20.97
   0  -2 -15   70.49   25.63
   0   2  15   54.78   28.31
   0  -2 -15   36.27   32.39
   0   2  15   44.28   30.88
   0  -2 -15   75.99   25.74
   0  -2 -15   60.85   25.30
   0   2  16  -15.61   20.25
   0  -2 -16  -41.45   26.45
   0   2  16   -4.15   31.35
   0  -2 -16  -50.67   32.76
   0   2  16  -12.31   28.86
   0  -2 -16   19.62   25.33
   0  -2 -16  -11.04   21.59
   0  -2 -17  315.92   29.88
   0   2  17  312.37   36.32
   0  -2 -17  339.72   39.14
   0   2  17  288.37   32.23
   0  -2 -17  319.72   27.93
   0  -2 -18  851.69   33.61
   0   2  18  884.82   44.11
   0  -2 -18  669.69   57.31
   0   2  18  928.56   40.61
   0  -2 -18  684.30   39.52
   0  -2 -19  -14.51   28.46
   0   2  19    0.10   31.78
   0  -2 -19  -33.64   36.38
   0   2  19  -14.18   30.26
   0  -2 -19   34.42   25.02
   0  -2 -20   33.73   29.64
   0   2  20    9.23   30.97
   0   2  20   12.43   31.91
   0  -2 -20   73.13   25.56
   0  -2 -21  236.92   30.34
   0   2  21  252.58   32.33
   0  -2 -21  221.96   29.66
   0   2  21  245.32   34.20
   0  -2 -21  175.65   25.53
   0  -2 -22   14.73   29.22
   0   2  22   35.43   28.33
   0  -2 -22   15.84   27.58
   0   2  22   22.41   31.56
   0  -2 -22   61.33   24.70
   0  -2 -23   -3.83   26.43
   0  -2 -23  -15.95   27.13
   0  -2 -23   30.97   24.12
   0  -2 -24    4.01   25.92
   0  -2 -24   23.73   26.78
   0   2  24    4.26   23.96
   0  -2 -24    9.96   23.52
   0  -2 -25    3.58   26.12
   0  -2 -25    1.55   25.73
   0  -2 -25    2.40   22.54
   0  -2 -26   10.58   25.99
   0  -2 -26   77.49   24.60
   0  -2 -26   62.32   20.11
   0   3 -25    3.61   25.11
   0  -3  25   12.74   29.32
   0  -3  25  -11.18   26.14
   0   3 -25   14.40   24.30
   0  -3  24   78.29   32.12
   0   3 -24   89.76   24.45
   0  -3  24   64.46   26.55
   0   3 -24   72.54   24.96
   0  -3  23  -29.31   38.14
   0  -3  23  -19.44   25.47
   0   3 -23   33.93   27.31
   0  -3  22    0.32   39.05
   0  -3  22   24.26   26.42
   0   3 -22   50.05   27.74
   0  -3  21   12.53   41.99
   0  -3  21   42.28   25.04
   0  -3  21   35.81   26.03
   0   3 -21   28.47   26.50
   0  -3  20   77.05   42.39
   0  -3  20   68.78   24.31
   0  -3  20  123.25   29.99
   0   3 -20  114.79   28.44
   0  -3  19   -3.35   38.10
   0  -3  19   12.79   26.55
   0  -3  19  -13.31   28.27
   0   3 -19   -8.83   28.14
   0  -3  18   48.55   37.46
   0  -3  18  112.60   25.12
   0  -3  18  108.61   29.41
   0   3 -18  112.39   25.82
   0  -3  17  -27.70   33.51
   0  -3  17  -25.75   24.76
   0  -3  17  -22.90   26.33
   0   3 -17    1.73   29.29
   0  -3  16  -19.96   30.99
   0  -3  16  -15.61   23.46
   0  -3  16   26.28   29.47
   0   3 -16    7.77   26.38
   0  -3  15   -9.92   28.24
   0  -3  15  -11.83   21.18
   0  -3  15   -0.91   25.15
   0  -3  15  -16.00   30.78
   0   3 -15  -27.30   26.89
   0  -3  14   80.40   26.35
   0  -3  14   85.00   21.04
   0  -3  14  135.55   25.74
   0  -3  14   78.45   23.12
   0  -3  14  144.47   29.45
   0   3 -14  168.30   24.64
   0  -3  13   13.78   23.88
   0  -3  13    8.86   23.98
   0  -3  13   22.48   24.06
   0  -3  13   36.96   22.26
   0  -3  13   11.92   27.80
   0   3 -13   28.40   22.80
   0  -3  12   -0.22   24.70
   0  -3  12   40.56   26.50
   0  -3  12   39.05   21.86
   0  -3  12   10.24   21.73
   0  -3  12   72.06   28.86
   0   3 -12   34.86   20.44
   0  -3  11 1020.56   70.22
   0  -3  11  872.19   60.18
   0  -3  11 1075.82   70.42
   0  -3  10  423.87   26.34
   0  -3  10  634.97   43.62
   0  -3  10  535.86   35.24
   0   3 -10  595.32   31.36
   0   3  -7 1604.17  127.81
   0   3  -6  -36.46   43.47
   0  -3   5 6964.84  147.78
   0  -3   4 3206.31  148.03
   0   3  -4 3338.93  143.41
   0  -3   3  847.74   65.79
   0   3  -3  819.44   62.58
   0  -3   2 1681.31   95.70
   0   3  -2 1658.39   83.44
   0   3  -122760.50  257.21
   0   3  -121407.55  416.78
   0   3   0 1521.42   79.24
   0   3   0 1482.50  124.49
   0   3   1 5274.75  221.41
   0   3   1 4694.02  256.57
   0   3   2 2062.61  137.78
   0  -3  -2 1866.40  114.15
   0  -3  -2 2692.64  268.05
   0   3   3  486.66   54.64
   0  -3  -3  518.19   70.16
   0  -3  -3  475.44   55.77
   0   3   4  -32.89   49.44
   0  -3  -4   27.40   39.05
   0  -3  -4  -42.29   39.27
   0   3   5  -29.10   43.66
   0  -3  -5   -5.45   34.90
   0  -3  -5  -70.64   36.15
   0   3   6  101.39   39.71
   0  -3  -6   53.65   28.54
   0  -3  -6  108.83   32.72
   0   3   7  464.98   51.67
   0  -3  -7  385.79   36.43
   0  -3  -7  431.32   35.29
   0   3   8   66.85   38.20
   0  -3  -8   16.10   25.26
   0   3   9   37.25   33.18
   0   3   9   72.24   47.79
   0  -3  -9  123.98   34.53
   0   3  10 3133.26  142.73
   0  -3 -10 2747.88  102.79
   0  -3 -10 2326.19  120.50
   0  -3 -10 2571.72  112.96
   0   3  10 2749.86  157.29
   0  -3 -10 2605.73  117.17
   0   3  11 1013.82   71.87
   0  -3 -11 1065.35   63.65
   0   3  11  890.08   69.58
   0  -3 -11  851.54   63.37
   0   3  11  878.10   86.84
   0   3  11  902.35   67.21
   0  -3 -11  811.88   61.56
   0  -3 -11  899.49   75.83
   0   3  12   -7.35   23.79
   0  -3 -12   -3.46   24.11
   0   3  12   -8.44   27.88
   0  -3 -12  -13.89   23.24
   0   3  12  -27.06   36.64
   0   3  12  -24.64   25.38
   0  -3 -12    3.25   20.89
   0  -3 -12   12.33   25.24
   0   3  13   17.24   23.11
   0  -3 -13   37.24   23.80
   0   3  13   36.05   30.01
   0  -3 -13   20.24   25.48
   0   3  13   12.72   41.49
   0  -3 -13   74.88   24.35
   0  -3 -13   26.43   24.68
   0   3  14   -2.62   23.60
   0   3  14  -25.10   31.47
   0  -3 -14   17.76   28.45
   0   3  14   26.51   32.24
   0   3  14  -26.26   26.42
   0  -3 -14   36.25   21.98
   0  -3 -14   17.56   23.92
   0   3  15   -4.81   21.52
   0   3  15   -9.98   32.74
   0  -3 -15   14.78   30.92
   0   3  15   11.08   28.53
   0   3  15    7.27   28.48
   0  -3 -15   52.69   24.82
   0  -3 -15   12.86   25.42
   0   3  16  -38.72   34.77
   0  -3 -16   -1.36   32.67
   0   3  16  -24.55   32.59
   0  -3 -16   10.13   23.35
   0   3  17  114.24   35.61
   0  -3 -17   63.08   37.75
   0   3  17  133.21   32.10
   0  -3 -17  138.77   26.22
   0   3  18   22.61   34.86
   0  -3 -18  -21.41   38.54
   0   3  18  -12.44   29.46
   0  -3 -18   12.45   26.18
   0  -3 -19  297.91   28.08
   0   3  19  334.82   38.73
   0  -3 -19  235.55   28.76
   0  -3 -19  303.62   40.90
   0   3  19  338.26   33.30
   0  -3 -19  307.36   27.64
   0  -3 -20  217.21   30.09
   0   3  20  178.90   33.46
   0  -3 -20  149.68   31.01
   0  -3 -20  147.03   38.07
   0   3  20  158.95   32.39
   0  -3 -20  162.04   26.20
   0  -3 -21   68.22   27.67
   0   3  21   18.08   31.27
   0  -3 -21   36.16   28.86
   0   3  21   18.04   30.96
   0  -3 -21   22.21   26.42
   0  -3 -22    8.39   26.45
   0   3  22   20.15   27.73
   0  -3 -22  -27.46   27.05
   0   3  22   16.53   29.96
   0  -3 -22  -13.75   23.79
   0  -3 -23    6.29   27.59
   0  -3 -23   38.38   25.77
   0   3  23   23.97   26.35
   0  -3 -23   -1.57   23.04
   0  -3 -24    1.11   26.20
   0  -3 -24   16.86   25.23
   0  -3 -24    1.61   21.10
   0  -3 -25    8.51   25.85
   0  -4  24   28.44   33.41
   0   4 -24   20.93   25.67
   0  -4  24   23.27   27.97
   0  -4  24   15.44   26.88
   0   4 -24    9.91   24.44
   0  -4  23   -6.87   38.18
   0   4 -23   12.97   25.38
   0  -4  23    3.42   31.88
   0  -4  23    5.88   25.11
   0   4 -23  -17.50   24.85
   0  -4  22   85.92   40.60
   0  -4  22   60.27   26.78
   0   4 -22   52.24   26.61
   0  -4  21  -56.59   41.60
   0  -4  21  -21.38   27.56
   0   4 -21    1.91   27.76
   0  -4  20    2.07   39.36
   0  -4  20  -19.85   24.28
   0  -4  20   -7.10   25.76
   0   4 -20   -9.16   28.53
   0  -4  19   29.57   39.00
   0  -4  19   60.74   26.53
   0  -4  19   82.11   30.14
   0   4 -19   86.34   29.58
   0  -4  18   -5.91   37.21
   0  -4  18   27.24   25.57
   0  -4  18   42.90   28.09
   0   4 -18  -22.30   27.49
   0  -4  17  108.22   36.14
   0  -4  17  102.74   26.89
   0  -4  17  116.93   29.39
   0   4 -17  132.20   27.39
   0  -4  16  -27.89   33.08
   0  -4  16    1.66   24.97
   0  -4  16   -8.19   30.50
   0  -4  16   20.93   26.55
   0   4 -16   19.14   28.42
   0  -4  15   67.04   30.83
   0  -4  15   67.30   28.00
   0  -4  15   33.91   34.07
   0  -4  15   95.39   29.55
   0   4 -15   75.63   25.72
   0  -4  14  100.14   29.15
   0  -4  14   84.88   20.65
   0  -4  14  128.28   25.73
   0  -4  14  131.15   28.39
   0  -4  14  148.67   26.52
   0   4 -14  147.72   26.40
   0  -4  13   17.12   25.88
   0  -4  13   -6.90   23.09
   0  -4  13    4.28   24.71
   0  -4  13   -9.42   25.75
   0  -4  13    3.10   27.49
   0   4 -13   -4.60   22.22
   0  -4  12  186.91   25.11
   0  -4  12  185.07   23.95
   0   4 -12  188.72   22.22
   0  -4  11  121.84   23.49
   0  -4  11  118.29   22.25
   0   4 -11  135.45   22.32
   0  -4  10    9.16   22.14
   0  -4  10    3.69   22.19
   0   4 -10   -3.20   19.98
   0  -4   9   -3.23   22.86
   0  -4   9   -7.22   24.10
   0  -4   9   -1.88   21.87
   0   4  -9    7.31   19.20
   0  -4   8 1834.05   75.31
   0  -4   8 2184.98   89.02
   0  -4   8 2210.11   89.64
   0  -4   8 2219.94   97.99
   0  -4   7 5812.97  140.41
   0  -4   6 1195.57   83.42
   0  -4   5  610.69   59.99
   0  -4   4 2434.51  150.60
   0   4  -4 2263.52  120.51
   0  -4   3 3110.60  191.35
   0   4  -3 3141.06  144.29
   0   4  -2  582.59   52.07
   0   4  -2  633.12   88.66
   0   4  -1 1497.88   98.54
   0   4  -1 1584.48  145.63
   0   4  -1 1703.17  124.09
   0   4   0  911.43   79.23
   0   4   0  754.87   96.20
   0   4   0  723.59  101.93
   0   4   1  194.84   45.61
   0   4   1  154.35   52.05
   0   4   2  386.22   50.96
   0   4   2  375.21   50.48
   0   4   3  594.28   69.89
   0  -4  -3  563.17   61.81
   0   4   4  233.31   53.16
   0  -4  -4  172.61   37.86
   0  -4  -4  234.72   51.78
   0   4   5  147.18   43.29
   0  -4  -5  158.56   32.06
   0  -4  -5  103.73   37.43
   0   4   6  151.84   38.54
   0  -4  -6   95.08   29.89
   0  -4  -6  242.37   48.49
   0   4   7 2112.94  120.68
   0  -4  -7 1872.50  123.15
   0   4   8  528.99   41.57
   0  -4  -8  370.43   36.29
   0   4   8  387.07   48.38
   0  -4  -8  439.12   36.94
   0  -4  -8  366.40   41.13
   0   4   9  -18.43   31.97
   0  -4  -9   19.09   22.61
   0  -4  -9    2.92   30.10
   0  -4  -9    0.66   24.60
   0   4   9  -61.47   44.88
   0  -4  -9    4.15   22.69
   0   4   9   12.69   23.80
   0  -4  -9  -21.18   24.17
   0   4  10  -15.70   27.25
   0  -4 -10    0.76   22.79
   0  -4 -10    4.56   26.88
   0  -4 -10   17.25   23.83
   0   4  10    1.93   43.84
   0   4  10   13.85   23.91
   0  -4 -10    2.22   22.43
   0   4  11    3.65   25.91
   0  -4 -11    4.11   21.99
   0  -4 -11   21.93   30.02
   0  -4 -11   10.31   22.29
   0   4  11   -9.56   41.22
   0   4  11    6.74   25.21
   0  -4 -11   21.81   21.59
   0   4  12  328.91   29.82
   0  -4 -12  389.57   30.84
   0   4  12  308.48   33.51
   0  -4 -12  347.79   32.13
   0   4  12  312.99   42.23
   0   4  12  414.00   39.09
   0  -4 -12  277.24   31.41
   0   4  13  470.71   38.36
   0  -4 -13  537.33   33.49
   0   4  13  432.21   41.53
   0  -4 -13  494.59   42.46
   0   4  13  357.73   46.88
   0   4  13  494.33   44.32
   0   4  14   13.08   23.36
   0  -4 -14   36.10   23.02
   0   4  14   25.71   32.55
   0  -4 -14   -5.05   26.57
   0   4  14   15.32   34.19
   0   4  14   58.85   31.20
   0  -4 -14   30.62   22.29
   0   4  15   -4.84   23.93
   0  -4 -15   16.31   26.16
   0   4  15   25.18   36.60
   0  -4 -15   -9.90   29.46
   0   4  15   14.92   31.83
   0  -4 -15   42.18   22.93
   0  -4 -16   17.88   27.44
   0   4  16  -17.72   35.50
   0  -4 -16    4.39   24.45
   0  -4 -16  -19.86   32.40
   0   4  16   -1.64   31.25
   0  -4 -16   22.50   25.34
   0  -4 -17  158.59   27.54
   0   4  17  156.08   36.56
   0  -4 -17  130.79   28.01
   0  -4 -17  112.38   37.64
   0   4  17  179.90   32.24
   0  -4 -17  107.38   24.88
   0   4  18   64.07   38.20
   0  -4 -18   42.08   26.09
   0  -4 -18   85.24   39.42
   0   4  18   28.14   31.66
   0  -4 -18   51.56   25.87
   0   4  19  466.32   45.09
   0  -4 -19  326.86   38.76
   0  -4 -19  456.78   50.63
   0   4  19  417.18   38.68
   0  -4 -19  356.80   36.05
   0   4  20   26.19   36.17
   0  -4 -20   12.43   24.58
   0  -4 -20    5.47   36.80
   0   4  20   18.75   29.49
   0  -4 -20   24.72   23.53
   0   4  21   11.26   31.81
   0  -4 -21    8.94   27.07
   0  -4 -21    0.44   36.12
   0   4  21  -17.68   27.63
   0  -4 -21    8.68   21.88
   0   4  22   16.08   29.17
   0  -4 -24   34.80   27.37
   0  -4 -25   23.22   25.85
   0   5 -24   39.33   19.22
   0   5 -24   43.43   22.55
   0  -5  24   27.66   24.91
   0  -5  24   58.44   30.00
   0   5 -24   33.88   22.44
   0  -5  23  -16.91   34.74
   0   5 -23   13.99   22.30
   0  -5  23   12.96   26.69
   0  -5  23  -10.62   29.42
   0   5 -23   -6.72   22.13
   0  -5  22   26.03   40.24
   0   5 -22   15.40   23.83
   0  -5  22   25.27   27.36
   0  -5  22   46.58   27.93
   0   5 -22   17.35   25.82
   0  -5  21  -13.42   39.99
   0  -5  21    9.87   30.22
   0  -5  21  -12.53   25.96
   0   5 -21  -15.19   24.61
   0  -5  20   24.47   41.73
   0  -5  20   -4.79   25.16
   0  -5  20   17.77   30.44
   0  -5  20   -2.68   28.62
   0   5 -20  -20.80   26.51
   0  -5  19  -25.28   37.65
   0  -5  19   17.82   25.55
   0  -5  19    6.52   27.76
   0   5 -19   30.53   27.12
   0  -5  18   36.27   37.97
   0  -5  18   17.04   26.59
   0  -5  18   26.70   28.34
   0   5 -18   -1.50   27.99
   0  -5  17   25.38   40.25
   0  -5  17   28.73   27.25
   0  -5  17   43.22   29.54
   0   5 -17   -8.14   27.81
   0  -5  16  139.03   36.21
   0  -5  16  115.11   28.87
   0  -5  16   60.79   33.81
   0  -5  16   90.21   29.55
   0   5 -16   67.00   25.78
   0  -5  15  143.70   29.68
   0  -5  15  110.36   32.69
   0   5 -15   98.08   27.74
   0  -5  14   11.91   27.71
   0  -5  14   21.71   31.11
   0   5 -14   22.51   26.51
   0  -5  13  137.72   28.34
   0  -5  13   87.97   27.65
   0   5 -13  105.96   25.34
   0  -5  12  161.97   29.98
   0  -5  12   97.52   28.08
   0   5 -12  119.32   22.76
   0  -5  11   22.26   28.33
   0  -5  11   21.50   26.77
   0  -5  11   55.62   23.32
   0   5 -11   39.81   22.17
   0  -5  10   37.44   28.04
   0  -5  10   62.19   24.54
   0  -5  10   56.29   25.89
   0  -5  10   70.33   26.44
   0   5 -10   40.58   20.59
   0  -5   9    3.18   27.01
   0  -5   9   41.72   25.08
   0  -5   9   38.29   27.05
   0  -5   9   16.13   20.80
   0  -5   9   27.89   24.50
   0   5  -9   14.60   18.69
   0  -5   8  358.87   28.76
   0  -5   8  467.71   40.50
   0  -5   8  527.32   37.18
   0  -5   8  393.73   23.02
   0  -5   8  395.20   33.79
   0  -5   7  553.27   29.99
   0  -5   7  655.57   58.96
   0  -5   7  628.35   33.11
   0  -5   7  588.57   41.77
   0  -5   6  554.17   37.21
   0  -5   6  628.96   52.02
   0  -5   6  771.22   57.51
   0  -5   6  533.33   37.01
   0  -5   5   47.29   30.80
   0  -5   5   25.21   28.09
   0  -5   5   25.00   25.31
   0   5  -4  254.95   55.43
   0  -5   4  187.24   34.70
   0   5  -3 2466.91  160.73
   0   5  -3 2623.82  176.86
   0   5  -2  488.55   67.52
   0   5  -2  461.00   60.14
   0   5  -1 2120.55  152.13
   0   5   0  255.75   56.00
   0   5   1  265.82   56.40
   0   5   2   61.91   40.45
   0   5   3  414.01   43.34
   0   5   4   44.22   36.78
   0   5   5  -12.18   37.93
   0  -5  -5  -35.50   31.26
   0   5   6   85.68   36.65
   0  -5  -6  100.07   32.36
   0  -5  -6   92.79   19.14
   0  -5  -6  119.51   28.75
   0   5   7  111.35   31.40
   0  -5  -7  122.75   20.73
   0  -5  -7  117.32   30.92
   0  -5  -7  117.87   19.89
   0  -5  -7   85.31   29.67
   0  -5  -7  110.27   27.99
   0   5   8  537.25   39.69
   0  -5  -8  609.82   28.23
   0  -5  -8  639.44   61.48
   0  -5  -8  495.44   33.16
   0  -5  -8  419.00   40.18
   0   5   9  106.85   27.32
   0  -5  -9  102.58   22.73
   0  -5  -9   93.19   33.09
   0   5   9   85.43   35.71
   0  -5  -9  111.87   24.48
   0  -5  -9   93.93   28.18
   0   5  10   79.61   25.57
   0  -5 -10   72.19   23.51
   0  -5 -10   64.01   30.87
   0  -5 -10   90.30   25.77
   0   5  10   44.50   37.23
   0  -5 -10   52.68   32.68
   0   5  10   41.64   25.70
   0   5  11  224.18   26.58
   0  -5 -11  201.92   24.40
   0  -5 -11  194.90   31.92
   0  -5 -11  202.96   26.80
   0   5  11  158.61   38.34
   0   5  11  159.67   35.93
   0   5  12   61.76   24.36
   0  -5 -12   13.50   23.94
   0  -5 -12   22.68   32.11
   0  -5 -12   20.19   25.97
   0   5  12   52.67   36.00
   0   5  12   19.72   26.57
   0   5  13   16.90   25.13
   0  -5 -13   -3.78   25.07
   0   5  13  -23.65   34.17
   0  -5 -13  -26.21   27.02
   0   5  13    3.22   33.48
   0   5  13   -9.94   30.21
   0  -5 -14   53.33   26.57
   0   5  14   58.12   35.42
   0  -5 -14   28.14   28.55
   0  -5 -15  219.46   25.70
   0   5  15  257.84   38.27
   0  -5 -15  271.84   35.02
   0   5  15  244.82   33.49
   0  -5 -16  493.59   30.37
   0   5  16  524.29   40.67
   0  -5 -16  554.74   40.20
   0   5  16  512.40   36.02
   0  -5 -17   15.81   27.87
   0   5  17   15.24   39.45
   0  -5 -17   32.15   37.17
   0   5  17  -35.43   29.82
   0  -5 -18   23.53   27.96
   0   5  18   -9.52   35.68
   0  -5 -18   45.37   39.30
   0   5  18    9.33   46.17
   0  -5 -19   20.14   27.44
   0   5  19  -21.41   36.22
   0  -5 -19   -9.56   39.23
   0   5  19  -14.64   27.82
   0  -5 -20  114.88   26.86
   0   5  20  130.16   36.26
   0  -5 -20   93.05   37.74
   0   5  20   98.83   26.64
   0  -5 -21   37.67   25.93
   0   5  21   19.15   31.49
   0  -5 -21   30.23   36.16
   0  -5 -22   26.95   28.27
   0   5  22   23.84   27.15
   0  -5 -23  -10.52   26.16
   0   6 -23   -9.45   20.39
   0  -6  23   18.25   22.39
   0  -6  23   21.78   31.50
   0  -6  22   -7.64   33.36
   0   6 -22   20.37   22.05
   0  -6  22    9.87   25.17
   0  -6  22    8.05   31.14
   0   6 -22    4.55   22.17
   0  -6  21   30.38   37.13
   0   6 -21   27.31   21.54
   0  -6  21   50.37   26.55
   0  -6  21   53.81   30.46
   0   6 -21   31.61   22.63
   0  -6  20   -8.41   39.29
   0  -6  20   -3.45   26.19
   0  -6  20    0.69   28.04
   0  -6  19  158.22   41.14
   0  -6  19   92.21   24.21
   0  -6  19  107.80   28.86
   0  -6  19  163.63   31.24
   0   6 -19   99.28   26.03
   0  -6  18   -9.75   24.78
   0  -6  18   -0.16   29.07
   0   6 -18  -11.06   26.15
   0  -6  17  173.51   28.75
   0  -6  17  163.63   31.10
   0   6 -17  133.55   26.75
   0  -6  16   50.48   29.94
   0  -6  16   46.97   30.69
   0   6 -16   40.98   26.21
   0  -6  15   -2.95   30.65
   0  -6  15    7.35   32.50
   0  -6  15   -0.94   30.99
   0   6 -15   -2.15   25.23
   0  -6  14  -20.43   35.63
   0  -6  14  -19.54   29.11
   0  -6  14  -30.15   31.02
   0  -6  14   28.98   28.73
   0   6 -14   -6.02   24.49
   0  -6  13    8.57   36.03
   0  -6  13  -15.72   31.95
   0  -6  13    3.15   29.61
   0  -6  13   31.09   29.51
   0   6 -13    9.33   25.15
   0  -6  12   40.55   35.57
   0  -6  12   21.81   29.45
   0  -6  12    5.53   27.61
   0  -6  12   44.52   28.43
   0  -6  12   62.77   29.76
   0   6 -12    2.26   22.29
   0  -6  11   -3.62   33.83
   0  -6  11   29.51   22.38
   0  -6  11   21.10   29.92
   0  -6  11    6.00   25.59
   0  -6  11    3.81   27.43
   0  -6  11   23.85   27.62
   0  -6  10  -17.09   33.10
   0  -6  10  -14.05   23.01
   0  -6  10  -15.60   28.75
   0  -6  10  -43.94   21.98
   0  -6  10  -15.54   25.76
   0  -6  10  -11.47   27.19
   0  -6   9   12.51   32.16
   0  -6   9   27.68   21.24
   0  -6   9   21.44   28.52
   0  -6   9   42.06   22.58
   0  -6   9   12.41   24.17
   0  -6   9   11.96   25.58
   0  -6   8   -8.40   30.64
   0  -6   8   10.87   23.79
   0  -6   8   14.25   27.53
   0  -6   8   50.36   21.64
   0  -6   8    3.64   22.63
   0  -6   8   24.69   24.78
   0  -6   7  128.50   29.92
   0   6  -7  134.65   30.95
   0  -6   7  175.52   27.85
   0  -6   7  114.78   23.84
   0  -6   7  124.44   25.94
   0  -6   6    1.93   30.30
   0   6  -6   59.68   31.27
   0  -6   6   26.90   26.46
   0  -6   6  -16.85   20.27
   0  -6   6   -0.82   26.90
   0  -6   5   10.90   29.25
   0   6  -5    4.78   33.16
   0  -6   5  -10.99   28.04
   0  -6   5  -18.46   21.83
   0  -6   5    0.07   28.03
   0  -6   4   97.74   28.63
   0   6  -4  155.87   39.19
   0  -6   4  136.58   29.25
   0  -6   4  156.89   22.69
   0  -6   4  140.99   33.08
   0  -6   3  504.66   55.77
   0   6  -3  741.84   73.40
   0  -6   3  794.78   66.87
   0  -6   3  631.84   23.57
   0  -6   3  646.39   65.83
   0   6  -2 1334.36  121.29
   0  -6   2 1155.38   83.46
   0  -6   2 1063.58   59.08
   0  -6   2 1152.14   93.95
   0  -6   2 1077.00   99.54
   0   6  -1  704.55   71.85
   0  -6   1  633.86   50.05
   0  -6   1  546.78   25.41
   0  -6   1  647.78   70.82
   0  -6   1  615.33   68.51
   0   6   0  860.00   81.26
   0  -6   0  840.52   50.68
   0  -6   0  873.63   82.86
   0  -6   0  793.98   86.22
   0   6   1 2046.76  129.08
   0  -6  -1 2184.22  114.69
   0  -6  -1 1667.97   98.91
   0   6   2 1431.72   95.61
   0  -6  -2 1304.07   96.02
   0  -6  -2  849.60   78.48
   0   6   3   46.78   33.05
   0  -6  -3   47.32   28.53
   0  -6  -3   48.70   19.25
   0  -6  -3   18.54   21.55
   0   6   4   -9.05   29.36
   0  -6  -4   17.69   31.39
   0  -6  -4   -5.25   17.92
   0  -6  -4   -1.11   21.47
   0   6   5  149.90   28.83
   0  -6  -5  208.50   34.77
   0  -6  -5  138.03   17.33
   0  -6  -5   92.89   24.87
   0   6   6   68.02   27.84
   0  -6  -6   89.12   20.80
   0  -6  -6  107.34   32.78
   0  -6  -6   80.48   18.96
   0  -6  -6   51.70   27.09
   0   6   7   94.42   24.45
   0  -6  -7  115.04   23.02
   0  -6  -7  123.66   36.29
   0  -6  -7   78.39   19.03
   0  -6  -7   65.74   27.58
   0   6   8   10.70   24.78
   0  -6  -8    6.18   24.03
   0  -6  -8   27.76   33.86
   0  -6  -8   18.47   20.80
   0  -6  -8   13.20   31.31
   0   6   9   14.84   24.09
   0  -6  -9   31.02   23.82
   0  -6  -9  -23.14   33.59
   0   6   9    9.10   30.97
   0  -6  -9   -4.55   23.52
   0  -6  -9  -33.88   30.13
   0   6  10   69.92   23.77
   0  -6 -10   78.98   25.28
   0  -6 -10   44.49   33.72
   0  -6 -10   60.95   28.06
   0   6  10   25.80   33.32
   0  -6 -10   37.94   26.16
   0   6  10   65.30   27.14
   0   6  11   66.37   23.01
   0  -6 -11   79.84   24.62
   0  -6 -11  115.73   34.40
   0  -6 -11   95.28   27.85
   0   6  11   65.26   34.70
   0   6  11   77.69   27.62
   0  -6 -12   -2.03   25.20
   0  -6 -12   13.86   34.83
   0  -6 -12   17.80   28.36
   0   6  12   31.20   29.71
   0  -6 -13  173.28   26.94
   0   6  13  185.51   37.47
   0  -6 -13  139.46   29.78
   0   6  13  114.84   31.50
   0  -6 -14  409.64   29.51
   0   6  14  417.09   40.36
   0  -6 -14  338.69   34.22
   0   6  14  370.98   38.43
   0  -6 -15   17.15   27.95
   0   6  15  -23.97   36.50
   0  -6 -15  -17.81   32.51
   0   6  15    1.72   30.18
   0  -6 -16  106.96   28.45
   0   6  16  112.23   40.79
   0  -6 -16   55.96   31.74
   0   6  16   60.96   33.96
   0  -6 -17   10.15   28.10
   0   6  17  -25.60   36.82
   0  -6 -17    2.67   34.09
   0   6  17  -25.00   28.16
   0  -6 -18   -3.88   27.56
   0   6  18  -42.21   37.35
   0  -6 -18  -52.20   37.19
   0   6  18    9.76   28.08
   0  -6 -19   -4.01   27.09
   0   6  19  -15.09   34.98
   0  -6 -19  -25.90   36.06
   0  -6 -20    5.99   28.55
   0   6  20   -6.57   33.42
   0  -6 -20  -22.81   36.94
   0  -6 -21   -7.44   28.26
   0   6  21   21.44   30.22
   0  -6 -21   -0.36   33.50
   0  -6 -22   21.82   26.58
   0  -6 -23   74.82   26.84
   0   7 -22   39.05   23.66
   0  -7  22   87.81   30.72
   0  -7  21   -1.46   20.30
   0  -7  21   37.63   34.13
   0  -7  20   25.41   22.08
   0  -7  19  -12.56   20.66
   0   7 -19    5.71   22.57
   0  -7  19    3.97   24.25
   0  -7  18  184.61   25.15
   0  -7  18  155.87   26.05
   0  -7  17  119.92   36.69
   0  -7  17  107.05   25.34
   0  -7  17   95.92   25.13
   0  -7  16  -39.64   37.22
   0  -7  16  -16.47   27.74
   0  -7  16   -6.18   26.07
   0  -7  15   63.93   39.53
   0  -7  15   86.49   30.02
   0  -7  15   39.97   26.88
   0  -7  14   68.21   43.92
   0  -7  14  103.37   31.89
   0  -7  14   38.96   33.27
   0  -7  14   30.16   26.94
   0  -7  14   88.42   32.88
   0  -7  13   79.70   36.56
   0  -7  13   91.57   33.34
   0  -7  13   71.43   31.39
   0  -7  13   56.20   27.44
   0  -7  13  107.86   34.10
   0  -7  12  -16.21   42.74
   0  -7  12   -9.43   30.91
   0  -7  12  -28.16   29.36
   0  -7  12   -4.73   26.19
   0  -7  12   12.02   33.43
   0  -7  11    2.73   35.95
   0  -7  11   19.76   33.63
   0  -7  11   -9.97   25.29
   0  -7  11   12.63   25.72
   0  -7  11   41.28   33.05
   0  -7  10   -9.81   37.95
   0  -7  10   -2.97   31.11
   0  -7  10   17.21   26.70
   0  -7  10   27.13   26.30
   0  -7  10   40.58   32.27
   0  -7   9    1.21   35.98
   0  -7   9   17.75   30.70
   0  -7   9    0.58   25.08
   0  -7   9    7.55   31.31
   0  -7   8  -15.56   34.19
   0   7  -8    4.18   29.24
   0  -7   8   -3.25   29.58
   0  -7   8    2.64   31.33
   0  -7   7  377.14   42.83
   0   7  -7  371.02   35.72
   0  -7   7  456.51   35.28
   0  -7   7  314.89   25.55
   0  -7   7  401.90   35.07
   0  -7   6  -20.07   32.75
   0   7  -6   -4.60   29.32
   0  -7   6  -56.80   30.17
   0  -7   6  -25.66   23.60
   0  -7   6  -36.48   31.14
   0  -7   5   28.37   30.42
   0   7  -5   44.23   30.91
   0  -7   5   22.58   27.15
   0  -7   5   47.89   22.76
   0  -7   5   25.37   31.87
   0  -7   4   -5.96   27.76
   0   7  -4   18.49   31.29
   0  -7   4   21.08   27.07
   0  -7   4  -18.01   24.68
   0  -7   4  -29.03   27.83
   0  -7   4   -4.98   31.76
   0  -7   3  275.04   39.53
   0   7  -3  370.92   40.98
   0  -7   3  415.31   34.47
   0  -7   3  398.04   27.49
   0  -7   3  412.95   45.51
   0  -7   3  378.02   45.76
   0   7  -2   89.94   32.01
   0  -7   2   90.87   28.19
   0  -7   2   90.22   22.61
   0  -7   2   76.50   33.24
   0  -7   2   71.81   34.59
   0   7  -1   21.10   30.41
   0  -7   1   -6.43   27.60
   0  -7   1  -20.23   21.08
   0  -7   1  -23.67   24.19
   0  -7   1  -15.89   28.87
   0   7   0  -15.22   28.94
   0  -7   0  -10.52   22.21
   0  -7   0   -9.33   21.41
   0  -7   0  -13.32   26.59
   0   7   1   13.10   29.37
   0  -7  -1  -13.17   22.62
   0  -7  -1  -12.86   20.35
   0  -7  -1  -17.10   23.39
   0   7   2   38.57   26.11
   0  -7  -2   34.46   19.33
   0  -7  -2  -11.10   22.98
   0   7   3   -4.94   24.48
   0  -7  -3   20.17   18.68
   0  -7  -3   -3.19   20.89
   0   7   4   62.43   26.08
   0  -7  -4  108.88   33.91
   0  -7  -4   87.35   18.76
   0  -7  -4  102.71   26.15
   0   7   5   43.77   25.38
   0  -7  -5   20.57   34.09
   0  -7  -5    9.44   19.12
   0  -7  -5   14.04   26.54
   0   7   6   70.80   24.05
   0  -7  -6  117.64   35.50
   0  -7  -6   59.87   21.48
   0  -7  -6   53.61   29.92
   0   7   7   82.65   21.98
   0  -7  -7  105.98   23.73
   0  -7  -7  102.19   36.64
   0  -7  -7  105.19   23.57
   0  -7  -7   66.04   32.65
   0   7   8    2.34   22.23
   0  -7  -8    6.39   22.82
   0  -7  -8   25.81   36.05
   0  -7  -8   19.41   23.47
   0  -7  -8   60.19   33.06
   0   7   9  429.46   39.19
   0  -7  -9  476.95   42.99
   0  -7  -9  492.22   54.42
   0   7   9  342.78   33.10
   0  -7  -9  439.33   41.30
   0  -7  -9  345.29   41.25
   0  -7 -10  382.52   31.70
   0  -7 -10  373.98   42.74
   0  -7 -10  438.70   38.23
   0  -7 -10  385.78   31.17
   0   7  10  313.51   30.81
   0  -7 -11  125.48   27.72
   0  -7 -11  170.63   37.77
   0  -7 -11  139.94   31.00
   0   7  11   97.20   28.85
   0  -7 -12    5.63   27.93
   0  -7 -12  -42.66   36.74
   0  -7 -12  -10.72   29.83
   0   7  12   -9.93   28.72
   0  -7 -13  155.63   27.61
   0  -7 -13  174.05   30.95
   0   7  13  135.33   32.37
   0  -7 -14  371.12   32.18
   0   7  14  362.67   42.05
   0  -7 -14  421.84   38.66
   0   7  14  313.67   34.19
   0  -7 -15   41.97   29.67
   0   7  15   -2.51   39.49
   0  -7 -15   19.82   30.23
   0   7  15   11.86   28.96
   0  -7 -16  359.61   35.23
   0   7  16  442.13   46.23
   0  -7 -16  270.09   32.59
   0   7  16  262.63   28.75
   0  -7 -17   -1.12   28.66
   0   7  17  -52.73   37.20
   0  -7 -17  -20.53   34.49
   0  -7 -18  -12.25   28.55
   0   7  18   18.11   36.33
   0  -7 -18   -0.46   34.97
   0  -7 -19  -12.73   28.53
   0   7  19  -14.18   33.19
   0  -7 -19  -34.37   36.19
   0  -7 -20   27.15   26.99
   0   7  20   30.71   30.95
   0  -7 -20   30.37   34.13
   0  -7 -21   -3.26   27.93
   0   7  21    9.62   27.32
   0  -7 -21   -1.97   29.85
   0  -7 -22    3.99   25.83
   0   8 -19   17.15   21.83
   0  -8  18   38.77   34.24
   0  -8  18   11.16   19.92
   0   8 -18    0.64   25.77
   0  -8  17   -6.51   35.24
   0  -8  17    5.17   23.24
   0   8 -17    7.57   26.96
   0  -8  17   13.55   33.49
   0  -8  16    9.88   34.55
   0  -8  16  -13.04   25.37
   0  -8  16   28.65   34.09
   0  -8  15   34.91   36.76
   0  -8  15    7.89   25.91
   0  -8  15   38.57   21.77
   0  -8  15   33.57   34.73
   0  -8  14   38.09   42.12
   0  -8  14  -19.52   28.48
   0  -8  14   23.59   22.41
   0  -8  14  -13.19   36.14
   0  -8  13    3.29   38.80
   0  -8  13  -54.57   28.47
   0  -8  13    8.34   36.58
   0  -8  12  235.29   41.17
   0  -8  12  319.86   32.21
   0  -8  12  316.83   32.62
   0  -8  12  301.77   38.72
   0  -8  11  292.95   40.95
   0  -8  11  346.09   32.57
   0  -8  11  357.06   32.57
   0  -8  11  369.75   39.95
   0  -8  10   22.22   37.44
   0  -8  10  -25.53   35.10
   0  -8  10  -27.27   37.90
   0  -8   9  318.14   38.00
   0  -8   9  351.00   44.27
   0  -8   9  376.78   40.00
   0  -8   8  405.69   37.67
   0  -8   8  591.44   44.17
   0  -8   8  620.17   39.90
   0  -8   8  592.35   46.74
   0  -8   8  529.92   42.19
   0  -8   7  342.16   36.09
   0  -8   7  368.61   42.75
   0  -8   7  426.76   30.76
   0  -8   7  409.12   46.26
   0  -8   7  406.97   43.44
   0  -8   6   86.01   31.62
   0  -8   6   71.04   36.10
   0  -8   6  122.86   28.38
   0  -8   6   77.40   30.88
   0  -8   6   88.98   37.72
   0  -8   5  -24.85   28.27
   0  -8   5    6.94   28.89
   0  -8   5   -5.22   27.75
   0  -8   5  -21.28   28.80
   0  -8   5   33.83   35.35
   0   8  -4   44.17   22.34
   0   8  -4   40.77   29.19
   0  -8   4   21.11   31.43
   0  -8   4    9.61   30.05
   0  -8   4   23.30   28.69
   0  -8   4   -8.32   34.17
   0   8  -3   24.22   22.38
   0   8  -3    5.44   29.68
   0  -8   3   27.07   28.57
   0  -8   3   15.45   26.21
   0  -8   3    4.76   27.32
   0  -8   3   -0.17   32.74
   0   8  -2   14.47   27.52
   0  -8   2   18.72   29.84
   0  -8   2   74.06   28.57
   0  -8   2   45.50   28.20
   0  -8   2   33.83   33.45
   0   8  -1  268.00   42.25
   0  -8   1  341.94   40.81
   0  -8   1  303.56   29.71
   0  -8   1  311.00   36.59
   0  -8   1  190.55   33.20
   0   8   0   42.60   26.01
   0  -8   0   56.23   22.80
   0  -8   0   58.57   28.21
   0   8   1  148.76   29.45
   0  -8  -1  144.77   24.08
   0  -8  -1   97.44   24.79
   0   8   2  102.75   26.00
   0  -8  -2  125.31   22.00
   0  -8  -2   77.95   23.73
   0   8   3   74.29   24.74
   0  -8  -3   76.98   20.62
   0  -8  -3   53.49   24.65
   0   8   4    2.31   21.54
   0  -8  -4  -25.66   38.68
   0  -8  -4  -11.67   20.49
   0  -8  -4  -20.96   25.74
   0   8   5   16.97   21.10
   0  -8  -5   -7.53   37.24
   0  -8  -5   -0.37   21.03
   0  -8  -5  -11.85   30.90
   0  -8  -6   92.02   38.50
   0  -8  -6   33.70   22.75
   0  -8  -6   27.55   34.54
   0  -8  -7  387.52   40.44
   0  -8  -7  382.21   29.11
   0  -8  -7  331.49   38.34
   0  -8  -8   18.47   35.20
   0  -8  -8   26.96   26.46
   0  -8  -8    6.82   35.47
   0  -8  -9 1144.11   57.63
   0  -8  -9 1498.18   72.33
   0  -8  -9 1461.30   61.51
   0  -8  -9 1120.28   62.69
   0  -8 -10   14.25   25.05
   0  -8 -10   24.92   37.52
   0  -8 -10   18.57   31.63
   0  -8 -10   11.25   30.63
   0   8  10   -8.41   27.39
   0  -8 -11  606.09   47.99
   0  -8 -11  669.44   54.83
   0  -8 -11  825.06   58.31
   0   8  11  583.52   43.97
   0  -8 -12 1334.91   80.74
   0  -8 -12 1404.47   85.76
   0  -8 -12 1544.42   84.75
   0   8  12 1211.68   74.77
   0  -8 -13   18.30   27.10
   0   8  13   28.57   38.25
   0  -8 -13   11.75   29.05
   0   8  13   -2.67   27.95
   0  -8 -14  103.84   27.59
   0   8  14  136.99   35.35
   0  -8 -14   97.32   29.40
   0  -8 -15   -2.24   27.91
   0   8  15   -2.89   37.12
   0  -8 -15  -49.90   30.23
   0  -8 -16   36.08   27.54
   0   8  16  -20.42   36.04
   0  -8 -16  -18.80   31.01
   0  -8 -17   15.56   28.52
   0   8  17  -36.98   35.04
   0  -8 -17  -14.70   31.54
   0  -8 -18   18.11   27.57
   0   8  18   -6.48   31.47
   0  -8 -18   17.80   33.96
   0  -8 -19  -25.82   26.90
   0   8  19   35.60   30.79
   0  -8 -19   23.46   33.16
   0  -8 -20    6.43   24.40
   0   8  20   23.23   28.15
   0  -8 -20   19.95   32.18
   0  -8 -21   23.84   24.93
   0  -9  19   21.52   28.52
   0   9 -18    8.85   24.95
   0   9 -18    2.94   23.41
   0  -9  18   18.62   31.41
   0   9 -17   36.30   27.65
   0   9 -17   51.52   26.20
   0  -9  17    4.86   36.03
   0   9 -16   15.04   26.99
   0  -9  16   -5.39   22.02
   0   9 -16   22.48   27.82
   0  -9  16   12.02   35.41
   0   9 -15    5.26   28.80
   0  -9  15  -26.16   23.80
   0  -9  15    5.89   37.24
   0  -9  14   -5.43   24.30
   0  -9  14  -30.11   34.70
   0  -9  13  -32.47   27.35
   0  -9  13   55.74   35.32
   0  -9  12   87.06   36.07
   0  -9  12  105.23   29.54
   0  -9  12  149.29   40.55
   0  -9  11   -4.58   35.08
   0  -9  11  -15.71   28.74
   0  -9  11    5.60   38.42
   0  -9  10  -67.68   31.79
   0  -9  10  -47.94   39.06
   0  -9   9  623.15   46.67
   0  -9   9  595.05   47.36
   0  -9   9  538.36   47.45
   0   9  -8  -24.93   31.46
   0   9  -7  659.43   45.11
   0  -9   7  655.82   46.00
   0  -9   7  809.87   58.79
   0  -9   7  880.53   64.34
   0   9  -6  112.50   27.47
   0  -9   6   67.33   47.94
   0  -9   6   90.79   37.04
   0   9  -5    1.98   24.39
   0  -9   5  -25.94   30.52
   0  -9   5  -18.60   27.83
   0  -9   5    8.03   38.13
   0   9  -4   51.95   23.88
   0  -9   4   99.41   30.73
   0  -9   4   93.35   28.18
   0  -9   4   37.09   33.06
   0  -9   3   45.33   31.86
   0  -9   3   45.53   28.62
   0  -9   3   23.78   30.78
   0  -9   2    1.73   31.59
   0  -9   2   -6.24   24.83
   0  -9   2    6.36   28.12
   0  -9   1   37.04   32.69
   0  -9   1   22.75   23.97
   0  -9   1   47.98   28.92
   0  -9   0  102.17   23.81
   0  -9   0   72.24   28.60
   0  -9  -1   24.39   22.98
   0  -9  -1   44.91   25.36
   0  -9  -2   25.59   22.64
   0  -9  -2   17.93   25.37
   0  -9  -3   -1.62   22.72
   0  -9  -3    0.75   29.68
   0  -9  -4  -14.03   39.12
   0  -9  -4   48.16   24.15
   0  -9  -4   25.31   30.72
   0  -9  -5   71.88   39.40
   0  -9  -5   50.23   25.30
   0  -9  -5   51.84   32.89
   0  -9  -6   97.60   40.31
   0  -9  -6   52.26   25.55
   0  -9  -6   92.41   36.40
   0  -9  -7   -5.22   39.09
   0  -9  -7   14.28   27.61
   0  -9  -7    1.82   37.40
   0  -9  -8 1483.51   91.06
   0  -9  -8 1503.87   85.33
   0  -9  -8 1297.30   90.86
   0  -9  -9 1343.19   85.44
   0  -9  -9 1643.17   92.73
   0  -9 -10   76.58   36.51
   0  -9 -10   42.68   32.82
   0   9  10   53.33   26.52
   0  -9 -11  112.92   35.70
   0  -9 -11   88.02   30.23
   0   9  11   34.30   25.54
   0  -9 -12  173.47   37.32
   0  -9 -12  183.40   32.61
   0  -9 -13    9.74   25.73
   0   9  13   29.60   36.97
   0  -9 -13   -0.65   28.28
   0  -9 -14   68.77   26.93
   0   9  14   78.95   34.14
   0  -9 -14   50.06   27.31
   0  -9 -15   45.73   25.53
   0   9  15   44.29   36.35
   0  -9 -15    9.32   29.99
   0  -9 -16   42.79   26.00
   0   9  16   20.60   33.52
   0  -9 -16   13.23   28.95
   0  -9 -17    9.43   24.79
   0   9  17   32.45   34.65
   0  -9 -17   36.09   31.91
   0  -9 -18  -13.03   23.29
   0   9  18    3.96   30.98
   0  -9 -18   13.91   31.30
   0   9  19   38.40   28.94
   0  -9 -19   -5.97   36.59
   0  10 -16   43.27   23.46
   0  10 -16   23.94   25.82
   0 -10  16   20.05   28.28
   0  10 -15   63.82   23.93
   0 -10  15   34.43   21.98
   0  10 -15   71.02   28.41
   0 -10  15   54.48   29.00
   0  10 -14   34.87   22.72
   0 -10  14   49.48   23.07
   0  10 -14   51.46   31.39
   0 -10  14   34.40   30.29
   0  10 -13   41.02   23.99
   0 -10  13   16.03   25.62
   0  10 -13   58.47   35.18
   0 -10  13   18.24   32.79
   0  10 -12   80.51   23.00
   0 -10  12   41.90   28.24
   0 -10  12   57.65   34.25
   0  10 -11  100.49   23.35
   0 -10  11  118.11   29.01
   0 -10  11   92.65   34.66
   0  10 -10  114.71   23.28
   0 -10  10  116.81   30.20
   0 -10  10  100.68   33.23
   0  10  -9   60.66   22.73
   0 -10   9    7.16   30.77
   0 -10   9   34.05   35.67
   0  10  -8   42.78   21.69
   0 -10   8  -17.49   30.98
   0 -10   8  -13.02   32.10
   0  10  -7   57.07   23.00
   0 -10   7   12.93   29.90
   0 -10   7   46.41   31.85
   0  10  -6   -1.20   22.33
   0 -10   6    7.72   30.15
   0 -10   6   57.92   31.09
   0 -10   5   17.30   31.29
   0 -10   5   16.11   24.38
   0 -10   5  -11.12   32.17
   0 -10   4   33.42   31.33
   0 -10   4   35.06   24.42
   0 -10   4   36.16   30.58
   0 -10   3   29.81   32.16
   0 -10   3   20.38   24.85
   0 -10   3   40.43   29.59
   0 -10   2   22.78   33.11
   0 -10   2   18.36   22.87
   0 -10   2   -4.60   26.48
   0 -10   1  -54.83   34.20
   0 -10   1   -6.60   24.54
   0 -10   1   17.14   26.28
   0 -10   0  421.62   40.86
   0  10   0  311.44   40.38
   0 -10   0  347.65   33.06
   0  10   1  -16.50   29.18
   0 -10  -1   37.88   22.64
   0 -10  -1   -4.89   29.79
   0 -10  -2   -7.64   23.85
   0 -10  -2  -24.38   31.22
   0 -10  -3  230.74   27.40
   0 -10  -3  185.71   34.61
   0 -10  -4  123.83   26.47
   0 -10  -4   57.01   36.48
   0 -10  -5   66.16   38.35
   0 -10  -5   72.19   27.85
   0 -10  -5   54.64   37.40
   0 -10  -6  215.42   38.56
   0 -10  -6  241.87   30.28
   0 -10  -6  176.68   37.40
   0 -10  -7 1316.63   88.94
   0 -10  -7 1570.98   93.97
   0 -10  -7 1048.08   81.88
   0 -10  -8  103.60   36.72
   0 -10  -8   71.90   34.63
   0  10   8   41.35   25.10
   0 -10  -9 1232.83   72.23
   0 -10  -9 1286.91   55.06
   0 -10 -10  177.90   34.17
   0 -10 -10  257.40   34.47
   0 -10 -11   17.01   33.17
   0 -10 -11   30.06   29.02
   0  10  12  442.88   41.33
   0 -10 -12  356.16   31.25
   0  10  13   93.19   37.10
   0 -10 -13   84.36   29.82
   0  10  14   17.81   36.40
   0 -10 -14   12.73   30.64
   0  10  15  -19.95   35.84
   0 -10 -15   -3.36   29.33
   0  10  16    5.95   32.77
   0 -10 -16  -12.36   28.45
   0  10  17   22.88   31.51
   0  11 -14    4.00   20.14
   0  11 -14   18.79   27.51
   0 -11  14   13.13   21.86
   0  11 -13   -6.56   21.12
   0 -11  13   -3.99   23.43
   0  11 -13    2.39   30.21
   0 -11  13    2.87   22.35
   0  11 -12    4.60   20.28
   0 -11  12   20.05   24.63
   0 -11  12   26.17   25.45
   0  11 -11   -3.02   20.48
   0 -11  11   13.32   26.50
   0 -11  11    9.76   26.02
   0 -11  10   48.01   29.41
   0  11 -10   78.41   36.34
   0 -11  10   26.76   25.35
   0 -11   9   76.10   28.68
   0  11  -9   92.45   37.24
   0 -11   9   47.61   26.26
   0 -11   8   21.80   30.89
   0  11  -8  -17.37   37.11
   0 -11   8  -10.43   27.21
   0 -11   7   15.34   30.82
   0  11  -7    9.52   36.81
   0 -11   7  -14.58   26.97
   0 -11   6   14.38   29.21
   0  11  -6    9.81   36.06
   0 -11   6   20.92   27.05
   0 -11   5   27.21   30.40
   0  11  -5   20.68   32.48
   0 -11   5   17.69   26.62
   0 -11   4   43.18   30.75
   0  11  -4   11.01   34.31
   0 -11   4   24.25   27.17
   0 -11   3   11.54   31.77
   0  11  -3  -13.60   31.56
   0 -11   3    4.37   26.71
   0 -11   2  118.45   34.61
   0  11  -2   52.11   28.82
   0 -11   2   65.97   27.73
   0 -11   1   24.72   32.16
   0  11  -1  -42.95   28.01
   0 -11   1  -10.19   28.91
   0 -11   0  -19.51   32.99
   0  11   0  -18.75   25.58
   0 -11   0   14.60   22.87
   0 -11   0   -3.29   29.50
   0 -11  -1   -7.60   24.37
   0 -11  -1    9.71   33.17
   0 -11  -2   -6.62   25.42
   0 -11  -2  -14.91   34.94
   0 -11  -3   11.41   26.80
   0 -11  -3    3.89   36.21
   0 -11  -4   21.42   28.29
   0 -11  -4   43.20   38.72
   0 -11  -5   11.34   37.92
   0 -11  -5    0.11   29.43
   0 -11  -5  -19.51   36.34
   0 -11  -6  701.11   41.58
   0 -11  -7  645.06   37.97
   0 -11  -7  808.69   44.51
   0 -11  -8   65.17   35.54
   0 -11  -8   40.32   30.63
   0 -11  -9  464.30   38.23
   0 -11  -9  485.47   35.12
   0 -11 -10   83.30   33.82
   0 -11 -10  102.35   31.34
   0  11  11   65.44   37.00
   0 -11 -11   73.98   31.35
   0  11  12   56.82   39.00
   0 -11 -12   53.02   27.11
   0  11  13    7.85   36.89
   0 -11 -13   16.31   27.46
   0  11  14  -28.54   35.56
   0 -11 -14   -5.83   27.12
   0  11  15   24.66   33.32
   0 -11 -15   -8.62   28.29
   0 -12  10   -1.42   24.52
   0  12 -10    1.60   29.05
   0 -12  10   -4.49   21.35
   0 -12   9    0.44   27.37
   0  12  -9  -14.88   28.92
   0 -12   9   15.35   21.82
   0 -12   8  -20.90   28.74
   0  12  -8   -7.48   29.09
   0 -12   8    0.36   22.92
   0 -12   7   -0.21   28.57
   0  12  -7  -21.23   28.39
   0 -12   7    0.09   24.61
   0 -12   6   40.51   32.02
   0  12  -6  -10.40   28.83
   0 -12   6   16.49   25.43
   0 -12   5   10.55   30.04
   0  12  -5  -26.27   27.14
   0 -12   5   18.19   27.27
   0 -12   4  -14.82   31.39
   0  12  -4   -2.63   26.10
   0 -12   4    8.33   28.29
   0 -12   3   83.88   34.35
   0  12  -3   33.41   25.49
   0 -12   3    7.14   30.97
   0 -12   2  334.41   38.12
   0  12  -2  232.88   28.45
   0 -12   2  161.91   34.13
   0 -12   1  106.63   34.11
   0 -12   1   75.62   34.08
   0 -12   0   56.82   33.41
   0 -12   0    2.65   33.14
   0 -12  -1   35.80   35.84
   0 -12  -5   72.41   33.14
   0 -12  -6  183.09   32.43
   0 -12  -7  155.74   30.81
   0 -12  -7  219.98   30.86
   0 -12  -8   20.28   32.45
   0 -12  -8   50.78   28.39
   0 -12  -9   42.23   27.04
   0  12  10  244.67   37.09
   0 -12 -10  213.50   28.17
   0  12  11  207.69   35.77
   0 -12 -11  177.06   28.25
   0 -13   4  -33.03   28.41
   0 -13   3    4.54   29.61
   0 -13   2   -4.63   28.50
   0 -13   1   -2.83   28.68
   0 -13   0   19.44   29.54
   0 -13  -1   48.91   28.20
   0 -13  -2   56.18   29.15
   0 -13  -3   16.00   28.99
   0 -13  -5  168.39   28.80
   1 -13  -4  208.76   29.51
   1 -13  -3   12.04   28.32
   1 -13  -3   10.89   28.15
   1 -13  -2   15.78   26.53
   1 -13  -2   13.88   28.96
   1 -13  -1  -17.50   26.38
   1 -13   0   11.39   25.75
   1 -13   1  -10.22   26.45
   1 -13   2    2.56   27.42
   1 -13   3   -5.81   26.24
   1 -13   3 -145.82   38.28
  -1  12  10  134.80   37.33
   1 -12 -10   93.77   24.86
  -1  12   9   87.67   36.74
   1 -12  -9   94.35   26.03
   1 -12  -8   -2.73   27.35
   1 -12  -7  147.15   31.03
   1 -12  -6  191.95   30.62
   1 -12  -5  157.50   32.22
  -1  12   5   80.29   24.49
   1 -12  -4   57.16   30.45
   1 -12  -3   55.34   32.00
   1 -12  -3   37.75   29.11
   1 -12  -3    5.23   36.92
   1 -12  -2   -3.36   31.43
   1 -12  -2    4.48   27.49
   1 -12  -2  -23.56   38.53
   1 -12  -1   53.18   31.20
   1 -12  -1   38.33   26.43
   1 -12  -1   44.00   38.87
   1 -12   0   30.46   31.65
   1 -12   0   34.20   24.97
   1 -12   0   23.69   37.66
   1 -12   1    2.40   31.54
   1 -12   1   -1.36   23.15
   1 -12   1   -2.62   32.92
   1 -12   2   -8.48   32.15
  -1  12  -2    2.98   22.74
   1 -12   2   -0.46   34.24
   1 -12   3  -17.29   30.56
  -1  12  -3    0.17   22.86
   1 -12   3   20.05   32.82
   1 -12   4  -11.92   28.87
  -1  12  -4   -0.22   24.51
   1 -12   4    9.69   28.61
   1 -12   5   20.69   30.78
  -1  12  -5   -7.37   25.09
   1 -12   5   23.93   29.45
   1 -12   6    4.59   29.22
  -1  12  -6  -24.73   27.16
   1 -12   6  -10.06   28.42
   1 -12   7  -18.83   27.35
  -1  12  -7   -1.81   27.01
   1 -12   7    6.67   25.71
   1 -12   8    6.50   26.99
  -1  12  -8  -15.31   27.80
   1 -12   8   -6.40   23.86
   1 -12   9    3.62   24.48
  -1  12  -9   -0.30   27.49
   1 -12   9    5.54   24.34
   1 -12  10    7.05   23.62
  -1  12 -10    9.39   29.15
   1 -12  10    2.06   23.21
  -1  11  14   -4.55   36.44
   1 -11 -14   10.24   25.60
  -1  11  13  -18.70   37.57
   1 -11 -13    4.57   26.11
  -1  11  12   18.05   40.20
   1 -11 -12   24.28   26.78
  -1  11  11  -27.00   38.47
   1 -11 -11    3.33   27.90
  -1  11  10   62.50   39.75
   1 -11 -10   21.62   27.33
   1 -11  -9   44.30   34.48
   1 -11  -9   35.05   30.05
  -1  11   9   20.58   24.16
   1 -11  -8   16.03   34.85
   1 -11  -8   -1.03   32.33
  -1  11   8  -19.65   25.80
   1 -11  -7   -0.94   33.64
  -1  11   7    6.85   28.10
   1 -11  -6   61.95   32.78
   1 -11  -6   26.59   38.01
   1 -11  -5   14.76   30.53
   1 -11  -5   45.50   40.36
   1 -11  -4   -0.85   31.14
   1 -11  -4  -22.20   41.15
   1 -11  -3  114.80   33.65
   1 -11  -3   76.79   27.33
   1 -11  -3   52.41   39.19
   1 -11  -2  348.48   38.10
   1 -11  -2  433.17   37.40
   1 -11  -2  279.44   41.97
   1 -11  -1  226.50   33.76
   1 -11  -1  222.06   26.12
   1 -11  -1  151.99   37.75
   1 -11   0   13.23   34.94
  -1  11   0  -20.03   25.31
   1 -11   0   11.44   24.07
   1 -11   0   38.88   33.96
   1 -11   1   24.78   34.49
  -1  11  -1   -3.00   25.36
   1 -11   1   -1.14   23.85
   1 -11   1   -1.63   31.92
   1 -11   2   99.60   31.03
  -1  11  -2   61.28   28.33
   1 -11   2  115.40   25.09
   1 -11   2   34.33   28.47
   1 -11   3   56.87   33.10
  -1  11  -3   10.35   27.83
   1 -11   3   35.05   24.37
   1 -11   3   15.99   28.67
   1 -11   4    7.52   30.64
  -1  11  -4  -32.12   30.58
   1 -11   4  -17.79   23.53
   1 -11   4   27.99   27.91
   1 -11   5  -16.47   31.68
  -1  11  -5   -4.93   31.67
   1 -11   5   -1.11   23.23
   1 -11   5  -12.80   25.06
   1 -11   6   34.15   31.39
  -1  11  -6    5.23   32.87
   1 -11   6   11.90   22.32
   1 -11   6   17.66   25.38
   1 -11   7  -28.29   29.12
  -1  11  -7  -25.78   32.22
   1 -11   7   -9.01   21.75
   1 -11   7  -12.44   25.88
   1 -11   8   -2.22   30.08
  -1  11  -8    4.36   31.51
   1 -11   8    1.68   27.41
  -1  11  -9    6.20   22.72
   1 -11   9   -0.44   28.26
  -1  11  -9   11.05   34.08
   1 -11   9   15.44   25.82
  -1  11 -10    0.33   22.75
   1 -11  10  -18.46   26.73
  -1  11 -10   -4.03   33.17
   1 -11  10   -7.29   26.69
  -1  11 -11   -2.06   22.86
   1 -11  11   -0.44   23.24
  -1  11 -11   -8.86   31.41
   1 -11  11   -0.15   25.63
  -1  11 -12    1.16   22.18
   1 -11  12   16.16   23.02
   1 -11  12   10.03   25.96
  -1  11 -13   -0.86   22.76
   1 -11  13   -1.06   23.80
  -1  11 -14   36.12   22.22
  -1  11 -14   29.47   26.47
   1 -11  14    9.51   24.77
  -1  10  16   11.42   36.11
   1 -10 -16   39.96   27.80
  -1  10  15   20.56   37.64
   1 -10 -15   10.55   27.95
  -1  10  14   -8.48   36.97
   1 -10 -14   -5.95   27.46
  -1  10  13  -26.33   39.43
   1 -10 -13   -6.97   28.14
  -1  10  12  122.12   40.20
   1 -10 -12   95.13   28.20
  -1  10  12   72.95   24.99
  -1  10  11  372.11   38.93
   1 -10 -11  307.18   31.66
  -1  10  11  260.77   28.58
   1 -10 -10   10.96   37.43
   1 -10 -10    6.25   31.18
  -1  10  10   23.21   27.44
   1 -10  -9   24.97   37.90
   1 -10  -9   23.84   32.91
  -1  10   9  -10.16   28.49
   1 -10  -8  181.62   37.23
   1 -10  -8  220.86   33.07
   1 -10  -8  210.71   32.90
  -1  10   8  141.13   29.11
   1 -10  -7  282.92   36.21
   1 -10  -7  153.75   41.35
   1 -10  -6  153.82   31.98
   1 -10  -6   74.77   42.48
   1 -10  -5  -35.62   29.32
   1 -10  -5  -46.14   41.79
   1 -10  -4   10.33   26.45
   1 -10  -4  -35.98   40.63
   1 -10  -3  222.81   38.50
   1 -10  -3  106.58   25.94
   1 -10  -3  138.94   39.34
   1 -10  -2  206.29   40.74
   1 -10  -2  135.10   25.18
   1 -10  -2  131.59   36.91
   1 -10  -1  106.71   36.12
  -1  10   1   60.82   25.28
   1 -10  -1   82.99   26.45
   1 -10  -1   36.07   31.18
   1 -10   0   26.54   35.49
  -1  10   0    3.89   27.74
   1 -10   0  -10.72   23.91
   1 -10   0   -9.91   31.44
   1 -10   1   53.48   34.21
  -1  10  -1   21.71   27.72
   1 -10   1   46.41   26.72
   1 -10   1   32.96   29.99
   1 -10   2   56.17   33.13
  -1  10  -2   70.12   31.68
   1 -10   2   74.27   27.35
   1 -10   2   22.72   27.30
   1 -10   3  -25.47   31.66
  -1  10  -3   15.47   31.98
   1 -10   3    9.29   27.60
   1 -10   3   12.48   27.79
   1 -10   4   23.00   31.15
  -1  10  -4   41.48   33.72
   1 -10   4   52.00   28.71
   1 -10   4   14.99   30.26
  -1  10  -5   42.82   25.12
   1 -10   5  -56.89   29.37
  -1  10  -5  -46.32   37.32
   1 -10   5    1.69   29.14
   1 -10   5   -2.17   31.13
  -1  10  -6    2.66   25.01
   1 -10   6   11.81   28.88
  -1  10  -6   14.22   35.26
   1 -10   6    6.94   29.01
   1 -10   6   36.57   29.76
  -1  10  -7   27.31   26.14
   1 -10   7   -1.93   28.50
  -1  10  -7  -26.63   36.07
   1 -10   7   -7.86   28.37
   1 -10   7    3.83   30.50
  -1  10  -8   30.13   24.08
   1 -10   8  -10.24   27.78
  -1  10  -8  -24.97   39.43
   1 -10   8   -5.77   27.63
   1 -10   8  -23.31   30.98
  -1  10  -9  240.07   30.55
   1 -10   9  267.82   34.44
  -1  10  -9  330.84   40.55
   1 -10   9  302.29   35.81
   1 -10   9  235.05   37.61
  -1  10 -10  324.15   27.29
   1 -10  10  348.25   29.49
   1 -10  10  372.36   33.51
   1 -10  10  303.53   34.51
  -1  10 -11  202.55   26.36
   1 -10  11  186.86   25.81
   1 -10  11  224.01   26.92
   1 -10  11  212.97   35.86
  -1  10 -12  124.87   25.66
   1 -10  12   90.61   25.16
   1 -10  12  112.44   24.26
   1 -10  12  110.35   33.25
  -1  10 -13   10.50   26.46
   1 -10  13    0.94   22.30
  -1  10 -13   38.88   32.05
   1 -10  13    3.79   34.15
  -1  10 -14   81.88   26.95
   1 -10  14   27.74   20.50
  -1  10 -14   84.83   29.86
   1 -10  14   73.25   31.79
  -1  10 -15   55.71   26.03
  -1  10 -15   48.74   28.67
   1 -10  15   44.02   29.35
  -1  10 -16   39.92   24.76
  -1  10 -16   39.86   24.16
   1 -10  16    8.65   28.97
  -1  10 -17   26.41   24.09
  -1  10 -17   10.09   22.03
   1 -10  17   16.28   25.75
   1  -9 -18   16.33   24.05
  -1   9  18  -14.98   32.92
   1  -9 -17    3.79   24.78
  -1   9  17    0.75   36.15
   1  -9 -17   13.34   29.62
   1  -9 -16   24.90   26.10
  -1   9  16  -12.88   35.84
   1  -9 -16   -2.90   29.16
   1  -9 -15  -10.96   25.93
  -1   9  15    1.24   39.42
   1  -9 -15  -43.80   28.74
   1  -9 -14   15.78   26.07
  -1   9  14   -8.16   39.06
   1  -9 -14   -8.57   27.44
  -1   9  14   25.48   27.69
   1  -9 -13   45.20   26.40
  -1   9  13   36.66   37.23
   1  -9 -13   29.38   28.84
  -1   9  13   37.38   28.74
   1  -9 -12    1.24   24.01
  -1   9  12  -24.46   38.12
   1  -9 -12  -45.90   29.44
  -1   9  12  -20.84   29.62
   1  -9 -11   62.33   24.19
   1  -9 -11  105.20   37.37
   1  -9 -11   85.03   29.24
  -1   9  11   57.20   30.98
   1  -9 -10   34.74   25.54
   1  -9 -10  -10.44   38.06
   1  -9 -10   23.12   33.36
  -1   9  10   35.50   30.04
   1  -9  -9 1175.43   70.12
   1  -9  -9 1284.87   79.68
   1  -9  -9 1395.30   79.83
  -1   9   9 1065.97   64.58
   1  -9  -8  712.04   56.62
   1  -9  -8  694.82   50.61
   1  -9  -8  565.16   56.17
   1  -9  -7  234.35   31.45
   1  -9  -7  171.09   43.93
   1  -9  -6  990.22   63.34
   1  -9  -6  650.49   60.84
   1  -9  -5   51.39   27.02
   1  -9  -5   15.67   38.32
   1  -9  -4  328.23   28.56
   1  -9  -4  314.04   39.32
   1  -9  -3  185.95   39.25
   1  -9  -3   77.86   25.28
   1  -9  -3   65.47   33.70
   1  -9  -2    0.55   37.41
   1  -9  -2  -14.61   24.75
   1  -9  -2  -37.53   29.49
   1  -9  -1  -22.21   33.45
  -1   9   1  -58.19   28.27
   1  -9  -1  -10.79   27.17
   1  -9  -1  -11.62   28.65
   1  -9   0    1.69   31.88
  -1   9   0  -21.40   30.93
   1  -9   0   16.13   26.10
   1  -9   0    4.85   30.32
   1  -9   1   -2.22   35.66
  -1   9  -1  -18.96   33.37
   1  -9   1    1.88   27.15
   1  -9   1   37.01   27.87
   1  -9   2   -1.12   32.00
   1  -9   2  -12.92   28.09
   1  -9   2  -24.83   29.12
  -1   9  -3   71.50   25.61
   1  -9   3    5.73   30.83
   1  -9   3   65.40   31.48
   1  -9   3   29.16   30.41
  -1   9  -4   62.56   26.18
   1  -9   4   21.30   30.26
   1  -9   4   80.82   32.60
   1  -9   4   70.67   32.02
  -1   9  -5   91.41   24.94
   1  -9   5   66.82   29.75
   1  -9   5  107.49   32.44
   1  -9   5   72.51   34.32
  -1   9  -6  240.49   26.36
   1  -9   6  232.71   29.91
   1  -9   6  284.34   36.72
   1  -9   6  184.72   36.42
  -1   9  -7  220.71   26.84
   1  -9   7  184.15   38.03
   1  -9   7  223.85   45.33
   1  -9   7  159.81   36.87
  -1   9  -8  510.50   38.93
   1  -9   8  547.50   41.94
   1  -9   8  678.39   54.90
   1  -9   8  566.77   51.07
  -1   9  -9   -0.93   30.12
   1  -9   9   11.99   39.41
  -1   9 -10   12.45   29.56
   1  -9  10   -1.72   26.60
   1  -9  10   13.11   32.63
   1  -9  10  -27.07   39.79
  -1   9 -11  332.72   41.98
   1  -9  11  303.83   30.23
   1  -9  11  361.05   37.42
   1  -9  11  357.36   43.02
  -1   9 -12  517.98   35.43
   1  -9  12  495.69   33.51
   1  -9  12  573.29   42.52
   1  -9  12  567.99   46.76
  -1   9 -13   30.14   29.35
   1  -9  13   19.65   24.39
   1  -9  13    9.17   27.62
   1  -9  13   38.85   38.45
  -1   9 -14   21.63   26.53
   1  -9  14    1.78   21.86
  -1   9 -14   24.80   31.14
   1  -9  14  -11.95   24.90
   1  -9  14  -30.04   40.68
  -1   9 -15    9.67   26.17
   1  -9  15    2.51   20.39
  -1   9 -15   17.34   29.70
   1  -9  15    6.39   24.02
  -1   9 -16   36.83   27.61
  -1   9 -16   23.97   25.98
  -1   9 -17    5.71   25.54
  -1   9 -17   15.41   25.67
  -1   9 -18   -2.93   26.41
  -1   9 -18    3.91   21.87
  -1   9 -19   -9.93   24.06
  -1   9 -19  -40.85   18.90
   1  -8 -20   44.68   27.37
  -1   8  20   61.32   29.75
   1  -8 -19   -2.07   27.82
  -1   8  19  -31.45   32.07
   1  -8 -18    5.36   26.25
  -1   8  18  -27.09   36.28
   1  -8 -18   -4.40   31.63
   1  -8 -17    6.16   28.58
  -1   8  17  -25.95   37.22
   1  -8 -16   25.20   27.91
  -1   8  16   -3.21   38.39
   1  -8 -16  -47.31   28.94
  -1   8  16  -18.38   28.55
   1  -8 -15    5.42   27.72
  -1   8  15   54.53   36.97
   1  -8 -15   10.41   29.97
  -1   8  15   33.71   29.33
   1  -8 -14  -13.55   25.59
  -1   8  14  -53.66   37.35
   1  -8 -14  -19.30   29.23
  -1   8  14  -13.08   29.63
   1  -8 -13  160.16   28.16
  -1   8  13  200.27   39.75
   1  -8 -13  191.70   31.03
  -1   8  13  177.53   31.63
   1  -8 -12   34.07   27.03
   1  -8 -12   -3.80   30.94
  -1   8  12   15.02   29.16
   1  -8 -11  170.97   27.95
   1  -8 -11  244.81   40.97
   1  -8 -11  185.05   33.90
  -1   8  11  159.54   30.36
   1  -8 -10  171.29   27.62
   1  -8 -10  144.57   40.31
   1  -8 -10  207.77   32.49
   1  -8 -10  216.17   35.62
  -1   8  10  129.96   29.93
   1  -8  -9   34.68   26.13
   1  -8  -9   76.98   39.39
   1  -8  -9   55.23   32.43
   1  -8  -9   50.86   40.97
   1  -8  -8  504.22   32.07
   1  -8  -8  602.46   43.51
   1  -8  -8  579.92   33.22
   1  -8  -8  461.96   42.28
   1  -8  -7   34.53   25.78
   1  -8  -7  -34.30   39.47
   1  -8  -7   -4.45   27.12
   1  -8  -7    5.69   42.41
   1  -8  -6   83.30   31.19
   1  -8  -6  118.95   38.76
   1  -8  -5  557.05   45.66
   1  -8  -5  454.96   49.98
  -1   8   4   51.77   23.37
   1  -8  -4  109.56   24.91
   1  -8  -4   82.34   32.42
  -1   8   3  593.33   49.02
   1  -8  -3  597.01   53.63
  -1   8   2   28.20   26.12
   1  -8  -2   65.53   35.57
  -1   8   2    8.24   26.01
   1  -8  -2   22.22   25.29
   1  -8  -2   -0.71   26.75
  -1   8   1   23.20   27.37
   1  -8  -1   36.58   33.54
  -1   8   1   20.91   28.64
   1  -8  -1   44.23   28.01
   1  -8  -1   24.81   27.22
  -1   8   0   23.68   25.94
   1  -8   0   31.28   32.67
   1  -8   0   34.73   26.80
   1  -8   0   26.17   27.50
  -1   8  -1   -5.95   27.02
   1  -8   1  -11.34   30.62
   1  -8   1    1.72   30.49
   1  -8   1    3.05   31.90
  -1   8  -2   14.96   22.13
  -1   8  -2    1.93   27.36
   1  -8   2  -49.11   32.29
   1  -8   2  -19.14   31.74
   1  -8   2    0.22   30.58
  -1   8  -3   17.78   22.51
  -1   8  -3   11.75   29.49
   1  -8   3  -27.94   28.98
   1  -8   3  -33.38   30.75
   1  -8   3  -19.48   32.94
  -1   8  -4    4.23   21.84
   1  -8   4   -3.80   27.94
   1  -8   4  -17.12   31.23
   1  -8   4   -5.07   34.49
  -1   8  -5  136.69   25.19
   1  -8   5  117.20   28.12
   1  -8   5  158.84   32.38
   1  -8   5   84.63   36.30
  -1   8  -6  106.94   24.24
   1  -8   6   96.45   27.48
   1  -8   6  137.56   34.68
   1  -8   6   72.26   34.06
  -1   8  -7  145.11   43.84
   1  -8   7  112.52   47.50
   1  -8   7   84.44   34.77
   1  -8   8 1011.50   83.20
   1  -8   8 1111.03   94.85
   1  -8   8 1110.03   72.39
   1  -8   8 1237.82  112.96
   1  -8   9 2679.44  100.59
   1  -8   9 2879.79   76.41
   1  -8  10  542.32   54.69
   1  -8  10  554.63   57.57
   1  -8  10  513.21   47.39
   1  -8  11  474.62   46.80
   1  -8  11  473.75   36.99
   1  -8  11  351.51   37.66
   1  -8  11  454.81   42.59
   1  -8  12  233.80   38.92
   1  -8  12  257.75   28.89
   1  -8  12  203.26   27.37
   1  -8  12  272.92   40.81
   1  -8  13   -2.32   37.57
   1  -8  13  -12.38   25.29
   1  -8  13   16.91   25.43
   1  -8  14   40.52   36.10
   1  -8  14   28.54   25.34
   1  -8  14   14.24   24.99
   1  -8  15  -28.12   34.13
   1  -8  15  -12.23   22.09
   1  -8  15  -14.47   23.69
   1  -8  16   49.32   35.35
   1  -8  16   14.89   19.83
  -1   8 -16   43.60   29.33
   1  -8  16   22.06   22.91
  -1   8 -17   45.32   26.95
  -1   8 -17    4.57   25.81
   1  -8  17  -11.78   22.89
  -1   8 -18  112.85   23.05
   1  -8  18   83.88   22.50
   1  -8  18  133.05   34.55
  -1   8 -19   50.30   20.61
   1  -8  19   43.99   20.75
   1  -8  19   88.36   34.07
   1  -8  20    1.63   32.69
   1  -7 -21   -4.66   28.16
  -1   7  21   18.73   29.61
   1  -7 -20   -0.96   30.13
  -1   7  20   -1.82   33.09
   1  -7 -19   -1.47   28.99
  -1   7  19  -19.50   33.62
   1  -7 -18   14.52   27.58
  -1   7  18  -16.26   37.72
   1  -7 -18  -11.97   34.85
  -1   7  18   28.56   25.96
   1  -7 -17   -4.43   29.28
  -1   7  17   -8.71   39.96
   1  -7 -17  -48.17   34.94
  -1   7  17   -0.24   28.88
   1  -7 -16    5.56   26.81
  -1   7  16  -22.77   41.57
   1  -7 -16  -20.89   34.08
  -1   7  16   -6.91   29.88
   1  -7 -15   21.22   27.14
  -1   7  15   12.82   42.43
   1  -7 -15  -37.28   32.07
  -1   7  15   22.45   32.48
   1  -7 -14   13.29   26.72
  -1   7  14   38.94   40.14
   1  -7 -14    1.23   30.48
  -1   7  14   35.29   33.64
   1  -7 -13   33.96   27.39
  -1   7  13   17.88   39.78
   1  -7 -13   18.60   31.66
  -1   7  13   32.13   32.99
   1  -7 -12   29.01   26.89
   1  -7 -12   -6.68   29.16
  -1   7  12   22.21   32.33
   1  -7 -11 2380.54  101.28
   1  -7 -11 2378.52  119.32
  -1   7  11 2103.71  100.95
   1  -7 -10 2418.78  102.56
   1  -7 -10 2371.35  124.15
   1  -7 -10 2807.35  132.76
   1  -7 -10 2616.92  115.32
  -1   7  10 2269.09  106.92
   1  -7  -9 1842.45  102.65
   1  -7  -9 2158.53  131.50
   1  -7  -9 2278.43  136.41
   1  -7  -9 1904.74  124.82
  -1   7   8  387.44   32.98
   1  -7  -8  424.20   30.46
   1  -7  -8  423.97   40.63
   1  -7  -8  424.87   31.04
   1  -7  -8  420.67   44.41
  -1   7   7  150.50   23.24
   1  -7  -7  139.54   23.98
   1  -7  -7  194.69   38.76
   1  -7  -7  148.84   24.86
   1  -7  -7  141.94   38.62
  -1   7   6   -1.20   24.31
   1  -7  -6    9.39   22.19
   1  -7  -6    1.90   22.96
   1  -7  -6  -43.32   38.70
  -1   7   5   64.44   24.44
   1  -7  -5   78.54   21.13
   1  -7  -5  106.82   22.61
   1  -7  -5   86.81   31.24
  -1   7   4  539.11   41.74
   1  -7  -4  637.15   46.70
   1  -7  -4  439.12   48.85
  -1   7   3   11.12   25.40
   1  -7  -3   48.35   33.70
   1  -7  -3  -27.55   23.03
   1  -7  -3  -21.55   25.49
  -1   7   2  594.89   52.72
   1  -7  -2  820.24   68.33
  -1   7   2  737.88   54.22
   1  -7  -2  799.63   62.85
  -1   7   1   80.81   28.57
   1  -7  -1  121.44   30.60
   1  -7  -1   97.60   26.22
   1  -7  -1   70.39   25.66
  -1   7   0  106.84   32.52
   1  -7   0  128.78   29.93
   1  -7   0  155.68   30.41
   1  -7   0   98.51   28.24
  -1   7  -1   34.43   20.52
  -1   7  -1   51.10   30.50
   1  -7   1   44.67   29.74
   1  -7   1   27.78   27.99
   1  -7   1   10.36   29.97
  -1   7  -2  330.73   36.12
  -1   7  -2  429.96   44.90
   1  -7   2  442.30   42.99
   1  -7   2  526.62   61.74
   1  -7   2  358.30   47.20
  -1   7  -3  381.01   35.59
  -1   7  -3  396.78   50.15
   1  -7   3  438.56   38.18
   1  -7   3  521.80   34.87
   1  -7   3  458.34   51.27
   1  -7   3  411.83   45.33
  -1   7  -4   47.79   23.98
  -1   7  -4   61.64   32.24
   1  -7   4   61.80   28.37
   1  -7   4   36.16   28.88
   1  -7   4   50.98   31.38
   1  -7   4   43.79   22.14
   1  -7   4   -3.31   34.57
   1  -7   5   38.68   30.30
  -1   7  -5   61.41   31.42
   1  -7   5   50.16   25.82
   1  -7   5   41.88   27.60
   1  -7   5   45.00   22.50
   1  -7   5   72.02   34.87
   1  -7   6   15.62   32.07
  -1   7  -6   -3.45   29.70
   1  -7   6   15.44   25.54
   1  -7   6   70.38   28.87
   1  -7   6   14.61   22.93
   1  -7   6   -6.70   34.11
   1  -7   7   24.94   32.04
  -1   7  -7   13.91   28.30
   1  -7   7   30.16   27.96
   1  -7   7   22.39   25.30
   1  -7   7    7.71   24.56
   1  -7   7   39.52   34.66
   1  -7   8  -55.23   34.94
  -1   7  -8    4.87   24.48
   1  -7   8   -4.84   24.29
   1  -7   9 1662.11   94.83
   1  -7   9 1703.52   99.85
   1  -7   9 1481.91  100.53
   1  -7   9 1834.51  112.02
   1  -7  10 1452.71   79.50
   1  -7  10 1776.59   87.62
   1  -7  10 1879.32   83.73
   1  -7  11  -13.31   35.70
   1  -7  11  -26.50   27.59
   1  -7  11    5.35   27.68
   1  -7  12   -9.82   39.24
   1  -7  12   27.16   26.40
   1  -7  12   17.61   28.25
   1  -7  13   51.91   40.47
   1  -7  13    5.64   27.09
   1  -7  13   56.93   29.18
   1  -7  14   39.14   39.81
   1  -7  14  -22.12   25.81
   1  -7  14  -19.08   29.61
   1  -7  15   30.02   37.99
   1  -7  15   21.69   24.22
   1  -7  15   36.72   29.33
   1  -7  16   27.27   22.36
   1  -7  16   27.91   28.63
   1  -7  16   88.84   34.51
  -1   7 -17   25.11   27.24
   1  -7  17   27.13   27.91
   1  -7  17   49.05   33.64
  -1   7 -18    1.42   22.88
   1  -7  18   -7.32   27.52
   1  -7  18   10.91   32.40
  -1   7 -19    3.33   21.04
   1  -7  19  -15.37   24.47
   1  -7  19   26.69   31.99
   1  -7  20   -1.91   25.08
   1  -7  20  -21.05   32.89
  -1   7 -21    6.51   22.81
   1  -7  21    3.05   22.90
   1  -7  21   32.98   33.35
  -1   7 -22   -4.34   22.13
   1  -7  22    2.56   20.89
   1  -7  22   -4.09   32.86
   1  -6 -23   18.15   28.64
   1  -6 -22    8.91   27.28
  -1   6  22    4.83   27.77
   1  -6 -21   32.98   28.28
  -1   6  21   19.35   32.18
   1  -6 -20   11.10   29.46
  -1   6  20  -20.40   32.96
  -1   6  20   11.11   25.77
   1  -6 -19   -0.69   29.14
  -1   6  19   -5.23   41.41
   1  -6 -19    3.56   35.11
  -1   6  19  -14.10   27.42
   1  -6 -18   37.14   30.03
  -1   6  18   -2.24   37.65
   1  -6 -18    8.84   35.21
  -1   6  18   18.39   31.40
   1  -6 -17  -13.84   27.06
  -1   6  17    1.47   39.63
   1  -6 -17   31.18   36.66
   1  -6 -16  136.33   28.39
  -1   6  16  199.28   44.47
   1  -6 -16  107.43   33.71
  -1   6  16  141.81   32.27
   1  -6 -15   77.19   27.84
  -1   6  15  105.44   44.81
   1  -6 -15   74.50   32.43
  -1   6  15   73.55   34.91
   1  -6 -14    7.66   27.26
  -1   6  14  -36.22   40.81
   1  -6 -14   -0.26   29.57
  -1   6  14   26.28   34.76
   1  -6 -13  131.67   29.40
  -1   6  13  101.55   40.01
   1  -6 -13   94.83   29.55
  -1   6  13  102.65   32.97
   1  -6 -12   44.07   26.19
  -1   6  12   51.42   37.63
   1  -6 -12   27.18   28.94
  -1   6  12   41.38   31.29
  -1   6  11    0.38   23.66
   1  -6 -11    3.42   25.48
   1  -6 -11    6.56   37.74
   1  -6 -11   -4.96   28.44
  -1   6  11  -14.36   35.28
   1  -6 -11    7.79   31.55
  -1   6  11    9.60   29.45
  -1   6  10   66.76   23.02
   1  -6 -10  112.05   24.71
   1  -6 -10  141.20   36.65
   1  -6 -10  150.99   31.81
  -1   6  10   82.12   34.65
   1  -6 -10  127.25   29.02
  -1   6  10  105.39   29.58
  -1   6   9   53.07   24.94
   1  -6  -9   74.24   24.80
   1  -6  -9   61.26   34.99
  -1   6   9   47.79   31.08
   1  -6  -9   48.66   26.48
   1  -6  -9   79.70   39.09
  -1   6   8   11.02   24.01
   1  -6  -8   48.13   21.50
   1  -6  -8   26.07   35.18
   1  -6  -8   10.18   23.10
   1  -6  -8  -25.38   40.17
  -1   6   7  347.15   34.25
   1  -6  -7  412.69   28.33
   1  -6  -7  427.34   40.91
   1  -6  -7  402.70   34.66
   1  -6  -7  357.25   41.80
  -1   6   6 1064.89   62.68
   1  -6  -6 1241.43   54.20
   1  -6  -6 1031.07   61.07
   1  -6  -6  930.13   67.59
  -1   6   5   90.91   27.29
   1  -6  -5  120.93   19.11
   1  -6  -5  116.75   20.14
   1  -6  -5   80.47   28.98
  -1   6   4  359.08   34.93
   1  -6  -4  389.24   23.85
   1  -6  -4  363.30   36.93
   1  -6  -4  235.34   35.79
  -1   6   3   -7.07   31.51
   1  -6  -3   25.16   29.43
   1  -6  -3   14.50   22.94
   1  -6  -3   26.67   25.44
  -1   6   2   23.69   33.15
   1  -6  -2   38.29   30.49
   1  -6  -2   15.31   25.13
   1  -6  -2   -0.28   24.91
  -1   6   1  189.41   35.39
   1  -6  -1  201.51   30.58
   1  -6  -1  196.50   32.73
   1  -6  -1  108.70   27.77
  -1   6   0  189.70   42.25
   1  -6   0  146.03   31.56
   1  -6   0   60.19   29.54
   1  -6   0   57.18   28.67
  -1   6  -1 1980.80  112.25
   1  -6   1 2142.12   96.46
   1  -6   1 2598.10   97.23
   1  -6   1 2456.15  141.81
   1  -6   1 1891.88  124.93
  -1   6  -2 2546.66  148.66
   1  -6   2 2657.60  117.68
   1  -6   2 2826.67  100.15
   1  -6   2 2689.89  140.42
   1  -6   2 2132.22  119.46
   1  -6   3  743.45   73.08
  -1   6  -3 1015.73   88.15
   1  -6   3  940.88   67.88
   1  -6   3 1066.38   59.72
   1  -6   3  691.83   66.10
   1  -6   3  851.74   76.09
  -1   6  -4 4019.76  189.20
   1  -6   4 3881.29  148.76
   1  -6   4 3823.66  169.17
   1  -6   5   68.28   31.70
   1  -6   5   63.23   24.56
   1  -6   5   45.08   21.57
   1  -6   5   57.01   37.04
   1  -6   6 2402.47   99.42
  -1   6  -6 2458.32  127.77
   1  -6   6 2564.47  112.05
   1  -6   6 2644.93   98.28
   1  -6   6 2266.77  118.26
   1  -6   6 2456.19  122.61
   1  -6   7 3980.05   96.42
   1  -6   7 4037.73   90.69
   1  -6   7 3510.11  159.74
   1  -6   7 4082.07  111.98
   1  -6   8  551.44   46.52
   1  -6   8  579.17   51.22
   1  -6   8  561.52   49.94
   1  -6   9 1588.83   81.37
   1  -6   9 1865.28   94.67
   1  -6   9 1712.19   83.28
   1  -6   9 1353.31   79.41
   1  -6  10 1125.47   52.44
   1  -6  10 1101.78   51.03
   1  -6  10 1187.62   52.77
   1  -6  10 1046.14   65.19
   1  -6  11  -15.38   36.83
  -1   6 -11   -5.23   25.22
   1  -6  11  -38.34   26.73
   1  -6  11  -32.81   30.36
   1  -6  11  -51.31   26.90
   1  -6  12   65.31   37.89
   1  -6  12   62.06   26.35
   1  -6  12   71.08   34.90
   1  -6  12   64.09   28.72
  -1   6 -12   24.07   24.07
   1  -6  13   20.90   38.40
   1  -6  13   31.57   27.27
   1  -6  13   63.54   30.37
  -1   6 -13   16.28   24.07
   1  -6  14   25.32   26.15
   1  -6  14   -9.15   30.39
   1  -6  14   62.56   34.44
  -1   6 -14  -30.13   24.60
   1  -6  15   45.48   25.96
   1  -6  15   21.02   31.74
   1  -6  15   13.16   31.07
  -1   6 -15   14.36   25.76
   1  -6  16   97.19   25.09
   1  -6  16  150.83   32.12
   1  -6  16  133.26   31.73
  -1   6 -16  111.05   26.51
   1  -6  17   45.94   38.82
   1  -6  17   -3.43   22.71
   1  -6  17   30.14   30.32
   1  -6  17  -28.99   31.48
  -1   6 -17  -37.31   25.70
   1  -6  18   -7.55   37.21
  -1   6 -18   18.29   21.79
  -1   6 -18   22.03   22.77
   1  -6  18   14.99   31.78
   1  -6  18   24.67   29.87
  -1   6 -18   16.42   25.13
   1  -6  19  -11.68   36.39
  -1   6 -19   34.92   21.59
  -1   6 -19   22.12   20.21
   1  -6  19   51.80   30.28
   1  -6  19   35.25   28.80
  -1   6 -19   30.03   25.63
   1  -6  20  -25.63   37.01
  -1   6 -20   15.52   22.39
   1  -6  20   14.93   29.08
   1  -6  20   21.12   28.71
  -1   6 -20  -10.17   24.54
   1  -6  21    4.30   35.74
  -1   6 -21   -3.84   20.98
   1  -6  21   14.27   28.84
   1  -6  21   -6.25   31.75
  -1   6 -21   -7.99   23.89
  -1   6 -22    1.15   21.47
   1  -6  22   11.85   25.99
   1  -6  22    6.26   31.42
  -1   6 -22   13.33   22.36
  -1   6 -23   -7.14   21.18
   1  -6  23    4.25   24.76
   1  -6  23   21.14   31.22
  -1   6 -23   26.25   23.01
  -1   5  23   27.29   26.12
  -1   5  22   27.24   30.49
  -1   5  22   49.26   24.87
  -1   5  21    1.37   34.50
  -1   5  21   23.19   27.05
  -1   5  20  -27.36   39.81
  -1   5  20   -3.07   28.40
   1  -5 -19   25.21   27.11
  -1   5  19  -30.94   39.38
   1  -5 -19  -24.77   34.15
  -1   5  19   -9.99   32.09
   1  -5 -18    2.79   26.59
  -1   5  18   -9.44   41.64
   1  -5 -18   15.87   38.02
  -1   5  18   21.84   31.87
   1  -5 -17  148.12   27.89
  -1   5  17  187.66   43.94
   1  -5 -17  110.24   36.33
  -1   5  17  193.10   34.88
   1  -5 -16   59.01   27.60
  -1   5  16   50.41   40.10
   1  -5 -16   16.32   33.89
  -1   5  16   54.76   35.36
   1  -5 -15   23.33   26.82
  -1   5  15   -6.63   43.95
   1  -5 -15  -14.04   31.29
  -1   5  15   31.26   35.84
   1  -5 -14    8.14   26.31
  -1   5  14  -22.70   43.10
   1  -5 -14  -42.47   30.21
  -1   5  14  -56.91   35.97
  -1   5  13  105.06   28.01
   1  -5 -13  168.11   25.54
  -1   5  13  171.75   38.10
   1  -5 -13  141.63   27.94
  -1   5  13  132.12   40.42
  -1   5  13  162.77   33.03
  -1   5  12   42.57   25.36
   1  -5 -12   60.53   26.82
  -1   5  12   66.02   35.83
   1  -5 -12   21.57   27.99
  -1   5  12   34.57   39.27
  -1   5  12   49.85   31.25
  -1   5  11  221.58   28.91
   1  -5 -11  192.74   22.44
   1  -5 -11  206.12   35.67
   1  -5 -11  222.64   28.95
  -1   5  11  160.63   40.57
  -1   5  11  208.47   30.56
  -1   5  10   12.54   25.36
   1  -5 -10    1.02   24.28
   1  -5 -10   18.75   32.67
   1  -5 -10   -0.28   25.68
  -1   5  10  -26.07   34.88
   1  -5 -10  -10.21   27.38
  -1   5  10   -9.42   28.11
  -1   5   9  172.93   26.55
   1  -5  -9  183.37   21.92
   1  -5  -9  211.41   33.09
  -1   5   9  190.07   41.45
   1  -5  -9  184.73   25.38
   1  -5  -9  124.00   34.22
  -1   5   8  156.39   30.09
   1  -5  -8  133.68   21.66
   1  -5  -8  151.09   34.57
   1  -5  -8  108.15   22.35
   1  -5  -8   88.54   38.32
  -1   5   7  331.71   33.53
   1  -5  -7  295.65   22.79
   1  -5  -7  292.78   34.82
   1  -5  -7  241.40   28.82
   1  -5  -7  278.58   41.79
  -1   5   6  377.96   41.04
   1  -5  -6  411.64   23.98
   1  -5  -6  396.64   46.06
   1  -5  -6  332.44   31.96
   1  -5  -6  318.40   38.76
  -1   5   5   10.25   36.20
   1  -5  -5   34.28   19.65
   1  -5  -5   40.78   32.31
  -1   5   4  604.71   53.22
   1  -5  -4  558.40   40.11
   1  -5  -4  346.34   43.87
  -1   5   3  114.70   39.99
   1  -5  -3  135.46   32.65
  -1   5   2  193.33   47.24
  -1   5   1   46.51   39.84
  -1   5   0 2195.74  147.19
  -1   5  -1 3164.90  194.45
  -1   5  -2  500.31   56.15
  -1   5  -3 1295.04  103.91
   1  -5   410182.41  114.75
   1  -5   4 9966.97  234.48
   1  -5   5 2486.91  113.02
   1  -5   5 2365.13   83.19
   1  -5   5 2195.86  107.50
   1  -5   6  252.44   32.85
   1  -5   6  274.67   44.86
   1  -5   6  299.19   35.61
  -1   5  -6  256.24   28.99
   1  -5   7 2902.83  116.32
   1  -5   7 3245.40  125.40
   1  -5   7 2698.64  104.57
   1  -5   7 3085.96  141.05
  -1   5  -7 3232.51  121.73
   1  -5   8 2198.18   95.05
   1  -5   8 2342.16  100.26
   1  -5   8 2280.16   99.05
   1  -5   8 2121.33  109.92
  -1   5  -8 2076.38   88.52
   1  -5   9  140.90   32.54
   1  -5   9  136.43   25.73
   1  -5   9  127.68   24.60
   1  -5   9  123.95   26.27
  -1   5  -9  123.49   22.21
  -1   5  -9  116.62   21.44
   1  -5  10   96.64   32.89
   1  -5  10   91.10   26.60
   1  -5  10   53.50   25.62
  -1   5 -10   73.68   22.44
  -1   5 -10   75.21   20.80
   1  -5  11   14.86   23.41
   1  -5  11    9.97   25.66
   1  -5  11   -0.82   27.51
   1  -5  11   20.58   24.76
  -1   5 -11   13.16   23.85
  -1   5 -11   10.84   20.23
   1  -5  12  137.08   21.55
   1  -5  12  135.33   27.08
   1  -5  12  179.67   30.90
   1  -5  12  154.12   27.33
  -1   5 -12  110.36   24.64
  -1   5 -12  133.77   20.28
   1  -5  13   48.45   21.83
   1  -5  13  -14.36   25.55
   1  -5  13   -1.57   32.49
   1  -5  13   -3.22   27.16
  -1   5 -13  -13.37   24.67
   1  -5  14   51.21   25.66
   1  -5  14   57.38   27.93
  -1   5 -14   70.11   24.53
   1  -5  15   54.84   33.53
   1  -5  15   14.52   26.05
   1  -5  15   40.14   28.51
  -1   5 -15   17.92   25.58
   1  -5  16   94.01   37.68
   1  -5  16   86.78   26.14
   1  -5  16  101.05   28.19
  -1   5 -16  115.24   26.45
   1  -5  17  -27.19   39.44
   1  -5  17  -19.79   23.57
   1  -5  17   -2.01   28.09
  -1   5 -17   -6.78   27.52
   1  -5  18   27.08   39.89
  -1   5 -18   16.60   23.00
   1  -5  18    7.39   31.76
   1  -5  18   11.19   27.48
  -1   5 -18   33.67   27.62
   1  -5  19   -9.22   39.59
   1  -5  19  -26.86   29.96
   1  -5  19   -1.91   27.04
  -1   5 -19    7.53   27.31
   1  -5  20   31.10   41.68
  -1   5 -20   30.49   24.09
   1  -5  20   73.40   29.95
   1  -5  20   44.99   27.91
  -1   5 -20   44.37   27.05
   1  -5  21  125.39   40.69
  -1   5 -21  109.15   24.65
   1  -5  21  129.55   31.44
   1  -5  21  130.17   28.07
  -1   5 -21   97.24   26.33
   1  -5  22  -11.87   35.50
  -1   5 -22   -9.24   23.55
   1  -5  22    0.13   30.64
   1  -5  22  -31.34   29.85
  -1   5 -22  -12.78   23.63
  -1   5 -23   13.56   22.75
   1  -5  23    2.63   26.62
   1  -5  23    9.95   28.36
  -1   5 -23    4.39   24.00
  -1   5 -24   23.47   18.18
  -1   5 -24   24.26   22.15
   1  -5  24   18.93   26.52
   1  -5  24   18.77   29.26
  -1   5 -24   17.12   22.13
   1  -4 -24   15.94   27.69
   1  -4 -23  -13.11   27.29
  -1   4  23   20.12   27.70
  -1   4  23    5.90   25.67
   1  -4 -22   -0.23   29.06
  -1   4  22  -24.96   31.95
  -1   4  22   18.54   28.87
   1  -4 -21   34.17   27.72
  -1   4  21  -60.24   35.90
  -1   4  21  -17.51   30.02
   1  -4 -21  -13.45   22.40
  -1   4  20  -28.80   37.26
  -1   4  20   17.32   31.07
   1  -4 -20    7.40   23.34
  -1   4  19    2.75   39.80
   1  -4 -19   14.99   33.82
  -1   4  19    8.63   32.94
   1  -4 -19   28.98   24.56
  -1   4  18  -15.94   37.88
   1  -4 -18  -11.30   36.99
  -1   4  18   41.21   34.44
   1  -4 -18   20.12   23.81
  -1   4  17    8.54   39.80
   1  -4 -17   -0.50   37.43
  -1   4  17   64.86   35.87
   1  -4 -17   60.10   24.05
  -1   4  16  -18.78   39.26
   1  -4 -16  -18.64   32.51
  -1   4  16    5.00   37.01
   1  -4 -16   32.18   23.55
  -1   4  15  168.56   39.43
   1  -4 -15  106.44   31.54
  -1   4  15  136.44   36.52
   1  -4 -15  157.39   24.58
  -1   4  14   26.74   25.38
   1  -4 -14   34.65   25.09
  -1   4  14   37.61   37.56
   1  -4 -14   -5.70   28.43
  -1   4  14   26.75   37.18
  -1   4  14   57.77   36.09
   1  -4 -14   69.87   23.30
  -1   4  13   -4.60   25.27
   1  -4 -13  -15.72   21.72
  -1   4  13    5.73   34.10
   1  -4 -13  -43.25   25.95
  -1   4  13  -28.73   31.32
  -1   4  13   32.69   31.49
   1  -4 -13   21.21   22.43
  -1   4  12   48.85   24.97
   1  -4 -12   60.12   23.32
  -1   4  12   63.69   32.03
   1  -4 -12   41.95   25.18
  -1   4  12   96.77   36.09
  -1   4  12   67.48   30.55
   1  -4 -12   95.64   23.72
  -1   4  11  -21.37   27.41
   1  -4 -11   -8.06   21.95
  -1   4  11  -20.33   31.80
   1  -4 -11  -23.79   22.39
  -1   4  11    1.25   37.75
  -1   4  11   18.90   31.64
   1  -4 -11   -6.27   22.97
  -1   4  10  268.63   31.17
   1  -4 -10  236.86   22.37
   1  -4 -10  231.14   34.93
   1  -4 -10  252.93   26.64
  -1   4  10  246.22   41.78
  -1   4  10  255.62   34.42
   1  -4 -10  209.81   29.56
  -1   4   9  251.76   32.42
   1  -4  -9  236.47   22.73
   1  -4  -9  212.74   31.01
   1  -4  -9  242.77   30.68
  -1   4   9  199.88   44.07
  -1   4   9  247.76   30.05
   1  -4  -9  197.53   26.74
  -1   4   8  -59.67   30.46
   1  -4  -8   13.34   19.13
   1  -4  -8   -3.15   29.90
   1  -4  -8  -27.90   43.72
   1  -4  -8  -77.67   25.54
  -1   4   7   33.87   33.69
   1  -4  -7   55.17   21.30
   1  -4  -7   19.08   31.90
   1  -4  -7  -32.85   21.40
   1  -4  -7    1.65   27.25
  -1   4   6 2093.38  123.37
   1  -4  -6 2065.16  118.67
  -1   4   5 1207.90   84.96
   1  -4  -5 1285.87   70.70
  -1   4   4 1225.74   85.24
   1  -4  -4 1283.81  126.44
  -1   4   3 1099.61   85.63
   1  -4  -3  960.36   67.87
  -1   4   2   15.42   43.49
   1  -4  -2  -33.66   30.32
  -1   4   1  505.93   50.45
  -1   4   1  573.19   63.12
  -1   4   0 5491.53  142.48
  -1   4   0 5097.23  260.88
  -1   4  -1 1064.27   71.40
  -1   4  -2 7847.59  176.85
  -1   4  -2 9622.02  396.72
  -1   4  -3 3941.00  173.36
  -1   4  -4 6011.10  128.74
  -1   4  -5 6914.88  128.00
   1  -4   8  756.32   52.77
   1  -4   8  857.70   56.27
   1  -4   8  829.81   50.53
   1  -4   9   81.51   28.30
   1  -4   9  124.46   24.55
   1  -4   9  104.97   22.56
  -1   4  -9  136.55   21.48
   1  -4  10  316.01   32.64
   1  -4  10  232.25   26.50
   1  -4  10  254.32   27.97
   1  -4  10  282.20   26.53
  -1   4 -10  287.26   23.16
  -1   4 -10  256.96   24.58
   1  -4  11  823.37   54.52
   1  -4  11  752.16   50.10
   1  -4  11  768.91   47.56
   1  -4  11  781.08   45.43
  -1   4 -11  740.87   39.56
  -1   4 -11  651.99   40.34
   1  -4  12   90.24   30.90
   1  -4  12  142.30   25.26
   1  -4  12  114.97   23.27
   1  -4  12  157.02   27.46
   1  -4  12  176.69   25.68
  -1   4 -12  166.92   22.71
  -1   4 -12  130.55   21.20
   1  -4  13  207.85   31.73
   1  -4  13  221.84   25.34
   1  -4  13  215.95   24.52
   1  -4  13  239.10   31.95
   1  -4  13  273.40   27.36
  -1   4 -13  267.58   24.16
  -1   4 -13  205.34   21.66
   1  -4  14  230.14   35.10
   1  -4  14  208.33   24.20
   1  -4  14  249.95   27.37
   1  -4  14  260.42   34.57
   1  -4  14  317.13   30.14
  -1   4 -14  275.77   26.82
  -1   4 -14  192.29   23.38
   1  -4  15    0.79   34.50
   1  -4  15   17.21   22.72
   1  -4  15   16.65   26.47
  -1   4 -15   16.46   24.49
   1  -4  16  -26.10   33.02
   1  -4  16   13.47   23.69
   1  -4  16   28.10   23.69
  -1   4 -16   40.72   25.86
   1  -4  17  214.45   40.01
   1  -4  17  166.77   23.32
   1  -4  17  212.65   26.91
  -1   4 -17  254.37   30.03
   1  -4  18   29.01   42.16
   1  -4  18   52.36   27.67
  -1   4 -18   56.25   26.97
   1  -4  19   47.64   42.30
   1  -4  19   41.31   24.85
  -1   4 -19   39.92   26.60
   1  -4  20   46.73   41.33
   1  -4  20   34.53   24.19
  -1   4 -20   35.49   28.48
   1  -4  21  -12.76   43.13
   1  -4  21   -8.67   23.94
  -1   4 -21   -9.63   25.50
   1  -4  22  -43.47   38.96
  -1   4 -22   -6.01   25.81
   1  -4  22   -2.68   31.77
   1  -4  22  -31.45   25.99
  -1   4 -22  -17.61   26.54
   1  -4  23  -13.63   36.77
  -1   4 -23    4.06   25.08
   1  -4  23   29.44   31.21
   1  -4  23    3.25   27.41
  -1   4 -23   -3.92   25.23
  -1   4 -24    4.05   18.09
  -1   4 -24    2.50   23.23
   1  -4  24   42.59   28.35
   1  -4  24    3.04   27.66
  -1   4 -24   -0.78   24.79
  -1   4 -25   45.07   23.15
   1  -4  25   57.75   27.80
   1  -4  25   47.89   27.96
  -1   4 -25   38.28   22.46
   1  -3 -25    8.56   26.82
   1  -3 -24   11.03   28.55
  -1   3  24   20.27   25.06
   1  -3 -24   -5.24   21.64
   1  -3 -23   -7.87   30.42
  -1   3  23   33.41   27.73
   1  -3 -23    7.77   24.87
  -1   3  23  -16.91   28.20
   1  -3 -23  -15.72   23.27
   1  -3 -22   19.10   29.92
  -1   3  22   -6.87   31.48
   1  -3 -22   16.41   26.82
  -1   3  22   14.02   31.15
   1  -3 -22   -7.21   24.53
   1  -3 -21   37.48   27.40
  -1   3  21   41.97   34.09
   1  -3 -21   46.22   26.20
  -1   3  21   13.38   32.12
   1  -3 -21   68.21   24.42
   1  -3 -20    1.83   28.36
  -1   3  20  -72.66   35.97
   1  -3 -20  -17.90   25.40
  -1   3  20    6.21   30.82
   1  -3 -20    7.93   24.74
   1  -3 -19   11.26   28.56
  -1   3  19   43.58   35.51
   1  -3 -19   -5.78   33.31
  -1   3  19  -17.97   31.79
   1  -3 -19   49.28   25.20
   1  -3 -18   -9.12   25.02
  -1   3  18   13.64   36.58
   1  -3 -18    3.81   33.92
  -1   3  18   18.06   32.65
   1  -3 -18   32.57   25.56
   1  -3 -17   38.77   27.26
  -1   3  17    2.58   36.78
   1  -3 -17    6.56   34.60
  -1   3  17   -1.51   33.10
   1  -3 -17   49.98   25.37
   1  -3 -16   96.06   24.36
  -1   3  16  136.93   41.12
   1  -3 -16   45.96   33.51
  -1   3  16   64.48   33.45
   1  -3 -16   91.64   26.21
  -1   3  15   10.55   21.79
   1  -3 -15   -5.19   30.90
  -1   3  15   47.55   32.67
   1  -3 -15   59.43   25.20
  -1   3  14  315.83   28.49
  -1   3  14  499.15   40.26
   1  -3 -14  288.18   35.78
  -1   3  14  217.87   38.80
  -1   3  14  489.68   38.62
   1  -3 -14  371.73   26.40
   1  -3 -14  274.34   30.00
  -1   3  13  174.10   25.24
  -1   3  13  199.33   33.30
   1  -3 -13  136.18   26.67
  -1   3  13  118.10   34.70
  -1   3  13  254.75   31.39
   1  -3 -13  222.74   25.60
   1  -3 -13  180.73   25.99
  -1   3  12    2.80   25.13
  -1   3  12  -39.24   30.98
   1  -3 -12   -2.73   24.03
  -1   3  12   -4.39   32.83
  -1   3  12  -39.71   28.02
   1  -3 -12   11.39   21.08
   1  -3 -12    2.09   26.96
  -1   3  11  -10.71   28.13
  -1   3  11    0.52   28.90
   1  -3 -11  -10.76   20.79
  -1   3  11  -20.39   36.31
  -1   3  11   -1.98   28.13
   1  -3 -11    6.03   21.96
  -1   3  10  150.65   31.00
   1  -3 -10  114.38   21.19
  -1   3  10  117.25   27.53
   1  -3 -10  126.38   23.99
  -1   3  10  119.13   40.47
  -1   3  10  150.35   27.96
   1  -3 -10  158.08   24.18
  -1   3   9 2561.81  115.63
   1  -3  -9 2539.05   94.36
   1  -3  -9 2381.37  118.57
  -1   3   9 2810.73  146.18
  -1   3   9 2422.31  107.20
  -1   3   8 6216.99  165.02
  -1   3   8 5264.30  266.05
  -1   3   7  186.01   44.94
  -1   3   6 1923.74  122.89
   1  -3  -6 1559.42   86.78
  -1   3   5  921.16   77.25
   1  -3  -5  799.95   71.13
  -1   3   4 2100.63  128.99
   1  -3  -4 1783.91  121.25
  -1   3   3  199.53   57.37
   1  -3  -3   81.71   37.69
  -1   3   2 1168.40   91.05
   1  -3  -2  954.25   62.64
   1  -3  -1 1582.76   99.64
  -1   3  -1 3054.73  225.86
  -1   3  -245143.62  532.46
  -1   3  -314734.44  214.98
  -1   3  -4 -140.60   36.95
  -1   3  -521225.59  319.63
  -1   3  -6 6910.12  175.14
  -1   3  -6 5893.83  139.05
   1  -3   7  -59.47   36.96
   1  -3   8  922.04   66.83
   1  -3   9   84.26   26.23
   1  -3  10 1416.62   76.70
   1  -3  10 1505.22   68.26
  -1   3 -10 1493.33   64.03
   1  -3  11   14.19   24.82
   1  -3  11   55.01   29.10
   1  -3  11   17.18   21.14
   1  -3  11   16.64   23.06
   1  -3  11   22.43   23.22
  -1   3 -11   19.17   20.22
   1  -3  12  -11.40   27.63
   1  -3  12  -23.15   25.05
  -1   3 -12   -8.17   22.50
   1  -3  12    0.18   21.13
   1  -3  12   -1.90   23.74
   1  -3  12   10.16   25.32
  -1   3 -12    9.21   20.44
  -1   3 -12  -16.54   25.02
   1  -3  13   54.40   27.47
   1  -3  13   61.04   23.64
  -1   3 -13   46.02   22.78
   1  -3  13   83.76   21.93
   1  -3  13   57.39   25.42
   1  -3  13   81.66   25.25
  -1   3 -13   75.65   22.32
  -1   3 -13   47.08   22.56
   1  -3  14    6.68   28.94
   1  -3  14   -7.04   21.44
  -1   3 -14    9.83   23.05
   1  -3  14    4.74   22.21
   1  -3  14   20.74   25.93
   1  -3  14   -5.92   25.11
  -1   3 -14   -4.89   23.25
  -1   3 -14   24.20   21.43
   1  -3  15   31.18   32.11
   1  -3  15   57.66   20.46
  -1   3 -15   63.05   24.27
   1  -3  15   85.91   21.16
   1  -3  15  122.61   27.79
  -1   3 -15  147.05   27.52
  -1   3 -15   96.54   22.81
   1  -3  16   19.27   34.44
  -1   3 -16   -7.07   24.82
   1  -3  16  -11.11   21.99
   1  -3  16  -13.76   25.48
  -1   3 -16    7.25   26.04
   1  -3  17    9.67   39.95
  -1   3 -17   19.48   25.70
   1  -3  17   -9.47   20.47
   1  -3  17    6.84   25.09
  -1   3 -17    3.64   26.69
   1  -3  18   39.32   41.37
  -1   3 -18   67.85   27.46
   1  -3  18   85.23   25.65
  -1   3 -18  129.94   28.24
   1  -3  19  120.26   46.47
  -1   3 -19   60.20   28.84
   1  -3  19   99.83   25.69
  -1   3 -19  159.84   29.02
   1  -3  20   82.01   45.66
  -1   3 -20   53.93   27.38
   1  -3  20   87.93   26.72
  -1   3 -20   82.13   28.91
   1  -3  21  -12.69   44.00
   1  -3  21    2.45   23.81
  -1   3 -21   -2.38   28.51
   1  -3  22   66.92   39.64
  -1   3 -22   67.35   25.06
   1  -3  22   61.43   25.18
  -1   3 -22   62.93   26.82
   1  -3  23   38.27   36.64
  -1   3 -23   66.28   25.99
   1  -3  23   23.79   26.26
  -1   3 -23   46.67   27.29
  -1   3 -24   15.33   23.76
   1  -3  24    2.61   31.66
   1  -3  24    8.69   26.01
  -1   3 -24   22.42   25.65
  -1   3 -25   12.93   24.04
   1  -3  25   27.98   31.98
   1  -3  25   -1.60   26.01
  -1   3 -25    4.51   23.33
   1  -2 -25   11.04   27.04
   1  -2 -25    5.83   24.10
  -1   2  25    4.19   22.35
   1  -2 -25    0.98   22.07
   1  -2 -24  -22.02   28.77
   1  -2 -24    5.50   25.79
  -1   2  24   13.99   25.77
   1  -2 -24    9.61   23.37
   1  -2 -23  -21.11   27.35
  -1   2  23   10.01   27.82
   1  -2 -23   -0.30   26.46
  -1   2  23  -11.22   30.70
   1  -2 -23   22.79   23.02
   1  -2 -22  -33.56   29.47
  -1   2  22   -8.63   28.15
   1  -2 -22  -23.36   28.63
  -1   2  22  -24.27   33.79
   1  -2 -22   29.27   25.19
   1  -2 -21   -4.63   30.27
  -1   2  21   -7.52   31.95
  -1   2  21   12.19   33.66
   1  -2 -21   21.92   25.29
   1  -2 -20    7.69   28.30
  -1   2  20    5.50   34.82
  -1   2  20   59.99   34.32
   1  -2 -20   47.52   24.16
   1  -2 -19  -16.38   28.78
  -1   2  19    9.52   35.72
  -1   2  19   -2.03   31.57
   1  -2 -19    3.91   24.93
   1  -2 -18  125.16   28.74
  -1   2  18  110.77   34.46
   1  -2 -18   87.82   33.24
   1  -2 -18  109.04   26.14
   1  -2 -17   83.92   25.32
  -1   2  17  146.01   34.23
   1  -2 -17  120.55   34.63
  -1   2  17  143.31   33.08
   1  -2 -17  164.66   26.18
   1  -2 -16  225.65   27.33
  -1   2  16  279.22   36.17
   1  -2 -16  187.76   35.57
  -1   2  16  242.41   32.23
   1  -2 -16  278.12   27.06
  -1   2  15    3.63   21.61
   1  -2 -15   -3.59   25.03
  -1   2  15   48.89   35.06
   1  -2 -15   29.58   31.58
  -1   2  15   29.40   35.52
   1  -2 -15   69.36   24.94
   1  -2 -15   -7.70   22.34
  -1   2  14   12.37   22.33
   1  -2 -14    6.41   24.01
  -1   2  14   18.68   31.00
   1  -2 -14   -3.45   29.67
  -1   2  14   13.87   30.48
  -1   2  14   23.36   29.36
   1  -2 -14   46.62   21.42
  -1   2  13  245.25   27.22
   1  -2 -13  248.49   24.15
  -1   2  13  287.36   31.49
   1  -2 -13  168.36   35.80
  -1   2  13  293.36   29.11
   1  -2 -13  263.59   24.77
  -1   2  12   25.03   27.03
   1  -2 -12   41.03   23.54
  -1   2  12   39.35   29.02
   1  -2 -12   21.77   23.37
  -1   2  12   12.23   32.37
  -1   2  12   38.80   28.45
   1  -2 -12   39.86   22.24
  -1   2  11  128.76   30.22
   1  -2 -11  128.59   21.50
  -1   2  11  122.58   30.23
   1  -2 -11   87.77   23.49
  -1   2  11  109.44   38.10
  -1   2  11  159.67   28.53
   1  -2 -11  144.49   26.39
  -1   2  10  202.84   30.96
   1  -2 -10  216.47   22.79
  -1   2  10  231.15   37.27
  -1   2  10  269.00   45.02
  -1   2  10  206.16   32.32
  -1   2   9  648.32   54.49
  -1   2   9  668.60   68.45
  -1   2   8  260.12   48.44
  -1   2   8  264.44   61.76
  -1   2   7   47.09   36.39
   1  -2  -7   20.51   26.38
  -1   2   7   51.22   49.89
  -1   2   6  111.39   39.44
   1  -2  -6   45.09   30.92
  -1   2   6   54.19   53.03
  -1   2   5  383.57   46.02
   1  -2  -5  208.81   41.43
   1  -2  -4  -80.44   38.58
   1  -2  -3  215.45   51.18
   1  -2  -2 2000.67  120.96
  -1   2  -1  415.87  107.30
  -1   2  -2 9757.88  173.22
  -1   2  -210274.78  162.07
  -1   2  -3 5143.23  214.50
  -1   2  -3 5187.05  204.25
   1  -2   4 2424.68  122.48
  -1   2  -4 2764.55   72.81
   1  -2   5   83.83   47.84
  -1   2  -5   70.38   39.32
   1  -2   6   32.13   42.93
  -1   2  -6   -6.41   35.35
  -1   2  -6   94.22   48.16
   1  -2   7 1872.96  108.52
  -1   2  -7 1612.18   96.45
  -1   2  -7 1546.57  109.20
   1  -2   8  689.61   64.62
  -1   2  -8  612.46   56.04
  -1   2  -8  558.19   74.36
   1  -2   9  336.32   39.37
   1  -2  10  316.13   34.69
   1  -2  11 1409.28   81.50
   1  -2  11 1280.37   86.94
  -1   2 -11 1347.69   57.59
   1  -2  12   -9.90   24.54
   1  -2  12   10.60   25.95
  -1   2 -12   -1.71   23.28
   1  -2  12   32.07   24.32
  -1   2 -12   20.00   20.46
   1  -2  13    8.72   23.81
   1  -2  13   49.77   25.34
  -1   2 -13   43.94   22.58
   1  -2  13   42.32   20.57
   1  -2  13   46.05   23.27
  -1   2 -13   64.30   23.23
  -1   2 -13   46.99   25.13
   1  -2  14   39.58   28.97
   1  -2  14   75.67   22.10
  -1   2 -14   80.55   25.76
   1  -2  14   68.39   21.36
   1  -2  14   95.40   23.68
  -1   2 -14  123.80   23.81
  -1   2 -14   88.95   24.08
   1  -2  15    5.97   31.59
   1  -2  15   -0.12   20.24
  -1   2 -15  -25.27   26.11
   1  -2  15    7.95   20.69
   1  -2  15    0.39   24.52
  -1   2 -15   13.40   24.27
  -1   2 -15  -17.26   22.73
   1  -2  16  -10.70   32.35
   1  -2  16    1.37   18.79
  -1   2 -16  -58.94   26.54
   1  -2  16  -19.22   20.89
   1  -2  16  -33.52   24.67
  -1   2 -16  -29.82   27.75
  -1   2 -16  -11.44   21.26
   1  -2  17  -31.18   37.40
  -1   2 -17   17.69   27.78
   1  -2  17  -35.42   20.81
   1  -2  17    6.38   25.15
  -1   2 -17   27.87   24.94
   1  -2  18   36.17   37.30
  -1   2 -18    4.88   27.53
   1  -2  18   29.48   25.38
   1  -2  19  -24.21   42.27
  -1   2 -19   -9.82   27.93
   1  -2  19    9.24   26.56
   1  -2  20   52.89   43.65
  -1   2 -20    5.41   25.82
   1  -2  20   32.77   27.21
   1  -2  21   82.05   41.44
  -1   2 -21   13.22   26.49
   1  -2  21   67.34   24.86
   1  -2  22  246.92   41.84
  -1   2 -22  160.77   28.25
   1  -2  22  249.91   29.14
   1  -2  23   94.29   35.75
  -1   2 -23   99.77   27.96
  -1   2 -23  195.58   27.67
   1  -2  23  145.00   27.44
  -1   2 -24  136.00   26.82
   1  -2  24   82.59   25.86
  -1   2 -25   22.76   25.55
   1  -2  25   20.67   24.19
  -1   2 -26   21.61   23.55
   1  -1 -25    3.38   25.80
   1  -1 -25   18.36   26.67
  -1   1  25   -5.50   24.70
   1  -1 -25   21.82   23.07
   1  -1 -24   16.67   26.03
   1  -1 -24    8.65   25.41
  -1   1  24   18.75   28.87
   1  -1 -24   27.45   25.09
   1  -1 -23    9.61   26.30
  -1   1  23    1.37   26.15
   1  -1 -23    4.07   27.22
  -1   1  23   -5.24   29.51
   1  -1 -23    1.68   24.74
   1  -1 -22   -7.45   27.08
  -1   1  22   -4.56   28.82
  -1   1  22   26.71   32.93
   1  -1 -22    4.91   25.54
   1  -1 -21  163.96   28.01
  -1   1  21  228.88   32.09
  -1   1  21  273.82   37.21
   1  -1 -21  205.02   25.36
   1  -1 -20  103.22   28.52
  -1   1  20  112.04   32.66
  -1   1  20  153.04   33.31
   1  -1 -20  116.16   25.21
   1  -1 -19   18.58   30.65
  -1   1  19    7.91   33.46
  -1   1  19   25.27   32.74
   1  -1 -19   64.64   26.43
  -1   1  18   77.39   26.86
   1  -1 -18  215.30   28.95
  -1   1  18  195.51   35.82
  -1   1  18  211.05   33.09
   1  -1 -18  194.67   27.27
  -1   1  17  109.67   28.24
   1  -1 -17  149.11   27.96
  -1   1  17  156.93   33.71
  -1   1  17  221.11   37.18
   1  -1 -17  161.70   27.44
  -1   1  16    7.95   30.68
   1  -1 -16    3.55   25.20
  -1   1  16   19.37   34.16
   1  -1 -16  -34.77   34.32
   1  -1 -16   45.21   26.38
  -1   1  15   19.01   30.84
  -1   1  15   55.26   21.17
   1  -1 -15   30.62   23.74
  -1   1  15   71.22   33.47
   1  -1 -15   29.54   33.74
  -1   1  15   91.86   31.25
   1  -1 -15  116.96   25.90
  -1   1  14   -8.80   29.21
  -1   1  14   20.23   22.23
   1  -1 -14   -7.27   22.77
  -1   1  14   13.99   30.30
   1  -1 -14  -52.85   35.70
  -1   1  14    1.47   30.23
  -1   1  13    4.84   28.07
  -1   1  13   20.62   25.37
   1  -1 -13   15.56   21.41
  -1   1  13   -7.97   28.06
   1  -1 -13   19.37   28.39
  -1   1  13   15.62   32.02
  -1   1  13   28.96   26.35
   1  -1 -13   27.80   24.68
  -1   1  12  373.56   36.33
  -1   1  12  402.92   31.58
   1  -1 -12  437.16   27.79
  -1   1  12  483.28   35.77
   1  -1 -12  324.08   41.13
  -1   1  12  318.09   48.01
  -1   1  12  473.80   38.33
   1  -1 -12  473.45   28.36
  -1   1  11   98.79   28.48
   1  -1 -11  145.68   21.39
  -1   1  11  170.07   29.81
  -1   1  11   98.77   44.66
  -1   1  11  151.22   25.84
   1  -1 -11  179.91   32.65
  -1   1  10 1524.71  105.34
  -1   1  10 1584.21   87.08
  -1   1   9  550.24   40.05
  -1   1   9  617.88   69.35
  -1   1   8  351.71   40.35
   1  -1  -8  313.61   33.82
  -1   1   7   71.45   38.82
   1  -1  -7    0.92   29.59
  -1   1   7   93.58   53.88
   1  -1  -6  754.39   56.41
  -1   1   6  735.30   71.61
   1  -1  -5  551.98   41.59
  -1   1   5  727.33   85.42
  -1   1   4 2669.90  152.74
  -1   1   0 -644.50   72.57
   1  -1   0  -65.65   91.32
  -1   1  -122025.40  383.89
  -1   1  -123310.14  433.89
   1  -1   123213.10  213.43
   1  -1   2 2687.77  134.29
  -1   1  -2 2316.13  118.57
  -1   1  -2 2286.20  115.73
   1  -1   3 6118.98  111.38
  -1   1  -3 6049.15  100.66
   1  -1   413954.13  206.32
  -1   1  -413497.21  190.95
   1  -1   5  -56.28   55.22
  -1   1  -5   48.88   46.30
   1  -1   7  912.96   62.57
  -1   1  -7  831.62   58.16
   1  -1   7  912.86   73.78
  -1   1  -7  849.46   78.73
   1  -1   8  959.19   43.17
  -1   1  -8  903.97   73.94
   1  -1   8  966.43   86.20
  -1   1  -8  920.07   82.33
   1  -1   9 1946.25  105.22
  -1   1  -9 1709.34  100.81
  -1   1  -9 1832.44  140.15
   1  -1  10  -88.63   34.63
   1  -1  11  140.48   32.15
   1  -1  12    4.47   22.92
   1  -1  12  -10.61   27.26
  -1   1 -12  -10.65   25.47
  -1   1 -12  -20.18   26.52
   1  -1  12    0.31   22.83
   1  -1  13   11.13   24.33
   1  -1  13   10.35   24.53
  -1   1 -13   44.72   24.25
   1  -1  13   27.42   21.17
   1  -1  13   33.57   22.72
   1  -1  14  -18.83   25.67
   1  -1  14   -7.98   21.01
  -1   1 -14  -22.58   25.16
   1  -1  14   -4.12   19.82
   1  -1  14   -1.10   21.48
   1  -1  15   79.46   29.45
   1  -1  15   97.54   20.61
  -1   1 -15  107.50   25.61
   1  -1  15  127.96   22.65
   1  -1  15  134.22   23.41
   1  -1  16  -17.40   28.89
   1  -1  16   17.66   18.87
  -1   1 -16   38.05   25.98
   1  -1  16   37.33   20.65
   1  -1  16   57.80   23.79
   1  -1  17   33.63   34.62
  -1   1 -17   64.31   26.81
   1  -1  17   13.56   21.79
   1  -1  17   57.39   25.11
   1  -1  18   42.39   36.65
  -1   1 -18   37.55   27.47
   1  -1  18   51.80   26.09
  -1   1 -18   66.83   28.53
   1  -1  19  -18.15   37.26
  -1   1 -19   17.14   29.29
   1  -1  19    7.62   26.53
  -1   1 -19   24.14   29.03
   1  -1  20  -23.70   38.12
  -1   1 -20    0.48   27.15
   1  -1  20   26.21   28.48
  -1   1 -20   58.13   29.73
   1  -1  21   -8.03   37.21
  -1   1 -21   -1.09   28.13
   1  -1  21    4.21   27.58
  -1   1 -21    1.93   27.69
  -1   1 -22   54.51   27.28
   1  -1  22   23.02   27.11
  -1   1 -22   88.98   26.19
  -1   1 -23   -4.56   25.18
   1  -1  23    0.34   24.24
  -1   1 -23   23.43   24.89
  -1   1 -24   -8.89   26.06
   1  -1  24   -0.44   24.87
  -1   1 -24    4.95   25.21
  -1   1 -25   -1.81   25.38
   1  -1  25   14.72   23.52
  -1   1 -25   17.34   24.84
  -1   1 -26   15.06   24.28
   1  -1  26   -3.29   32.95
  -1   1 -26    6.02   22.28
   1   0 -25    7.10   25.86
  -1   0  25    2.88   24.84
   1   0 -25   16.05   24.05
   1   0 -24    0.79   25.12
   1   0 -24   26.66   25.65
  -1   0  24   30.82   28.53
   1   0 -24   38.53   24.42
   1   0 -23   18.09   26.05
  -1   0  23   25.75   25.86
  -1   0  23    7.38   32.02
   1   0 -23   38.27   23.61
   1   0 -22   -1.20   25.89
  -1   0  22  -15.88   26.78
  -1   0  22    1.84   33.03
   1   0 -22  -12.42   24.40
  -1   0  21    0.06   28.93
   1   0 -21   26.04   28.01
  -1   0  21   38.17   30.94
  -1   0  21   41.09   31.97
   1   0 -21   27.95   26.05
  -1   0  20   -4.54   28.44
   1   0 -20   19.50   28.86
  -1   0  20   35.79   29.64
  -1   0  20  -22.59   32.33
   1   0 -20   11.02   26.75
  -1   0  19    6.96   29.26
   1   0 -19   25.08   29.17
  -1   0  19   58.90   29.32
  -1   0  19   57.01   32.75
   1   0 -19   50.32   24.95
   1   0 -18  784.23   37.52
  -1   0  18  944.98   46.08
  -1   0  18  936.34   40.65
   1   0 -18  878.00   32.56
  -1   0  17   28.60   30.73
   1   0 -17   42.65   28.03
  -1   0  17    7.94   30.52
  -1   0  17   62.28   31.98
   1   0 -17   47.31   28.20
  -1   0  16  883.14   66.92
   1   0 -16 1055.29   65.20
  -1   0  16 1168.22   75.44
  -1   0  16 1253.75   80.39
   1   0 -16 1300.59   72.71
  -1   0  15  220.56   32.57
  -1   0  15  207.87   24.91
   1   0 -15  261.67   26.68
  -1   0  15  263.32   39.50
  -1   0  15  325.67   32.13
   1   0 -15  306.37   30.85
  -1   0  14   66.70   30.82
  -1   0  14   41.22   21.93
   1   0 -14   52.97   21.80
  -1   0  14   52.25   28.60
   1   0 -14   78.97   27.38
  -1   0  13   33.99   29.44
  -1   0  13   31.76   23.51
   1   0 -13   31.99   20.03
  -1   0  13   56.36   26.35
   1   0 -13   -0.83   29.44
  -1   0  13   40.13   25.65
   1   0 -13   28.06   25.02
  -1   0  12  900.99   63.12
  -1   0  12  801.43   56.13
   1   0 -12  869.65   55.96
  -1   0  12  908.96   62.60
  -1   0  12  690.55   62.82
  -1   0  12 1013.57   70.54
   1   0 -12  984.61   61.39
  -1   0  11  201.43   29.56
   1   0 -11  213.67   22.64
  -1   0  11  199.93   27.55
  -1   0  11  198.04   46.85
   1   0 -11  196.82   31.35
  -1   0  10  212.42   43.29
  -1   0  10  291.13   41.84
   1   0 -10  233.29   44.90
  -1   0   9 2339.50  124.44
  -1   0   9 2546.12  152.10
   1   0  -8  896.74   64.31
  -1   0   8  823.99   88.39
   1   0  -7  909.25   62.80
  -1   0   7  796.46   83.32
  -1   0   6   15.81   53.10
  -1   0   5  381.86   74.50
  -1   0   4 4049.28  177.72
  -1   0   3 3647.46  209.41
  -1   0   2 -235.73   61.45
  -1   0   2 -100.53   99.47
   1   0   338253.10  549.47
  -1   0  -338972.19  322.10
   1   0   4 9496.50  152.71
  -1   0  -4 8900.60  141.21
   1   0   5 3838.92  164.66
  -1   0  -5 3715.45  157.71
   1   0   6   47.91   49.40
  -1   0  -6   -2.75   41.02
   1   0   7 1827.07   95.67
  -1   0  -7 1598.42   83.26
   1   0   7 1556.60   84.60
  -1   0  -7 1737.15  114.40
   1   0   8  163.24   37.47
  -1   0  -8  182.32   37.98
   1   0   8  177.81   55.50
  -1   0  -8  155.21   47.87
   1   0   9  116.25   34.08
  -1   0  -9  113.96   27.45
   1   0   9  130.37   51.69
  -1   0  -9  118.59   42.79
   1   0  10  167.98   39.39
  -1   0 -10   87.27   26.63
   1   0  11   46.70   29.15
  -1   0 -11  254.36   46.27
   1   0  12    2.90   28.05
  -1   0 -12   51.41   25.52
  -1   0 -12  -24.42   30.84
   1   0  12   -0.13   38.17
  -1   0 -12   27.72   25.05
   1   0  13  112.88   25.27
   1   0  13  154.43   24.13
  -1   0 -13  171.29   22.48
  -1   0 -13  213.66   32.34
   1   0  13  151.95   31.76
   1   0  13  170.74   21.19
  -1   0 -13  203.01   24.43
  -1   0 -13  184.95   29.18
   1   0  14  115.96   24.12
   1   0  14  157.73   21.40
  -1   0 -14  177.10   24.15
   1   0  14  158.56   22.27
  -1   0 -14  178.14   31.43
   1   0  14  129.45   29.87
   1   0  14  155.49   21.13
  -1   0 -14  213.65   24.00
  -1   0 -14  237.33   29.97
   1   0  15   -7.04   25.48
   1   0  15    0.41   20.30
  -1   0 -15  -26.10   24.31
   1   0  15    7.37   23.21
  -1   0 -15  -43.26   31.70
   1   0  15  -17.54   25.85
   1   0  15    6.17   23.46
  -1   0 -15    6.75   24.40
  -1   0 -15    6.24   24.86
   1   0  16   -2.33   29.09
   1   0  16   17.99   18.89
  -1   0 -16   13.17   25.71
   1   0  16   13.13   23.26
  -1   0 -16  -44.58   33.10
   1   0  16   23.37   22.70
  -1   0 -16   30.63   25.91
  -1   0 -16   22.37   23.31
   1   0  17  248.97   33.46
   1   0  17  255.01   22.62
  -1   0 -17  372.10   29.60
   1   0  17  348.21   29.69
   1   0  17  401.77   27.36
  -1   0 -17  456.57   36.37
   1   0  18  -32.59   33.19
  -1   0 -18  -13.97   28.29
   1   0  18    1.52   28.35
  -1   0 -18   -2.52   28.16
  -1   0 -19   39.03   28.98
   1   0  19   36.61   29.42
  -1   0 -19   52.15   30.87
  -1   0 -20 1420.55   78.03
   1   0  20 1678.36   91.14
  -1   0 -20 1627.85   86.40
  -1   0 -21   38.87   27.62
   1   0  21   25.93   29.11
  -1   0 -21   56.58   27.53
  -1   0 -22   -0.32   28.16
  -1   0 -22   -1.55   27.79
   1   0  22  -23.42   27.49
  -1   0 -22   22.26   25.15
  -1   0 -23  -13.18   27.63
  -1   0 -23  -13.40   26.22
   1   0  23    2.00   24.65
  -1   0 -23    3.99   25.78
  -1   0 -24  -20.69   24.92
  -1   0 -24   42.08   26.58
   1   0  24    7.48   23.99
  -1   0 -24   35.10   24.30
  -1   0 -25   62.99   25.42
  -1   0 -25   72.50   25.32
  -1   0 -25   81.93   22.96
  -1   0 -26   -1.24   25.94
  -1   0 -26   11.67   24.35
  -1   0 -26    4.07   21.47
   1   1 -25    7.21   25.63
  -1  -1  25    9.46   24.03
   1   1 -25   14.81   24.95
   1   1 -24   13.04   25.19
  -1  -1  24   -7.43   27.87
   1   1 -24   24.95   25.16
  -1  -1  23   19.30   24.30
  -1  -1  23   35.96   29.56
   1   1 -23   49.33   24.18
  -1  -1  22   15.45   32.94
   1   1 -22   33.67   24.05
  -1  -1  22   65.07   25.91
  -1  -1  22   63.48   29.28
  -1  -1  21    1.01   32.53
   1   1 -21   -3.03   24.39
  -1  -1  21  -12.41   28.30
  -1  -1  21    8.93   33.27
  -1  -1  20  163.84   34.60
   1   1 -20  160.27   27.32
  -1  -1  20  276.26   29.69
  -1  -1  20  253.70   33.58
  -1  -1  19  226.41   34.57
   1   1 -19  224.69   29.60
  -1  -1  19  342.36   31.22
  -1  -1  19  352.41   35.44
   1   1 -18  552.10   33.97
  -1  -1  18  618.14   35.56
  -1  -1  17  556.55   42.41
   1   1 -17  574.27   39.69
  -1  -1  17  705.59   45.02
  -1  -1  17  778.58   51.16
  -1  -1  16  -24.92   29.57
   1   1 -16   13.23   26.26
  -1  -1  16   -2.17   30.57
  -1  -1  16   37.98   30.11
  -1  -1  15  159.40   32.76
  -1  -1  15  140.07   20.50
   1   1 -15  156.72   26.08
  -1  -1  15  252.65   32.77
  -1  -1  15  240.48   31.26
  -1  -1  14  101.80   28.95
  -1  -1  14  131.50   23.31
   1   1 -14  126.80   24.64
  -1  -1  14  157.35   27.97
  -1  -1  14  170.41   28.10
  -1  -1  13  290.01   28.64
  -1  -1  13  394.73   30.34
   1   1 -13  302.26   27.80
  -1  -1  13  395.74   36.26
  -1  -1  13  388.50   30.33
  -1  -1  12  337.05   30.18
  -1  -1  12  324.21   28.99
   1   1 -12  301.22   22.99
  -1  -1  12  421.74   29.58
  -1  -1  12  396.35   31.35
  -1  -1  11  405.37   29.18
  -1  -1  11  402.96   30.64
  -1  -1  11  566.50   37.91
  -1  -1  11  480.99   34.40
   1   1 -10  -73.06   35.30
   1   1 -10  -74.72   28.87
   1   1  -9   35.87   40.33
   1   1  -8  477.24   53.28
   1   1  -7  172.69   49.78
   1   1  -6  441.62   52.97
  -1  -1   5  372.08   50.06
   1   1  -5    9.51   71.17
  -1  -1   4  835.57   92.63
   1   1  -4  858.12   65.30
   1   1  -4  541.97   89.90
  -1  -1   3 3050.43  130.20
   1   1  -3 2566.17  123.41
   1   1  -3 2249.92  126.63
  -1  -1   2 1045.69   76.20
   1   1  -2  723.66   70.20
   1   1  -123360.64  214.82
   1   1   2  121.12   58.06
  -1  -1  -2    1.38   67.97
   1   1   3 9436.43  206.35
  -1  -1  -3 8554.14  140.43
   1   1   3 8904.62  147.72
   1   1   4 5196.07  210.25
  -1  -1  -4 4612.53  188.02
  -1  -1  -4 5786.13  177.74
   1   1   5 2904.45  121.90
  -1  -1  -5 2706.23  129.41
  -1  -1  -5 2760.93  159.76
   1   1   6 3709.06  152.32
  -1  -1  -6 3174.92  143.03
  -1  -1  -6 4059.99  181.92
   1   1   7  332.23   37.58
  -1  -1  -7  321.05   39.07
   1   1   7  398.27   65.19
  -1  -1  -7  396.68   44.67
   1   1   8  158.32   35.12
  -1  -1  -8  140.13   30.19
   1   1   8  214.88   60.70
  -1  -1  -8  208.91   48.44
   1   1   9   34.40   32.53
  -1  -1  -9   20.86   25.73
   1   1   9   80.67   49.84
  -1  -1  -9   25.28   38.11
  -1  -1 -10   -3.62   23.80
  -1  -1 -10  202.33   52.04
   1   1  11  -42.73   30.69
  -1  -1 -11  -45.71   23.42
  -1  -1 -11 -197.08   38.78
   1   1  12  -57.59   25.48
  -1  -1 -12   -9.51   21.18
  -1  -1 -12  -22.36   26.88
   1   1  12  -48.02   39.09
  -1  -1 -12  -19.27   20.26
  -1  -1 -12 -115.09   31.05
   1   1  13   61.74   23.73
  -1  -1 -13   80.36   23.99
   1   1  13   42.70   21.78
  -1  -1 -13   75.53   30.95
   1   1  13   97.75   36.28
   1   1  13   72.41   19.90
  -1  -1 -13  100.78   22.83
  -1  -1 -13   89.29   31.69
   1   1  14   61.83   20.19
  -1  -1 -14   88.06   24.18
   1   1  14   70.20   24.42
  -1  -1 -14   96.95   33.25
   1   1  14   67.35   31.13
   1   1  14   80.54   19.78
  -1  -1 -14  117.04   22.69
  -1  -1 -14  116.79   27.34
   1   1  15   33.42   20.96
  -1  -1 -15   16.41   22.80
   1   1  15   44.65   23.49
  -1  -1 -15   11.65   34.50
   1   1  15  122.03   29.96
   1   1  15   34.90   22.63
  -1  -1 -15   59.98   23.82
  -1  -1 -15   36.74   25.28
   1   1  16  102.04   21.04
  -1  -1 -16  125.94   24.57
   1   1  16  120.06   24.63
  -1  -1 -16  107.90   34.89
   1   1  16   88.31   28.66
   1   1  16  143.60   25.24
  -1  -1 -16  180.83   27.23
  -1  -1 -16  127.47   22.32
   1   1  17   89.61   21.07
  -1  -1 -17  131.38   28.49
   1   1  17   95.62   32.58
  -1  -1 -17  120.47   36.62
   1   1  17  119.35   40.35
   1   1  17  129.00   27.34
  -1  -1 -17  161.41   27.13
  -1  -1 -18  -34.40   28.81
   1   1  18  -83.00   25.81
  -1  -1 -18  -88.70   35.93
   1   1  18  -14.21   28.31
  -1  -1 -18  -22.11   24.74
  -1  -1 -19   30.03   30.08
   1   1  19   71.36   29.49
  -1  -1 -19   87.58   27.96
  -1  -1 -20   63.37   32.50
   1   1  20   76.14   31.12
  -1  -1 -20  110.20   27.94
  -1  -1 -21  366.25   34.80
  -1  -1 -21  444.29   37.49
   1   1  21  416.54   38.69
  -1  -1 -21  392.44   34.23
  -1  -1 -22  123.81   27.66
  -1  -1 -22  189.70   30.43
   1   1  22  141.31   29.80
  -1  -1 -22  126.29   25.74
  -1  -1 -23   -4.10   27.49
  -1  -1 -23    9.37   27.87
   1   1  23  -16.94   27.67
  -1  -1 -23   -2.88   24.79
  -1  -1 -24   45.11   26.95
  -1  -1 -24   99.78   26.25
  -1  -1 -24   72.71   24.25
  -1  -1 -25    6.00   26.01
  -1  -1 -25   21.10   25.19
  -1  -1 -25   12.93   22.96
  -1  -1 -26    5.33   24.49
  -1  -1 -26   15.46   25.57
  -1  -1 -26   16.56   20.40
  -1  -2  25   13.21   25.23
  -1  -2  24  -28.99   32.01
  -1  -2  24    5.80   27.21
  -1  -2  23   27.60   35.56
  -1  -2  23   30.68   24.05
  -1  -2  23   22.29   28.74
  -1  -2  22  104.85   38.14
  -1  -2  22  114.58   26.06
  -1  -2  22  160.22   30.46
   1   2 -22  154.00   28.14
  -1  -2  21   51.91   37.01
  -1  -2  21   81.88   24.86
  -1  -2  21   56.19   28.83
   1   2 -21  105.90   26.95
  -1  -2  20    9.72   34.08
  -1  -2  20    9.04   26.18
  -1  -2  20   37.22   33.40
   1   2 -20   47.28   27.64
  -1  -2  19  -19.29   33.24
   1   2 -19  -26.20   24.36
  -1  -2  19    6.02   26.03
  -1  -2  19  -16.11   31.89
   1   2 -19   -7.09   28.01
  -1  -2  18  252.74   34.08
   1   2 -18  209.98   27.51
  -1  -2  18  321.90   29.26
  -1  -2  18  349.21   34.01
   1   2 -18  351.60   30.37
  -1  -2  17   60.28   31.71
   1   2 -17   58.19   25.19
  -1  -2  17   94.06   27.86
  -1  -2  17   87.22   29.59
   1   2 -17  128.01   28.90
  -1  -2  16  -14.70   30.12
   1   2 -16  -40.76   25.90
  -1  -2  16   28.02   27.46
  -1  -2  16   14.33   31.31
   1   2 -16   14.74   27.89
  -1  -2  15   36.82   30.43
  -1  -2  15   47.65   21.74
   1   2 -15   28.74   23.22
  -1  -2  15   29.04   27.16
  -1  -2  15   79.13   30.31
   1   2 -15   41.86   27.24
  -1  -2  14  481.28   34.76
  -1  -2  14  543.80   37.59
   1   2 -14  516.14   43.45
  -1  -2  14  750.30   48.62
  -1  -2  14  724.99   47.28
   1   2 -14  667.58   35.70
  -1  -2  13  314.36   30.14
  -1  -2  13  353.28   28.04
   1   2 -13  301.74   29.35
  -1  -2  13  421.72   32.19
  -1  -2  12  281.75   26.71
   1   2 -12  251.66   28.68
  -1  -2  12  364.32   30.06
   1   2 -12  415.26   27.43
  -1  -2  11   55.56   24.19
  -1  -2  11   79.89   26.36
   1   2 -11   75.70   24.84
  -1  -2  10  152.11   27.38
  -1  -2  10  235.76   28.15
   1   2 -10  303.51   27.43
   1   2  -9   38.24   48.28
   1   2  -8   33.80   54.92
  -1  -2   7 1684.47  108.53
   1   2  -7 1380.70   69.01
   1   2  -7 1252.13   98.79
  -1  -2   6  -22.73   42.36
   1   2  -6  -33.63   29.50
  -1  -2   513226.63  195.76
   1   2  -512936.56  169.40
   1   2  -512251.54  235.71
  -1  -2   4   96.75   49.59
   1   2  -4    9.87   39.65
   1   2  -4  383.26  117.11
  -1  -2   311850.24  150.03
   1   2  -312066.82  155.02
  -1  -2   223740.84  244.92
   1   2  -223856.65  237.14
  -1  -2   1 2973.92  129.07
   1   2  -1 2342.52  114.46
   1   2   0    2.20   61.96
   1   2   0  -44.64   60.98
   1   2   114255.84  322.47
   1   2   114458.48  206.29
  -1  -2  -2 1115.62   80.57
   1   2   2  621.08   66.47
   1   2   3  283.35   62.64
  -1  -2  -3  526.62   63.63
  -1  -2  -3  573.13   64.17
   1   2   4  215.23   56.94
  -1  -2  -4  112.52   49.59
  -1  -2  -4  382.41   56.17
   1   2   5 2345.13  123.51
  -1  -2  -5 2153.38  130.01
  -1  -2  -5 2641.31  142.30
   1   2   6  819.14   58.04
  -1  -2  -6  632.40   66.99
  -1  -2  -6  809.42   73.48
   1   2   7  -12.10   33.21
  -1  -2  -7   -7.25   27.38
   1   2   7   -7.74   59.26
  -1  -2  -7  -66.35   36.39
   1   2   8   -7.61   32.43
  -1  -2  -8    7.57   25.55
   1   2   8  -64.79   57.44
  -1  -2  -8  -34.24   34.70
   1   2   9  350.13   35.41
  -1  -2  -9  391.40   36.57
  -1  -2 -10    5.70   24.97
   1   2  10  133.44   51.41
  -1  -2 -10  136.54   35.48
   1   2  11  533.19   35.03
  -1  -2 -11  502.19   26.79
  -1  -2 -11  475.06   39.59
  -1  -2 -11  509.58   46.73
   1   2  12  635.65   51.18
  -1  -2 -12  613.22   41.53
   1   2  12  688.81   65.80
  -1  -2 -12  658.46   45.02
  -1  -2 -12  742.42   59.86
   1   2  13   39.05   22.43
   1   2  13   28.62   22.97
  -1  -2 -13   33.32   28.32
   1   2  13   19.80   35.97
   1   2  13   14.38   20.45
  -1  -2 -13   47.63   21.64
  -1  -2 -13   43.10   26.33
   1   2  14  212.04   24.17
   1   2  14  183.41   26.89
  -1  -2 -14  194.09   35.67
   1   2  14  209.68   35.96
   1   2  14  261.42   28.19
  -1  -2 -14  248.14   24.84
  -1  -2 -14  209.06   26.60
   1   2  15  311.15   27.90
   1   2  15  306.37   32.64
  -1  -2 -15  321.39   38.73
   1   2  15  217.24   38.29
   1   2  15  306.76   33.34
  -1  -2 -15  360.50   28.88
  -1  -2 -15  286.50   34.08
   1   2  16  738.60   39.58
   1   2  16  828.22   47.60
   1   2  16  705.44   54.91
   1   2  16  882.16   46.02
  -1  -2 -16  918.02   45.04
  -1  -2 -16  850.85   50.42
  -1  -2 -17  305.89   30.37
   1   2  17  257.37   30.32
  -1  -2 -17  254.43   37.68
   1   2  17  215.39   36.86
  -1  -2 -17  289.12   27.31
  -1  -2 -18 4454.21  166.05
   1   2  18 4165.25  169.26
  -1  -2 -18 5420.34  234.57
   1   2  18 4828.67  193.27
  -1  -2 -18 4577.83  184.38
  -1  -2 -19  108.25   31.36
   1   2  19   19.12   28.69
  -1  -2 -19   56.51   39.99
   1   2  19   79.66   30.24
  -1  -2 -19  100.33   28.61
  -1  -2 -20 1082.95   59.47
  -1  -2 -20  877.26   57.22
  -1  -2 -20 1012.94   76.72
   1   2  20  928.76   61.20
  -1  -2 -20  891.12   54.43
  -1  -2 -21   -9.81   30.70
  -1  -2 -21   16.59   28.08
   1   2  21   11.87   29.95
  -1  -2 -21   12.28   26.55
  -1  -2 -22  -12.05   27.15
  -1  -2 -22  -26.58   28.86
   1   2  22   -3.13   27.80
  -1  -2 -22   -1.83   24.79
  -1  -2 -23   62.94   25.98
  -1  -2 -23   70.95   28.50
  -1  -2 -23   98.42   24.36
  -1  -2 -24   -3.54   24.59
  -1  -2 -24   36.64   26.14
  -1  -2 -24  -14.29   22.72
  -1  -2 -25  -10.95   26.70
  -1  -2 -25    4.07   27.07
  -1  -2 -25    7.75   21.75
  -1  -2 -26  -13.92   25.53
  -1  -2 -26    9.71   25.15
  -1  -2 -26   29.93   19.94
  -1  -3  25   18.46   25.49
   1   3 -25   -3.67   25.00
  -1  -3  24  115.85   35.12
   1   3 -24  152.03   26.81
  -1  -3  24  139.18   26.45
   1   3 -24  141.68   28.14
  -1  -3  23    4.56   38.34
  -1  -3  23   15.98   26.29
   1   3 -23   17.09   26.93
  -1  -3  22  241.32   39.22
  -1  -3  22  232.79   27.61
  -1  -3  22  262.01   30.50
   1   3 -22  311.83   31.20
  -1  -3  21   81.29   39.06
  -1  -3  21   75.37   27.04
  -1  -3  21   90.51   27.71
   1   3 -21  123.78   27.37
  -1  -3  20   87.09   39.34
  -1  -3  20  109.84   27.57
  -1  -3  20   97.61   29.37
   1   3 -20  108.59   30.71
  -1  -3  19   85.12   34.62
  -1  -3  19   94.42   28.06
  -1  -3  19  120.17   31.07
   1   3 -19  128.81   29.48
  -1  -3  18    4.64   33.78
  -1  -3  18   50.53   26.76
  -1  -3  18   76.83   32.01
   1   3 -18   44.42   27.95
  -1  -3  17   88.28   32.34
  -1  -3  17  118.80   27.78
  -1  -3  17  182.47   32.41
   1   3 -17  136.40   28.84
  -1  -3  16   50.22   29.97
  -1  -3  16   72.72   27.19
  -1  -3  16   72.53   32.03
   1   3 -16   70.98   27.71
  -1  -3  15   -3.80   27.52
  -1  -3  15    2.90   26.42
   1   3 -15   24.63   26.07
  -1  -3  14  155.87   27.81
  -1  -3  14  251.95   30.56
  -1  -3  14  157.40   23.08
   1   3 -14  283.46   30.14
  -1  -3  13  218.04   27.00
  -1  -3  13  306.19   27.39
  -1  -3  13  181.76   25.24
   1   3 -13  327.74   28.01
  -1  -3  12   50.88   23.90
  -1  -3  12   52.51   27.14
  -1  -3  12    1.17   23.59
   1   3 -12   54.73   22.61
  -1  -3  11   -6.74   22.58
  -1  -3  11   -5.66   25.56
  -1  -3  11   -9.59   23.08
   1   3 -11    7.22   22.83
  -1  -3  10   70.38   28.15
  -1  -3  10   95.18   26.09
  -1  -3  10   69.16   24.37
  -1  -3  10  105.04   26.49
   1   3 -10   84.74   22.14
  -1  -3   9   50.44   34.61
  -1  -3   9   62.67   24.53
  -1  -3   9  156.07   28.13
  -1  -3   8 5336.34  232.44
   1   3  -8 4383.78  213.23
   1   3  -7 3453.48  198.69
  -1  -3   6  -32.24   40.16
   1   3  -6  -28.30   27.69
   1   3  -6  -25.36   37.79
  -1  -3   5 5738.75  142.25
   1   3  -5 5807.52  102.03
  -1  -3   4 4331.10  190.05
   1   3  -4 4895.51  193.92
  -1  -3   3 1433.28   78.31
   1   3  -3 1393.30   63.02
  -1  -3   215945.66  212.18
   1   3  -217179.19  203.46
  -1  -3   1 7881.84  162.65
   1   3  -1 8312.88  134.97
   1   3  -1 8031.07  213.89
   1   3   0 8943.35  166.62
   1   3   0 8427.23  232.05
   1   3   0 8543.84  197.70
   1   3   1 6328.88  154.88
   1   3   1 5979.06  230.51
   1   3   1 6234.06  165.61
   1   3   2 2998.94  147.45
   1   3   2 2809.41  124.06
  -1  -3  -2 3366.65  187.97
   1   3   2 3237.90  159.93
   1   3   3  223.44   58.55
  -1  -3  -3  350.75   53.73
   1   3   3  211.88   47.74
   1   3   4  336.83   47.83
  -1  -3  -4  416.56   48.74
  -1  -3  -4  421.49   53.30
   1   3   5  -19.56   38.60
  -1  -3  -5   11.54   35.94
  -1  -3  -5  -22.60   39.47
   1   3   6  309.41   39.56
  -1  -3  -6  287.37   38.88
  -1  -3  -6  366.87   41.87
   1   3   7  362.53   37.96
  -1  -3  -7  299.12   38.74
   1   3   7  356.48   50.02
  -1  -3  -7  304.47   35.56
   1   3   8  249.90   46.72
  -1  -3  -8  129.12   28.35
   1   3   8  349.15   60.00
  -1  -3  -8  312.83   37.94
   1   3   9  660.29   58.59
  -1  -3  -9  413.39   39.53
   1   3   9  706.71   79.57
  -1  -3  -9  583.52   49.37
   1   3  10  146.83   32.59
  -1  -3 -10  130.42   22.00
  -1  -3 -10  169.89   37.02
   1   3  10  197.87   50.09
  -1  -3 -10  152.69   29.52
   1   3  11   45.00   27.32
  -1  -3 -11   66.09   21.59
   1   3  11   53.17   24.64
  -1  -3 -11   45.37   21.68
   1   3  11   16.36   40.51
  -1  -3 -11   30.06   25.28
   1   3  12   -6.35   25.15
  -1  -3 -12   -5.95   23.50
   1   3  12   -2.99   23.20
  -1  -3 -12  -22.04   24.39
   1   3  12   -0.83   39.74
   1   3  12  -20.05   23.36
  -1  -3 -12    9.10   19.06
  -1  -3 -12  -13.36   24.61
   1   3  13  713.65   49.87
  -1  -3 -13  788.77   41.92
   1   3  13  641.45   49.42
  -1  -3 -13  666.31   46.58
   1   3  13  741.99   68.85
   1   3  13  671.33   48.43
  -1  -3 -13  649.71   49.94
  -1  -3 -13  700.86   54.69
   1   3  14   43.86   22.55
  -1  -3 -14   52.39   25.26
   1   3  14   42.81   27.10
  -1  -3 -14   51.75   27.25
   1   3  14   39.94   31.93
   1   3  14   44.27   24.59
  -1  -3 -14   69.95   23.09
  -1  -3 -14   80.73   25.00
   1   3  15  628.40   39.09
  -1  -3 -15  803.38   37.39
   1   3  15  783.55   50.51
  -1  -3 -15  733.55   43.26
   1   3  15  598.29   61.07
   1   3  15  742.59   39.53
  -1  -3 -15  666.59   43.73
  -1  -3 -15  651.83   45.53
  -1  -3 -16   -1.92   28.19
   1   3  16  -16.31   29.62
  -1  -3 -16  -67.96   32.54
   1   3  16    7.38   29.19
   1   3  16    1.07   28.09
  -1  -3 -16   35.01   25.63
  -1  -3 -16    1.00   22.86
   1   3  17  -18.06   29.63
  -1  -3 -17  -13.16   30.00
  -1  -3 -17   -9.63   37.71
   1   3  17  -65.44   39.72
  -1  -3 -17   32.06   26.28
   1   3  18   54.97   31.69
  -1  -3 -18   61.14   29.98
  -1  -3 -18   70.50   37.13
   1   3  18   56.99   30.81
  -1  -3 -18   92.22   25.59
   1   3  19  862.88   60.03
  -1  -3 -19  981.10   67.74
  -1  -3 -19 1122.25   78.35
   1   3  19 1015.80   65.58
  -1  -3 -19  947.25   60.27
  -1  -3 -20   26.28   29.43
  -1  -3 -20   64.99   37.88
   1   3  20   39.79   27.59
  -1  -3 -20   39.09   26.71
  -1  -3 -21   -4.38   27.86
  -1  -3 -21  -26.18   38.34
  -1  -3 -21   -8.55   24.73
  -1  -3 -22    3.67   27.12
  -1  -3 -22    9.90   22.62
  -1  -3 -23   10.14   25.02
  -1  -3 -23   -3.45   27.50
  -1  -3 -23   -5.77   22.68
  -1  -3 -24    6.40   26.01
  -1  -3 -24   -4.75   26.16
  -1  -3 -24   -2.89   21.34
  -1  -3 -25   21.40   24.19
  -1  -3 -26   -3.14   25.15
  -1  -4  24  140.95   34.88
   1   4 -24  148.24   26.42
  -1  -4  24  153.25   28.55
  -1  -4  24  161.05   28.41
   1   4 -24  144.96   25.82
  -1  -4  23   -4.57   37.17
  -1  -4  23   -1.90   29.45
  -1  -4  23   13.69   27.67
   1   4 -23  -11.79   24.64
  -1  -4  22   91.23   43.08
  -1  -4  22   77.81   25.83
  -1  -4  22  119.14   28.01
   1   4 -22   70.63   26.41
  -1  -4  21   13.86   41.31
  -1  -4  21   36.36   26.23
  -1  -4  21   26.60   27.67
   1   4 -21   19.53   28.06
  -1  -4  20   83.86   40.37
  -1  -4  20   41.06   28.71
  -1  -4  20   72.97   26.83
   1   4 -20   76.50   29.00
  -1  -4  19   64.45   36.08
  -1  -4  19   40.88   27.61
  -1  -4  19   99.58   28.26
   1   4 -19   61.17   27.13
  -1  -4  18   26.17   34.89
  -1  -4  18   16.81   28.58
   1   4 -18   10.50   27.09
  -1  -4  17   64.72   30.51
  -1  -4  17  124.15   30.65
   1   4 -17  100.44   27.82
  -1  -4  16  280.51   32.64
  -1  -4  16  326.69   29.24
  -1  -4  16  206.34   28.15
   1   4 -16  349.41   28.90
  -1  -4  15   62.36   29.65
  -1  -4  15   66.48   27.94
  -1  -4  15   39.30   25.36
   1   4 -15   62.91   26.16
  -1  -4  14   74.56   27.35
  -1  -4  14    7.72   27.17
  -1  -4  14   26.32   24.92
   1   4 -14   34.38   25.12
  -1  -4  13  186.76   24.70
  -1  -4  13  321.36   32.49
  -1  -4  13  194.17   25.29
   1   4 -13  341.50   29.50
  -1  -4  12   90.22   24.29
  -1  -4  12   91.28   26.36
  -1  -4  12   70.48   24.69
  -1  -4  12  155.49   28.74
   1   4 -12   98.77   24.10
  -1  -4  11   54.57   24.84
  -1  -4  11   84.90   27.35
  -1  -4  11   32.29   24.15
  -1  -4  11   74.22   29.67
   1   4 -11   65.20   22.00
  -1  -4  10   41.58   22.98
  -1  -4  10   41.88   28.30
  -1  -4  10   38.33   24.22
  -1  -4  10   48.66   23.50
  -1  -4  10   75.70   28.08
   1   4 -10   32.50   19.08
  -1  -4   9  309.39   24.49
  -1  -4   9  397.90   33.41
  -1  -4   9  437.02   35.06
  -1  -4   9  388.79   30.21
  -1  -4   9  392.52   34.03
   1   4  -9  386.77   26.03
  -1  -4   8  784.42   50.35
  -1  -4   8 1028.64   73.48
  -1  -4   8 1043.03   73.00
  -1  -4   8 1070.55   69.10
  -1  -4   8  917.21   70.10
  -1  -4   7 2029.24   80.67
  -1  -4   7 2707.05  122.26
  -1  -4   7 2436.69  106.94
  -1  -4   7 2490.39  100.41
  -1  -4   7 2142.14  104.02
  -1  -4   6  639.91   57.98
  -1  -4   5 4219.94  198.48
   1   4  -4 8427.23  129.75
   1   4  -3    3.76   29.33
  -1  -4   2 3942.63  189.94
   1   4  -2 4169.72  191.66
   1   4  -2 3814.76  202.75
   1   4  -1  358.03   43.98
   1   4  -1  335.94   57.75
   1   4  -1  330.78   52.29
   1   4   0  922.82   86.76
   1   4   0  824.68   96.08
   1   4   0  827.40   79.82
   1   4   1  -34.75   34.19
   1   4   1   21.25   48.96
   1   4   1   31.58   35.94
   1   4   2 1478.82  120.74
   1   4   2 1186.62  110.39
   1   4   2 1566.90   93.89
   1   4   3 5994.96  230.67
   1   4   3 6788.99  175.62
   1   4   4 2566.75  171.62
   1   4   4 2088.28  141.34
  -1  -4  -4 2425.42  164.19
   1   4   5 1202.35   95.59
  -1  -4  -5 1073.46   91.01
  -1  -4  -5 1175.57   98.88
   1   4   6  151.49   41.80
  -1  -4  -6   73.28   31.26
  -1  -4  -6  225.09   46.73
   1   4   7  130.42   37.45
  -1  -4  -7   76.58   28.83
   1   4   8  636.87   52.10
  -1  -4  -8  452.57   43.57
   1   4   8  409.82   60.22
  -1  -4  -8  459.73   53.77
   1   4   9   28.87   32.03
  -1  -4  -9   32.97   21.77
  -1  -4  -9   51.23   29.59
  -1  -4  -9   23.47   23.28
   1   4   9   43.63   45.78
  -1  -4  -9   -9.41   24.69
   1   4  10  960.45   69.76
  -1  -4 -10  843.04   53.20
  -1  -4 -10  683.66   58.45
  -1  -4 -10  903.27   60.68
   1   4  10  875.78   71.89
  -1  -4 -10  669.17   59.30
   1   4  11  -12.53   25.88
  -1  -4 -11   21.27   22.77
  -1  -4 -11  -17.17   24.95
  -1  -4 -11    1.86   23.88
   1   4  11    1.34   43.30
  -1  -4 -11    1.98   21.76
   1   4  12  651.40   46.69
  -1  -4 -12  756.07   41.25
  -1  -4 -12  509.94   49.88
  -1  -4 -12  565.21   43.23
   1   4  12  685.42   69.42
   1   4  12  501.35   44.24
  -1  -4 -12  559.99   44.32
   1   4  13   60.64   24.86
  -1  -4 -13   87.08   24.87
   1   4  13   29.47   28.03
  -1  -4 -13   41.03   20.52
  -1  -4 -13   58.57   24.79
   1   4  13   52.79   35.32
   1   4  13   61.51   27.06
  -1  -4 -13   62.71   21.61
  -1  -4 -14  149.45   26.39
   1   4  14  133.43   30.76
  -1  -4 -14  134.51   28.20
  -1  -4 -14  114.53   27.90
   1   4  14  112.95   35.01
   1   4  14  139.56   47.51
  -1  -4 -14  132.76   23.83
  -1  -4 -15   20.06   29.43
   1   4  15  -43.41   31.36
  -1  -4 -15  -10.05   23.83
  -1  -4 -15  -24.80   29.66
   1   4  15   36.64   30.32
   1   4  15  -26.19   28.21
  -1  -4 -16 4837.15  181.96
   1   4  16 5071.62  209.87
  -1  -4 -16 4226.56  185.15
   1   4  16 4511.48  193.54
  -1  -4 -17   60.36   30.22
   1   4  17   62.89   33.15
  -1  -4 -17   53.24   27.71
  -1  -4 -17  -27.76   35.48
   1   4  17   64.35   29.67
  -1  -4 -17   44.14   26.02
  -1  -4 -18  703.82   44.40
   1   4  18  774.20   58.14
  -1  -4 -18  584.00   56.82
  -1  -4 -18  683.56   54.00
  -1  -4 -18  497.78   44.23
  -1  -4 -19   -7.10   32.37
   1   4  19   -5.97   33.66
  -1  -4 -19  -27.21   27.48
  -1  -4 -19   -6.30   41.82
  -1  -4 -19    4.92   25.25
  -1  -4 -20  433.94   37.06
  -1  -4 -20  322.54   37.41
  -1  -4 -20  463.49   49.13
  -1  -4 -20  308.34   30.04
  -1  -4 -21   14.24   29.60
  -1  -4 -21   31.45   27.24
  -1  -4 -21   -1.14   39.61
  -1  -4 -22   -0.25   25.83
  -1  -4 -22   -0.31   36.16
  -1  -4 -23   -0.27   24.19
  -1  -5  23    4.41   33.97
   1   5 -23    1.24   23.99
  -1  -5  23   -3.87   24.60
  -1  -5  23   29.93   27.63
   1   5 -23   26.67   23.83
  -1  -5  22  -33.13   39.92
  -1  -5  22   -5.68   27.58
  -1  -5  22    6.11   26.32
   1   5 -22   14.60   24.67
  -1  -5  21   18.38   40.87
  -1  -5  21    9.04   25.49
  -1  -5  21    7.19   28.59
  -1  -5  21   27.55   27.33
   1   5 -21   -2.42   24.03
  -1  -5  20    8.26   37.04
  -1  -5  20   -6.78   26.77
   1   5 -20  -38.41   25.34
  -1  -5  19  -43.90   37.35
  -1  -5  19   13.94   27.94
   1   5 -19  -16.25   27.14
  -1  -5  18   37.27   36.06
  -1  -5  18   36.96   29.82
   1   5 -18   46.50   27.88
  -1  -5  17   42.51   35.10
  -1  -5  17   18.50   28.57
  -1  -5  17    6.60   28.74
   1   5 -17   12.24   28.14
  -1  -5  16  107.73   29.68
  -1  -5  16   51.39   30.71
   1   5 -16  124.37   26.75
  -1  -5  15  136.99   30.92
  -1  -5  15   69.83   28.38
   1   5 -15  135.16   26.29
  -1  -5  14  -14.28   29.81
  -1  -5  14    3.89   25.31
  -1  -5  14   27.03   28.96
   1   5 -14  -17.94   26.42
  -1  -5  13  -14.08   28.69
  -1  -5  13  -32.11   28.49
  -1  -5  13  -33.21   24.52
  -1  -5  13    5.72   28.20
   1   5 -13  -17.38   25.03
  -1  -5  12  -11.14   27.93
  -1  -5  12  -24.68   22.08
  -1  -5  12  -15.19   28.91
  -1  -5  12   -6.83   25.33
  -1  -5  12  -10.70   25.15
   1   5 -12   -8.71   23.96
  -1  -5  11   51.21   26.29
  -1  -5  11   80.95   23.40
  -1  -5  11   71.74   28.35
  -1  -5  11   57.05   22.76
  -1  -5  11   75.77   26.60
   1   5 -11   60.95   20.77
  -1  -5  10  438.21   31.21
  -1  -5  10  573.68   40.09
  -1  -5  10  687.79   49.67
  -1  -5  10  514.05   33.09
  -1  -5  10  594.09   40.95
   1   5 -10  473.27   37.29
  -1  -5   9  190.61   25.74
  -1  -5   9  210.33   26.00
  -1  -5   9  290.43   31.05
  -1  -5   9  181.66   22.66
  -1  -5   9  214.85   25.36
  -1  -5   8  886.26   56.66
  -1  -5   8  833.38   46.69
  -1  -5   8  705.38   46.75
  -1  -5   7  586.77   35.05
  -1  -5   7  766.90   58.87
  -1  -5   7  900.11   61.83
  -1  -5   7  666.36   45.70
  -1  -5   7  671.82   50.57
  -1  -5   6  424.97   27.79
  -1  -5   6  547.77   44.37
  -1  -5   6  560.13   45.22
  -1  -5   6  460.31   39.83
  -1  -5   5   62.92   23.19
  -1  -5   5  122.23   31.59
  -1  -5   5   82.73   26.74
  -1  -5   5  107.22   21.22
  -1  -5   4 2633.98  158.97
  -1  -5   4 2785.04  108.77
  -1  -5   4 2869.37  112.54
   1   5  -3 1513.22  113.22
   1   5  -2  212.58   52.84
   1   5  -2   81.68   32.58
   1   5  -1 1691.69  137.54
   1   5  -1 1696.05  148.55
   1   5   0  -31.81   27.15
   1   5   0   38.54   47.02
   1   5   1 2546.31  162.63
   1   5   1 2167.61  163.23
   1   5   1 2561.88  166.06
   1   5   2 1821.95  139.39
   1   5   2 1699.01  131.56
   1   5   2 2024.21  115.85
   1   5   3 1414.28   97.68
   1   5   3 1201.02   87.39
   1   5   4  203.65   39.98
   1   5   4  200.03   45.46
   1   5   5    3.34   30.75
   1   5   5   -2.68   37.05
   1   5   6    9.07   32.67
  -1  -5  -6   66.21   29.06
  -1  -5  -6  107.90   28.52
   1   5   7  -54.14   29.43
  -1  -5  -7   -7.07   31.20
  -1  -5  -7  -10.97   19.34
  -1  -5  -7  -36.52   26.27
   1   5   8  477.39   39.34
  -1  -5  -8  423.35   25.81
  -1  -5  -8  499.74   45.97
  -1  -5  -8  461.13   35.49
  -1  -5  -8  491.93   45.32
   1   5   9  668.84   48.25
  -1  -5  -9  632.01   36.92
  -1  -5  -9  637.83   58.71
  -1  -5  -9  682.24   47.24
   1   5   9  694.01   67.62
  -1  -5  -9  629.24   45.27
  -1  -5  -9  547.27   47.57
   1   5  10  -20.56   25.34
  -1  -5 -10   10.82   20.35
  -1  -5 -10   -7.54   29.30
  -1  -5 -10   -3.61   23.61
   1   5  10    9.75   39.21
  -1  -5 -10   13.20   21.96
   1   5  11 1304.63   68.20
  -1  -5 -11 1144.34   58.12
  -1  -5 -11 1106.30   76.38
  -1  -5 -11 1216.24   64.51
   1   5  11 1100.86   87.42
   1   5  12   47.55   24.70
  -1  -5 -12   41.95   24.07
  -1  -5 -12   41.23   27.57
  -1  -5 -12   64.57   25.31
   1   5  12   63.89   37.55
  -1  -5 -13  428.47   29.02
   1   5  13  420.10   35.16
  -1  -5 -13  403.35   32.05
   1   5  13  347.06   46.55
  -1  -5 -14   68.17   26.76
   1   5  14   18.82   33.50
  -1  -5 -14   29.27   28.16
  -1  -5 -15   20.26   28.01
   1   5  15  -44.57   41.47
  -1  -5 -15  -38.08   30.36
  -1  -5 -16  -14.79   28.58
   1   5  16  -55.80   32.47
  -1  -5 -16  -51.13   31.87
  -1  -5 -17 1466.27   75.68
  -1  -5 -17 1448.35   91.03
  -1  -5 -18   48.72   29.10
   1   5  18   30.81   34.31
  -1  -5 -18   20.90   37.38
  -1  -5 -19  535.00   40.86
   1   5  19  591.67   51.32
  -1  -5 -19  562.90   49.50
  -1  -5 -20    7.59   27.40
   1   5  20  -35.76   30.19
  -1  -5 -20   46.89   37.78
  -1  -5 -21   15.23   28.40
  -1  -5 -21   -6.39   38.34
  -1  -5 -22    1.09   25.07
  -1  -5 -22  -32.15   37.62
  -1  -5 -23   37.80   26.74
  -1  -5 -24   -5.15   25.89
  -1  -6  22  -12.31   35.51
   1   6 -22   13.68   21.66
  -1  -6  22   11.56   21.58
  -1  -6  21  -11.34   38.82
  -1  -6  21   -7.99   23.56
   1   6 -21   -9.28   22.50
  -1  -6  21   -8.59   24.19
   1   6 -21   -6.52   21.75
  -1  -6  20  -15.57   37.52
  -1  -6  20   -7.60   25.63
  -1  -6  20   -6.24   25.61
   1   6 -20  -12.38   23.62
  -1  -6  19   29.02   28.24
  -1  -6  19   32.20   26.84
   1   6 -19   23.28   24.30
  -1  -6  18  177.64   30.72
  -1  -6  18  136.31   26.89
   1   6 -18   98.37   26.14
  -1  -6  17   -3.20   30.70
  -1  -6  17   -5.95   27.51
  -1  -6  17   16.60   27.53
   1   6 -17  -21.90   23.99
  -1  -6  16   70.68   30.33
  -1  -6  16   44.98   29.29
  -1  -6  16   76.65   27.68
  -1  -6  16   85.54   28.32
   1   6 -16   24.81   25.55
  -1  -6  15   16.29   35.66
  -1  -6  15    3.63   31.62
  -1  -6  15  -15.01   30.22
  -1  -6  15  -20.39   28.67
   1   6 -15  -15.07   25.03
  -1  -6  14   28.75   35.36
  -1  -6  14  -34.13   34.24
  -1  -6  14  -26.95   28.97
  -1  -6  14  -24.52   28.71
   1   6 -14   -5.65   24.78
  -1  -6  13   -1.30   32.96
  -1  -6  13   -4.98   32.78
  -1  -6  13  -36.81   27.07
  -1  -6  13  -16.40   28.30
   1   6 -13  -28.56   23.63
  -1  -6  12  -17.22   32.51
  -1  -6  12  -11.61   32.64
  -1  -6  12   -5.09   24.41
  -1  -6  12   11.38   24.73
  -1  -6  11   63.00   32.35
  -1  -6  11   80.23   32.71
  -1  -6  11   69.68   24.85
  -1  -6  11   72.27   27.52
  -1  -6  10  294.15   33.71
  -1  -6  10  290.50   28.95
  -1  -6  10  431.81   34.73
  -1  -6  10  327.79   26.58
  -1  -6  10  345.69   30.14
  -1  -6   9  279.57   28.24
  -1  -6   9  351.43   33.30
  -1  -6   9  509.77   41.95
  -1  -6   9  380.61   27.79
  -1  -6   9  323.40   33.43
  -1  -6   8  116.41   28.70
  -1  -6   8  147.53   24.93
  -1  -6   8  178.25   30.80
  -1  -6   8  160.41   21.55
  -1  -6   8  144.01   24.94
  -1  -6   7   60.60   26.90
  -1  -6   7   73.06   24.39
  -1  -6   7  131.69   32.68
  -1  -6   7   98.93   25.47
  -1  -6   6  752.33   46.65
  -1  -6   6  976.03   68.14
  -1  -6   6  852.32   58.65
  -1  -6   5   -1.58   23.15
   1   6  -5   15.63   33.88
  -1  -6   5   19.39   20.63
  -1  -6   5   -4.58   24.45
   1   6  -4  655.35   63.71
  -1  -6   4  812.15   60.18
  -1  -6   4  656.54   31.67
  -1  -6   4  537.06   48.96
   1   6  -3 1647.54  113.85
  -1  -6   3 1775.54   64.32
  -1  -6   3 1453.68   92.02
   1   6  -2  422.19   55.79
  -1  -6   2  419.25   23.78
  -1  -6   2  359.72   46.33
   1   6  -1  750.40   89.06
  -1  -6   1  800.55   48.12
  -1  -6   1  760.47   82.35
   1   6   0  218.10   41.13
  -1  -6   0  203.09   33.48
  -1  -6   0  156.57   21.18
   1   6   1  473.93   65.11
  -1  -6  -1  572.90   57.36
   1   6   2 2876.77  152.09
  -1  -6  -2 3068.99  174.42
   1   6   3 1001.91   84.47
  -1  -6  -3 1008.96   87.09
   1   6   4  190.64   31.13
  -1  -6  -4  177.20   29.38
  -1  -6  -4  142.80   21.80
   1   6   5   58.21   28.20
  -1  -6  -5   69.47   31.09
  -1  -6  -5   49.30   15.98
   1   6   6   36.57   28.06
  -1  -6  -6   58.09   31.62
  -1  -6  -6   38.53   17.63
   1   6   7   -7.69   25.61
  -1  -6  -7   -9.64   32.53
  -1  -6  -7    9.35   19.30
   1   6   8    2.95   22.92
  -1  -6  -8    9.67   19.48
  -1  -6  -8  -15.64   30.74
  -1  -6  -8   -8.76   20.05
   1   6   9  113.29   25.37
  -1  -6  -9   80.95   22.00
  -1  -6  -9   90.21   31.50
   1   6   9   53.63   33.89
  -1  -6  -9   93.37   22.98
  -1  -6 -10   68.79   23.68
  -1  -6 -10   86.49   33.46
  -1  -6 -10   68.97   25.80
   1   6  10   64.95   35.52
  -1  -6 -11  458.92   29.27
  -1  -6 -11  517.80   44.72
  -1  -6 -11  565.69   36.68
   1   6  11  421.24   56.57
  -1  -6 -12  241.07   26.22
  -1  -6 -12  188.81   32.14
  -1  -6 -12  258.38   30.34
   1   6  12  208.38   38.69
  -1  -6 -13 2524.48   68.50
  -1  -6 -13 2183.81  134.22
  -1  -6 -13 2373.08  133.03
  -1  -6 -14 7455.40  107.46
   1   6  14 7571.95  134.83
  -1  -6 -14 6786.34  268.85
  -1  -6 -15  206.70   29.92
   1   6  15  210.08   35.44
  -1  -6 -15  246.30   31.17
  -1  -6 -16   14.63   29.23
   1   6  16  -26.08   36.16
  -1  -6 -16   71.39   31.85
  -1  -6 -17   47.29   28.68
   1   6  17   -4.03   38.81
  -1  -6 -17   35.75   34.09
  -1  -6 -18  407.30   34.11
   1   6  18  417.79   41.47
  -1  -6 -18  388.52   39.28
  -1  -6 -19   31.72   27.82
   1   6  19   16.66   32.38
  -1  -6 -19    8.62   35.59
  -1  -6 -20   30.72   28.61
  -1  -6 -20   10.49   39.01
  -1  -6 -21   18.78   28.02
  -1  -6 -21    0.42   35.70
  -1  -6 -22   -9.00   25.59
  -1  -6 -22  -24.49   35.22
  -1  -6 -23  -17.45   25.31
  -1  -6 -24    9.72   23.98
  -1  -6 -24   18.06   24.09
  -1  -7  20   -1.12   22.14
  -1  -7  19  -23.82   24.53
   1   7 -19  -12.53   22.75
  -1  -7  19   22.88   31.29
  -1  -7  18    8.19   35.97
  -1  -7  18   31.06   27.53
  -1  -7  18   -0.46   22.45
  -1  -7  18   28.73   28.38
  -1  -7  17   78.14   36.66
  -1  -7  17   56.79   31.17
  -1  -7  17   37.91   22.75
  -1  -7  17   87.74   28.77
  -1  -7  16   57.90   40.68
  -1  -7  16   -3.00   31.93
  -1  -7  16    1.58   24.03
  -1  -7  16   14.90   28.73
  -1  -7  15    7.89   37.30
  -1  -7  15   17.39   31.00
  -1  -7  15    1.30   31.78
  -1  -7  15    2.59   24.09
  -1  -7  15   22.37   28.89
  -1  -7  14   26.13   38.61
  -1  -7  14    8.10   34.70
  -1  -7  14    1.82   28.76
  -1  -7  14   11.90   23.38
  -1  -7  14   15.64   30.05
  -1  -7  13   21.47   38.46
  -1  -7  13    9.55   33.43
  -1  -7  13   14.13   27.74
  -1  -7  13    4.22   25.10
  -1  -7  13   46.68   30.09
  -1  -7  12   13.48   38.38
  -1  -7  12   10.58   34.28
  -1  -7  12  -11.90   26.16
  -1  -7  12   33.82   30.59
  -1  -7  11   16.63   36.86
  -1  -7  11   24.52   34.10
  -1  -7  11    2.01   26.78
  -1  -7  11   16.45   29.61
  -1  -7  10   19.85   36.57
  -1  -7  10   48.14   34.92
  -1  -7  10   16.18   24.17
  -1  -7  10    2.35   29.90
  -1  -7   9    7.61   34.68
  -1  -7   9   28.26   33.81
  -1  -7   9    6.85   29.70
  -1  -7   8  169.21   33.90
  -1  -7   8  201.83   34.39
  -1  -7   8  139.79   30.21
  -1  -7   7   18.70   32.98
   1   7  -7   73.20   27.03
  -1  -7   7   34.78   28.82
  -1  -7   7   65.00   31.71
  -1  -7   6   37.34   31.41
   1   7  -6   71.73   28.95
  -1  -7   6    8.99   22.38
  -1  -7   6    8.46   31.54
   1   7  -5 1466.66   93.19
  -1  -7   5 1613.21   67.91
  -1  -7   5 1467.70   95.72
  -1  -7   4  267.50   40.82
   1   7  -4  349.70   43.81
  -1  -7   4  332.96   63.80
  -1  -7   4  356.58   24.27
  -1  -7   4  301.51   39.67
  -1  -7   3  106.52   27.90
   1   7  -3  136.26   32.57
  -1  -7   3  138.98   21.64
  -1  -7   3  146.38   30.93
   1   7  -2  137.05   34.12
  -1  -7   2  166.22   20.86
  -1  -7   2  146.53   30.42
   1   7  -1  330.20   51.80
  -1  -7   1  328.70   22.77
  -1  -7   1  222.96   39.81
   1   7   0  319.08   40.40
  -1  -7   0  352.81   47.89
  -1  -7   0  322.23   28.94
  -1  -7   0  353.83   41.77
  -1  -7   0  267.26   42.91
   1   7   1   79.29   28.33
  -1  -7  -1   65.04   29.02
  -1  -7  -1   36.02   18.73
  -1  -7  -1   26.28   18.38
  -1  -7  -1   31.28   25.12
   1   7   2   24.79   27.61
  -1  -7  -2   31.66   31.56
  -1  -7  -2   14.95   17.77
  -1  -7  -2   15.92   16.26
  -1  -7  -2    1.84   20.32
   1   7   3   74.40   26.95
  -1  -7  -3   88.11   29.76
  -1  -7  -3   62.99   18.59
  -1  -7  -3   34.74   20.76
   1   7   4   26.75   23.79
  -1  -7  -4   43.54   30.44
  -1  -7  -4   38.94   16.67
  -1  -7  -4   17.13   19.93
   1   7   5  204.49   27.64
  -1  -7  -5  214.05   33.36
  -1  -7  -5  214.15   23.66
  -1  -7  -5  113.47   23.22
   1   7   6   17.00   22.69
  -1  -7  -6   44.80   32.69
  -1  -7  -6   41.31   21.84
   1   7   7  180.50   24.64
  -1  -7  -7  196.04   34.38
  -1  -7  -7  193.20   25.69
  -1  -7  -8   94.64   33.43
  -1  -7  -8  109.10   24.17
  -1  -7  -9   82.13   34.30
   1   7   9   40.36   34.71
  -1  -7  -9   74.80   31.70
  -1  -7 -10   19.50   25.56
  -1  -7 -10   48.96   33.11
  -1  -7 -10   46.36   27.54
  -1  -7 -11   89.91   25.80
  -1  -7 -11  132.90   33.43
  -1  -7 -11  105.26   25.97
  -1  -7 -12   39.32   27.83
  -1  -7 -12  -30.02   32.75
  -1  -7 -12   -5.37   25.91
  -1  -7 -13   23.01   26.84
  -1  -7 -13   75.34   34.07
  -1  -7 -13   40.33   28.72
  -1  -7 -14    1.95   28.95
   1   7  14  -32.39   36.30
  -1  -7 -14   22.42   29.53
  -1  -7 -15  439.60   37.29
   1   7  15  415.78   42.68
  -1  -7 -15  410.03   36.33
  -1  -7 -16  141.50   30.68
   1   7  16  137.92   36.47
  -1  -7 -16  165.01   33.63
  -1  -7 -17  316.94   33.15
   1   7  17  460.00   43.03
  -1  -7 -17  451.03   39.80
  -1  -7 -18   50.60   29.15
   1   7  18  -36.79   33.52
  -1  -7 -18    6.68   32.88
  -1  -7 -19   28.74   28.69
   1   7  19  -33.11   32.49
  -1  -7 -19  -29.64   36.36
  -1  -7 -20   20.76   25.92
  -1  -7 -20  -42.22   37.75
  -1  -7 -21   54.87   27.36
  -1  -7 -21   60.88   34.94
  -1  -7 -22   16.08   24.85
  -1  -7 -22   -0.14   31.84
  -1  -7 -23    9.65   23.69
   1   8 -20   26.99   24.43
  -1  -8  20    0.46   30.17
  -1  -8  19    7.14   33.11
  -1  -8  19   -9.69   21.77
   1   8 -19  -10.88   22.51
  -1  -8  19  -19.90   31.36
  -1  -8  18   -6.96   33.39
  -1  -8  18   12.90   23.33
   1   8 -18   13.91   26.48
  -1  -8  18   11.56   32.57
  -1  -8  17   17.70   36.43
  -1  -8  17   16.44   26.09
  -1  -8  17    5.85   32.97
  -1  -8  16    2.58   38.23
  -1  -8  16   -3.57   27.46
  -1  -8  16   16.03   31.19
  -1  -8  15   12.11   40.65
  -1  -8  15  -19.94   28.00
  -1  -8  15   41.11   34.11
  -1  -8  14  -13.08   37.91
  -1  -8  14   -3.12   31.80
  -1  -8  14  -10.90   29.84
  -1  -8  14    5.91   34.94
  -1  -8  13   -9.54   38.23
  -1  -8  13   56.23   31.77
  -1  -8  13    3.84   30.71
  -1  -8  13   27.28   35.93
  -1  -8  12  102.21   39.21
  -1  -8  12  117.76   35.22
  -1  -8  12   95.31   28.51
  -1  -8  12  168.31   34.92
  -1  -8  11   -7.12   42.43
  -1  -8  11    6.02   36.52
  -1  -8  11    4.27   27.65
  -1  -8  11    1.17   35.14
  -1  -8  10   -8.78   40.97
  -1  -8  10  -49.82   34.30
  -1  -8  10    1.70   35.07
  -1  -8   9  906.85   61.41
  -1  -8   9 1332.19   53.83
  -1  -8   9 1078.81   56.10
  -1  -8   8  184.89   37.87
  -1  -8   8  193.70   27.10
  -1  -8   7  142.60   36.07
  -1  -8   7  170.89   34.98
  -1  -8   7  132.77   26.02
  -1  -8   7  157.77   36.05
  -1  -8   6  -26.31   32.09
  -1  -8   5  715.56   68.65
  -1  -8   5 1082.80   75.21
  -1  -8   5  909.64   62.25
  -1  -8   5  881.24   70.24
   1   8  -4 1286.85   91.76
  -1  -8   4 1517.24   95.23
  -1  -8   4 1378.53   72.92
  -1  -8   4 1215.75   89.55
   1   8  -3   -6.30   31.37
  -1  -8   3  -52.34   25.87
  -1  -8   3  -39.87   34.54
   1   8  -2   -0.56   28.77
  -1  -8   2   -4.45   24.63
  -1  -8   2   -1.83   31.98
   1   8  -1   88.04   26.36
  -1  -8   1   97.82   23.92
  -1  -8   1   87.33   30.08
   1   8   0   51.03   26.15
  -1  -8   0   71.11   23.20
  -1  -8   0   75.11   19.06
  -1  -8   0   71.02   26.73
   1   8   1  345.05   41.85
  -1  -8  -1  479.79   49.09
  -1  -8  -1  385.71   40.21
  -1  -8  -1  409.07   40.75
  -1  -8  -1  274.81   37.18
   1   8   2   45.92   28.46
  -1  -8  -2   50.40   32.20
  -1  -8  -2   18.78   21.83
  -1  -8  -2   38.26   17.78
  -1  -8  -2   28.04   21.64
  -1  -8  -3   26.03   30.21
  -1  -8  -3   28.30   18.50
  -1  -8  -3   11.26   21.61
  -1  -8  -4  -20.62   33.70
  -1  -8  -4   -2.62   19.25
  -1  -8  -4  -26.81   22.79
  -1  -8  -5  -18.65   33.94
  -1  -8  -5  -14.02   21.08
  -1  -8  -5  -29.69   26.71
  -1  -8  -6   70.91   35.99
  -1  -8  -6   46.28   22.91
  -1  -8  -7   14.77   35.14
  -1  -8  -7  -21.36   23.41
  -1  -8  -8  140.60   33.47
  -1  -8  -8  204.30   27.76
  -1  -8  -9   61.18   37.94
  -1  -8 -10   72.03   34.85
  -1  -8 -10   87.25   32.66
  -1  -8 -11 2852.81  150.79
  -1  -8 -11 3613.80   86.45
  -1  -8 -12 3613.29  100.43
  -1  -8 -13  521.70   43.96
  -1  -8 -13  560.40   42.54
  -1  -8 -13  688.47   47.48
  -1  -8 -14  -11.21   27.48
   1   8  14  -31.98   34.57
  -1  -8 -14  -10.02   28.49
  -1  -8 -15   45.79   30.45
   1   8  15   -8.23   34.59
  -1  -8 -15   52.21   29.42
  -1  -8 -16  -22.96   26.80
   1   8  16  -24.49   33.22
  -1  -8 -16   19.53   31.44
  -1  -8 -17   26.97   27.88
   1   8  17    6.97   30.96
  -1  -8 -17   25.26   30.09
  -1  -8 -18    9.11   24.97
   1   8  18  -10.05   31.40
  -1  -8 -18  -21.24   33.77
  -1  -8 -19   16.97   25.98
   1   8  19   33.11   27.96
  -1  -8 -19   16.32   32.59
  -1  -8 -20   14.78   24.50
  -1  -8 -20   51.57   33.56
  -1  -8 -21   27.22   23.97
  -1  -8 -21   21.07   31.86
   1   9 -18   22.54   25.53
  -1  -9  18   12.00   21.01
   1   9 -18   10.96   24.02
  -1  -9  18   11.07   29.57
   1   9 -17   33.08   25.02
  -1  -9  17    9.83   22.48
   1   9 -17   55.61   27.46
  -1  -9  17   35.81   32.95
  -1  -9  16   18.71   30.58
  -1  -9  16   -2.37   24.62
  -1  -9  16   -1.78   31.65
  -1  -9  15   22.09   32.69
  -1  -9  15   -2.35   24.86
  -1  -9  15   43.75   33.50
  -1  -9  14   -5.80   34.50
  -1  -9  14   -6.69   27.60
  -1  -9  14   -3.45   35.05
  -1  -9  13   49.36   35.18
  -1  -9  13  -17.41   29.96
  -1  -9  13    4.24   35.40
  -1  -9  12   -2.20   36.52
  -1  -9  12   35.43   31.82
  -1  -9  12   74.28   37.28
  -1  -9  11    4.75   35.44
  -1  -9  11  -18.17   30.11
  -1  -9  11   -1.36   38.09
  -1  -9  10  101.69   35.36
  -1  -9  10  129.69   32.37
  -1  -9  10  150.20   37.20
  -1  -9   9   62.05   34.38
  -1  -9   9   49.86   32.76
  -1  -9   9   75.86   30.37
  -1  -9   9   82.72   37.37
  -1  -9   8   25.64   32.42
  -1  -9   8  -39.69   35.11
  -1  -9   8   14.82   31.13
  -1  -9   8  -62.44   37.54
  -1  -9   7  225.64   52.53
  -1  -9   7  309.00   52.69
  -1  -9   7  330.49   57.48
  -1  -9   6 1369.12   76.20
  -1  -9   6 1325.91   66.39
  -1  -9   6 1193.81   82.95
  -1  -9   5  110.43   30.19
  -1  -9   5   52.79   36.70
  -1  -9   4   21.78   31.37
  -1  -9   4   15.60   28.90
  -1  -9   4   13.49   32.09
  -1  -9   3   55.66   27.66
  -1  -9   3   33.60   32.09
  -1  -9   2   17.31   26.11
  -1  -9   2    3.74   29.63
  -1  -9   1   89.44   28.32
  -1  -9   1   45.11   27.14
  -1  -9   0  160.84   27.81
  -1  -9   0   98.06   25.65
  -1  -9  -1   82.40   34.65
  -1  -9  -1   46.55   23.45
  -1  -9  -2   92.61   32.04
  -1  -9  -2   82.25   20.47
  -1  -9  -2   31.39   22.56
  -1  -9  -3  268.37   37.24
  -1  -9  -3  247.04   24.79
  -1  -9  -3  161.23   27.91
  -1  -9  -4  119.70   34.07
  -1  -9  -4   78.47   22.44
  -1  -9  -4   42.92   27.35
  -1  -9  -5   63.68   37.02
  -1  -9  -5   34.08   23.77
  -1  -9  -6   50.47   37.78
  -1  -9  -6   38.63   25.91
  -1  -9  -7   -4.72   37.54
  -1  -9  -7   -5.86   27.26
  -1  -9  -8   48.35   36.61
  -1  -9  -9    5.11   36.09
  -1  -9 -10   53.15   35.12
  -1  -9 -10   64.01   31.60
  -1  -9 -11   49.48   33.13
  -1  -9 -11   64.49   30.41
  -1  -9 -12    2.75   31.72
  -1  -9 -12   11.34   28.36
  -1  -9 -13  -18.92   30.42
   1   9  14   57.08   36.45
  -1  -9 -14   93.96   30.36
   1   9  15  -15.66   31.46
  -1  -9 -15   33.58   30.04
   1   9  16   99.74   33.44
  -1  -9 -16  130.05   31.38
   1   9  17  -12.51   30.75
  -1  -9 -17  -10.50   31.45
   1   9  18   10.06   28.74
  -1  -9 -18   -1.26   33.94
  -1  -9 -19  -24.16   32.45
  -1  -9 -20   16.05   30.07
   1  10 -16   38.83   21.41
  -1 -10  16    3.20   21.76
   1  10 -16   24.33   28.35
  -1 -10  16   12.40   26.86
   1  10 -15   54.47   20.78
  -1 -10  15   42.68   23.21
   1  10 -15   47.29   30.98
  -1 -10  15   28.26   27.63
   1  10 -14    1.24   21.94
  -1 -10  14    2.88   25.38
  -1 -10  14   23.77   30.23
   1  10 -13   28.09   22.48
  -1 -10  13    4.83   26.81
  -1 -10  13    5.36   29.16
   1  10 -12   59.82   23.12
  -1 -10  12   56.72   28.10
  -1 -10  12   56.30   32.14
   1  10 -11  292.75   25.60
  -1 -10  11  382.64   33.09
  -1 -10  11  327.41   35.93
   1  10 -10   31.78   25.17
  -1 -10  10  -11.41   29.40
  -1 -10  10  -14.67   34.00
   1  10  -9  134.56   22.64
  -1 -10   9  158.87   32.61
  -1 -10   9  115.58   34.98
   1  10  -8    1.50   21.64
  -1 -10   8  -69.30   30.01
  -1 -10   8  -42.59   34.03
  -1 -10   7  183.37   32.92
  -1 -10   7  150.69   31.74
  -1 -10   6  330.21   36.50
  -1 -10   6  197.55   31.96
  -1 -10   5  -23.65   31.65
  -1 -10   5  -14.34   29.10
  -1 -10   4   14.76   31.29
  -1 -10   4   28.10   29.53
  -1 -10   3  105.56   26.33
  -1 -10   2   88.49   26.55
  -1 -10   1   11.01   24.84
  -1 -10   0   52.31   24.80
  -1 -10  -1    1.55   32.54
  -1 -10  -1    3.84   27.50
  -1 -10  -2   69.64   35.89
  -1 -10  -2   44.73   28.09
  -1 -10  -3   44.61   37.72
  -1 -10  -3   22.96   29.25
  -1 -10  -4   18.92   37.98
  -1 -10  -4   38.63   25.86
  -1 -10  -5  246.97   38.55
  -1 -10  -5  200.12   28.49
  -1 -10  -6  156.71   37.19
  -1 -10  -6  149.08   29.41
  -1 -10  -7  157.34   37.68
  -1 -10  -8  197.75   35.05
  -1 -10  -9  340.67   40.09
  -1 -10 -10  557.77   44.34
  -1 -10 -11    4.40   32.28
  -1 -10 -11   48.95   29.28
  -1 -10 -12   85.86   30.50
  -1 -10 -12   73.41   29.00
   1  10  13  -14.55   33.40
  -1 -10 -13   32.62   29.69
   1  10  14  -22.61   31.11
  -1 -10 -14  -19.45   27.16
   1  10  15  -28.04   32.76
  -1 -10 -15  -17.12   30.80
   1  10  16   -0.91   29.58
  -1 -10 -16    2.63   31.77
   1  10  17   29.55   28.43
  -1 -10 -17   -3.06   31.35
  -1 -10 -18   14.02   30.76
  -1 -11  13    0.68   24.18
   1  11 -13    1.63   30.95
  -1 -11  13   -4.24   20.72
  -1 -11  12    9.23   25.67
  -1 -11  12    9.60   23.16
  -1 -11  11   12.72   25.73
  -1 -11  11  -13.24   23.55
  -1 -11  10   77.90   27.13
  -1 -11  10   44.81   23.52
  -1 -11   9   -6.00   28.74
  -1 -11   9  -19.85   26.15
  -1 -11   8  186.21   32.08
  -1 -11   8   84.31   24.96
  -1 -11   7  -45.28   31.70
  -1 -11   7  -12.78   24.66
  -1 -11   6  160.70   33.46
  -1 -11   6   99.07   27.12
  -1 -11   5   -0.91   32.85
  -1 -11   5   -2.71   24.18
  -1 -11   4   72.58   31.72
  -1 -11   4    9.20   25.54
  -1 -11   3   39.07   25.52
  -1 -11   2   85.75   26.02
   1  11  -1  -38.48   30.38
  -1 -11   1    6.71   26.46
   1  11   0   57.42   30.14
  -1 -11   0   51.45   27.62
  -1 -11  -1  235.18   36.08
  -1 -11  -2   68.24   37.56
  -1 -11  -3    0.25   34.28
  -1 -11  -4   21.32   34.50
  -1 -11  -5   21.36   33.81
  -1 -11  -6    9.66   37.42
  -1 -11  -7  217.50   33.79
  -1 -11  -8  143.98   34.88
  -1 -11  -9  153.69   34.04
  -1 -11 -10   25.91   32.44
  -1 -11 -11   70.10   32.85
  -1 -11 -11   91.36   29.19
   1  11  12    9.13   35.30
  -1 -11 -12   20.09   31.58
   1  11  13  132.92   33.02
   1  11  14  -12.70   31.63
  -1 -11 -14  -18.81   28.38
   1  11  15    5.61   29.55
  -1 -11 -15   21.25   28.57
  -1 -12  10    5.21   26.36
   1  12 -10    7.99   30.08
  -1 -12  10  -56.83   19.71
  -1 -12   9   38.94   28.50
   1  12  -9   24.75   29.61
  -1 -12   9   53.12   20.23
  -1 -12   8    4.78   28.26
   1  12  -8  -23.12   29.04
  -1 -12   8  -17.94   19.95
  -1 -12   7    0.65   28.04
   1  12  -7  -10.28   29.92
  -1 -12   7    9.89   21.55
  -1 -12   6   -1.22   31.08
   1  12  -6   -6.37   29.15
  -1 -12   6    5.80   22.80
  -1 -12   5   92.42   34.44
   1  12  -5   28.51   29.83
  -1 -12   5   26.73   22.92
  -1 -12   4  -18.19   32.49
   1  12  -4  -48.26   27.91
  -1 -12   3   67.50   32.93
   1  12  -3   -2.07   25.93
   1  12  -2   -2.85   25.03
  -1 -12  -2   -8.45   30.73
  -1 -12  -3   50.50   34.35
  -1 -12  -4  172.02   36.20
  -1 -12  -5   59.16   33.54
  -1 -12  -5  100.62   32.22
  -1 -12  -6   25.39   34.63
  -1 -12  -6   22.08   31.40
  -1 -12  -7    1.99   33.04
  -1 -12  -8   -7.36   29.43
  -1 -12  -9   55.19   30.32
   1  12  11   21.22   31.60
  -1 -12 -11   68.49   27.38
   1  12  12   20.38   30.30
  -1 -12 -12   20.77   28.51
  -1 -13   4  146.68   29.28
  -1 -13   3  104.88   31.34
  -1 -13   0   53.04   27.73
  -1 -13  -1   36.73   28.87
  -1 -13  -2   35.27   29.40
  -1 -13  -2   35.61   28.02
  -1 -13  -3    3.59   29.43
  -1 -13  -3   25.50   27.75
  -1 -13  -4    3.32   28.01
  -1 -13  -4  -13.07   28.26
  -1 -13  -5   17.52   28.72
  -1 -13  -5    5.78   27.23
  -1 -13  -6   -1.51   28.96
  -1 -13  -6   -0.90   27.82
   2 -12  -9    1.35   21.01
  -2  12   8   96.78   35.21
   2 -12  -8   90.46   23.67
  -2  12   7   68.71   35.89
   2 -12  -7   56.78   25.67
  -2  12   7   39.91   25.99
   2 -12  -6   25.75   27.03
  -2  12   6   49.83   34.91
   2 -12  -5  151.03   30.18
  -2  12   5  134.15   28.99
   2 -12  -4    8.68   28.92
   2 -12  -4  -10.37   28.69
   2 -12  -4   -2.35   31.56
   2 -12  -3   21.55   27.84
   2 -12  -3   38.49   30.82
   2 -12  -3   39.67   38.26
   2 -12  -2   -1.55   27.89
   2 -12  -2   22.07   29.64
   2 -12  -2   14.49   38.42
   2 -12  -1  -10.24   27.87
   2 -12  -1   22.37   28.74
   2 -12  -1   27.00   40.72
   2 -12   0   49.43   29.77
   2 -12   0   64.74   28.03
   2 -12   0   50.78   39.28
   2 -12   1   38.73   27.70
   2 -12   1   51.68   25.84
   2 -12   1   99.20   38.35
   2 -12   2   -5.45   28.81
   2 -12   2   16.85   24.76
   2 -12   2    7.31   36.89
   2 -12   3    2.89   28.26
  -2  12  -3   18.65   22.73
   2 -12   3   35.99   23.87
   2 -12   3   31.98   34.66
   2 -12   4   15.14   27.00
  -2  12  -4    8.27   23.65
   2 -12   4   11.59   22.17
   2 -12   4   19.62   33.18
   2 -12   5    8.47   26.73
  -2  12  -5    7.11   24.84
   2 -12   5   17.46   20.05
   2 -12   5   15.25   31.90
   2 -12   6  -10.11   24.83
  -2  12  -6   11.52   25.08
   2 -12   6    3.10   18.94
   2 -12   6   15.42   30.22
   2 -12   7   48.95   24.45
  -2  12  -7   39.10   25.95
   2 -12   7    6.28   28.48
   2 -12   8   -2.76   23.10
  -2  12  -8   38.39   27.48
   2 -12   8   20.17   26.99
  -2  12  -9   -3.55   27.31
   2 -12   9   -3.73   26.49
  -2  12 -10  -14.75   26.54
   2 -12  10   14.95   25.43
  -2  11  13   33.90   39.33
  -2  11  12    3.83   38.42
   2 -11 -12   11.91   24.22
   2 -11 -11   23.41   24.54
   2 -11 -10   11.65   24.93
  -2  11  10  -15.24   27.67
   2 -11  -9   30.78   27.51
  -2  11   9   30.08   29.47
   2 -11  -8   54.16   29.73
  -2  11   8   53.39   30.00
   2 -11  -7   52.49   33.62
   2 -11  -7  -20.46   31.23
   2 -11  -7   10.51   35.07
  -2  11   7   -5.42   30.92
   2 -11  -6    2.74   33.91
   2 -11  -6  -14.41   31.52
   2 -11  -6    0.63   33.00
   2 -11  -5   -0.95   34.20
   2 -11  -5   -1.44   32.48
   2 -11  -5  -39.63   40.62
   2 -11  -4  113.65   33.84
   2 -11  -4  143.82   31.79
   2 -11  -4  119.69   43.18
   2 -11  -3   14.25   34.18
   2 -11  -3   52.97   29.62
   2 -11  -3   33.36   43.92
   2 -11  -2   -1.64   33.14
   2 -11  -2  -14.66   28.24
   2 -11  -2   37.96   41.64
   2 -11  -1  -33.98   32.93
   2 -11  -1   19.12   27.48
   2 -11  -1    4.93   36.67
   2 -11   0  152.63   31.03
   2 -11   0  140.71   27.82
   2 -11   0  106.86   37.74
   2 -11   1  298.65   33.58
  -2  11  -1  175.07   26.61
   2 -11   1  240.79   28.04
   2 -11   1  176.58   35.53
   2 -11   2  153.75   32.42
  -2  11  -2  113.00   26.00
   2 -11   2  137.53   27.40
   2 -11   2   85.68   30.38
   2 -11   3  -55.22   30.87
  -2  11  -3  -10.54   24.90
   2 -11   3   -0.61   26.47
   2 -11   3    8.39   30.23
   2 -11   4  -12.82   30.08
  -2  11  -4  -32.82   27.75
   2 -11   4  -12.10   25.61
   2 -11   4    5.40   28.93
   2 -11   5   10.57   29.17
  -2  11  -5  -13.93   27.91
   2 -11   5   23.17   25.59
   2 -11   5   11.19   25.90
   2 -11   6   11.70   29.65
  -2  11  -6  -28.85   27.49
   2 -11   6   -6.27   26.48
   2 -11   6    1.26   25.39
   2 -11   7    6.98   28.02
  -2  11  -7  -16.47   30.54
   2 -11   7   14.65   23.01
   2 -11   7   18.07   26.70
  -2  11  -8    6.10   24.25
   2 -11   8   -1.33   25.69
  -2  11  -8   -7.29   30.84
   2 -11   8  -14.57   24.23
   2 -11   8    9.02   27.14
  -2  11  -9  -19.55   24.65
   2 -11   9   -1.31   24.48
  -2  11  -9  -26.10   30.85
   2 -11   9    1.50   22.68
   2 -11   9    6.83   26.88
  -2  11 -10   -8.91   28.97
   2 -11  10   32.36   23.07
  -2  11 -10   11.55   30.44
   2 -11  10   36.58   21.89
   2 -11  10  -18.13   26.82
  -2  11 -11  269.44   26.89
  -2  11 -11  357.04   30.06
   2 -11  11  269.06   22.86
   2 -11  11  223.60   27.42
  -2  11 -12  161.49   25.77
   2 -11  12  106.74   25.69
  -2  11 -13   38.26   25.02
   2 -11  13   27.60   24.28
  -2  11 -14  144.70   25.26
  -2  11 -14  136.72   26.38
   2 -11  14  116.62   24.91
  -2  10  15  -14.14   38.98
  -2  10  13   45.07   39.20
   2 -10 -13   10.26   25.53
  -2  10  13   18.09   27.22
  -2  10  12   50.62   40.89
   2 -10 -12   -2.84   25.68
  -2  10  12  -33.46   29.56
   2 -10 -11   -2.79   27.21
  -2  10  11  -18.89   30.75
   2 -10 -10  -16.75   29.07
  -2  10  10    5.35   29.67
   2 -10  -9  -29.61   29.58
  -2  10   9  -10.08   30.66
   2 -10  -8   94.30   32.19
   2 -10  -8  114.80   35.22
  -2  10   8   71.59   32.70
   2 -10  -7  270.54   38.77
   2 -10  -7  179.80   43.63
   2 -10  -6   15.54   35.01
   2 -10  -6   39.01   31.01
   2 -10  -6   -1.87   44.65
   2 -10  -5  111.69   35.76
   2 -10  -5  114.02   29.74
   2 -10  -5   71.56   43.94
   2 -10  -4  109.88   35.35
   2 -10  -4  138.18   31.43
   2 -10  -4  112.31   42.86
   2 -10  -3  153.97   36.16
   2 -10  -3  149.49   27.99
   2 -10  -3   75.24   44.35
   2 -10  -2  100.64   34.24
   2 -10  -2   64.28   27.53
   2 -10  -2   58.08   38.76
   2 -10  -1  122.47   34.27
  -2  10   1   56.15   25.59
   2 -10  -1  115.36   29.72
   2 -10  -1   66.76   35.71
   2 -10   0   52.05   33.44
  -2  10   0  -15.49   25.90
   2 -10   0   29.95   29.29
   2 -10   0   18.38   35.34
   2 -10   1   46.37   35.67
  -2  10  -1  -23.11   28.03
   2 -10   1   17.55   27.93
   2 -10   1   12.43   33.38
   2 -10   2  -11.25   31.91
  -2  10  -2  -22.11   27.08
   2 -10   2   16.94   28.17
   2 -10   2   28.54   28.61
   2 -10   3  -62.04   33.17
  -2  10  -3  -37.42   30.24
   2 -10   3   -0.14   28.79
   2 -10   3    0.44   30.58
  -2  10  -4   23.71   27.54
   2 -10   4  -18.76   31.82
  -2  10  -4   -8.85   31.85
   2 -10   4   -1.16   31.81
   2 -10   4   27.30   27.61
  -2  10  -5    8.65   25.79
   2 -10   5  -18.40   30.92
  -2  10  -5   -7.86   30.90
   2 -10   5    3.28   32.49
   2 -10   5    3.56   29.65
  -2  10  -6   21.00   26.57
   2 -10   6   -0.07   27.17
  -2  10  -6    3.80   32.26
   2 -10   6   15.19   32.43
   2 -10   6    7.73   28.56
  -2  10  -7   13.21   26.18
   2 -10   7  -23.64   28.52
  -2  10  -7   -1.00   34.46
   2 -10   7  -21.52   31.92
   2 -10   7   15.53   29.44
  -2  10  -8   36.71   27.05
   2 -10   8   20.32   29.29
  -2  10  -8   -0.05   32.36
   2 -10   8    2.16   32.28
   2 -10   8   25.60   31.59
  -2  10  -9  -10.26   30.70
   2 -10   9  -22.39   27.00
  -2  10  -9  -75.30   34.68
   2 -10   9  -43.12   31.41
   2 -10   9  -23.26   30.52
  -2  10 -10  341.03   33.34
   2 -10  10  299.79   27.31
   2 -10  10  410.67   40.69
   2 -10  10  241.66   34.06
  -2  10 -11  443.01   32.15
   2 -10  11  340.47   27.32
   2 -10  11  503.34   34.16
   2 -10  11  400.94   36.99
  -2  10 -12  242.19   29.12
   2 -10  12  285.52   30.12
   2 -10  12  173.03   34.15
  -2  10 -13   12.50   26.63
  -2  10 -13  -12.43   29.04
   2 -10  13    9.92   25.30
  -2  10 -14  208.75   29.79
  -2  10 -14  193.01   28.17
   2 -10  14  174.62   24.58
  -2  10 -15  295.34   29.79
  -2  10 -15  257.94   25.71
   2 -10  15  251.95   24.34
  -2  10 -16   20.65   25.47
  -2  10 -16   22.10   22.67
  -2  10 -17   41.54   26.23
   2  -9 -17   57.22   27.09
  -2   9  17   79.39   35.71
   2  -9 -16   13.43   25.68
  -2   9  16   36.02   39.84
  -2   9  16    8.93   25.22
   2  -9 -15   -2.22   26.72
  -2   9  15    6.92   40.23
  -2   9  15   -2.94   27.73
   2  -9 -14   -5.12   26.65
  -2   9  14   -6.09   40.51
   2  -9 -14  -10.93   25.97
  -2   9  14  -23.90   30.51
   2  -9 -13   51.48   26.62
  -2   9  13   25.19   38.26
   2  -9 -13   16.56   26.54
  -2   9  13   29.63   29.78
   2  -9 -12  171.21   27.63
  -2   9  12  265.58   39.80
   2  -9 -12  166.29   27.32
  -2   9  12  217.05   33.74
   2  -9 -11   16.07   25.26
   2  -9 -11  -21.36   28.02
  -2   9  11   11.10   31.95
   2  -9 -10   87.45   25.97
   2  -9 -10  100.64   30.20
  -2   9  10   80.45   33.04
   2  -9  -9  267.98   28.05
   2  -9  -9  400.55   39.77
   2  -9  -9  506.80   48.01
  -2   9   9  356.68   39.19
   2  -9  -8  674.04   49.04
   2  -9  -8  944.67   64.40
   2  -9  -8  824.42   68.30
   2  -9  -7   23.43   26.97
   2  -9  -7   99.28   33.88
   2  -9  -7   97.70   46.02
   2  -9  -6  835.54   60.36
   2  -9  -6  792.23   51.26
   2  -9  -6  607.11   58.03
   2  -9  -5   22.13   34.83
   2  -9  -5    5.79   29.65
   2  -9  -5   10.37   44.28
   2  -9  -4   27.21   35.23
   2  -9  -4    0.82   28.77
   2  -9  -4   12.28   41.80
   2  -9  -3  -21.70   37.40
   2  -9  -3    9.13   28.46
   2  -9  -3   -6.10   39.39
   2  -9  -2  198.37   37.74
  -2   9   2   96.30   25.74
   2  -9  -2  166.31   28.96
   2  -9  -2  120.40   36.26
   2  -9  -1  100.16   36.51
  -2   9   1   93.80   26.43
   2  -9  -1  128.95   29.89
   2  -9  -1   85.46   33.29
   2  -9   0   16.56   34.72
  -2   9   0   40.34   27.97
   2  -9   0   75.30   29.99
   2  -9   0   48.33   31.22
   2  -9   1   -3.48   33.91
  -2   9  -1   11.40   30.11
   2  -9   1   35.03   30.98
   2  -9   1   18.51   29.98
  -2   9  -2   30.29   28.91
   2  -9   2  -18.55   32.42
  -2   9  -2  -36.97   32.23
   2  -9   2   36.61   32.15
   2  -9   2   -3.51   29.51
  -2   9  -3    4.26   27.09
   2  -9   3  -19.06   31.26
  -2   9  -3  -32.73   31.55
   2  -9   3   11.25   36.61
   2  -9   3    8.52   30.28
  -2   9  -4   88.71   27.65
   2  -9   4   67.00   30.18
  -2   9  -4   43.05   33.54
   2  -9   4  123.29   35.33
   2  -9   4   49.74   30.47
  -2   9  -5  140.02   28.03
   2  -9   5  125.32   31.47
  -2   9  -5  112.69   34.83
   2  -9   5  141.65   35.51
   2  -9   5  104.87   32.12
  -2   9  -6   26.75   25.66
   2  -9   6  -17.46   29.98
  -2   9  -6   29.13   35.29
   2  -9   6   12.46   34.92
   2  -9   6   28.28   27.00
   2  -9   6   15.15   32.98
  -2   9  -7   34.51   25.67
   2  -9   7  -25.04   28.19
  -2   9  -7   12.24   32.44
   2  -9   7   11.07   35.13
   2  -9   7   -7.46   28.43
   2  -9   7  -10.65   33.51
  -2   9  -8   20.40   32.12
   2  -9   8    5.70   35.10
   2  -9   8    4.53   38.79
   2  -9   8   -3.94   33.40
   2  -9   8   -5.12   39.48
  -2   9  -9  473.31   44.39
   2  -9   9  448.70   41.51
   2  -9   9  594.74   60.79
   2  -9   9  456.01   48.00
   2  -9   9  442.07   51.03
  -2   9 -10  726.80   51.88
   2  -9  10  671.59   43.93
   2  -9  10  893.13   69.55
   2  -9  10  626.73   51.53
   2  -9  11   67.24   24.39
   2  -9  11   45.53   26.47
  -2   9 -12   53.57   26.97
   2  -9  12   -3.01   21.56
  -2   9 -12   34.97   30.64
   2  -9  12   45.37   31.95
   2  -9  12   29.02   25.55
  -2   9 -13   15.49   29.37
  -2   9 -13   59.00   28.71
   2  -9  13   14.93   29.69
   2  -9  13    0.76   24.66
  -2   9 -14  162.89   30.04
  -2   9 -14  157.59   27.25
   2  -9  14  158.89   28.40
   2  -9  14  106.91   25.70
  -2   9 -15  168.21   27.20
  -2   9 -15  169.18   27.93
   2  -9  15  161.56   28.20
   2  -9  15  108.34   24.04
  -2   9 -16   35.71   27.47
  -2   9 -16   24.82   27.22
   2  -9  16   23.63   25.74
   2  -9  16   -1.74   21.71
   2  -9  16   46.50   34.98
  -2   9 -17   18.61   25.86
  -2   9 -17   19.65   22.03
   2  -9  17   10.59   24.18
   2  -9  17    1.15   20.41
   2  -9  17   -8.66   31.71
  -2   9 -18   33.68   26.54
  -2   9 -18   16.70   20.84
   2  -9  18   26.06   23.49
   2  -9  18   13.89   29.38
  -2   9 -19   39.93   26.71
  -2   9 -19   17.91   18.29
   2  -9  19    3.69   26.44
   2  -8 -19    4.78   28.79
  -2   8  19   14.06   34.99
   2  -8 -18    6.75   28.15
  -2   8  18  -16.39   37.01
  -2   8  18   -1.15   24.99
   2  -8 -17    4.61   27.47
  -2   8  17  -38.13   38.00
  -2   8  17   13.89   28.15
   2  -8 -16   -6.57   30.99
  -2   8  16  -33.34   40.42
  -2   8  16  -25.44   29.23
   2  -8 -15   -0.39   28.52
  -2   8  15   17.27   41.94
   2  -8 -15  -27.15   27.92
  -2   8  15   -7.81   32.61
   2  -8 -14   15.26   29.22
  -2   8  14    5.26   39.12
   2  -8 -14  -13.66   27.67
  -2   8  14   -9.09   32.63
   2  -8 -13   20.59   28.49
  -2   8  13   -1.33   40.46
   2  -8 -13   34.64   27.02
  -2   8  13   16.93   33.25
   2  -8 -12   41.71   28.21
  -2   8  12  155.97   41.38
   2  -8 -12   19.45   28.90
  -2   8  12   24.19   31.63
   2  -8 -11  159.71   26.84
   2  -8 -11  192.72   30.95
  -2   8  11  231.22   32.69
   2  -8 -10   12.50   26.59
   2  -8 -10   16.03   31.38
   2  -8 -10   56.21   37.36
  -2   8  10   24.47   32.10
   2  -8  -9    9.56   27.03
   2  -8  -9   32.65   30.77
   2  -8  -9    8.25   35.44
   2  -8  -8   60.10   27.45
   2  -8  -8   80.00   32.92
   2  -8  -8   68.19   45.27
   2  -8  -7  362.41   29.61
   2  -8  -7  487.66   33.21
   2  -8  -7  378.00   47.95
   2  -8  -6  138.27   25.68
   2  -8  -6  169.56   38.54
   2  -8  -6  103.86   29.66
   2  -8  -6   94.75   45.69
   2  -8  -5 1059.00   56.65
   2  -8  -5 1202.04   66.18
   2  -8  -5 1120.60   62.02
   2  -8  -5  934.46   74.37
   2  -8  -4   22.99   21.81
   2  -8  -4   -9.51   37.55
   2  -8  -4   16.58   27.66
   2  -8  -4   13.83   38.59
   2  -8  -3  -28.01   36.99
   2  -8  -3    2.26   27.62
   2  -8  -3  -10.54   34.98
   2  -8  -2   46.66   35.58
  -2   8   2   33.86   24.47
   2  -8  -2   27.82   28.21
   2  -8  -2    4.39   32.40
   2  -8  -1   64.55   34.22
  -2   8   1   34.65   26.87
   2  -8  -1   34.78   30.64
   2  -8  -1   37.24   29.35
  -2   8   0  247.35   29.90
   2  -8   0  228.30   34.54
  -2   8   0  265.77   31.27
   2  -8   0  251.44   36.50
   2  -8   0  134.32   30.10
  -2   8  -1  130.98   27.03
   2  -8   1   99.82   31.74
  -2   8  -1   89.23   31.70
   2  -8   1  143.82   32.39
   2  -8   1  126.90   26.97
   2  -8   1   81.40   29.95
  -2   8  -2   56.96   27.00
   2  -8   2   61.79   30.72
  -2   8  -2   67.92   30.85
   2  -8   2   86.84   34.22
   2  -8   2   47.87   27.02
   2  -8   2   81.61   30.96
  -2   8  -3   77.54   26.91
   2  -8   3  102.46   29.57
  -2   8  -3  100.36   32.12
   2  -8   3  109.87   35.25
   2  -8   3   88.88   27.25
   2  -8   3   37.30   32.40
  -2   8  -4   -0.58   26.75
   2  -8   4  -10.59   27.65
   2  -8   4  -23.31   35.37
   2  -8   4  -12.37   26.30
   2  -8   4  -29.73   33.99
  -2   8  -5    6.97   26.78
   2  -8   5   -6.64   28.67
   2  -8   5   40.79   35.94
   2  -8   5   -4.49   26.77
   2  -8   5  -11.36   31.50
  -2   8  -6   68.38   25.03
   2  -8   6   63.53   26.77
   2  -8   6  124.41   35.84
   2  -8   6   86.62   27.19
   2  -8   6   47.54   35.95
  -2   8  -7  107.90   26.41
   2  -8   7   77.08   26.36
   2  -8   7  188.83   38.76
   2  -8   7  108.83   27.17
   2  -8   7   93.98   37.76
  -2   8  -8  184.83   35.04
   2  -8   8  150.75   37.46
   2  -8   8  159.33   29.68
  -2   8  -9  510.47   33.54
   2  -8   9  471.74   29.68
   2  -8   9  433.33   37.69
  -2   8 -10  348.99   34.27
   2  -8  10  285.29   32.51
   2  -8  10  266.04   29.37
   2  -8  11   49.22   25.93
   2  -8  11   19.42   38.43
  -2   8 -12 1338.74   73.87
   2  -8  12  990.41   54.92
  -2   8 -12 1393.92   74.84
   2  -8  12 1154.72   73.67
  -2   8 -13  140.02   29.82
   2  -8  13   88.68   21.49
  -2   8 -13  177.99   31.50
   2  -8  13   84.53   28.77
  -2   8 -14   22.20   28.59
  -2   8 -14   10.31   28.58
   2  -8  14  -14.42   26.67
   2  -8  14   52.80   42.84
  -2   8 -15    0.83   26.82
  -2   8 -15    4.87   27.38
   2  -8  15   37.22   26.61
   2  -8  15   38.18   37.73
  -2   8 -16   -5.16   26.36
  -2   8 -16   29.08   27.11
   2  -8  16  -12.94   25.31
   2  -8  16   18.79   36.01
  -2   8 -17   34.70   26.08
   2  -8  17   -7.14   24.20
   2  -8  17   17.72   37.51
  -2   8 -18   40.82   22.56
   2  -8  18   32.91   24.62
   2  -8  18   29.97   35.51
  -2   8 -19   11.16   19.73
   2  -8  19    7.89   23.21
   2  -8  19   -7.77   31.75
  -2   8 -20    3.93   23.41
   2  -8  20   -6.55   23.95
   2  -8  20  -13.23   22.48
   2  -8  20   -3.64   30.39
   2  -8  21    5.53   26.19
   2  -7 -21   16.31   29.01
  -2   7  21   10.72   28.86
   2  -7 -20   18.51   30.33
  -2   7  20   26.78   32.67
  -2   7  20   28.03   24.07
   2  -7 -19   22.52   28.67
  -2   7  19   -3.89   34.64
  -2   7  19   37.17   26.94
   2  -7 -18    5.51   29.91
  -2   7  18   -0.65   38.62
  -2   7  18   13.29   29.19
   2  -7 -17   -2.78   29.98
  -2   7  17   11.31   41.57
  -2   7  17    2.84   29.54
   2  -7 -16    5.90   30.28
  -2   7  16   -9.24   42.14
  -2   7  16  -32.79   32.47
   2  -7 -15  -14.15   27.45
  -2   7  15   10.93   41.30
   2  -7 -15   -9.17   29.23
  -2   7  15  -52.74   34.28
   2  -7 -14  100.97   30.76
  -2   7  14   55.14   41.45
   2  -7 -14   41.92   27.49
  -2   7  14  119.50   33.54
   2  -7 -13    8.70   28.40
  -2   7  13   17.13   41.84
   2  -7 -13    8.77   28.60
  -2   7  13   15.37   34.31
   2  -7 -12   54.00   28.00
  -2   7  12   87.39   37.59
   2  -7 -12   28.45   29.30
  -2   7  12   -4.69   34.05
   2  -7 -11  178.01   28.32
   2  -7 -11  150.45   31.30
   2  -7 -11  168.38   37.85
  -2   7  11  142.85   34.13
   2  -7 -10  351.69   30.64
   2  -7 -10  398.04   36.52
   2  -7 -10  368.77   37.54
  -2   7  10  331.66   34.56
   2  -7  -9   49.28   25.91
   2  -7  -9   24.29   29.69
   2  -7  -9   27.40   45.70
   2  -7  -8  799.53   49.64
   2  -7  -8  813.34   60.81
   2  -7  -8  717.50   64.12
   2  -7  -7   -6.83   23.31
   2  -7  -7   18.72   27.27
   2  -7  -7   -4.11   45.20
  -2   7   6  176.95   26.45
   2  -7  -6  204.04   25.21
   2  -7  -6  266.34   38.14
   2  -7  -6  239.12   30.83
   2  -7  -6  149.95   43.69
  -2   7   5   34.75   24.38
   2  -7  -5   56.15   19.98
   2  -7  -5   27.48   32.05
   2  -7  -5   90.31   25.66
   2  -7  -5  149.70   43.24
  -2   7   4   14.15   22.53
   2  -7  -4  -22.46   19.79
   2  -7  -4  -18.49   30.50
   2  -7  -4  -34.97   25.69
   2  -7  -4  -51.43   34.24
  -2   7   3   52.34   25.98
   2  -7  -3   56.84   19.14
   2  -7  -3   49.39   30.20
   2  -7  -3   51.92   24.14
   2  -7  -3   28.88   31.25
  -2   7   2  117.61   27.48
   2  -7  -2  159.70   19.28
   2  -7  -2  191.16   32.87
  -2   7   2  143.26   24.74
   2  -7  -2  198.33   29.43
   2  -7  -2  135.59   29.29
  -2   7   1    7.33   24.25
  -2   7   1   10.31   27.36
   2  -7  -1   17.42   30.77
  -2   7   1  -19.64   25.63
   2  -7  -1   18.93   29.80
   2  -7  -1   15.33   27.09
  -2   7   0   41.34   24.23
  -2   7   0   41.52   28.89
   2  -7   0   44.19   29.70
  -2   7   0   43.40   28.42
   2  -7   0   33.86   31.21
   2  -7   0   24.91   25.57
   2  -7   0    7.37   27.96
  -2   7  -1   -7.87   24.79
  -2   7  -1   18.31   29.59
   2  -7   1   -2.59   28.16
  -2   7  -1    1.42   27.92
   2  -7   1   20.25   31.46
   2  -7   1   -2.37   26.42
   2  -7   1   -7.16   28.72
  -2   7  -2  154.28   25.93
  -2   7  -2  151.32   33.27
   2  -7   2  174.11   28.41
   2  -7   2  227.02   33.85
   2  -7   2  184.52   30.55
   2  -7   2  146.58   32.22
  -2   7  -3   44.08   24.98
  -2   7  -3   79.06   30.69
   2  -7   3   47.20   26.09
   2  -7   3   71.02   33.15
   2  -7   3   56.28   26.29
   2  -7   3   70.28   33.20
  -2   7  -4  216.40   28.64
  -2   7  -4  176.09   35.05
   2  -7   4  223.41   26.62
   2  -7   4  245.36   33.52
   2  -7   4  214.19   27.87
   2  -7   4  166.07   32.08
  -2   7  -5   18.22   23.79
   2  -7   5  -11.24   26.00
   2  -7   5    5.52   25.08
   2  -7   5  -45.38   34.80
  -2   7  -6  256.33   28.87
   2  -7   6  229.35   35.41
   2  -7   6  205.39   28.03
  -2   7  -7  629.37   40.93
   2  -7   7  511.64   43.49
   2  -7   7  648.54   49.78
   2  -7   8  973.58   63.33
   2  -7   8  886.46   68.24
   2  -7   9  414.24   42.22
   2  -7   9  352.21   57.17
   2  -7   9  365.57   34.55
   2  -7  10  137.57   36.73
   2  -7  10  109.84   27.17
   2  -7  10  161.43   29.56
   2  -7  11  345.20   39.48
   2  -7  11  335.45   27.33
   2  -7  11  337.25   33.04
   2  -7  11  439.47   41.24
   2  -7  12  444.01   39.71
   2  -7  12  396.26   26.85
   2  -7  12  457.54   36.62
   2  -7  12  610.50   42.16
   2  -7  13  301.92   39.48
   2  -7  13  230.52   24.78
   2  -7  13  316.39   33.50
   2  -7  13  354.35   41.05
   2  -7  14   10.72   35.82
   2  -7  14   47.95   31.60
   2  -7  14   16.02   37.64
  -2   7 -15  105.18   29.71
   2  -7  15  104.09   32.28
   2  -7  15  142.16   37.98
  -2   7 -16   83.78   28.95
   2  -7  16   84.97   31.44
   2  -7  16   48.22   35.68
  -2   7 -17   39.58   25.95
   2  -7  17   34.77   30.18
   2  -7  17   58.58   34.38
  -2   7 -17   -9.35   22.89
  -2   7 -18   -7.35   24.49
  -2   7 -18   21.19   21.91
   2  -7  18  -24.73   28.67
   2  -7  18  -29.23   35.19
  -2   7 -19   26.78   25.02
  -2   7 -19   15.27   20.08
   2  -7  19   -4.75   26.58
   2  -7  19  -22.16   33.18
  -2   7 -20   25.59   23.41
   2  -7  20    1.98   24.97
   2  -7  20  -16.32   31.35
  -2   7 -21   17.23   21.55
   2  -7  21   16.17   25.27
   2  -7  21   34.72   31.93
  -2   7 -22   -3.75   20.76
   2  -7  22   10.39   22.86
   2  -7  22   -6.66   29.69
  -2   6  22  -11.87   26.71
   2  -6 -21   56.34   31.17
  -2   6  21   19.34   33.23
  -2   6  21   31.08   25.49
   2  -6 -20   23.81   29.97
  -2   6  20  -11.39   34.40
  -2   6  20    8.47   27.32
   2  -6 -19    2.00   27.90
  -2   6  19    4.25   38.80
  -2   6  19   -8.32   27.53
   2  -6 -18   45.20   30.30
  -2   6  18   37.05   41.06
  -2   6  18   36.93   31.80
   2  -6 -17  167.54   28.64
  -2   6  17  223.18   41.36
  -2   6  17  189.38   36.34
   2  -6 -16  355.17   33.07
  -2   6  16  492.13   48.34
  -2   6  16  404.60   40.66
   2  -6 -15   35.74   28.74
  -2   6  15   82.87   43.50
   2  -6 -15   81.17   33.58
  -2   6  15   44.61   38.18
   2  -6 -14   41.93   26.23
  -2   6  14   34.03   43.18
   2  -6 -14  -10.94   30.91
  -2   6  14   35.50   38.86
   2  -6 -13   -3.40   27.94
  -2   6  13   -1.83   41.68
   2  -6 -13  -38.26   27.86
  -2   6  13  -27.34   35.78
   2  -6 -12   35.82   27.57
  -2   6  12   79.07   40.26
   2  -6 -12   -3.11   28.85
  -2   6  12   61.78   35.04
   2  -6 -11    9.93   24.19
  -2   6  11   22.57   38.13
   2  -6 -11   -5.19   27.18
  -2   6  11   19.30   33.83
   2  -6 -10  198.88   25.67
   2  -6 -10  194.22   38.59
   2  -6 -10  254.05   32.94
  -2   6  10  168.58   37.21
  -2   6  10  217.23   33.95
  -2   6   9  189.73   26.82
   2  -6  -9  301.25   27.72
   2  -6  -9  291.86   34.32
  -2   6   9  187.25   35.71
  -2   6   8  115.58   25.07
   2  -6  -8  154.99   23.72
   2  -6  -8  111.85   46.15
  -2   6   7  488.16   38.03
   2  -6  -7  487.80   32.44
   2  -6  -7  585.88   52.59
  -2   6   6  248.01   27.52
   2  -6  -6  263.83   21.61
   2  -6  -6  329.72   34.61
   2  -6  -6  291.04   25.69
   2  -6  -6  246.49   42.63
  -2   6   5  742.76   52.49
   2  -6  -5  791.36   38.23
   2  -6  -5  866.73   57.35
   2  -6  -5  786.57   48.63
   2  -6  -5  594.58   63.65
  -2   6   4   42.81   28.02
   2  -6  -4   25.52   17.17
   2  -6  -4  101.35   33.32
   2  -6  -4   49.90   25.73
   2  -6  -4   22.12   31.30
  -2   6   3  265.29   31.07
   2  -6  -3  257.64   20.13
   2  -6  -3  277.31   30.89
   2  -6  -3  263.33   28.77
   2  -6  -3  197.96   29.38
  -2   6   2  537.54   45.98
  -2   6   2  484.41   42.44
   2  -6  -2  528.51   29.12
   2  -6  -2  640.84   51.92
  -2   6   2  510.27   36.99
   2  -6  -2  587.67   47.16
  -2   6   1    3.79   21.75
  -2   6   1   -1.13   32.67
   2  -6  -1   -2.04   16.98
   2  -6  -1  -35.00   29.58
  -2   6   1    0.61   23.51
   2  -6  -1   -1.76   30.36
   2  -6  -1  -10.70   24.26
   2  -6  -1   12.84   28.01
  -2   6   0    7.31   22.10
  -2   6   0   15.08   34.77
   2  -6   0   -7.42   17.10
   2  -6   0   -5.30   27.66
  -2   6   0  -24.70   25.55
   2  -6   0   -2.52   31.28
   2  -6   0  -21.95   24.33
   2  -6   0  -11.48   29.66
  -2   6  -1   36.47   24.00
  -2   6  -1   53.31   33.45
   2  -6   1   36.91   24.27
   2  -6   1   23.36   29.48
   2  -6   1   18.31   24.39
   2  -6   1   17.89   29.32
  -2   6  -2  564.60   49.99
   2  -6   2  611.14   40.65
   2  -6   2  763.74   71.11
   2  -6   2  570.28   62.02
   2  -6   2  575.06   59.48
  -2   6  -3    6.09   23.14
   2  -6   3   -1.97   24.07
   2  -6   3    1.13   23.58
  -2   6  -4   -8.25   23.63
   2  -6   4  -37.21   22.32
   2  -6   4    4.37   22.22
  -2   6  -5 1029.14   64.44
   2  -6   5 1075.84   56.34
   2  -6   5  848.98   59.86
   2  -6   6    6.70   30.31
   2  -6   6   18.97   22.84
   2  -6   7 1542.92   70.63
  -2   6  -7 1382.94   77.84
   2  -6   7 1393.06   65.16
   2  -6   7 1427.03   87.29
   2  -6   8  325.64   37.85
  -2   6  -8  335.70   34.29
   2  -6   8  313.46   51.54
   2  -6   8  280.09   29.75
   2  -6   8  307.09   33.65
   2  -6   9   -8.08   35.14
  -2   6  -9    9.41   27.91
   2  -6   9  -11.90   32.39
   2  -6   9  -19.29   25.00
   2  -6   9  -11.83   38.44
   2  -6  10 1057.15   51.92
  -2   6 -10  953.17   48.84
   2  -6  10 1010.64   43.76
   2  -6  10  961.28   59.90
   2  -6  10 1048.96   58.04
   2  -6  11  -13.23   38.62
   2  -6  11   -6.79   22.71
   2  -6  11  -28.28   28.42
   2  -6  11  -33.98   33.24
  -2   6 -11   -7.88   21.34
   2  -6  12  573.47   49.27
   2  -6  12  482.13   35.18
   2  -6  12  582.36   50.49
   2  -6  12  634.43   47.07
  -2   6 -12  490.45   43.78
   2  -6  13    9.15   31.47
   2  -6  13    3.97   30.19
  -2   6 -13   -4.09   24.55
   2  -6  14   30.03   32.25
   2  -6  14   -9.20   33.34
  -2   6 -14   -8.56   26.71
   2  -6  15   45.32   32.09
   2  -6  15   72.91   32.99
  -2   6 -15    5.48   25.48
   2  -6  16   86.31   36.95
  -2   6 -16   22.76   29.45
   2  -6  16   39.61   32.88
   2  -6  16   49.66   31.66
  -2   6 -16   20.08   26.17
   2  -6  17  -21.76   37.50
  -2   6 -17  -22.67   21.06
  -2   6 -17   -6.46   25.73
   2  -6  17   12.60   31.58
   2  -6  17   14.98   30.66
  -2   6 -17    1.08   25.88
   2  -6  18    7.01   35.55
  -2   6 -18    7.85   20.69
  -2   6 -18   12.45   21.39
   2  -6  18   54.59   32.74
   2  -6  18    2.72   29.88
  -2   6 -18   20.49   27.18
   2  -6  19    8.02   33.67
  -2   6 -19   33.78   21.17
  -2   6 -19   27.00   19.25
   2  -6  19   64.45   28.83
   2  -6  19   30.35   31.82
  -2   6 -19   43.83   26.40
  -2   6 -20   15.33   22.19
   2  -6  20    1.80   29.39
   2  -6  20  -20.90   31.12
  -2   6 -20  -16.82   24.48
  -2   6 -21    7.68   22.57
   2  -6  21   30.33   27.95
   2  -6  21    9.76   31.33
  -2   6 -21   -3.77   24.70
  -2   6 -22   19.39   20.23
   2  -6  22   -1.18   25.69
   2  -6  22    7.78   30.56
  -2   6 -22   -5.73   22.70
  -2   6 -23   -0.52   19.10
   2  -6  23   33.51   25.76
   2  -6  23   27.11   28.70
  -2   6 -23   16.23   22.57
   2  -5 -23    5.77   30.34
  -2   5  23   13.31   25.84
  -2   5  22   31.41   30.94
  -2   5  22   30.48   28.89
  -2   5  21  -33.92   36.04
  -2   5  21    3.61   28.69
  -2   5  20  -23.95   39.12
  -2   5  20  -24.37   31.11
  -2   5  19  -16.95   40.72
  -2   5  19   -8.76   32.39
  -2   5  18   -8.91   39.48
  -2   5  18   -4.99   34.90
  -2   5  17   76.28   44.97
  -2   5  17   65.00   34.66
   2  -5 -16   72.37   28.53
  -2   5  16   89.70   43.77
  -2   5  16  144.78   40.08
   2  -5 -15  143.79   28.59
  -2   5  15  199.28   44.57
   2  -5 -15   82.70   29.50
  -2   5  15  149.81   38.01
   2  -5 -14   80.68   27.45
  -2   5  14   63.41   42.43
   2  -5 -14   19.18   29.52
  -2   5  14  113.77   37.55
   2  -5 -13  -28.54   26.94
  -2   5  13    2.13   39.91
   2  -5 -13  -25.96   26.43
  -2   5  13  -28.65   39.66
   2  -5 -12    5.78   25.99
   2  -5 -12    0.07   26.55
  -2   5  12  -16.68   36.11
  -2   5  11   25.87   24.22
   2  -5 -11   30.48   27.32
  -2   5  11   38.29   32.83
   2  -5 -11   13.88   25.68
   2  -5 -11   81.20   32.00
  -2   5  11   41.43   33.46
  -2   5  10  -22.93   24.82
   2  -5 -10    2.30   23.43
   2  -5 -10  -18.30   31.63
   2  -5 -10  -24.16   26.10
  -2   5  10    1.39   36.22
  -2   5  10  -35.04   32.16
  -2   5   9  169.50   26.57
   2  -5  -9  171.35   23.15
   2  -5  -9  198.99   29.00
  -2   5   9  157.78   36.76
  -2   5   8  215.11   28.12
   2  -5  -8  205.92   21.70
   2  -5  -8  127.73   43.68
  -2   5   7  216.45   29.16
   2  -5  -7  243.91   22.50
   2  -5  -7  210.24   42.40
  -2   5   6  297.23   35.66
   2  -5  -6  238.04   19.28
   2  -5  -6  300.20   31.50
   2  -5  -6  264.05   40.62
  -2   5   5   73.39   33.76
   2  -5  -5  125.45   19.11
   2  -5  -5  150.80   32.01
   2  -5  -5   95.65   35.48
  -2   5   4 2199.81  116.98
   2  -5  -4 2191.59   80.50
   2  -5  -4 2529.11  119.24
  -2   5   3   -3.26   36.43
   2  -5  -3    9.36   20.37
   2  -5  -3  -20.73   28.70
   2  -5  -3  -48.04   30.56
  -2   5   2  336.49   36.59
   2  -5  -2  396.16   33.91
   2  -5  -2  398.70   39.89
   2  -5  -2  274.16   29.48
   2  -5  -1   71.59   26.60
   2  -5  -1   58.99   30.46
   2  -5  -1   17.37   27.69
   2  -5   0  718.34   64.35
   2  -5   0  450.34   58.08
   2  -5   1  -70.97   32.32
  -2   5  -3  624.97   45.73
   2  -5   4   81.48   26.85
   2  -5   5  623.12   38.93
  -2   5  -5  634.26   61.12
   2  -5   5  662.38   53.60
   2  -5   5  669.82   58.48
  -2   5  -5  690.43   77.41
   2  -5   6   45.32   30.47
  -2   5  -6   49.17   34.90
   2  -5   6   37.46   23.48
   2  -5   6   35.13   25.29
   2  -5   6   49.04   28.55
  -2   5  -6   16.80   26.61
   2  -5   7  184.85   36.22
  -2   5  -7  238.51   35.93
   2  -5   7  175.75   22.58
   2  -5   7  183.90   28.31
   2  -5   7  186.42   29.75
  -2   5  -7  187.91   27.47
   2  -5   8   67.05   36.62
  -2   5  -8   90.89   30.28
   2  -5   8   50.31   21.29
   2  -5   8   53.36   24.54
   2  -5   8   35.43   26.00
  -2   5  -8   52.43   22.87
  -2   5  -8   59.09   23.93
   2  -5   9  -24.68   37.38
  -2   5  -9   22.56   30.87
   2  -5   9   -7.57   21.40
   2  -5   9   16.57   25.11
   2  -5   9   -4.18   25.88
  -2   5  -9   -1.36   21.91
  -2   5  -9   10.71   20.73
  -2   5 -10   11.10   27.12
   2  -5  10    6.13   22.66
   2  -5  10   20.20   27.05
   2  -5  10   29.09   26.14
  -2   5 -10   19.86   22.90
  -2   5 -10   19.76   21.16
   2  -5  11   60.64   28.66
   2  -5  11   41.73   23.98
  -2   5 -11   41.85   22.87
  -2   5 -11   -0.12   19.49
   2  -5  12  287.38   33.40
   2  -5  12  346.92   34.40
   2  -5  12  301.68   30.60
  -2   5 -12  288.79   30.52
   2  -5  13   45.77   37.32
   2  -5  13    7.97   23.06
   2  -5  13   -0.82   33.60
   2  -5  13  -25.42   28.90
  -2   5 -13  -23.13   25.21
   2  -5  14  162.46   38.85
   2  -5  14  170.06   33.55
   2  -5  14  176.48   28.54
  -2   5 -14  172.50   27.30
   2  -5  15   13.59   35.63
   2  -5  15    5.07   33.17
   2  -5  15  -25.13   29.56
  -2   5 -15   -6.16   27.30
   2  -5  16  147.04   40.18
  -2   5 -16  135.68   28.59
   2  -5  16  214.88   34.45
   2  -5  16  175.35   28.29
  -2   5 -16  164.60   26.63
   2  -5  17  -15.38   41.07
  -2   5 -17   -7.32   22.34
  -2   5 -17   -0.73   26.26
   2  -5  17   12.78   32.85
   2  -5  17  -11.69   29.37
  -2   5 -17  -15.74   27.88
   2  -5  18    9.96   39.65
  -2   5 -18   26.75   22.89
  -2   5 -18   28.93   22.04
   2  -5  18   27.34   32.59
   2  -5  18   22.85   26.38
  -2   5 -18   30.99   27.41
   2  -5  19  -17.84   37.51
  -2   5 -19    2.13   25.13
   2  -5  19   32.11   30.48
   2  -5  19    6.57   25.59
  -2   5 -19    8.70   24.70
   2  -5  20  -13.64   39.63
  -2   5 -20   -5.44   22.36
   2  -5  20   -8.17   29.18
   2  -5  20    1.51   28.54
  -2   5 -20  -16.71   26.18
   2  -5  21  -25.02   38.47
  -2   5 -21    3.21   22.54
   2  -5  21    2.96   30.18
   2  -5  21   -0.02   27.91
  -2   5 -21   -2.89   25.38
  -2   5 -22   -2.38   22.46
  -2   5 -22   12.07   23.09
   2  -5  22  -19.26   29.36
   2  -5  22  -15.52   29.49
  -2   5 -22    2.15   23.59
  -2   5 -23  -20.41   19.75
  -2   5 -23    4.23   22.08
   2  -5  23   -8.69   27.38
   2  -5  23   15.10   29.69
  -2   5 -23   -1.39   23.50
  -2   5 -24    4.45   17.82
  -2   5 -24   13.88   20.91
   2  -5  24   29.79   25.75
   2  -5  24   44.63   30.51
  -2   5 -24   13.31   23.30
   2  -4 -23   28.04   29.46
  -2   4  23   40.79   27.53
  -2   4  23   30.99   27.03
   2  -4 -22   -3.46   29.61
  -2   4  22   -2.22   33.00
  -2   4  22    7.69   29.44
   2  -4 -21   10.90   30.90
  -2   4  21   26.38   34.93
  -2   4  21    8.29   31.98
   2  -4 -21  -14.17   23.23
   2  -4 -20  -11.27   28.34
  -2   4  20   10.58   39.43
  -2   4  20   -3.32   33.02
   2  -4 -20   -1.10   23.54
   2  -4 -19  177.05   28.48
  -2   4  19  240.68   43.76
  -2   4  19  187.08   35.73
   2  -4 -19  127.78   25.50
   2  -4 -18  281.11   28.80
  -2   4  18  324.63   45.25
  -2   4  18  381.42   42.91
   2  -4 -18  187.14   24.85
  -2   4  17  127.10   42.22
  -2   4  17   96.67   36.92
   2  -4 -17   84.77   27.31
  -2   4  16  -28.71   42.10
  -2   4  16   10.69   36.94
   2  -4 -16   34.98   24.81
  -2   4  15   11.74   41.46
  -2   4  15   29.35   37.10
   2  -4 -15    8.70   27.21
  -2   4  14   59.69   40.78
  -2   4  14  107.36   37.65
   2  -4 -14   59.30   24.79
  -2   4  13   17.82   38.52
   2  -4 -13  -17.06   24.88
   2  -4 -13   74.10   24.79
  -2   4  12  -17.04   24.20
  -2   4  12   63.84   41.30
   2  -4 -12   20.39   24.64
  -2   4  12   67.19   34.10
   2  -4 -12   39.24   23.91
  -2   4  11   54.52   25.51
   2  -4 -11   56.41   23.04
  -2   4  11   81.51   34.46
   2  -4 -11   33.15   22.99
  -2   4  11    8.67   35.55
  -2   4  11  125.30   32.10
   2  -4 -11   65.89   23.07
  -2   4  10  258.28   30.03
   2  -4 -10  226.02   22.99
  -2   4  10  238.53   32.63
   2  -4 -10  207.37   34.61
  -2   4  10  172.49   36.77
   2  -4 -10  297.34   32.07
  -2   4  10  273.69   32.01
  -2   4  10  257.28   25.38
  -2   4   9   40.83   27.74
   2  -4  -9   -0.46   21.42
   2  -4  -9   15.42   24.00
  -2   4   9  -16.33   35.69
   2  -4  -9   17.79   29.13
  -2   4   9   34.12   30.54
  -2   4   9   22.06   20.58
  -2   4   8  136.96   32.17
   2  -4  -8  126.84   20.96
  -2   4   8  124.11   36.10
   2  -4  -8  152.93   26.79
   2  -4  -8  132.42   42.88
  -2   4   7  395.13   37.14
   2  -4  -7  341.32   22.58
   2  -4  -7  403.91   30.95
   2  -4  -7  370.28   51.03
  -2   4   6  484.44   42.00
   2  -4  -6  364.35   25.66
   2  -4  -6  561.69   46.29
   2  -4  -6  475.63   32.77
   2  -4  -6  567.03   56.44
  -2   4   5 2059.72  121.33
   2  -4  -5 2515.30  134.63
   2  -4  -5 1830.22  106.49
   2  -4  -5 1699.39  108.83
   2  -4  -5 2161.89  134.76
  -2   4   4  767.59   71.88
  -2   4  -2  895.24   97.85
  -2   4  -3  241.76   56.91
  -2   4  -3  236.71   56.55
  -2   4  -4  286.41   46.59
  -2   4  -4  428.53   58.51
  -2   4  -5 1529.10  102.29
  -2   4  -5 1824.65  103.00
  -2   4  -6  163.67   44.43
  -2   4  -6  199.58   41.21
   2  -4   7  248.47   38.93
  -2   4  -7  359.65   42.44
   2  -4   7  312.57   31.96
   2  -4   7  255.48   27.72
   2  -4   7  222.31   31.48
  -2   4  -7  295.14   33.85
   2  -4   8  657.16   54.72
   2  -4   8  669.10   47.23
   2  -4   8  536.70   34.30
  -2   4  -8  678.65   53.63
   2  -4   9   19.94   29.42
   2  -4   9   13.80   24.80
   2  -4   9   30.69   23.26
  -2   4  -9   28.87   21.47
  -2   4  -9   45.10   23.41
   2  -4  10   82.68   32.86
   2  -4  10   76.91   27.58
  -2   4 -10   45.60   26.07
   2  -4  10   52.62   23.53
  -2   4 -10   71.02   21.94
  -2   4 -10   52.32   21.25
   2  -4  11  122.31   33.90
   2  -4  11  147.46   27.04
  -2   4 -11   88.92   24.95
   2  -4  11   96.32   24.26
  -2   4 -11  140.31   22.42
  -2   4 -11  123.38   21.92
   2  -4  12  504.14   39.95
   2  -4  12  553.51   41.40
  -2   4 -12  507.00   40.96
   2  -4  12  561.64   35.50
  -2   4 -12  596.16   34.72
  -2   4 -12  531.33   32.73
   2  -4  13  167.18   36.63
   2  -4  13  142.35   22.73
  -2   4 -13  122.05   26.47
   2  -4  13  145.06   24.85
  -2   4 -13  155.26   24.31
  -2   4 -13  166.30   19.88
   2  -4  14   97.24   35.80
   2  -4  14   63.84   20.99
  -2   4 -14   49.25   26.57
   2  -4  14   66.13   24.00
  -2   4 -14  104.20   24.53
  -2   4 -14   65.49   17.80
   2  -4  15    5.23   38.07
  -2   4 -15   -8.54   26.46
   2  -4  15  -14.17   24.06
  -2   4 -15  -11.80   25.54
   2  -4  16   -3.42   39.51
  -2   4 -16  -19.59   29.32
  -2   4 -16  -19.16   26.37
   2  -4  16   -8.22   24.05
  -2   4 -16  -34.25   25.37
   2  -4  17   -8.52   41.57
  -2   4 -17  -11.45   27.84
   2  -4  17    3.13   24.12
  -2   4 -17   11.74   26.46
   2  -4  18   -9.81   42.22
  -2   4 -18    1.62   29.83
   2  -4  18   20.49   25.59
  -2   4 -18   -4.23   26.72
   2  -4  19   86.16   45.59
  -2   4 -19   18.85   29.39
  -2   4 -19   98.30   25.22
   2  -4  19   65.00   25.58
  -2   4 -19  101.82   26.50
   2  -4  20   20.11   43.85
  -2   4 -20    9.77   24.39
   2  -4  20   20.39   30.44
   2  -4  20   22.78   25.07
  -2   4 -20   19.59   25.84
   2  -4  21    6.41   41.67
  -2   4 -21   59.71   24.71
   2  -4  21   43.02   30.07
   2  -4  21   25.78   25.01
  -2   4 -21   50.00   26.98
   2  -4  22   -7.23   36.73
  -2   4 -22   26.64   25.19
   2  -4  22   -1.68   31.09
   2  -4  22   -2.71   26.02
  -2   4 -22  -15.62   26.40
  -2   4 -23   -0.41   20.02
  -2   4 -23   24.67   25.35
   2  -4  23   -2.92   29.88
   2  -4  23   34.58   28.27
  -2   4 -23   13.08   24.78
  -2   4 -24   32.27   17.60
  -2   4 -24   37.27   23.80
   2  -4  24   81.09   31.70
   2  -4  24   15.52   27.91
  -2   4 -24    7.81   23.28
  -2   4 -25   34.19   22.96
   2  -4  25   21.04   27.86
   2  -4  25   34.81   33.00
  -2   4 -25   24.55   22.96
   2  -3 -24   34.94   28.76
  -2   3  24   41.74   25.34
  -2   3  24   62.59   26.43
   2  -3 -23   13.29   31.38
  -2   3  23   -4.63   28.32
  -2   3  23   17.91   29.39
   2  -3 -23    9.46   23.04
   2  -3 -22    9.04   29.31
  -2   3  22  -25.01   33.19
  -2   3  22  -23.57   32.81
   2  -3 -22    7.18   25.48
   2  -3 -21  -15.48   30.67
  -2   3  21  -12.05   35.77
   2  -3 -21    5.25   25.10
  -2   3  21    3.89   33.26
   2  -3 -21   35.90   23.78
   2  -3 -20   -9.11   28.37
  -2   3  20   25.60   36.38
  -2   3  20    8.48   32.67
   2  -3 -20   33.98   25.34
   2  -3 -19  111.87   28.03
  -2   3  19  208.75   40.95
  -2   3  19  115.67   33.93
   2  -3 -19  126.57   26.08
   2  -3 -18  132.47   28.47
  -2   3  18  164.67   42.86
  -2   3  18  161.56   36.57
   2  -3 -18  134.28   26.83
   2  -3 -17   66.75   28.40
  -2   3  17  116.99   40.05
  -2   3  17   76.69   37.19
   2  -3 -17   84.78   27.33
   2  -3 -16   -8.41   27.36
  -2   3  16   21.12   43.44
  -2   3  16   53.88   36.64
   2  -3 -16   37.80   24.78
   2  -3 -15   58.02   26.91
  -2   3  15   31.79   39.56
  -2   3  15   59.98   37.23
   2  -3 -15   44.47   27.19
   2  -3 -14    1.26   25.51
  -2   3  14    6.40   37.69
  -2   3  14   31.00   35.55
   2  -3 -14   19.48   24.29
  -2   3  13   26.62   24.36
   2  -3 -13   30.06   21.32
  -2   3  13   29.97   33.55
  -2   3  13   42.63   34.09
   2  -3 -13   50.22   25.42
  -2   3  12   44.85   25.20
   2  -3 -12   48.77   22.54
  -2   3  12   50.10   34.53
  -2   3  12   66.59   36.92
  -2   3  12   62.24   31.51
   2  -3 -12   80.53   25.23
  -2   3  11   11.02   21.16
  -2   3  11   -3.74   26.15
  -2   3  11  -17.52   32.69
  -2   3  11  -10.89   33.71
  -2   3  11  -46.00   31.93
  -2   3  10   -3.85   21.25
  -2   3  10  -12.47   26.93
  -2   3  10   -6.35   30.06
  -2   3  10   -4.89   36.25
  -2   3  10    2.07   30.54
  -2   3  10  -16.06   24.71
  -2   3   9    2.91   28.54
  -2   3   9    9.90   36.60
   2  -3  -9  -35.59   26.30
  -2   3   9    0.55   26.01
  -2   3   9   -6.55   22.94
  -2   3   8  111.88   32.32
  -2   3   8  143.09   43.13
   2  -3  -8  147.74   32.02
  -2   3   8   95.24   30.39
  -2   3   7 5368.81  237.19
   2  -3  -7 4381.34  174.04
  -2   3   7 4936.69  229.97
   2  -3  -7 5187.85  211.27
   2  -3  -7 5088.50  228.45
   2  -3  -3  639.78   55.89
   2  -3  -2  147.85   34.33
  -2   3   0   12.58   47.94
  -2   3  -1 2081.12  112.47
  -2   3  -1 1848.99  127.77
  -2   3  -2 1578.10   87.20
  -2   3  -2 1601.49   97.90
  -2   3  -2 1717.14  115.56
  -2   3  -3  -21.53   35.35
  -2   3  -3   56.06   50.72
  -2   3  -3  -28.15   44.40
  -2   3  -4  -11.36   34.51
  -2   3  -4   72.54   49.80
  -2   3  -4    7.23   39.54
  -2   3  -5  176.04   40.16
  -2   3  -5  194.51   53.13
  -2   3  -5   77.66   34.94
  -2   3  -5  120.52   39.03
   2  -3   6  453.73   41.48
  -2   3  -6  474.39   35.16
  -2   3  -6  435.04   44.36
   2  -3   7 2476.22  122.62
  -2   3  -7 2579.09  141.56
   2  -3   8   96.80   36.06
  -2   3  -8  293.10   34.66
   2  -3   9 1362.98   73.26
   2  -3   9 1681.22   88.26
  -2   3  -9 1516.68   75.15
   2  -3  10  804.92   58.54
   2  -3  10 1032.35   69.10
   2  -3  10  831.00   55.12
  -2   3 -10 1027.90   62.30
  -2   3 -10  907.77   63.32
   2  -3  11 1723.78   82.34
   2  -3  11 2143.24  101.10
  -2   3 -11 1600.78   78.49
   2  -3  11 1797.97   73.28
  -2   3 -11 2196.78   83.56
  -2   3 -11 1945.23   79.71
   2  -3  12   93.26   31.25
   2  -3  12  128.22   24.08
  -2   3 -12   98.65   24.84
   2  -3  12  106.72   21.06
  -2   3 -12  172.46   24.70
  -2   3 -12  128.21   20.57
   2  -3  13   -7.09   31.42
   2  -3  13   13.32   21.51
  -2   3 -13   25.21   27.26
   2  -3  13   34.04   21.41
  -2   3 -13   43.26   22.11
  -2   3 -13   31.89   19.70
   2  -3  14  230.56   35.23
   2  -3  14  245.46   24.20
  -2   3 -14  279.98   31.59
   2  -3  14  321.15   27.68
  -2   3 -14  318.41   27.51
  -2   3 -14  278.06   21.11
   2  -3  15   89.24   36.69
   2  -3  15   40.37   19.06
  -2   3 -15   48.89   25.70
   2  -3  15   81.68   23.75
  -2   3 -15  113.28   25.67
  -2   3 -15   45.97   19.52
   2  -3  16  -20.39   38.03
  -2   3 -16   -9.20   28.60
   2  -3  16   -5.94   23.85
  -2   3 -16  -19.34   25.49
   2  -3  17    8.74   41.77
  -2   3 -17   24.14   29.02
   2  -3  17   22.98   21.91
  -2   3 -17   50.64   26.54
   2  -3  18  -11.28   42.66
  -2   3 -18   18.25   29.46
   2  -3  18   -5.60   22.42
  -2   3 -18   19.95   27.50
   2  -3  19   71.96   45.11
  -2   3 -19    5.36   29.72
   2  -3  19   24.79   23.94
  -2   3 -19   44.58   27.65
   2  -3  20   -9.78   45.06
  -2   3 -20   -8.97   29.18
  -2   3 -20    0.47   27.14
   2  -3  20  -11.48   23.53
  -2   3 -20   -5.33   27.99
   2  -3  21    1.08   42.28
  -2   3 -21  -40.59   29.55
  -2   3 -21    2.77   26.61
   2  -3  21  -18.07   23.70
  -2   3 -21  -11.12   26.97
   2  -3  22    3.85   36.26
  -2   3 -22   37.94   28.74
  -2   3 -22   42.93   27.45
   2  -3  22   37.26   24.70
  -2   3 -22   16.97   25.79
  -2   3 -23    1.69   18.60
  -2   3 -23   31.96   26.60
   2  -3  23   21.23   24.53
  -2   3 -23   31.02   27.71
  -2   3 -24   25.13   24.31
   2  -3  24   27.28   27.56
  -2   3 -24   14.61   24.75
  -2   3 -25   25.24   24.99
  -2   3 -25   29.56   22.73
  -2   3 -26    8.83   23.09
  -2   3 -26   25.43   23.02
   2  -2 -24   -6.00   27.51
  -2   2  24    8.11   25.48
   2  -2 -24   26.40   24.87
  -2   2  24   30.73   27.91
   2  -2 -24   25.15   25.03
   2  -2 -23   20.38   30.33
  -2   2  23    4.97   29.42
   2  -2 -23   13.19   25.66
  -2   2  23    6.81   29.57
   2  -2 -23   24.71   25.94
   2  -2 -22    1.73   30.96
  -2   2  22   18.81   33.05
   2  -2 -22   -9.77   26.45
  -2   2  22   19.09   36.45
   2  -2 -22   23.33   26.50
   2  -2 -21    0.93   30.54
  -2   2  21   13.16   34.73
  -2   2  21   16.83   34.89
   2  -2 -21   37.90   24.11
   2  -2 -20   34.03   30.74
  -2   2  20   81.60   36.95
  -2   2  20   45.35   33.56
   2  -2 -20   36.05   24.33
   2  -2 -19    6.08   30.64
  -2   2  19  -15.97   36.12
  -2   2  19   21.46   34.11
   2  -2 -19    3.73   25.27
   2  -2 -18   61.58   28.29
  -2   2  18   67.26   38.38
  -2   2  18   57.79   40.62
   2  -2 -18   41.43   26.35
  -2   2  17    4.72   27.69
   2  -2 -17   29.41   27.66
  -2   2  17   38.46   38.17
  -2   2  17   62.02   35.24
   2  -2 -17   67.43   26.82
  -2   2  16  -12.22   30.72
   2  -2 -16    1.54   26.42
  -2   2  16    4.57   38.04
  -2   2  16    9.31   35.34
   2  -2 -16   39.50   26.71
  -2   2  15   71.68   31.93
   2  -2 -15  115.09   26.33
  -2   2  15  114.56   37.92
  -2   2  15   88.61   34.42
   2  -2 -15   85.31   27.45
  -2   2  14   -9.34   31.30
  -2   2  14  -13.81   22.42
   2  -2 -14   22.33   24.82
  -2   2  14   13.73   35.75
  -2   2  14   50.34   33.26
   2  -2 -14   75.66   25.64
  -2   2  13   38.07   28.63
  -2   2  13   80.45   24.37
   2  -2 -13   67.39   23.35
  -2   2  13   55.10   34.99
  -2   2  13   95.71   32.05
   2  -2 -13   82.47   24.89
  -2   2  12   89.29   28.53
  -2   2  12   87.36   25.56
   2  -2 -12  120.65   22.77
  -2   2  12  208.37   36.89
  -2   2  12   93.06   36.67
  -2   2  12  157.08   30.64
  -2   2  11  -13.19   23.71
  -2   2  11    0.15   28.14
   2  -2 -11   -6.31   20.58
  -2   2  11    4.30   33.35
  -2   2  11  -11.55   31.38
  -2   2  11   26.79   27.79
  -2   2  11  -23.08   30.52
  -2   2  10    8.61   22.03
  -2   2  10   -6.79   29.65
   2  -2 -10  -13.85   19.63
  -2   2  10    5.30   32.09
  -2   2  10  -16.78   35.90
  -2   2  10   -5.89   26.40
  -2   2  10  -12.03   28.66
  -2   2   9  973.74   71.37
   2  -2  -9  874.84   54.20
  -2   2   9  993.83   87.30
  -2   2   9 1044.22   72.23
  -2   2   9 1208.12   78.35
  -2   2   8 6457.93  233.68
  -2   2   8 6837.54  150.35
  -2   2   7 1668.66  109.02
  -2   2   6  330.77   52.88
  -2   2   2   68.68   49.82
   2  -2  -2  -39.21   40.29
   2  -2  -2 -113.47   41.82
  -2   2   1  333.88   54.41
   2  -2  -1  219.04   52.05
   2  -2  -1  310.45   46.01
  -2   2   0  664.49   68.64
   2  -2   0  530.53   52.27
   2  -2   0  579.06   63.62
  -2   2  -1  867.56   79.53
   2  -2   1  768.17   75.33
  -2   2  -1  698.61   68.12
   2  -2   1  752.28   59.42
  -2   2  -2 5268.12  221.79
  -2   2  -2 5180.86  249.19
  -2   2  -2 5312.69  224.44
   2  -2   2 5105.60  204.73
  -2   2  -3  346.78   46.24
  -2   2  -3  385.19   62.40
  -2   2  -3  360.07   50.53
  -2   2  -4  -46.65   40.92
  -2   2  -4   23.68   56.19
  -2   2  -4 -138.11   44.80
   2  -2   5 1618.72   85.85
  -2   2  -5 1521.75   75.81
  -2   2  -5 1445.60   73.23
  -2   2  -5 1471.81   95.22
   2  -2   6  -44.56   41.12
  -2   2  -6  -29.79   30.85
  -2   2  -6  -85.72   41.93
  -2   2  -6  -24.62   37.64
   2  -2   7 2037.88  109.09
  -2   2  -7 1958.16  108.33
  -2   2  -7 1521.65   85.86
  -2   2  -7 1787.41  112.02
   2  -2   8 4027.35  173.11
  -2   2  -8 3713.66  170.11
  -2   2  -8 3568.63  173.45
   2  -2   9  -82.63   35.11
   2  -2  10  770.22   68.17
  -2   2 -10  715.97   46.90
  -2   2 -10  623.98   51.56
   2  -2  11  278.67   31.71
   2  -2  11  428.88   39.81
  -2   2 -11  320.45   32.98
   2  -2  11  322.24   24.39
  -2   2 -11  375.96   24.29
  -2   2 -11  284.09   29.99
   2  -2  12 1043.53   69.27
   2  -2  12 1311.22   88.67
  -2   2 -12 1157.88   77.27
   2  -2  12 1305.67   75.52
  -2   2 -12 1421.04   61.16
  -2   2 -12 1337.95   46.52
   2  -2  13   10.66   30.49
   2  -2  13   42.32   23.88
  -2   2 -13   11.79   23.23
   2  -2  13   11.76   19.97
  -2   2 -13   17.79   21.78
  -2   2 -13   20.44   21.93
   2  -2  14   -9.12   30.49
   2  -2  14    6.77   20.10
  -2   2 -14    8.64   26.67
   2  -2  14   -1.36   20.35
  -2   2 -14   16.32   23.40
  -2   2 -14   28.20   21.32
   2  -2  15   19.29   35.72
   2  -2  15   44.42   20.72
  -2   2 -15   64.53   27.58
   2  -2  15   50.67   23.20
  -2   2 -15   67.31   24.37
  -2   2 -15   39.11   20.83
   2  -2  16  -24.97   35.71
   2  -2  16   -0.06   19.27
  -2   2 -16  -16.61   28.29
   2  -2  16   -9.37   21.53
  -2   2 -16  -53.03   27.45
  -2   2 -16   -4.87   19.76
   2  -2  17  -33.98   38.50
  -2   2 -17  -11.25   27.33
   2  -2  17   -5.61   23.01
   2  -2  18  -35.43   42.92
  -2   2 -18   10.20   27.48
   2  -2  18   11.30   23.22
   2  -2  19  -38.60   43.12
  -2   2 -19  -13.59   30.10
   2  -2  19  -13.14   22.19
   2  -2  20  -23.57   42.64
  -2   2 -20  -35.13   27.47
   2  -2  20  -22.33   23.87
   2  -2  21   24.41   40.80
  -2   2 -21   12.10   29.19
  -2   2 -21   40.25   27.69
   2  -2  21    1.29   24.12
   2  -2  22  532.12   45.83
  -2   2 -22  477.99   38.56
   2  -2  22  515.33   35.11
  -2   2 -23  277.34   30.91
  -2   2 -23  401.41   28.31
   2  -2  23  355.45   28.28
  -2   2 -24   68.00   28.96
  -2   2 -24  124.74   27.97
   2  -2  24  160.24   36.92
   2  -2  24   99.96   26.97
  -2   2 -25   11.26   24.13
   2  -2  25  -43.70   32.99
  -2   2 -26   85.38   24.45
   2  -2  26  121.32   33.01
   2  -1 -24  -22.15   26.44
  -2   1  24   -7.81   25.87
   2  -1 -24   12.10   25.43
  -2   1  24   12.28   28.55
   2  -1 -24    1.87   24.72
   2  -1 -23    2.44   27.82
  -2   1  23   -4.12   27.96
  -2   1  23   16.71   31.05
   2  -1 -23   37.95   24.77
   2  -1 -22   13.96   29.36
  -2   1  22   -5.39   31.15
  -2   1  22   -2.46   34.50
   2  -1 -22   14.76   25.69
   2  -1 -21  -15.93   29.56
  -2   1  21   16.99   32.61
  -2   1  21   18.67   35.42
   2  -1 -21   11.53   26.51
  -2   1  20  -14.17   26.10
   2  -1 -20   14.18   29.56
  -2   1  20   51.07   34.48
  -2   1  20   16.83   33.83
   2  -1 -20   49.12   27.92
  -2   1  19   16.85   26.78
   2  -1 -19   53.96   27.90
  -2   1  19   59.94   36.99
  -2   1  19   97.15   35.97
   2  -1 -19   87.19   26.59
  -2   1  18   69.05   29.59
   2  -1 -18  152.34   28.36
  -2   1  18  164.51   36.34
  -2   1  18  184.11   35.78
   2  -1 -18  178.24   27.34
  -2   1  17   65.40   33.08
   2  -1 -17   83.33   27.28
  -2   1  17  108.16   36.38
  -2   1  17   89.26   34.48
   2  -1 -17   85.30   27.27
  -2   1  16   10.54   32.74
   2  -1 -16   10.54   25.84
  -2   1  16   24.02   36.60
  -2   1  16   63.59   33.97
   2  -1 -16   22.90   27.22
  -2   1  15  206.55   34.66
   2  -1 -15  225.66   26.14
  -2   1  15  284.50   36.74
  -2   1  15  303.89   33.68
   2  -1 -15  308.82   30.31
  -2   1  14  -28.01   32.66
  -2   1  14   -2.70   21.98
   2  -1 -14  -13.79   25.26
  -2   1  14   15.80   33.69
  -2   1  14   17.70   27.58
   2  -1 -14   41.59   28.18
  -2   1  13  170.99   32.14
  -2   1  13  143.83   24.71
   2  -1 -13  164.53   23.15
  -2   1  13  199.38   43.29
   2  -1 -13  177.17   30.85
  -2   1  12  274.01   30.56
  -2   1  12  255.03   26.06
   2  -1 -12  289.97   24.06
  -2   1  12  311.96   33.12
  -2   1  12  216.83   33.47
  -2   1  12  318.71   29.67
  -2   1  11   -2.79   25.79
  -2   1  11   -1.54   28.19
   2  -1 -11   -5.05   21.02
  -2   1  11  -22.24   31.52
  -2   1  11   10.49   29.98
  -2   1  11   56.84   29.43
  -2   1  11    9.76   30.77
  -2   1  10  158.73   25.25
   2  -1 -10  134.71   20.14
  -2   1  10  148.65   30.34
  -2   1  10   92.49   39.38
  -2   1  10  189.24   30.65
  -2   1   9 4243.60  189.09
  -2   1   9 4494.74  194.23
  -2   1   815422.89  350.36
  -2   1   7  769.59   84.89
  -2   1   6   56.29   51.21
  -2   1   5  147.57   41.47
  -2   1   5   48.30   56.86
  -2   1   4   55.66   42.75
   2  -1  -4   35.08   33.57
  -2   1   4   -8.25   52.41
  -2   1   3 1614.19   84.17
   2  -1  -3 1439.80   75.91
  -2   1   2 4020.93  182.15
   2  -1  -2 3776.64  172.22
  -2   1   1 1961.21  114.72
   2  -1  -1 1604.92   99.52
   2  -1  -1 1788.03  117.52
   2  -1   0 -114.98   63.60
   2  -1   0   36.30   59.06
  -2   1  -1 5257.99  278.58
   2  -1   1 5174.40  249.36
  -2   1  -1 5651.66  178.38
   2  -1   1 5395.37  169.61
  -2   1  -2 1773.83  109.11
  -2   1  -2 2315.57  145.16
  -2   1  -2 1536.37   91.71
  -2   1  -2 2003.61  140.67
   2  -1   2 1775.90  124.09
  -2   1  -397563.88  558.95
  -2   1  -396828.21  963.21
  -2   1  -397401.31  422.10
  -2   1  -398440.11  533.91
   2  -1   395009.07  955.40
   2  -1   437042.21  389.87
  -2   1  -436190.91  376.16
  -2   1  -435658.51  398.60
  -2   1  -437075.79  475.92
   2  -1   554235.07  547.73
  -2   1  -554332.07  510.20
  -2   1  -552381.87  529.04
  -2   1  -553487.74  626.76
   2  -1   6 2303.05  124.85
  -2   1  -6 2298.53  113.96
  -2   1  -6 2218.27  124.62
  -2   1  -6 2316.20  145.66
  -2   1  -7   73.95   32.47
  -2   1  -7   21.79   47.65
  -2   1  -7   40.60   41.85
   2  -1   8 1521.93   87.34
  -2   1  -8 1471.52   80.88
  -2   1  -8 1469.28   86.50
   2  -1   9 2961.69  137.87
  -2   1  -9 2659.13  141.94
  -2   1  -9 2815.60  136.20
   2  -1  10 2754.95  131.55
  -2   1 -10 2284.76  122.46
  -2   1 -10 2583.00  133.69
   2  -1  11  -10.68   32.71
  -2   1 -11   -3.63   24.29
  -2   1 -11  -46.84   31.27
  -2   1 -11   61.10   31.95
   2  -1  12  972.72   83.06
   2  -1  12 1340.73   62.73
  -2   1 -12 1398.56   61.55
  -2   1 -12 1290.67   90.02
   2  -1  12 1199.94   70.64
  -2   1 -12 1328.19   78.88
   2  -1  13  181.64   30.90
   2  -1  13  225.98   24.90
  -2   1 -13  239.21   29.26
   2  -1  13  260.72   21.76
  -2   1 -13  240.12   25.81
   2  -1  14    7.87   28.59
   2  -1  14    6.35   21.68
  -2   1 -14   -3.07   24.59
   2  -1  14   -8.54   20.73
  -2   1 -14   -2.55   23.59
   2  -1  15   12.04   31.92
   2  -1  15   -4.45   20.46
  -2   1 -15   16.15   25.21
   2  -1  15   12.42   19.67
  -2   1 -15   23.98   23.51
  -2   1 -15   18.73   22.90
   2  -1  16  224.36   36.14
   2  -1  16  175.76   23.55
  -2   1 -16  270.87   31.23
   2  -1  16  253.97   25.26
  -2   1 -16  320.50   28.92
  -2   1 -16  223.83   22.54
   2  -1  17   68.39   37.23
   2  -1  17   62.82   17.94
  -2   1 -17   73.50   27.62
   2  -1  17   80.24   23.88
  -2   1 -17  109.23   26.92
   2  -1  18   -4.08   37.57
  -2   1 -18   15.65   29.61
   2  -1  18    2.67   24.32
  -2   1 -18   22.07   28.42
   2  -1  19   -9.14   37.53
  -2   1 -19   -6.33   27.96
   2  -1  19   -4.43   24.52
  -2   1 -19   68.91   28.70
   2  -1  20  -42.58   37.44
  -2   1 -20  -22.73   28.45
   2  -1  20  -33.30   24.31
  -2   1 -20   -8.67   29.85
  -2   1 -21   -6.07   27.50
   2  -1  21  -23.16   24.90
  -2   1 -21   -2.46   28.78
  -2   1 -22  -33.62   28.41
   2  -1  22  -24.24   23.78
  -2   1 -22    7.80   27.35
  -2   1 -23  321.15   30.27
   2  -1  23  261.18   26.57
  -2   1 -23  401.94   28.73
  -2   1 -24   91.67   26.09
  -2   1 -24  144.90   27.50
  -2   1 -25    0.53   26.97
   2  -1  25   -6.30   35.65
  -2   1 -25    6.51   23.37
  -2   1 -26   42.96   27.03
   2  -1  26  117.73   33.85
  -2   1 -26   77.50   22.83
   2   0 -25    7.66   25.28
  -2   0  25   -8.11   25.92
   2   0 -25   -3.65   24.55
  -2   0  24   -4.58   25.59
   2   0 -24  -12.15   25.95
  -2   0  24   24.09   28.90
   2   0 -24   18.12   24.88
   2   0 -23    0.54   23.78
  -2   0  23   15.20   26.59
  -2   0  23    5.76   30.25
   2   0 -23   10.41   25.86
   2   0 -22   30.59   25.96
  -2   0  22   34.68   29.77
  -2   0  22   77.11   34.49
   2   0 -22   36.25   25.27
  -2   0  21   18.47   27.94
   2   0 -21    2.72   27.83
  -2   0  21   17.32   30.27
  -2   0  21    8.91   34.92
   2   0 -21   25.29   27.29
  -2   0  20    0.44   27.91
   2   0 -20   -7.12   28.05
  -2   0  20    2.48   30.58
  -2   0  20   29.46   33.90
   2   0 -20   26.88   26.14
  -2   0  19   20.85   29.37
   2   0 -19   13.33   26.46
  -2   0  19   42.98   31.74
  -2   0  19   26.96   33.92
   2   0 -19   41.88   27.92
  -2   0  18  117.56   31.87
   2   0 -18  146.52   28.65
  -2   0  18  193.61   33.56
  -2   0  18  183.85   35.62
   2   0 -18  198.93   28.59
  -2   0  17  405.94   35.07
   2   0 -17  429.93   30.13
  -2   0  17  603.15   38.06
  -2   0  17  581.84   35.78
   2   0 -17  599.02   32.73
  -2   0  16   33.96   34.66
   2   0 -16   21.77   26.72
  -2   0  16   57.73   34.37
  -2   0  16   30.51   32.95
   2   0 -16   45.46   28.55
  -2   0  15  267.87   33.90
   2   0 -15  267.27   25.72
  -2   0  15  389.89   35.31
  -2   0  15  383.96   33.75
   2   0 -15  342.16   29.72
  -2   0  14   15.83   33.65
  -2   0  14    9.78   21.79
   2   0 -14    5.71   24.26
  -2   0  14  -22.13   32.30
  -2   0  14  -14.47   26.50
   2   0 -14  -31.98   27.51
  -2   0  13   19.74   29.43
  -2   0  13   -6.23   22.94
   2   0 -13  -11.98   20.59
  -2   0  13  -16.45   30.87
  -2   0  12  723.11   41.93
   2   0 -12  687.43   40.07
  -2   0  12  836.46   52.44
   2   0 -12  885.36   44.86
  -2   0  11  436.42   33.07
   2   0 -11  446.68   24.87
  -2   0  11  523.39   37.02
  -2   0  10  481.17   31.89
   2   0 -10  472.17   28.55
  -2   0  10  490.91   62.65
  -2   0   9  -45.17   30.68
  -2   0   8  515.11   62.14
  -2   0   7 1778.55   93.21
  -2   0   7 1511.35  100.97
  -2   0   6  436.69   40.59
   2   0  -6  396.38   31.90
  -2   0   6  404.81   46.91
  -2   0   5  -24.98   41.75
   2   0  -5  -12.00   32.43
  -2   0   5    2.81   47.54
  -2   0   4   14.25   45.54
   2   0  -4  -11.01   37.35
  -2   0   3  204.19   53.69
   2   0  -3   34.67   40.23
  -2   0   2 -387.78   50.79
   2   0  -2 -367.17   47.96
  -2   0   1 4933.19  201.94
   2   0  -1 4588.54  193.04
  -2   0   0 2566.63  130.69
   2   0   0 2144.34  109.60
   2   0   0 2378.83  130.93
  -2   0  -1  617.28   88.85
   2   0   1  204.27   72.00
   2   0   2 8622.97  125.43
  -2   0  -2 8258.54  121.84
   2   0   2 8720.41  232.92
  -2   0  -3   92.69   63.52
  -2   0  -3 -246.71   74.06
   2   0   3  118.54   82.72
  -2   0  -3  -57.02   73.91
   2   0   3 -190.35   58.75
   2   0   410766.43  260.85
  -2   0  -410894.65  178.53
   2   0   411260.95  183.89
  -2   0  -411435.49  183.59
   2   0   411079.80  263.31
   2   0   5 3300.67  161.20
  -2   0  -5 3319.75  140.78
   2   0   5 3908.93  210.33
  -2   0  -5 3528.33  159.49
   2   0   6 3765.73  172.70
  -2   0  -6 3774.68  163.53
   2   0   6 3485.01  154.43
  -2   0  -6 3937.26  177.36
   2   0   7  264.21   50.18
  -2   0  -7  273.38   45.23
  -2   0  -7  257.85   63.32
   2   0   8  744.46   56.74
  -2   0  -8  693.23   56.87
   2   0   9  182.80   42.25
  -2   0  -9  151.03   28.49
   2   0  10  -47.48   34.53
  -2   0 -10  -68.49   27.01
   2   0  11  152.46   32.16
  -2   0 -11   96.05   24.51
  -2   0 -11  157.49   24.89
  -2   0 -11  110.96   41.45
  -2   0 -11  145.95   23.22
   2   0  12  -42.45   24.12
  -2   0 -12   14.42   22.78
  -2   0 -12   -0.25   29.72
   2   0  12  -62.92   35.48
  -2   0 -12    4.25   20.03
   2   0  13   13.63   22.20
  -2   0 -13   32.91   22.92
  -2   0 -13   25.02   29.73
   2   0  13   38.35   34.64
   2   0  13   18.95   19.34
  -2   0 -13    9.84   20.31
   2   0  14   82.86   22.65
  -2   0 -14  103.87   26.34
  -2   0 -14  108.25   34.36
   2   0  14  131.15   32.36
   2   0  14   92.71   21.15
  -2   0 -14   82.51   21.76
   2   0  15   20.70   20.34
  -2   0 -15  -10.62   25.11
  -2   0 -15  -26.76   33.22
   2   0  15   -8.19   20.39
  -2   0 -15    8.75   23.58
   2   0  16   64.93   21.16
  -2   0 -16   72.25   26.50
  -2   0 -16   51.52   35.65
   2   0  16   64.32   23.78
  -2   0 -16  130.30   25.89
  -2   0 -16   57.74   20.91
  -2   0 -17  617.90   45.06
   2   0  17  582.84   43.20
  -2   0 -17  748.10   48.14
  -2   0 -18  379.44   30.08
   2   0  18  353.34   27.64
  -2   0 -18  434.81   30.84
  -2   0 -19   16.90   28.66
   2   0  19    4.43   25.68
  -2   0 -19   37.11   28.63
  -2   0 -20 1141.33   66.06
  -2   0 -20 1510.85   78.72
   2   0  20 1227.76   67.41
  -2   0 -20 1426.87   76.33
  -2   0 -21  836.80   55.77
  -2   0 -21  867.66   54.91
   2   0  21  730.32   54.43
  -2   0 -21  896.77   57.81
  -2   0 -22    0.51   26.62
  -2   0 -22    1.31   28.81
   2   0  22  -11.79   25.45
  -2   0 -22   26.36   26.17
  -2   0 -23  260.45   29.37
  -2   0 -23  373.15   31.76
  -2   0 -23  358.79   29.18
  -2   0 -24  192.45   30.10
  -2   0 -24  278.46   30.53
  -2   0 -24  186.73   24.35
  -2   0 -25   86.03   27.82
  -2   0 -25   83.01   26.35
  -2   0 -25   63.27   22.42
  -2   0 -26  -16.59   26.32
  -2   0 -26   -9.74   24.79
   2   0  26  -14.42   32.42
  -2   0 -26  -18.09   21.34
  -2  -1  24    6.97   25.45
  -2  -1  24   16.31   26.83
   2   1 -24   -8.46   25.17
  -2  -1  23   18.69   30.41
  -2  -1  23   21.46   26.58
  -2  -1  23  -10.64   30.21
  -2  -1  22   38.04   26.13
  -2  -1  22   40.62   30.28
  -2  -1  21  -30.72   31.87
  -2  -1  21   -9.40   28.83
  -2  -1  21  -21.36   31.80
  -2  -1  20    1.91   31.22
   2   1 -20   19.11   25.03
  -2  -1  20   17.89   28.45
  -2  -1  20   38.19   35.77
  -2  -1  19   96.38   33.07
   2   1 -19   95.88   27.47
  -2  -1  19  159.83   30.33
  -2  -1  19  158.54   33.81
  -2  -1  18   -9.61   33.70
   2   1 -18   -6.76   25.80
  -2  -1  18    6.34   31.13
  -2  -1  18    5.92   30.63
  -2  -1  17   94.47   32.62
   2   1 -17  133.38   26.82
  -2  -1  17  192.41   32.92
  -2  -1  17  271.91   37.39
  -2  -1  16  -19.01   35.08
   2   1 -16  -21.16   25.08
  -2  -1  16   -6.23   32.09
  -2  -1  15  165.97   33.65
   2   1 -15  165.06   25.54
  -2  -1  15  272.86   32.25
  -2  -1  14  791.15   38.87
   2   1 -14  618.55   40.34
  -2  -1  14  789.42   43.05
  -2  -1  13  190.90   30.91
   2   1 -13  157.93   22.57
  -2  -1  13  210.84   30.21
  -2  -1  12   16.21   28.68
   2   1 -12   -1.71   20.63
  -2  -1  12   37.84   29.56
  -2  -1  11  304.96   30.97
   2   1 -11  240.96   25.37
  -2  -1  11  395.01   30.70
   2   1 -11  398.45   28.90
  -2  -1  10  780.93   51.75
  -2  -1  10  719.49   56.73
  -2  -1  10  844.94   60.52
  -2  -1  10  813.99   58.64
  -2  -1  10 1052.02   68.08
  -2  -1   9  155.42   28.17
  -2  -1   9   68.90   33.75
  -2  -1   9  133.80   27.81
  -2  -1   9  143.91   26.37
  -2  -1   9  139.78   47.44
  -2  -1   8  126.71   49.74
   2   1  -7   15.80   37.87
  -2  -1   6  447.35   39.21
   2   1  -6  400.98   30.06
   2   1  -6  379.75   46.41
  -2  -1   5    0.80   37.34
   2   1  -5  -14.84   30.73
   2   1  -5  -84.73   50.77
  -2  -1   4  129.45   44.03
   2   1  -4  125.17   35.97
  -2  -1   3 2921.97  119.17
   2   1  -3 2705.25  125.40
   2   1  -3 2626.20  190.00
  -2  -1   2 -193.16   52.13
   2   1  -2 -184.78   43.02
   2   1  -2 -220.84  108.06
  -2  -1   1 2720.60  127.94
   2   1  -1 2509.83  116.07
  -2  -1   0 1929.74  148.53
   2   1   0 1203.27   92.84
  -2  -1  -178077.34  601.10
   2   1   179342.10  686.60
   2   1   178304.53  618.34
   2   1   214935.50  177.21
  -2  -1  -216428.13  311.97
   2   1   349473.86  511.35
  -2  -1  -350805.45  634.84
   2   1   4 -243.25   62.44
   2   1   4   13.33   80.86
  -2  -1  -4  180.27   62.75
   2   1   5 1844.03  129.39
  -2  -1  -5 1877.84   90.13
   2   1   5 2229.36  123.14
  -2  -1  -5 2216.07  132.03
   2   1   5 2032.89  144.65
   2   1   6 4220.55  184.26
  -2  -1  -6 3699.34  166.74
   2   1   6 4531.73  205.94
  -2  -1  -6 4214.82  208.94
   2   1   7  171.20   40.46
  -2  -1  -7  189.32   38.02
  -2  -1  -7  187.81   46.14
   2   1   8  121.81   34.14
  -2  -1  -8  102.15   30.82
  -2  -1  -8  181.86   44.58
   2   1   9  -13.74   33.15
  -2  -1  -9   80.21   28.29
  -2  -1  -9  -88.65   39.45
   2   1  10   68.06   32.17
  -2  -1 -10  117.33   28.15
   2   1  11  323.18   29.84
  -2  -1 -11  307.85   32.35
  -2  -1 -11  396.36   37.14
   2   1  11  211.03   53.46
   2   1  12   18.04   23.95
  -2  -1 -12   10.61   27.96
  -2  -1 -12   -3.78   20.58
  -2  -1 -12  -16.18   28.37
   2   1  13  -12.54   22.07
  -2  -1 -13   -8.53   30.13
   2   1  13   21.64   37.52
  -2  -1 -13   16.06   21.42
  -2  -1 -13  -16.96   28.89
   2   1  14  744.97   49.60
  -2  -1 -14  906.48   62.18
   2   1  14  659.08   62.75
   2   1  14  631.82   38.73
  -2  -1 -14  832.91   43.78
  -2  -1 -14  925.29   52.86
   2   1  15  126.39   22.17
  -2  -1 -15  168.61   26.77
  -2  -1 -15   81.18   41.33
   2   1  15  116.21   30.41
   2   1  15  126.02   22.18
  -2  -1 -15  142.99   23.67
  -2  -1 -15  163.56   25.77
  -2  -1 -16  331.45   30.86
  -2  -1 -16  251.57   48.32
   2   1  16  136.84   50.05
   2   1  16  266.30   30.27
  -2  -1 -16  322.51   28.61
  -2  -1 -16  236.03   27.95
  -2  -1 -17   -5.02   28.76
  -2  -1 -17  -13.57   43.28
   2   1  17    1.78   25.23
  -2  -1 -17   10.79   25.98
  -2  -1 -18    0.10   29.88
   2   1  18  -25.92   26.92
  -2  -1 -18  -12.32   27.47
  -2  -1 -19   29.81   29.85
  -2  -1 -19   20.24   31.68
  -2  -1 -19    5.07   37.05
   2   1  19    4.12   28.75
  -2  -1 -19   39.15   28.25
  -2  -1 -20    6.67   29.95
  -2  -1 -20    2.12   31.31
   2   1  20    5.59   27.45
  -2  -1 -20   43.58   29.99
  -2  -1 -21  515.24   40.10
  -2  -1 -21  659.52   46.95
  -2  -1 -21  551.12   40.88
  -2  -1 -22  350.09   31.73
  -2  -1 -22  398.87   33.59
  -2  -1 -22  389.54   31.72
  -2  -1 -23   95.56   26.17
  -2  -1 -23  121.28   30.11
  -2  -1 -23  106.62   26.37
  -2  -1 -24   -0.08   26.53
  -2  -1 -24   39.07   28.28
  -2  -1 -24   25.26   23.18
  -2  -1 -25   16.11   24.88
  -2  -1 -25   -8.14   25.92
  -2  -1 -25    1.23   22.95
  -2  -1 -26   23.44   26.40
  -2  -1 -26   61.05   25.77
   2   1  26   61.10   31.11
  -2  -1 -26   56.52   21.14
  -2  -2  24  -54.42   35.36
  -2  -2  24    0.46   27.58
  -2  -2  24   37.89   26.44
   2   2 -24   17.85   28.42
  -2  -2  23  -10.65   34.45
  -2  -2  23    7.77   26.24
  -2  -2  23   34.53   27.10
   2   2 -23   44.23   27.02
  -2  -2  22  -27.91   34.74
  -2  -2  22   19.08   27.44
  -2  -2  22   30.32   30.08
   2   2 -22   68.07   28.96
  -2  -2  21    8.75   36.57
  -2  -2  21   26.49   30.02
  -2  -2  21   41.97   32.94
   2   2 -21   68.98   29.57
  -2  -2  20  142.41   34.69
  -2  -2  20  203.74   27.74
  -2  -2  20  255.00   33.82
   2   2 -20  261.48   30.54
  -2  -2  19  -15.18   31.79
  -2  -2  19  -34.60   28.08
  -2  -2  19   -7.86   32.56
   2   2 -19  -33.20   29.27
  -2  -2  18  -32.09   32.03
  -2  -2  18   -1.75   29.60
   2   2 -18  -36.91   29.60
  -2  -2  17  194.62   33.44
  -2  -2  17  260.62   31.49
   2   2 -17  309.87   31.07
  -2  -2  16   -7.22   31.31
  -2  -2  16   61.45   30.12
   2   2 -16   20.66   26.29
  -2  -2  15   -2.18   30.95
  -2  -2  15   22.50   29.17
   2   2 -15   14.26   28.41
  -2  -2  14  265.07   35.89
  -2  -2  14  296.06   31.17
   2   2 -14  333.38   31.59
  -2  -2  13  262.31   30.97
  -2  -2  13  215.93   23.81
  -2  -2  13  301.03   28.97
   2   2 -13  351.51   30.87
  -2  -2  12  -20.14   30.04
  -2  -2  12   35.20   23.19
  -2  -2  12   21.43   26.58
  -2  -2  12   35.35   26.02
  -2  -2  12   40.84   26.25
   2   2 -12   38.53   29.69
  -2  -2  11    0.76   26.50
  -2  -2  11   17.68   24.45
  -2  -2  11   32.37   25.72
  -2  -2  11    7.82   24.57
  -2  -2  11   44.12   26.96
   2   2 -11   15.08   26.54
  -2  -2  10   32.11   25.74
  -2  -2  10   20.10   25.77
  -2  -2  10   39.77   25.17
  -2  -2  10   35.37   24.64
  -2  -2  10   35.77   23.80
   2   2 -10   38.48   25.43
  -2  -2   9  145.01   28.78
  -2  -2   9  119.71   30.93
  -2  -2   9  168.12   26.64
  -2  -2   9  322.14   44.91
  -2  -2   8  107.37   34.78
   2   2  -8   80.22   63.68
  -2  -2   7  192.34   42.59
   2   2  -7  117.70   56.66
  -2  -2   6  219.76   45.83
   2   2  -6  234.12   38.89
   2   2  -6  132.56   40.66
  -2  -2   5   90.20   37.61
   2   2  -5   44.34   28.19
   2   2  -5   78.20   44.03
  -2  -2   4  108.15   39.66
   2   2  -4   56.47   31.47
   2   2  -4  -12.14   48.46
  -2  -2   3  327.35   41.82
   2   2  -3  210.62   44.06
  -2  -2   2  -68.99   45.77
   2   2  -2  -37.70   37.54
  -2  -2   1 3908.66  153.78
   2   2  -1 3806.94  155.28
   2   2  -1 4010.90  207.34
  -2  -2   033185.73  358.84
   2   2   033562.73  270.98
   2   2   033414.54  476.40
   2   2   1  500.26  155.22
   2   2   1  907.48   82.15
   2   2   245638.68  410.19
  -2  -2  -246449.67  550.93
   2   2   244864.02  605.14
   2   2   3 3448.42  218.77
   2   2   3 3089.83  179.38
  -2  -2  -3 4019.95  190.71
   2   2   3 3641.09  191.62
   2   2   4 1951.41  128.87
   2   2   4 1984.54  107.38
  -2  -2  -4 2342.64  163.37
   2   2   4 2145.08  139.15
   2   2   5 3140.41  130.49
   2   2   5 3180.62  142.88
  -2  -2  -5 3092.79  182.48
   2   2   5 3496.42  178.78
   2   2   6  205.16   41.35
  -2  -2  -6  223.82   43.59
   2   2   6  306.83   62.59
  -2  -2  -6  217.37   49.93
   2   2   7  306.14   33.44
  -2  -2  -7  262.40   43.32
  -2  -2  -7  327.91   38.78
   2   2   8  -39.19   29.60
  -2  -2  -8   -9.07   27.29
  -2  -2  -8    6.16   35.59
   2   2   9 1114.79   53.75
  -2  -2  -9 1280.86   76.78
   2   2  10  159.59   30.09
  -2  -2 -10  100.28   24.12
  -2  -2 -10  232.49   43.17
   2   2  11  152.98   27.48
  -2  -2 -11  199.27   24.35
   2   2  11  339.52   67.60
  -2  -2 -11  256.14   31.87
   2   2  12   50.91   23.44
  -2  -2 -12   76.03   21.56
  -2  -2 -12   76.58   25.35
   2   2  12   21.22   32.09
  -2  -2 -12   73.00   19.98
  -2  -2 -12   66.79   28.23
   2   2  13  200.75   25.24
  -2  -2 -13  239.05   25.92
  -2  -2 -13  248.18   29.71
   2   2  13  231.22   38.62
  -2  -2 -13  217.74   22.43
  -2  -2 -13  201.10   27.35
   2   2  14  512.27   41.90
  -2  -2 -14  555.62   34.97
  -2  -2 -14  590.80   46.29
   2   2  14  398.39   52.29
  -2  -2 -14  484.21   34.61
  -2  -2 -14  446.74   35.61
  -2  -2 -15 1050.04   71.77
   2   2  15  786.28   63.94
  -2  -2 -15  954.91   51.06
  -2  -2 -15  902.67   52.98
  -2  -2 -16  565.70   36.66
  -2  -2 -16  595.16   43.62
   2   2  16  377.41   44.01
  -2  -2 -16  498.84   31.84
  -2  -2 -16  401.80   31.75
  -2  -2 -17   73.76   31.53
  -2  -2 -17   24.58   36.79
  -2  -2 -17   92.79   28.13
  -2  -2 -18  197.87   31.95
  -2  -2 -18  198.31   40.05
  -2  -2 -18  215.32   29.73
  -2  -2 -19 1525.96   57.15
  -2  -2 -19 1476.91   68.07
  -2  -2 -19 1424.79   62.51
  -2  -2 -20    2.75   31.58
  -2  -2 -20   -6.85   38.72
  -2  -2 -20   56.76   28.35
  -2  -2 -21  810.03   51.17
  -2  -2 -21  800.11   58.99
  -2  -2 -21  720.29   53.47
  -2  -2 -22   53.43   27.35
  -2  -2 -22   69.25   31.13
  -2  -2 -22   25.32   25.70
  -2  -2 -23  -15.22   26.43
  -2  -2 -23   28.33   29.36
  -2  -2 -23   10.66   26.27
  -2  -2 -24   23.41   26.88
  -2  -2 -24    4.80   27.80
  -2  -2 -24   -5.92   23.12
  -2  -2 -25    9.93   24.59
  -2  -2 -25  -15.34   27.40
  -2  -2 -25   16.45   21.39
  -2  -2 -26   21.42   24.49
  -2  -2 -26   11.69   25.43
   2   2  26   -4.42   25.88
  -2  -2 -26   15.72   19.83
  -2  -3  24   -8.09   33.47
  -2  -3  24    9.33   27.35
   2   3 -24  -10.13   25.65
  -2  -3  23   -1.55   35.93
  -2  -3  23    3.78   25.38
  -2  -3  23   22.23   27.28
   2   3 -23  -19.23   25.80
  -2  -3  22  -16.18   38.07
  -2  -3  22   26.68   27.12
  -2  -3  22   23.79   25.61
   2   3 -22    0.46   27.54
  -2  -3  21  -29.85   36.76
  -2  -3  21   -2.67   26.52
  -2  -3  21    2.91   26.87
   2   3 -21   -0.85   29.13
  -2  -3  20   55.73   35.68
  -2  -3  20   41.59   28.87
   2   3 -20   59.25   29.32
  -2  -3  19   -6.22   31.70
  -2  -3  19   -6.01   29.59
   2   3 -19    0.57   28.55
  -2  -3  18  -10.91   32.94
  -2  -3  18   21.46   29.19
   2   3 -18   22.36   29.44
  -2  -3  17   40.30   32.14
  -2  -3  17   34.28   29.86
   2   3 -17   46.45   28.50
  -2  -3  16   93.97   33.37
  -2  -3  16  118.25   29.69
   2   3 -16   92.18   28.78
  -2  -3  15   22.12   30.24
  -2  -3  15   -8.75   29.08
  -2  -3  15  -41.18   22.73
  -2  -3  15  -22.26   31.90
   2   3 -15  -10.53   28.53
  -2  -3  14   -9.67   28.86
  -2  -3  14   12.63   28.16
  -2  -3  14   -4.27   23.05
  -2  -3  14   10.79   30.41
   2   3 -14    8.20   26.86
  -2  -3  13   67.61   28.41
  -2  -3  13   21.29   19.96
  -2  -3  13   51.88   27.48
  -2  -3  13   31.48   25.09
  -2  -3  13   79.80   30.66
   2   3 -13   44.73   28.68
  -2  -3  12   -4.36   22.68
  -2  -3  12    2.82   25.87
  -2  -3  12    6.15   28.12
   2   3 -12   13.78   25.26
  -2  -3  11  123.23   26.39
  -2  -3  11  132.14   26.23
  -2  -3  11  109.20   33.34
  -2  -3  11   97.58   27.20
  -2  -3  10   40.83   25.46
  -2  -3  10   57.96   24.92
  -2  -3  10    3.53   26.17
  -2  -3  10   11.45   25.09
   2   3 -10   45.87   24.09
  -2  -3   9   30.36   24.95
  -2  -3   9   -3.11   26.65
  -2  -3   9   22.93   24.75
  -2  -3   9   36.56   25.51
  -2  -3   9   21.92   26.01
   2   3  -9   13.20   29.29
  -2  -3   8 1099.95   65.06
  -2  -3   8 1206.27   79.63
  -2  -3   8 1235.81   79.88
  -2  -3   8 1252.00   73.76
  -2  -3   8 1224.74   80.09
  -2  -3   7  318.50   33.96
   2   3  -7  163.43   51.70
  -2  -3   6  306.80   40.69
   2   3  -6   94.55   45.02
  -2  -3   5  591.58   52.53
   2   3  -5  710.70   48.80
   2   3  -5  556.89   57.94
  -2  -3   4  -12.44   37.42
   2   3  -4    7.84   27.96
  -2  -3   3 2136.31  115.96
   2   3  -3 2294.65  106.61
  -2  -3   2 1158.83   72.30
   2   3  -2 1365.56   60.45
  -2  -3   1 1347.05   95.59
   2   3  -1 1525.17   66.84
   2   3  -1 1152.88   90.16
  -2  -3   0  878.87   78.62
   2   3   0 1028.90   51.51
   2   3   0  785.77   89.89
   2   3   1  282.32   35.19
   2   3   1  201.77   55.72
   2   3   1  135.65   41.60
   2   3   2 -161.97   31.88
   2   3   2 -103.80   44.50
   2   3   2  -70.91   30.57
   2   3   3 1147.66   85.20
   2   3   3 1136.70  102.91
  -2  -3  -3 1181.22   93.77
   2   3   3 1038.00   79.49
   2   3   4 2231.43  129.47
   2   3   4 2136.06  131.39
  -2  -3  -4 2056.98  128.99
   2   3   4 2001.66  128.30
   2   3   5 2856.28  134.07
  -2  -3  -5 2767.80  116.36
   2   3   5 2898.33  153.60
   2   3   6  148.27   33.56
  -2  -3  -6  130.70   36.01
   2   3   6  120.63   48.95
  -2  -3  -6  118.31   40.74
   2   3   7  -47.95   32.22
  -2  -3  -7   -3.58   32.46
   2   3   7  -98.60   52.51
  -2  -3  -7  -84.37   36.41
   2   3   8  -10.13   33.07
  -2  -3  -8   50.97   30.58
  -2  -3  -8   96.70   32.99
   2   3   9  103.96   30.63
  -2  -3  -9   83.37   25.89
  -2  -3  -9  173.31   38.26
   2   3  10   74.25   27.87
  -2  -3 -10  112.97   20.54
  -2  -3 -10  163.36   30.01
   2   3  11   19.54   24.92
  -2  -3 -11    5.63   21.50
  -2  -3 -11   36.40   21.13
  -2  -3 -11   14.38   25.23
   2   3  12 2022.36   95.56
  -2  -3 -12 1832.02   74.28
  -2  -3 -12 1616.34   79.42
  -2  -3 -12 1763.45   87.58
   2   3  12 1898.09  130.09
  -2  -3 -12 1432.04   84.01
  -2  -3 -12 1665.46   84.70
   2   3  13    5.55   22.84
  -2  -3 -13   -9.04   23.06
  -2  -3 -13  -18.06   22.66
  -2  -3 -13  -10.67   24.81
   2   3  13  -48.38   36.26
  -2  -3 -13   -8.25   19.43
  -2  -3 -13    2.32   22.17
  -2  -3 -14  145.77   25.96
  -2  -3 -14   90.22   23.70
  -2  -3 -14  118.17   28.93
   2   3  14   78.44   32.30
  -2  -3 -14  139.06   24.06
  -2  -3 -14  127.33   23.09
  -2  -3 -15    4.17   24.35
  -2  -3 -15    6.64   25.39
   2   3  15  -30.16   30.34
  -2  -3 -15   14.96   21.55
  -2  -3 -15  -14.81   21.75
  -2  -3 -16 1292.59   74.23
  -2  -3 -16 1140.63   75.73
  -2  -3 -16 1365.02   86.88
  -2  -3 -16 1124.77   78.17
  -2  -3 -16  889.32   67.93
  -2  -3 -17 1227.24   58.39
  -2  -3 -17 1353.20   72.66
  -2  -3 -17 1514.84   81.12
  -2  -3 -17 1271.71   75.70
  -2  -3 -18   74.83   28.17
  -2  -3 -18  101.44   30.46
  -2  -3 -18   86.91   38.28
  -2  -3 -18   56.80   25.43
  -2  -3 -19  718.04   46.36
  -2  -3 -19  666.77   49.78
  -2  -3 -19  729.63   59.29
  -2  -3 -19  593.55   45.66
  -2  -3 -20  255.60   33.66
  -2  -3 -20  266.94   40.31
  -2  -3 -20  226.05   27.65
  -2  -3 -21   -3.61   31.55
  -2  -3 -21   50.23   40.23
  -2  -3 -21    7.98   25.00
  -2  -3 -22   53.03   27.85
  -2  -3 -22   54.75   22.67
  -2  -3 -23  -17.83   27.10
  -2  -3 -23   -8.80   22.55
  -2  -3 -24   16.38   24.73
  -2  -3 -24   -0.24   20.99
  -2  -3 -25    9.67   24.16
  -2  -3 -25   20.37   25.43
  -2  -3 -26   13.09   23.60
  -2  -3 -26   13.01   23.50
  -2  -4  23   14.25   35.69
  -2  -4  23    1.57   25.98
  -2  -4  23   36.81   27.38
  -2  -4  23   36.92   26.03
   2   4 -23  -18.36   25.67
  -2  -4  22    2.46   36.98
  -2  -4  22   24.01   25.89
   2   4 -22    5.62   25.26
  -2  -4  21   27.72   38.45
  -2  -4  21   -9.89   28.25
   2   4 -21   -9.34   25.85
  -2  -4  20   55.67   37.85
  -2  -4  20   19.23   28.63
   2   4 -20   30.82   28.45
  -2  -4  19   -2.95   33.06
  -2  -4  19  -28.94   28.98
   2   4 -19  -14.56   28.37
  -2  -4  18    2.96   32.15
  -2  -4  18   -0.17   30.66
   2   4 -18   28.45   27.13
  -2  -4  17  -12.95   32.80
  -2  -4  17   19.36   28.83
  -2  -4  17   28.91   30.04
   2   4 -17   15.86   29.37
  -2  -4  16   48.79   30.89
  -2  -4  16   -6.04   28.76
  -2  -4  16    2.16   24.66
  -2  -4  16   52.68   31.26
   2   4 -16  -20.83   29.77
  -2  -4  15   10.76   29.07
  -2  -4  15  -19.64   25.43
  -2  -4  15   15.06   27.54
   2   4 -15   -2.90   27.07
  -2  -4  14  -16.70   29.25
  -2  -4  14  -16.30   23.37
  -2  -4  14   16.86   29.96
   2   4 -14   34.32   26.15
  -2  -4  13    8.35   28.11
  -2  -4  13  -10.00   25.67
  -2  -4  13   12.13   29.09
   2   4 -13    8.48   26.89
  -2  -4  12    8.22   21.90
  -2  -4  12   33.54   25.08
  -2  -4  12    5.34   24.51
  -2  -4  12   48.34   28.17
   2   4 -12   11.50   24.49
  -2  -4  11   48.46   26.40
  -2  -4  11   55.12   23.16
  -2  -4  11   47.76   26.54
  -2  -4  11   91.64   25.00
  -2  -4  11   67.98   27.34
   2   4 -11   97.29   24.87
  -2  -4  10   47.67   25.51
  -2  -4  10   60.94   24.17
  -2  -4  10   63.28   26.46
  -2  -4  10   63.61   26.86
  -2  -4  10   70.51   25.76
   2   4 -10   89.54   23.67
  -2  -4   9   80.35   27.28
  -2  -4   9  114.54   27.35
  -2  -4   9  109.61   25.74
  -2  -4   9   64.08   24.20
  -2  -4   9  109.32   27.36
   2   4  -9   69.06   20.45
  -2  -4   8  196.67   26.87
  -2  -4   8  206.67   27.30
  -2  -4   8  278.76   30.53
  -2  -4   8  244.88   27.10
  -2  -4   8  223.61   24.85
   2   4  -8  216.44   23.88
  -2  -4   7  172.04   25.20
  -2  -4   7  185.28   31.20
  -2  -4   7  202.47   25.16
  -2  -4   7  167.11   26.69
  -2  -4   6   16.61   24.47
  -2  -4   6   68.28   30.22
  -2  -4   6   43.56   25.21
   2   4  -6   26.42   39.65
  -2  -4   5 1605.70  100.27
  -2  -4   4   47.11   35.54
  -2  -4   3  124.55   37.10
   2   4  -3   84.86   29.23
  -2  -4   2   35.18   36.44
   2   4  -2   85.45   24.86
  -2  -4   1   -5.47   34.78
   2   4  -1  -16.84   27.55
   2   4  -1   -1.29   28.44
   2   4   0   89.06   28.78
   2   4   0   85.90   46.27
   2   4   0   79.67   32.95
   2   4   1  763.30   58.42
   2   4   1  677.02   98.26
   2   4   1  714.94   86.20
   2   4   2  146.71   31.50
   2   4   2   99.04   45.13
   2   4   2  125.98   36.75
   2   4   3  306.72   33.25
   2   4   3  197.82   49.44
   2   4   3  245.01   49.36
   2   4   4 1278.58   82.97
   2   4   4 1035.76   94.25
  -2  -4  -4 1183.24   94.85
   2   4   4 1264.16   84.03
   2   4   5  542.92   40.45
   2   4   5  603.48   61.50
  -2  -4  -5  741.71   90.69
   2   4   5  661.66   58.00
   2   4   6  233.36   48.23
   2   4   6  275.42   48.39
  -2  -4  -6  226.17   49.42
   2   4   7 1191.91   71.60
  -2  -4  -7  866.99   64.63
   2   4   7 1088.24   80.00
  -2  -4  -7 1074.24   80.28
   2   4   8    6.26   30.29
  -2  -4  -8  -25.73   24.17
  -2  -4  -8  -21.25   30.12
   2   4   9  -43.03   30.04
  -2  -4  -9   -7.73   18.68
  -2  -4  -9  -37.07   27.15
   2   4  10   28.75   26.49
  -2  -4 -10   12.89   19.56
  -2  -4 -10    3.78   22.83
   2   4  11  442.92   31.66
  -2  -4 -11  331.75   23.42
  -2  -4 -11  265.18   30.82
  -2  -4 -11  271.23   37.13
  -2  -4 -11  291.84   31.53
  -2  -4 -12   22.74   23.71
  -2  -4 -12   -0.77   21.82
  -2  -4 -12   10.80   20.22
   2   4  12    8.11   40.74
  -2  -4 -12   18.78   20.95
  -2  -4 -13  685.02   39.77
   2   4  13  567.91   44.14
  -2  -4 -13  539.61   49.74
  -2  -4 -13  658.39   46.01
   2   4  13  567.56   58.84
  -2  -4 -13  564.30   43.57
  -2  -4 -14   -9.58   26.03
  -2  -4 -14    1.63   22.86
  -2  -4 -14  -41.83   25.85
   2   4  14   26.66   32.43
  -2  -4 -14  -14.31   20.26
  -2  -4 -15  464.09   37.25
  -2  -4 -15  395.79   39.32
  -2  -4 -15  533.56   49.34
   2   4  15  308.65   41.36
  -2  -4 -15  353.08   32.97
  -2  -4 -16   82.64   30.06
  -2  -4 -16   57.95   27.27
  -2  -4 -16   83.13   32.25
  -2  -4 -17  501.90   32.59
  -2  -4 -17  427.90   39.63
  -2  -4 -17  444.70   39.82
  -2  -4 -18   26.68   31.57
  -2  -4 -18   -5.93   29.68
  -2  -4 -18  -27.85   37.45
  -2  -4 -19  133.53   30.85
  -2  -4 -19  109.14   30.88
  -2  -4 -19   83.69   38.90
  -2  -4 -20  192.21   30.52
  -2  -4 -20  149.81   30.07
  -2  -4 -20  221.53   42.97
  -2  -4 -21   69.77   28.54
  -2  -4 -21   85.14   28.49
  -2  -4 -21   82.27   41.15
  -2  -4 -22   34.94   28.80
  -2  -4 -22    6.33   27.40
  -2  -4 -22   30.21   38.61
  -2  -4 -23   18.90   26.26
  -2  -4 -23   -9.22   26.29
  -2  -4 -24   79.95   25.47
  -2  -4 -24   45.95   24.18
  -2  -5  22   -3.38   39.04
  -2  -5  22    1.40   25.06
  -2  -5  22    0.80   24.62
   2   5 -22   -6.71   23.98
  -2  -5  21    4.76   38.05
  -2  -5  21    6.15   27.30
  -2  -5  21   -2.07   25.54
   2   5 -21   18.62   24.98
  -2  -5  20   -6.56   38.69
  -2  -5  20   22.50   29.59
   2   5 -20  -24.49   26.11
  -2  -5  19   54.12   36.10
  -2  -5  19    4.78   30.51
  -2  -5  19   26.93   27.96
   2   5 -19    1.88   25.08
  -2  -5  18   69.32   31.00
  -2  -5  18   38.80   28.56
   2   5 -18    9.13   28.10
  -2  -5  17    2.44   29.10
  -2  -5  17  -12.61   24.46
  -2  -5  17   37.95   27.47
   2   5 -17  -14.97   27.75
  -2  -5  16    9.22   30.72
  -2  -5  16  -31.10   25.27
  -2  -5  16   38.59   28.02
   2   5 -16  -16.72   27.61
  -2  -5  15   -7.28   30.34
  -2  -5  15   27.07   25.22
  -2  -5  15   32.02   27.65
   2   5 -15   13.97   27.76
  -2  -5  14   24.33   29.83
  -2  -5  14    3.09   30.78
  -2  -5  14   -6.13   26.30
  -2  -5  14   18.55   28.33
   2   5 -14    4.49   26.93
  -2  -5  13   13.05   28.94
  -2  -5  13    1.47   27.27
  -2  -5  13  -14.86   24.45
  -2  -5  13  -27.57   27.81
   2   5 -13  -22.18   25.65
  -2  -5  12    4.00   28.50
  -2  -5  12  -31.44   32.20
  -2  -5  12   -1.62   24.66
  -2  -5  12   12.29   27.02
   2   5 -12   15.54   24.61
  -2  -5  11    8.58   27.34
  -2  -5  11   12.24   21.09
  -2  -5  11   26.50   28.64
  -2  -5  11   21.03   24.46
  -2  -5  11   27.97   26.55
   2   5 -11   45.81   23.07
  -2  -5  10   36.28   25.76
  -2  -5  10   38.55   22.16
  -2  -5  10   66.44   29.00
  -2  -5  10   56.20   24.67
  -2  -5  10   55.68   26.08
   2   5 -10   58.92   23.28
  -2  -5   9    9.34   25.17
  -2  -5   9   29.08   22.96
  -2  -5   9   15.06   28.35
  -2  -5   9    4.38   24.96
  -2  -5   9   -8.91   23.99
  -2  -5   8   10.76   23.89
  -2  -5   8    8.26   23.90
  -2  -5   8   -7.41   27.82
  -2  -5   8  -25.69   24.17
  -2  -5   8   -4.22   22.78
  -2  -5   7   10.60   24.17
  -2  -5   7   36.92   24.30
  -2  -5   7    2.90   25.41
  -2  -5   7   17.13   21.34
  -2  -5   6  183.53   24.25
  -2  -5   6  259.62   31.44
  -2  -5   6  221.95   27.36
  -2  -5   5   50.81   22.37
  -2  -5   5   83.39   28.31
  -2  -5   5   42.59   20.76
  -2  -5   4  813.00   72.70
  -2  -5   4  893.50   71.30
  -2  -5   4  927.83   53.91
  -2  -5   3  540.37   58.17
  -2  -5   3  580.29   53.53
  -2  -5   3  682.67   45.64
  -2  -5   2 1561.57  108.89
   2   5  -1  861.11   58.93
   2   5  -1  777.29   90.69
   2   5  -1  618.59   83.78
   2   5   0   74.08   33.44
   2   5   0   88.37   43.68
   2   5   0   76.55   30.93
   2   5   1 1548.24   97.36
   2   5   1 1294.42  130.28
   2   5   1 1362.09  117.36
   2   5   2   69.92   33.03
   2   5   2   95.25   39.21
   2   5   2  102.63   29.73
   2   5   3   29.77   29.80
   2   5   3   40.48   38.22
   2   5   3   54.69   29.14
   2   5   4  985.25   63.79
   2   5   4  678.72   73.87
   2   5   4  937.31   62.00
   2   5   5 1381.83   87.37
   2   5   5 1134.58   91.50
   2   5   6  342.49   39.52
  -2  -5  -6  342.85   39.85
   2   5   7   63.42   29.20
  -2  -5  -7   58.41   28.76
  -2  -5  -7   59.70   26.20
   2   5   8   59.63   26.71
  -2  -5  -8   57.31   28.44
   2   5   8   77.57   42.64
  -2  -5  -8   68.12   25.07
   2   5   9  273.62   30.50
  -2  -5  -9  171.52   21.37
  -2  -5  -9  202.48   36.54
  -2  -5  -9  256.37   25.81
  -2  -5  -9  232.90   27.03
  -2  -5 -10   83.87   20.62
  -2  -5 -10   89.88   25.34
  -2  -5 -10  101.35   23.33
  -2  -5 -11  106.70   21.32
  -2  -5 -11  101.11   25.25
  -2  -5 -11  122.38   23.00
  -2  -5 -12  321.93   30.19
  -2  -5 -12  245.06   31.52
   2   5  12  306.66   51.97
  -2  -5 -13   12.57   24.40
  -2  -5 -13   82.13   24.84
   2   5  13   27.25   36.32
  -2  -5 -14 2725.19   64.75
   2   5  14 2334.88  134.70
  -2  -5 -14 2467.78  137.81
  -2  -5 -15 1127.46   59.99
   2   5  15  971.11   63.62
  -2  -5 -15  828.49   63.38
  -2  -5 -15 1095.64   61.79
  -2  -5 -16  759.81   35.04
   2   5  16  711.14   45.68
  -2  -5 -16  647.97   54.47
  -2  -5 -16  791.48   44.04
  -2  -5 -17   24.67   30.63
  -2  -5 -17   18.25   26.70
  -2  -5 -17  -24.10   34.03
  -2  -5 -18   24.96   32.96
  -2  -5 -18   25.55   28.05
  -2  -5 -18  -32.85   35.50
  -2  -5 -19   16.49   29.38
  -2  -5 -19   -1.45   26.53
  -2  -5 -19  -57.55   40.05
  -2  -5 -20  -44.29   29.93
  -2  -5 -20    2.42   39.74
  -2  -5 -21   27.93   26.88
  -2  -5 -21   -5.28   39.87
  -2  -5 -22   21.09   28.12
  -2  -5 -22   22.54   38.13
  -2  -5 -23    6.22   25.34
  -2  -5 -24    4.14   24.81
  -2  -5 -24   -4.97   20.05
  -2  -5 -25   -0.75   24.54
  -2  -6  22   23.75   35.71
   2   6 -22   12.02   21.92
  -2  -6  22   13.70   27.50
  -2  -6  21   44.51   38.49
  -2  -6  21   23.00   25.51
  -2  -6  21   20.57   26.15
  -2  -6  20   -1.95   26.80
  -2  -6  20   11.44   21.80
  -2  -6  20  -16.50   29.80
   2   6 -20   13.16   22.40
  -2  -6  19    5.86   27.92
  -2  -6  19   31.05   24.17
  -2  -6  19   37.13   27.03
   2   6 -19   26.75   23.87
  -2  -6  18    0.31   31.13
  -2  -6  18    7.36   24.06
  -2  -6  18   13.42   27.53
   2   6 -18  -10.00   23.71
  -2  -6  17  -42.29   34.38
  -2  -6  17  -26.79   31.95
  -2  -6  17  -11.98   27.70
  -2  -6  17   37.77   22.54
  -2  -6  17   25.81   27.56
   2   6 -17   21.68   24.38
  -2  -6  16   47.50   37.66
  -2  -6  16   53.29   33.07
  -2  -6  16   13.08   27.26
  -2  -6  16   60.95   25.93
   2   6 -16   32.16   25.35
  -2  -6  15   28.74   34.06
  -2  -6  15   59.36   34.36
  -2  -6  15   39.56   24.85
  -2  -6  15   34.93   27.06
   2   6 -15   25.76   25.07
  -2  -6  14   68.12   33.51
  -2  -6  14   87.95   35.48
  -2  -6  14   40.80   27.71
  -2  -6  14   79.55   27.10
   2   6 -14   30.87   25.31
  -2  -6  13   62.05   32.81
  -2  -6  13   97.74   33.37
  -2  -6  13   24.43   24.74
  -2  -6  13  101.60   26.92
   2   6 -13   52.04   24.52
  -2  -6  12  -16.35   28.26
  -2  -6  12    9.67   33.87
  -2  -6  12   -8.62   24.65
  -2  -6  12  -29.34   25.81
  -2  -6  11  -13.59   30.30
  -2  -6  11   -5.77   33.10
  -2  -6  11    4.17   24.55
  -2  -6  11   33.45   25.75
  -2  -6  10    2.63   29.18
  -2  -6  10    8.14   34.67
  -2  -6  10   26.16   24.07
  -2  -6  10   22.40   25.58
  -2  -6   9  160.26   27.88
  -2  -6   9  171.20   25.39
  -2  -6   9  256.97   31.49
  -2  -6   9  222.71   26.03
  -2  -6   9  222.19   26.75
  -2  -6   8  215.78   29.61
  -2  -6   8  233.82   29.93
  -2  -6   8  362.48   36.07
  -2  -6   8  300.14   26.11
  -2  -6   8  210.24   25.06
  -2  -6   7  485.60   36.41
  -2  -6   7  628.97   48.71
  -2  -6   7  546.71   44.90
  -2  -6   6  561.70   40.24
  -2  -6   6  810.04   58.42
  -2  -6   6  758.56   50.37
  -2  -6   5  214.54   29.52
  -2  -6   5  307.58   38.77
  -2  -6   5  363.92   25.99
  -2  -6   5  249.94   30.51
  -2  -6   4  138.41   23.62
   2   6  -4  247.15   33.55
  -2  -6   4  268.14   25.40
  -2  -6   4  196.11   31.39
  -2  -6   3   28.93   20.77
   2   6  -3   58.64   32.50
  -2  -6   3   33.61   32.01
  -2  -6   3   55.40   25.37
  -2  -6   3   23.35   22.91
   2   6  -2   22.70   33.29
  -2  -6   2   71.06   30.60
  -2  -6   2   66.47   24.35
  -2  -6   2   28.87   23.73
   2   6  -1    8.89   34.37
  -2  -6   1   12.62   30.20
  -2  -6   1    4.72   23.20
   2   6   0   18.73   32.93
  -2  -6   0   27.49   27.43
  -2  -6   0   -3.54   21.52
   2   6   1  760.78   86.28
  -2  -6  -1  798.40   78.26
  -2  -6  -1  793.22   64.71
   2   6   2 1867.73  125.08
  -2  -6  -2 2465.16  132.50
  -2  -6  -2 1942.51  101.81
  -2  -6  -3  398.54   50.91
   2   6   4  307.88   42.04
  -2  -6  -4  377.70   45.36
   2   6   5  399.68   43.61
  -2  -6  -5  473.48   51.43
   2   6   6  172.75   27.68
  -2  -6  -6  130.63   26.47
  -2  -6  -6  181.62   23.46
   2   6   7   -3.67   24.78
  -2  -6  -7  -21.05   28.12
  -2  -6  -7   10.01   19.99
  -2  -6  -8  159.29   31.99
   2   6   8  126.08   35.55
  -2  -6  -9   20.36   29.64
  -2  -6 -10   86.11   21.51
  -2  -6 -10   96.45   29.47
  -2  -6 -11   29.16   22.75
  -2  -6 -11   35.63   27.90
  -2  -6 -12   43.82   24.96
  -2  -6 -12   18.41   27.35
  -2  -6 -13  298.62   33.21
  -2  -6 -13  208.09   27.13
  -2  -6 -14  496.42   35.16
   2   6  14  455.90   39.81
  -2  -6 -14  498.86   37.51
  -2  -6 -15   58.92   30.40
   2   6  15   28.32   31.01
  -2  -6 -15   57.17   28.73
  -2  -6 -16  251.80   30.73
   2   6  16  180.28   32.72
  -2  -6 -16  243.28   31.31
  -2  -6 -17    8.37   31.59
   2   6  17  -63.11   31.30
  -2  -6 -17   21.80   32.10
  -2  -6 -18  247.37   30.07
  -2  -6 -18  262.86   34.11
  -2  -6 -19    8.77   30.20
  -2  -6 -19   -3.99   34.53
  -2  -6 -20  -19.39   28.60
  -2  -6 -20  -25.25   38.35
  -2  -6 -21  -28.15   27.62
  -2  -6 -21   -0.41   37.73
  -2  -6 -22   79.90   25.44
  -2  -6 -22   48.46   34.44
  -2  -6 -23   11.47   25.38
  -2  -6 -24   14.46   23.47
  -2  -6 -24   11.54   20.06
  -2  -7  20    8.44   23.45
  -2  -7  20    2.82   29.16
  -2  -7  19   -4.80   35.69
  -2  -7  19   12.85   27.05
  -2  -7  19    1.44   27.55
  -2  -7  18   22.34   36.17
  -2  -7  18   -3.18   27.34
  -2  -7  18   19.94   27.91
  -2  -7  17   55.83   39.94
  -2  -7  17   28.13   30.45
  -2  -7  17   46.07   28.51
  -2  -7  16   43.49   35.90
  -2  -7  16   24.80   32.55
  -2  -7  16   17.51   28.83
  -2  -7  16   27.10   26.03
  -2  -7  15    2.92   36.10
  -2  -7  15  -22.12   30.86
  -2  -7  15  -20.78   28.27
  -2  -7  15   -0.51   25.63
  -2  -7  14   35.77   39.34
  -2  -7  14   -8.79   32.72
  -2  -7  14    5.57   25.53
  -2  -7  14   -6.06   26.79
  -2  -7  13   11.65   36.21
  -2  -7  13  -23.77   37.40
  -2  -7  13   21.95   25.22
  -2  -7  13    7.89   27.88
  -2  -7  12   30.52   35.21
  -2  -7  12   22.86   34.84
  -2  -7  12  -25.15   25.29
  -2  -7  12    1.19   27.44
  -2  -7  11   37.62   34.63
  -2  -7  11   96.04   36.22
  -2  -7  11   28.30   24.77
  -2  -7  11   49.72   27.98
  -2  -7  10    4.39   33.04
  -2  -7  10   19.84   32.47
  -2  -7  10   10.77   22.56
  -2  -7  10   23.23   27.44
  -2  -7   9  367.24   33.25
  -2  -7   9  528.37   43.16
  -2  -7   9  464.07   40.91
  -2  -7   8    9.69   29.56
  -2  -7   8  -17.10   35.37
  -2  -7   8  -11.65   27.91
  -2  -7   7   47.65   28.84
   2   7  -7   49.93   27.97
  -2  -7   7   72.26   27.50
   2   7  -6 1709.85   76.76
  -2  -7   6 1996.20   52.15
  -2  -7   6 1835.18   80.27
  -2  -7   5  158.03   29.00
   2   7  -5  188.41   30.30
  -2  -7   5  223.10   32.70
  -2  -7   5  174.00   31.67
  -2  -7   4    2.17   26.83
   2   7  -4   14.43   28.96
  -2  -7   4    3.44   21.19
  -2  -7   4   26.71   29.51
   2   7  -3  158.95   35.12
  -2  -7   3  208.40   32.55
  -2  -7   3  203.46   24.20
  -2  -7   3  136.65   31.22
   2   7  -2   48.38   28.98
  -2  -7   2   36.02   30.77
  -2  -7   2   40.64   22.18
  -2  -7   2   41.16   29.07
   2   7  -1  121.19   30.73
  -2  -7   1  195.47   32.26
  -2  -7   1  161.99   21.87
  -2  -7   1  138.02   28.04
   2   7   0  272.31   42.30
  -2  -7   0  388.89   45.96
  -2  -7   0  422.19   40.51
   2   7   1  155.66   28.32
  -2  -7  -1  161.90   31.64
  -2  -7  -1  112.36   25.16
   2   7   2 1012.95   82.15
  -2  -7  -2 1150.49   79.40
  -2  -7  -2  898.38   63.10
   2   7   3 1486.22   99.21
  -2  -7  -3 1601.18  107.78
  -2  -7  -4  202.06   31.30
  -2  -7  -5  103.97   29.27
  -2  -7  -6  149.41   31.29
  -2  -7  -7   14.72   32.14
  -2  -7  -7   -8.32   23.58
  -2  -7  -8  185.60   33.54
   2   7   8  132.27   30.73
  -2  -7  -9  -18.66   29.52
  -2  -7  -9   19.44   27.68
   2   7   9  -11.57   33.53
  -2  -7 -10  120.21   31.59
  -2  -7 -11   40.46   25.26
  -2  -7 -11   35.32   28.33
  -2  -7 -12  393.50   36.57
  -2  -7 -12  422.66   38.75
  -2  -7 -13   69.54   27.81
  -2  -7 -13   58.28   28.65
  -2  -7 -14  920.78   61.95
   2   7  14  988.55   63.90
  -2  -7 -14 1029.20   59.48
  -2  -7 -15  265.35   31.66
   2   7  15  291.53   33.80
  -2  -7 -15  388.13   35.79
  -2  -7 -16   92.08   30.70
   2   7  16   79.08   32.98
  -2  -7 -16  119.40   30.45
  -2  -7 -17   15.35   29.19
   2   7  17  -11.55   30.36
  -2  -7 -17  -45.73   33.06
  -2  -7 -18  178.20   30.04
  -2  -7 -18  200.59   32.43
  -2  -7 -19   -7.20   27.17
  -2  -7 -19    1.78   35.13
  -2  -7 -20    9.37   27.46
  -2  -7 -20   -0.32   35.75
  -2  -7 -21   -0.43   24.14
  -2  -7 -21  -13.58   34.03
  -2  -7 -22   10.53   24.12
  -2  -7 -22  -15.81   33.51
  -2  -7 -23   -4.90   22.88
  -2  -7 -23   -8.69   21.93
  -2  -8  19   -0.33   30.94
  -2  -8  19   -6.76   24.49
  -2  -8  19    5.96   31.10
  -2  -8  18   22.96   32.38
  -2  -8  18   -3.98   24.69
  -2  -8  18   10.23   30.98
  -2  -8  17   15.90   36.04
  -2  -8  17    3.80   28.01
  -2  -8  17   30.73   29.29
  -2  -8  16   10.74   35.20
  -2  -8  16   -3.52   29.77
  -2  -8  16   40.69   30.57
  -2  -8  15   50.80   35.41
  -2  -8  15   52.09   30.70
  -2  -8  15   32.59   30.17
  -2  -8  15   44.10   30.37
  -2  -8  14    2.76   35.90
  -2  -8  14  -25.61   32.67
  -2  -8  14    2.01   27.03
  -2  -8  14  -28.95   30.39
  -2  -8  13  -22.34   39.24
  -2  -8  13  -55.17   31.52
  -2  -8  13    5.45   28.27
  -2  -8  13  -13.70   31.73
  -2  -8  12    7.23   36.22
  -2  -8  12   19.06   35.85
  -2  -8  12   -8.85   25.67
  -2  -8  12   23.30   29.83
  -2  -8  11    2.95   38.71
  -2  -8  11   10.67   33.35
  -2  -8  11   34.25   26.36
  -2  -8  11    4.42   30.45
  -2  -8  10   34.79   38.17
  -2  -8  10    9.40   35.21
  -2  -8  10  -10.45   31.95
  -2  -8   9  -39.51   37.15
  -2  -8   9  -17.63   35.03
  -2  -8   8  558.67   42.53
  -2  -8   7  100.82   33.72
  -2  -8   7  120.74   24.07
  -2  -8   7   75.93   34.04
  -2  -8   6  -10.63   31.05
  -2  -8   6  -32.35   23.07
  -2  -8   6  -13.53   35.56
  -2  -8   5   70.30   29.76
  -2  -8   5  112.08   25.40
  -2  -8   5   95.48   33.18
  -2  -8   4  -31.97   24.55
  -2  -8   4   -1.45   32.53
  -2  -8   3  223.17   33.85
  -2  -8   3  252.60   25.47
  -2  -8   3  219.11   34.76
  -2  -8   2  -12.73   31.90
  -2  -8   2  -30.81   22.44
  -2  -8   2   -8.12   30.10
  -2  -8   1  317.61   36.33
  -2  -8   1  229.99   24.57
  -2  -8   1  186.32   31.28
  -2  -8   0 1189.23   60.27
  -2  -8   0  994.06   68.67
  -2  -8  -1   73.89   31.26
  -2  -8  -1   34.43   21.30
  -2  -8  -2  524.36   51.15
  -2  -8  -2  302.18   36.71
  -2  -8  -3  118.78   32.57
  -2  -8  -4   23.38   31.90
  -2  -8  -5  -13.29   31.50
  -2  -8  -6   19.86   31.88
  -2  -8  -7  -21.05   32.88
  -2  -8  -8   -1.62   35.29
  -2  -8  -9  120.48   34.27
  -2  -8  -9  125.23   25.40
  -2  -8 -10  -11.40   29.92
  -2  -8 -11   28.43   31.44
  -2  -8 -12 1038.54   66.54
  -2  -8 -13  -14.59   28.90
   2   8  14   -8.84   31.50
  -2  -8 -14   -0.22   26.56
  -2  -8 -15  253.04   30.15
   2   8  15  335.38   37.17
  -2  -8 -15  370.57   32.12
  -2  -8 -16   -2.59   27.68
   2   8  16    0.40   31.18
  -2  -8 -16   29.34   30.42
  -2  -8 -17   10.26   26.81
   2   8  17  -32.89   31.05
  -2  -8 -17  -10.45   31.26
  -2  -8 -18   50.91   26.26
  -2  -8 -18   51.65   32.64
  -2  -8 -19   29.98   25.79
  -2  -8 -19   45.04   33.80
  -2  -8 -20   15.71   23.16
  -2  -8 -20    8.68   32.79
  -2  -8 -21   -3.66   21.76
  -2  -8 -21    4.62   33.90
  -2  -9  17   -0.29   22.40
  -2  -9  17    5.40   29.07
  -2  -9  16   16.44   29.82
  -2  -9  16   -7.90   25.03
  -2  -9  16   17.00   29.82
  -2  -9  15   13.65   32.86
  -2  -9  15    0.66   25.88
  -2  -9  15   15.36   29.54
  -2  -9  14   25.76   31.37
  -2  -9  14   -2.82   26.37
  -2  -9  14    6.17   33.83
  -2  -9  13   12.51   32.97
  -2  -9  13   10.40   28.45
  -2  -9  13   12.10   28.37
  -2  -9  13   29.34   35.17
  -2  -9  12   -3.43   33.33
  -2  -9  12  -15.61   32.42
  -2  -9  12   19.31   28.34
  -2  -9  12    1.13   33.62
  -2  -9  11   98.72   37.89
  -2  -9  11   64.80   34.52
  -2  -9  11   16.93   35.77
  -2  -9  10  187.77   34.96
  -2  -9  10  253.80   35.09
  -2  -9  10  243.31   38.27
  -2  -9   9    1.15   37.72
  -2  -9   9    0.14   37.29
  -2  -9   8  940.52   73.89
  -2  -9   8 1493.06   89.10
  -2  -9   8 1084.17   64.90
  -2  -9   8 1391.65   88.68
  -2  -9   7  157.97   34.41
  -2  -9   7  195.32   39.87
  -2  -9   7  127.65   62.96
  -2  -9   6  242.42   34.03
  -2  -9   6  255.95   44.49
  -2  -9   5  511.07   35.37
  -2  -9   5  524.74   46.98
  -2  -9   4    9.29   28.82
  -2  -9   4   -3.32   32.55
  -2  -9   3  491.56   34.05
  -2  -9   3  413.40   38.35
  -2  -9   2  206.51   33.68
  -2  -9   2  125.76   25.90
  -2  -9   2   82.79   27.23
  -2  -9   1   35.49   29.61
  -2  -9   1  -19.53   22.99
  -2  -9   1   17.13   23.45
  -2  -9   0  165.07   33.47
  -2  -9   0  138.16   22.96
  -2  -9  -1  161.29   33.92
  -2  -9  -1   70.50   29.31
  -2  -9  -2   15.83   30.25
  -2  -9  -2   11.70   22.22
  -2  -9  -3   32.62   37.09
  -2  -9  -4    6.72   35.09
  -2  -9  -5   52.67   37.91
  -2  -9  -6   89.56   38.80
  -2  -9  -7   18.09   35.23
  -2  -9  -8   -3.99   33.76
  -2  -9  -8    6.27   30.27
  -2  -9  -9   15.63   32.84
  -2  -9  -9   -3.18   26.55
  -2  -9 -10   10.53   31.01
  -2  -9 -10    8.06   28.48
  -2  -9 -11  288.55   35.92
  -2  -9 -12  253.85   32.49
  -2  -9 -13  523.23   42.70
   2   9  14  208.30   33.69
   2   9  15   83.81   31.13
  -2  -9 -15  142.85   29.60
   2   9  16   17.71   29.20
  -2  -9 -16   29.42   28.12
  -2  -9 -17  -15.90   31.59
  -2  -9 -18   25.27   32.23
  -2  -9 -19   -3.27   33.68
  -2  -9 -20   -5.41   32.64
   2  10 -15    0.18   19.92
  -2 -10  15   25.58   23.73
  -2 -10  15   18.87   25.12
   2  10 -14   35.12   19.51
  -2 -10  14   10.35   25.34
  -2 -10  14   -6.24   25.75
   2  10 -13   33.75   20.17
  -2 -10  13   24.44   25.26
  -2 -10  13    9.41   28.12
   2  10 -12   23.00   20.44
  -2 -10  12    6.98   27.56
  -2 -10  12   -4.97   29.63
   2  10 -11   85.06   21.11
  -2 -10  11  123.75   30.09
  -2 -10  11   96.98   29.20
   2  10 -10   56.83   20.86
  -2 -10  10   48.83   28.77
  -2 -10  10   66.24   30.19
  -2 -10  10   62.20   32.35
   2  10  -9    7.61   21.48
  -2 -10   9   -9.69   31.47
  -2 -10   9    4.97   30.93
  -2 -10   9    5.03   31.13
  -2 -10   8   21.35   30.56
  -2 -10   8   48.14   32.59
  -2 -10   8   48.35   33.69
  -2 -10   7   -1.04   31.22
  -2 -10   7  -23.73   32.21
  -2 -10   7  -35.43   31.71
  -2 -10   6   97.64   31.21
  -2 -10   6   59.35   32.65
  -2 -10   5  232.27   31.24
  -2 -10   5  167.81   30.43
  -2 -10   4  -19.39   31.46
  -2 -10   4  -10.72   27.13
  -2 -10   3  -14.45   30.03
  -2 -10   3  -14.66   25.14
  -2 -10   2  283.22   33.91
  -2 -10   2  242.01   29.99
  -2 -10   2  153.01   24.32
  -2 -10   1  145.10   33.88
  -2 -10   1   77.43   28.63
  -2 -10   0   -2.34   33.62
  -2 -10  -1  104.68   34.57
  -2 -10  -2   65.29   35.56
  -2 -10  -3    7.09   38.97
  -2 -10  -4  -11.86   36.03
  -2 -10  -5  107.30   36.50
  -2 -10  -6  335.65   41.09
  -2 -10  -7    2.05   37.28
  -2 -10  -7   -9.35   30.77
  -2 -10  -8   60.24   35.16
  -2 -10  -8  132.07   32.91
  -2 -10  -9  308.72   36.69
  -2 -10  -9  348.76   33.89
  -2 -10 -10  150.12   32.96
  -2 -10 -10  237.82   33.28
  -2 -10 -11   98.14   33.68
  -2 -10 -12    9.86   30.80
   2  10  13  398.33   35.00
   2  10  14  114.06   30.91
   2  10  15   96.52   28.50
  -2 -10 -15  152.66   30.21
  -2 -10 -16    7.32   29.56
  -2 -10 -17    7.04   32.61
  -2 -10 -18   34.17   33.94
  -2 -11  13   76.22   23.38
   2  11 -13  104.58   31.65
  -2 -11  13  -47.32   20.00
  -2 -11  12  260.75   27.20
  -2 -11  12  124.53   21.25
  -2 -11  11   -9.84   25.45
  -2 -11  11   -0.60   20.05
  -2 -11  10  116.93   29.63
  -2 -11  10   66.31   21.94
  -2 -11   9  -24.53   28.84
  -2 -11   9  -18.38   22.58
  -2 -11   8   -4.40   31.41
  -2 -11   8   10.68   23.04
  -2 -11   7  308.07   33.66
  -2 -11   7  139.19   24.56
  -2 -11   6  -33.74   28.48
  -2 -11   5  324.16   26.84
  -2 -11   2  119.33   32.30
  -2 -11   1   23.12   35.74
  -2 -11   0   -4.62   32.47
  -2 -11  -1   -4.89   33.98
  -2 -11  -2   76.39   34.78
  -2 -11  -3  134.35   34.34
  -2 -11  -4  130.34   37.26
  -2 -11  -5   55.26   33.30
  -2 -11  -6   13.12   33.51
  -2 -11  -6   -4.44   31.28
  -2 -11  -7  104.03   34.69
  -2 -11  -7   81.64   31.11
  -2 -11  -8   -2.95   33.00
  -2 -11  -8   13.24   29.39
  -2 -11  -9  -14.56   30.61
  -2 -11  -9   30.87   28.88
  -2 -11 -10   89.15   29.20
  -2 -11 -10  103.18   27.19
  -2 -11 -11  104.05   30.42
   2  11  12   34.79   30.05
   2  11  13  216.75   30.64
   2  11  14   80.93   27.85
  -2 -11 -15    5.76   29.21
  -2 -12   9   25.07   25.75
   2  12  -9   12.66   27.85
  -2 -12   8   12.22   26.70
   2  12  -8    6.70   29.67
  -2 -12   7    8.77   27.86
   2  12  -7   14.71   29.88
  -2 -12   6   20.69   31.71
   2  12  -6    3.74   29.48
   2  12  -5  -35.32   29.84
   2  12  -4    4.66   28.88
   2  12  -3  -23.55   27.21
  -2 -12   2   -5.32   33.23
   2  12  -2   -0.36   25.01
  -2 -12   1   16.07   32.47
  -2 -12   0   27.76   35.44
  -2 -12  -1    6.17   32.16
  -2 -12  -2   15.96   34.78
  -2 -12  -3   30.14   33.99
  -2 -12  -3   44.31   33.39
  -2 -12  -4   65.82   33.99
  -2 -12  -4   57.93   30.17
  -2 -12  -5   -3.02   34.60
  -2 -12  -5    1.48   28.50
  -2 -12  -6    7.41   30.50
  -2 -12  -6   47.12   28.60
  -2 -12  -7    8.83   32.01
  -2 -12  -7    8.87   27.49
  -2 -12  -8   36.95   29.38
  -2 -12  -8   29.51   26.87
  -2 -12  -9  142.93   29.77
  -2 -12  -9  169.13   26.91
  -2 -12 -10   15.71   25.43
   2  12  11   92.62   27.98
  -2 -12 -11   88.09   25.63
   2  12  12   17.45   24.85
  -2 -13   3  -66.05   21.19
  -2 -13   2   -5.00   29.31
  -2 -13   2   31.11   22.21
  -2 -13   1  103.75   31.02
  -2 -13   1   87.61   24.17
  -2 -13   0   56.34   31.42
  -2 -13   0   60.62   25.94
  -2 -13  -1   -4.48   29.77
  -2 -13  -1   -0.42   25.37
  -2 -13  -2  -13.27   29.55
  -2 -13  -2   -2.71   26.41
  -2 -13  -3    1.28   31.30
  -2 -13  -3    4.21   25.46
  -2 -13  -4   -1.71   30.00
  -2 -13  -4   -5.67   26.71
  -2 -13  -5   16.02   29.22
  -2 -13  -5   29.02   26.21
  -2 -13  -6   -1.23   27.07
  -2 -13  -6    5.00   25.63
  -3  12   7   26.36   30.41
   3 -12  -7   23.63   22.74
  -3  12   7   25.63   28.09
  -3  12   6   76.93   31.30
   3 -12  -6   36.57   21.75
  -3  12   6   32.96   29.23
  -3  12   5   32.43   30.39
   3 -12  -5   10.20   22.94
  -3  12   5   -1.32   29.49
  -3  12   4  145.75   29.87
   3 -12  -4   96.51   25.58
   3 -12  -4  145.56   33.69
  -3  12   4  123.12   29.49
   3 -12  -3   62.16   26.83
   3 -12  -3   56.00   26.38
   3 -12  -3   77.54   31.00
   3 -12  -2   -1.66   27.04
   3 -12  -2   26.01   29.70
   3 -12  -2   39.21   38.12
   3 -12  -1   26.13   26.06
   3 -12  -1   45.22   28.50
   3 -12  -1   52.97   37.89
   3 -12   0   21.69   25.45
   3 -12   0   67.49   28.19
   3 -12   0   39.30   37.64
   3 -12   1   27.94   24.89
   3 -12   1   36.77   26.30
   3 -12   1   29.83   40.35
   3 -12   2   88.10   25.21
   3 -12   2  116.01   26.15
   3 -12   2  118.95   36.08
   3 -12   3   -9.37   23.71
  -3  12  -3   26.69   24.57
   3 -12   3    8.14   24.07
   3 -12   3   12.25   37.22
   3 -12   4   34.82   23.38
  -3  12  -4   51.12   24.01
   3 -12   4   27.99   22.00
   3 -12   4   15.51   33.14
   3 -12   5   48.78   22.74
  -3  12  -5   75.36   24.79
   3 -12   5   63.24   21.70
   3 -12   5   78.16   35.01
  -3  12  -6   80.45   25.59
   3 -12   6   89.53   21.98
   3 -12   6  100.45   33.37
  -3  12  -7   -5.05   26.60
   3 -12   7   12.68   19.30
   3 -12   7   -0.37   30.96
  -3  12  -8   -3.17   26.09
   3 -12   8   26.26   18.81
   3 -12   8   29.81   29.35
  -3  12  -9    0.17   25.64
   3 -12   9  -50.33   18.04
   3 -12   9   30.82   29.34
  -3  11  11   23.59   36.77
  -3  11  11    6.47   28.94
  -3  11  10   79.50   39.08
  -3  11  10   84.42   30.19
  -3  11   9   51.53   36.19
   3 -11  -9   22.97   22.02
  -3  11   9   -1.88   30.76
  -3  11   8   58.68   35.83
   3 -11  -8    6.15   22.92
  -3  11   8  -17.02   32.75
  -3  11   7   11.39   35.67
   3 -11  -7   21.20   25.51
  -3  11   7   11.39   31.09
   3 -11  -6   15.09   25.71
   3 -11  -6   81.05   34.43
  -3  11   6   -6.25   34.85
   3 -11  -5   35.33   31.88
   3 -11  -5   11.69   27.66
   3 -11  -5    5.77   32.96
   3 -11  -5   17.42   40.24
   3 -11  -4   44.13   31.16
   3 -11  -4   85.71   33.01
   3 -11  -4   38.01   43.62
   3 -11  -3  157.27   31.63
   3 -11  -3  204.64   32.11
   3 -11  -3   99.86   41.97
   3 -11  -2  112.91   30.97
   3 -11  -2  133.63   30.51
   3 -11  -2  110.58   44.58
   3 -11  -1    8.97   29.97
   3 -11  -1   26.05   29.35
   3 -11  -1   14.76   42.97
   3 -11   0   71.38   29.81
   3 -11   0   88.35   28.70
   3 -11   0  110.06   40.36
   3 -11   1   -0.40   30.27
  -3  11  -1   29.11   24.19
   3 -11   1   39.43   27.94
   3 -11   1   53.86   38.55
   3 -11   2  166.06   30.81
  -3  11  -2  124.03   25.63
   3 -11   2  190.88   26.89
   3 -11   2  157.45   36.69
   3 -11   3  238.56   30.32
  -3  11  -3  163.83   27.02
   3 -11   3  252.04   28.90
   3 -11   3  155.08   34.75
   3 -11   4   -2.57   25.42
  -3  11  -4  -25.42   25.09
   3 -11   4   -3.48   27.16
   3 -11   4   22.17   32.30
   3 -11   5  180.32   28.03
  -3  11  -5  195.99   30.50
   3 -11   5  249.23   28.36
   3 -11   5  184.18   31.54
  -3  11  -6   -8.47   24.82
   3 -11   6    8.68   25.44
  -3  11  -6   19.35   28.34
   3 -11   6   46.37   25.96
   3 -11   6   15.69   29.25
  -3  11  -7  -18.98   25.22
   3 -11   7    2.16   22.26
  -3  11  -7  -19.21   27.51
   3 -11   7   -5.77   25.23
   3 -11   7   29.43   28.58
  -3  11  -8  -16.26   25.58
  -3  11  -8   -3.69   29.69
   3 -11   8    7.84   24.37
   3 -11   8   -3.96   27.70
  -3  11  -9    7.47   26.41
  -3  11  -9    9.96   28.61
   3 -11   9   21.91   25.24
   3 -11   9   13.62   26.72
  -3  11 -10  -13.66   25.29
  -3  11 -10   10.12   26.99
   3 -11  10   17.71   23.80
  -3  11 -11   58.01   25.74
  -3  11 -11   83.75   26.05
   3 -11  11   62.04   22.04
  -3  11 -12   28.15   25.81
   3 -11  12   34.33   20.15
  -3  11 -13   34.13   25.19
   3 -11  13   53.37   18.65
  -3  10  14   15.77   27.47
  -3  10  13   54.77   30.98
  -3  10  12   31.35   31.66
  -3  10  11   67.56   40.60
  -3  10  11   18.80   31.08
  -3  10  10   16.56   40.57
   3 -10 -10  -22.64   23.61
  -3  10  10  -27.64   32.19
  -3  10   9   -3.83   37.85
  -3  10   9    0.32   34.34
  -3  10   8    4.93   39.24
   3 -10  -8    0.59   27.36
   3 -10  -8   32.38   35.80
  -3  10   8  -13.14   34.87
   3 -10  -7   27.70   32.94
   3 -10  -7  -27.55   27.86
   3 -10  -7  -17.45   33.65
  -3  10   7  -33.39   32.88
   3 -10  -6  -29.52   32.62
   3 -10  -6   11.55   35.43
   3 -10  -6   24.96   46.64
   3 -10  -5   -4.09   32.20
   3 -10  -5   44.07   33.87
   3 -10  -5   45.58   48.24
   3 -10  -4   79.90   35.00
   3 -10  -4   88.91   32.99
   3 -10  -4   72.62   49.44
   3 -10  -3  394.77   38.80
   3 -10  -3  399.69   33.39
   3 -10  -3  303.41   47.96
   3 -10  -2  180.57   34.80
   3 -10  -2  155.28   29.96
   3 -10  -2  154.10   42.07
   3 -10  -1   -5.00   33.33
  -3  10   1  -23.13   24.99
   3 -10  -1   13.48   29.04
   3 -10  -1  -33.06   40.01
   3 -10   0   12.31   30.06
  -3  10   0   30.48   25.98
   3 -10   0   47.45   29.20
   3 -10   0   38.38   37.26
   3 -10   1    7.11   32.70
  -3  10  -1   -2.52   26.25
   3 -10   1   35.36   28.03
   3 -10   1   28.28   33.54
   3 -10   2  409.21   37.03
  -3  10  -2  331.96   31.55
   3 -10   2  412.77   35.63
   3 -10   2  243.31   34.08
  -3  10  -3  541.60   44.38
   3 -10   3  510.16   39.80
  -3  10  -3  508.47   36.19
   3 -10   3  588.43   42.02
  -3  10  -4   11.73   28.61
  -3  10  -4  -21.99   27.28
   3 -10   4    3.61   33.26
   3 -10   4    2.38   28.67
  -3  10  -5   18.20   27.72
   3 -10   5  -11.35   27.52
  -3  10  -5  -16.24   28.05
   3 -10   5    6.03   30.77
   3 -10   5   -0.64   27.22
  -3  10  -6   17.88   27.95
   3 -10   6  -29.84   26.24
  -3  10  -6  -35.60   27.81
   3 -10   6  -28.54   31.31
   3 -10   6   10.95   29.49
  -3  10  -7    0.14   27.95
   3 -10   7   14.42   26.34
  -3  10  -7   12.32   31.05
   3 -10   7   37.44   33.87
   3 -10   7   21.47   26.70
  -3  10  -8   80.60   28.78
   3 -10   8   56.55   24.66
  -3  10  -8   75.94   31.48
   3 -10   8   66.05   31.94
  -3  10  -9    8.76   28.81
  -3  10  -9   18.70   28.14
   3 -10   9   15.12   32.91
   3 -10   9   12.83   26.00
  -3  10 -10  193.63   30.18
  -3  10 -10  208.05   30.82
   3 -10  10  205.25   33.35
   3 -10  10  173.48   27.16
  -3  10 -11  -11.64   29.19
   3 -10  11   -7.92   30.73
  -3  10 -12  342.82   35.91
   3 -10  12  356.85   35.84
  -3  10 -13   35.10   29.83
  -3  10 -13   60.41   25.59
   3 -10  13   48.81   25.90
   3 -10  13   50.52   28.75
  -3  10 -14   12.28   30.22
  -3  10 -14   -6.32   23.62
   3 -10  14  -31.72   25.98
   3 -10  14   15.55   26.83
  -3  10 -15   17.91   28.34
  -3  10 -15    0.17   24.14
   3 -10  15  -17.90   23.70
   3 -10  15    8.17   26.65
  -3  10 -16   28.82   27.16
  -3  10 -16    0.01   22.54
   3 -10  16   11.98   22.35
   3 -10  16    7.85   25.41
   3  -9 -16    9.28   26.74
  -3   9  16   17.04   37.80
  -3   9  16   17.13   26.49
   3  -9 -15    3.01   25.58
  -3   9  15   -3.68   38.03
  -3   9  15    8.51   29.56
   3  -9 -14   24.02   26.44
  -3   9  14   29.64   32.86
   3  -9 -13    7.88   27.64
  -3   9  13  -45.28   31.80
   3  -9 -12   21.00   27.67
  -3   9  12  -30.71   33.84
   3  -9 -11   50.66   28.91
  -3   9  11  104.38   38.37
   3  -9 -11   62.38   24.51
  -3   9  11   31.59   32.72
   3  -9 -10   35.83   26.80
  -3   9  10   94.09   38.74
   3  -9 -10   18.38   26.37
  -3   9  10   28.03   32.33
   3  -9  -9   93.30   27.81
  -3   9   9  122.01   37.77
   3  -9  -9  122.10   29.31
   3  -9  -9  164.57   38.84
  -3   9   9  112.29   35.79
   3  -9  -8   63.39   26.44
   3  -9  -8   18.34   37.27
   3  -9  -8   66.72   29.72
   3  -9  -8   42.58   36.07
  -3   9   8   28.70   33.43
   3  -9  -7  141.86   27.10
   3  -9  -7  214.87   39.43
   3  -9  -7  201.51   35.73
   3  -9  -7  148.35   47.72
   3  -9  -6  -21.84   27.57
   3  -9  -6  -13.58   33.02
   3  -9  -6  -29.84   32.53
   3  -9  -6  -44.67   52.78
   3  -9  -5  184.56   26.45
   3  -9  -5  219.83   36.32
   3  -9  -5  271.73   35.19
   3  -9  -5  231.52   50.36
   3  -9  -4  -18.44   25.86
   3  -9  -4   -0.75   35.11
   3  -9  -4  -19.59   30.60
   3  -9  -4  -23.75   48.32
   3  -9  -3  227.77   35.28
   3  -9  -3  224.17   30.54
   3  -9  -3  178.20   46.78
   3  -9  -2  364.58   38.68
  -3   9   2  240.71   27.35
   3  -9  -2  282.72   29.22
   3  -9  -2  264.72   42.80
   3  -9  -1  170.44   37.11
  -3   9   1   78.24   26.48
   3  -9  -1  132.00   31.69
   3  -9  -1   88.48   39.29
  -3   9   0  414.30   40.65
   3  -9   0  457.17   40.47
  -3   9   0  344.45   29.52
   3  -9   0  495.78   43.33
   3  -9   0  283.30   37.11
  -3   9  -1  377.31   34.10
   3  -9   1  458.29   39.41
  -3   9  -1  409.73   36.84
   3  -9   1  428.20   39.43
   3  -9   1  264.92   34.68
  -3   9  -2   57.14   30.81
   3  -9   2   56.37   30.72
  -3   9  -2   63.33   28.37
   3  -9   2  187.05   34.51
   3  -9   2   69.32   31.69
  -3   9  -3  454.08   43.90
   3  -9   3  536.04   41.45
  -3   9  -3  472.17   38.09
   3  -9   3  596.87   52.17
  -3   9  -4   43.00   30.41
   3  -9   4    5.96   36.33
  -3   9  -4   36.13   30.18
   3  -9   4   43.30   35.65
   3  -9   4    4.19   29.52
   3  -9   4   35.17   28.91
  -3   9  -5   24.48   29.97
   3  -9   5   16.59   29.47
  -3   9  -5  -17.38   31.89
   3  -9   5  -13.16   38.83
   3  -9   5  -14.95   29.51
  -3   9  -6   30.64   28.39
   3  -9   6  -16.32   27.86
  -3   9  -6  -34.12   31.36
   3  -9   6    3.03   37.19
   3  -9   6   -3.05   29.53
  -3   9  -7   25.23   29.93
   3  -9   7   -6.58   26.89
  -3   9  -7   21.92   31.79
   3  -9   7   -4.05   36.80
   3  -9   7    0.94   31.05
  -3   9  -8  102.44   28.53
   3  -9   8   60.88   24.79
  -3   9  -8  110.37   32.55
   3  -9   8   86.52   36.42
   3  -9   8   94.97   29.21
  -3   9  -9   14.40   27.27
   3  -9   9  -17.24   23.92
   3  -9   9   32.11   34.78
   3  -9   9  -27.42   28.72
  -3   9 -10    5.61   30.80
   3  -9  10  -59.36   40.15
   3  -9  10  -34.96   31.24
  -3   9 -11  292.87   37.97
   3  -9  11  348.79   42.62
   3  -9  11  271.28   36.04
   3  -9  11  262.49   36.76
  -3   9 -12  502.88   38.04
  -3   9 -12  483.97   36.09
   3  -9  12  578.91   45.61
   3  -9  12  445.76   39.00
   3  -9  12  398.34   39.23
  -3   9 -13  164.45   30.52
  -3   9 -13  217.09   29.32
   3  -9  13  241.21   33.91
   3  -9  13  158.04   28.29
   3  -9  13  164.60   33.94
  -3   9 -14   73.06   29.36
  -3   9 -14   74.13   27.10
   3  -9  14   66.36   31.62
   3  -9  14   29.10   27.09
   3  -9  14   43.58   33.97
  -3   9 -15   68.97   28.60
  -3   9 -15   39.07   25.39
   3  -9  15   45.09   27.81
   3  -9  15   35.02   25.70
   3  -9  15   20.63   30.67
  -3   9 -16   22.95   27.49
  -3   9 -16   36.28   24.31
   3  -9  16   14.70   28.68
   3  -9  16   -5.40   24.60
   3  -9  16   15.06   30.87
  -3   9 -17   40.77   25.69
  -3   9 -17   72.72   21.92
   3  -9  17   60.24   27.06
   3  -9  17   41.40   23.55
   3  -9  17   60.31   29.15
  -3   9 -18   13.05   20.36
   3  -9  18   11.79   25.18
   3  -9  18    8.42   21.74
   3  -9  18   19.84   24.94
   3  -8 -18   38.68   30.08
  -3   8  18   39.54   35.82
  -3   8  18   24.75   26.27
   3  -8 -17   48.00   28.98
  -3   8  17   53.22   27.45
   3  -8 -16   12.17   27.79
  -3   8  16   30.03   39.46
  -3   8  16    4.49   31.97
   3  -8 -15   35.90   29.60
  -3   8  15   65.19   41.23
  -3   8  15   11.10   31.13
   3  -8 -14   14.86   29.96
  -3   8  14  -16.10   33.96
   3  -8 -13    7.39   27.57
  -3   8  13   18.38   35.40
   3  -8 -12  -13.84   29.98
  -3   8  12  -19.55   35.86
   3  -8 -11   41.41   30.04
   3  -8 -11   35.26   26.61
  -3   8  11   27.27   36.16
   3  -8 -10   86.63   28.83
  -3   8  10   66.88   39.62
   3  -8 -10   28.79   29.36
  -3   8  10    3.52   34.33
   3  -8  -9   43.19   29.29
   3  -8  -9   -0.44   29.32
  -3   8   9   39.37   34.55
   3  -8  -8  408.36   35.64
   3  -8  -8  324.13   37.00
   3  -8  -8  389.55   37.45
   3  -8  -8  306.13   50.83
   3  -8  -7  381.53   29.71
   3  -8  -7  336.45   38.05
   3  -8  -7  363.12   53.64
   3  -8  -6 2765.02   60.80
   3  -8  -6 2666.97   70.62
   3  -8  -6 2627.49   75.82
   3  -8  -6 2594.81  119.16
   3  -8  -5 1152.61   38.24
   3  -8  -5 1228.20   51.39
   3  -8  -5 1163.89   49.54
   3  -8  -5 1066.56   65.62
   3  -8  -4   19.46   22.59
   3  -8  -4   27.83   35.03
   3  -8  -4   20.36   29.77
   3  -8  -4   14.41   46.69
   3  -8  -3 1011.99   49.29
   3  -8  -3 1095.57   61.96
  -3   8   2  342.64   32.52
   3  -8  -2  421.24   24.68
   3  -8  -2  422.74   35.85
  -3   8   2  371.46   38.34
   3  -8  -2  448.68   40.32
   3  -8  -2  268.46   42.59
  -3   8   1   12.63   26.30
   3  -8  -1   -4.38   20.94
   3  -8  -1  -24.93   32.13
  -3   8   1  -43.92   25.43
   3  -8  -1   -6.15   31.83
   3  -8  -1  -46.42   35.14
  -3   8   0  122.83   29.20
   3  -8   0   93.72   20.96
   3  -8   0  102.25   35.42
  -3   8   0   86.92   26.56
   3  -8   0  111.01   31.07
   3  -8   0   62.90   32.44
  -3   8  -1  465.07   42.19
   3  -8   1  554.11   41.31
  -3   8  -1  434.66   31.56
   3  -8   1  448.79   42.12
  -3   8  -2    2.23   30.65
   3  -8   2  -10.99   29.75
  -3   8  -2  -22.88   31.41
   3  -8   2  -53.50   36.11
   3  -8   2    7.59   31.33
   3  -8   2  -40.20   30.15
  -3   8  -3   38.20   29.13
   3  -8   3   54.58   29.02
  -3   8  -3   31.07   30.23
   3  -8   3   55.31   36.99
   3  -8   3   49.68   31.33
  -3   8  -4    9.66   30.90
   3  -8   4   13.95   27.83
  -3   8  -4    1.97   31.57
   3  -8   4   18.51   37.61
   3  -8   4   11.57   30.77
  -3   8  -5   24.66   29.90
   3  -8   5    1.19   28.23
  -3   8  -5    4.65   31.91
   3  -8   5   44.48   37.16
   3  -8   5   35.58   28.68
  -3   8  -6   -9.13   28.13
   3  -8   6  -41.07   27.23
  -3   8  -6  -17.88   32.63
   3  -8   6    3.93   36.75
   3  -8   6  -28.54   28.74
  -3   8  -7  174.12   28.21
   3  -8   7  154.08   26.64
  -3   8  -7  201.16   35.99
   3  -8   7  214.11   37.13
   3  -8   7  170.66   30.58
  -3   8  -8  214.78   29.14
   3  -8   8  169.46   25.38
   3  -8   8  250.21   37.82
   3  -8   8  198.80   28.65
  -3   8  -9  217.37   31.65
   3  -8   9  178.81   26.39
   3  -8   9  185.18   29.03
   3  -8   9  265.98   38.08
  -3   8 -10  345.96   32.12
   3  -8  10  341.74   30.86
   3  -8  10  264.90   39.23
  -3   8 -11    9.26   29.91
  -3   8 -11   39.23   29.82
   3  -8  11    0.40   29.38
   3  -8  11   15.08   37.54
  -3   8 -12   13.28   25.48
  -3   8 -12   19.55   29.89
   3  -8  12  -23.94   29.15
   3  -8  12  -28.32   38.68
  -3   8 -13  125.12   27.80
  -3   8 -13  143.42   28.38
   3  -8  13  136.02   30.16
   3  -8  13  107.30   37.36
  -3   8 -14  171.03   28.17
  -3   8 -14  157.78   27.11
   3  -8  14  132.82   30.13
   3  -8  14  158.93   40.11
  -3   8 -15   49.65   27.77
   3  -8  15   31.21   29.00
   3  -8  15   11.35   34.37
  -3   8 -16   11.30   25.35
   3  -8  16   16.53   28.47
   3  -8  16   14.44   35.34
  -3   8 -17   49.47   22.42
   3  -8  17   49.87   26.42
   3  -8  17   78.96   33.66
  -3   8 -18   11.83   21.67
   3  -8  18   23.49   24.94
   3  -8  18   25.55   29.86
  -3   8 -19   34.54   23.56
  -3   8 -19   20.59   18.66
   3  -8  19   14.81   24.80
   3  -8  19   22.13   28.94
  -3   8 -20    7.56   23.12
   3  -8  20   40.86   26.54
   3  -8  20   24.58   24.05
   3  -8  20   39.12   26.29
   3  -7 -19   34.76   29.01
  -3   7  19  -17.22   35.50
  -3   7  19  -15.13   27.00
   3  -7 -18    0.65   31.07
  -3   7  18  -21.62   37.66
  -3   7  18   -9.05   29.57
   3  -7 -17    1.82   30.41
  -3   7  17    1.29   40.24
  -3   7  17  -11.40   33.08
   3  -7 -16    8.24   29.32
  -3   7  16    8.53   41.90
  -3   7  16  -29.91   33.62
   3  -7 -15    9.30   28.43
  -3   7  15   16.92   42.84
  -3   7  15   13.68   33.65
   3  -7 -14    2.76   29.49
  -3   7  14  -21.27   35.18
   3  -7 -13   77.61   29.76
  -3   7  13  103.75   38.86
   3  -7 -12  233.67   31.21
  -3   7  12  194.45   39.06
   3  -7 -11  149.35   30.43
   3  -7 -11   53.64   27.48
  -3   7  11  123.49   38.94
   3  -7 -10   25.15   28.74
  -3   7  10   51.11   37.81
   3  -7 -10   39.11   30.02
  -3   7  10   26.67   35.43
   3  -7  -9  227.59   29.25
   3  -7  -9  305.47   38.63
   3  -7  -9  234.57   30.38
  -3   7   9  245.34   36.41
   3  -7  -8    7.07   27.03
   3  -7  -8  -25.45   37.13
   3  -7  -8  -23.59   50.74
   3  -7  -7 1147.64   58.40
   3  -7  -7 1006.22   53.78
   3  -7  -7 1146.17   84.83
   3  -7  -6  163.98   25.10
   3  -7  -6  142.35   35.34
   3  -7  -6  147.68   51.27
   3  -7  -5   52.16   22.86
   3  -7  -5  110.68   33.92
   3  -7  -5   77.81   47.58
   3  -7  -4  917.13   53.57
   3  -7  -4  893.76   58.68
   3  -7  -4  690.63   68.85
  -3   7   3  413.19   37.95
  -3   7   3  425.62   34.13
   3  -7  -3  531.73   28.84
   3  -7  -3  543.91   35.45
  -3   7   3  406.84   35.25
   3  -7  -3  384.00   44.31
  -3   7   2  932.13   50.50
  -3   7   2  907.87   51.62
   3  -7  -2  910.84   32.31
  -3   7   2  905.19   44.05
   3  -7  -2  964.12   58.62
  -3   7   1  397.56   35.10
  -3   7   1  317.75   35.66
   3  -7  -1  360.52   25.96
   3  -7  -1  483.89   35.88
  -3   7   1  365.55   26.38
   3  -7  -1  397.44   35.07
   3  -7  -1  275.27   34.35
  -3   7   0   63.05   28.68
   3  -7   0   29.61   20.60
   3  -7   0   51.95   29.20
  -3   7   0   60.47   24.18
   3  -7   0   31.03   30.21
   3  -7   0    5.03   28.54
   3  -7   0    9.08   29.84
  -3   7  -1  741.33   48.83
   3  -7   1  771.57   52.54
   3  -7   1  878.47   42.97
  -3   7  -1  776.60   37.25
   3  -7   1  888.58   67.47
   3  -7   1  771.64   65.69
  -3   7  -2  213.21   31.18
   3  -7   2  201.76   27.74
   3  -7   2  221.23   30.79
  -3   7  -2  281.71   31.04
   3  -7   2  214.32   36.48
   3  -7   2  177.40   32.19
  -3   7  -3  210.89   31.88
   3  -7   3  179.34   27.64
   3  -7   3  199.31   29.77
  -3   7  -3  205.57   30.35
   3  -7   3  201.08   33.65
   3  -7   3  211.11   33.24
  -3   7  -4   -6.25   28.64
  -3   7  -4   15.92   25.24
   3  -7   4   -2.15   26.10
  -3   7  -4    7.30   29.84
   3  -7   4   51.86   34.59
   3  -7   4   10.22   27.26
  -3   7  -5   65.91   26.93
  -3   7  -5   57.86   24.56
   3  -7   5   81.38   25.40
  -3   7  -5   64.09   31.16
   3  -7   5   85.87   34.47
   3  -7   5   77.88   29.38
  -3   7  -6    6.07   30.94
  -3   7  -6   15.71   28.53
   3  -7   6  -24.46   32.85
   3  -7   6  -14.61   26.34
   3  -7   6  -29.77   34.93
  -3   7  -7  810.12   55.43
   3  -7   7  655.50   55.13
   3  -7   7  745.43   61.53
   3  -7   7  760.94   57.38
  -3   7  -8 1025.32   64.21
   3  -7   8  948.31   61.63
   3  -7   8  912.02   71.85
   3  -7   8 1064.58   68.71
  -3   7  -9  420.13   63.68
   3  -7   9  315.03   44.86
  -3   7  -9  381.80   54.04
   3  -7   9  412.63   45.26
   3  -7   9  364.55   67.06
  -3   7 -10 1506.82   70.48
  -3   7 -10 1524.61   70.39
   3  -7  10 1559.34   79.81
   3  -7  10 1862.33   96.69
  -3   7 -11    7.87   30.10
   3  -7  11   33.87   28.75
  -3   7 -12  177.16   28.65
  -3   7 -12  131.07   30.99
   3  -7  12  136.56   30.33
   3  -7  12  203.39   41.14
  -3   7 -13   14.86   29.19
   3  -7  13   18.15   30.11
   3  -7  13  -41.50   38.11
  -3   7 -14   -5.52   28.32
   3  -7  14   34.07   30.30
   3  -7  14   11.28   37.21
  -3   7 -14  -11.65   23.59
  -3   7 -15   73.61   27.21
   3  -7  15   89.34   30.25
   3  -7  15   93.62   37.00
  -3   7 -15   49.68   24.96
  -3   7 -16   26.76   25.75
  -3   7 -16  -15.31   26.49
   3  -7  16    0.07   29.07
   3  -7  16  -20.77   36.98
  -3   7 -16  -11.56   24.20
  -3   7 -17   60.67   24.11
  -3   7 -17   49.34   24.12
   3  -7  17   62.17   31.17
   3  -7  17   44.89   31.95
  -3   7 -17   40.26   25.74
  -3   7 -18   21.55   24.47
  -3   7 -18   30.28   20.45
   3  -7  18   18.41   29.33
   3  -7  18  -17.62   31.05
  -3   7 -18  -17.50   24.49
  -3   7 -19   -2.30   22.22
  -3   7 -19    0.29   19.10
   3  -7  19  -21.46   28.05
   3  -7  19   28.14   30.25
  -3   7 -19  -23.23   24.01
  -3   7 -20   11.09   22.48
   3  -7  20   42.66   27.89
   3  -7  20   -1.60   30.30
  -3   7 -21   11.68   22.05
   3  -7  21   50.08   33.72
   3  -7  21   16.40   27.90
  -3   7 -22    7.93   20.00
   3  -7  22   14.39   24.08
   3  -7  22   20.25   25.14
  -3   6  21   -0.53   31.05
  -3   6  21   16.43   26.57
  -3   6  20   -8.66   34.97
  -3   6  20    7.54   26.75
  -3   6  19   80.26   37.35
  -3   6  19   55.64   30.74
   3  -6 -18   12.32   28.31
  -3   6  18  -21.19   40.18
  -3   6  18  -15.21   34.10
   3  -6 -17   34.31   29.78
  -3   6  17   25.12   42.09
  -3   6  17    1.31   32.96
   3  -6 -16   53.42   29.85
  -3   6  16  101.34   45.08
  -3   6  16   76.02   35.09
   3  -6 -15   41.62   29.61
  -3   6  15   30.66   41.82
  -3   6  15   30.61   36.08
   3  -6 -14  483.47   39.91
  -3   6  14  543.62   48.79
   3  -6 -13   47.03   33.74
  -3   6  13    4.82   37.97
   3  -6 -12   84.23   29.81
  -3   6  12  125.73   38.11
   3  -6 -11   50.48   29.49
   3  -6 -11   45.44   40.52
  -3   6  11   55.62   37.25
   3  -6 -10  372.86   30.26
  -3   6  10  359.98   35.92
   3  -6 -10  316.13   34.93
   3  -6 -10  463.85   43.83
  -3   6  10  377.95   38.45
   3  -6  -9  405.67   29.17
   3  -6  -9  360.00   36.34
   3  -6  -9  496.41   45.51
  -3   6   9  421.12   42.76
   3  -6  -8 1302.25   75.13
   3  -6  -8 1563.76   91.99
   3  -6  -8 1474.96   87.82
   3  -6  -8 1379.75  102.27
  -3   6   7   -3.42   22.13
   3  -6  -7   36.92   25.36
   3  -6  -7   24.78   33.71
   3  -6  -7  114.64   29.37
   3  -6  -7   72.15   51.19
  -3   6   6  -19.25   24.84
   3  -6  -6   -4.53   22.48
   3  -6  -6   -5.42   32.53
  -3   6   5 1659.84   84.74
  -3   6   5 1784.45   94.47
   3  -6  -5 1808.13   79.55
   3  -6  -5 1818.31   87.09
   3  -6  -5 1752.49  111.65
  -3   6   4 2396.06  115.12
  -3   6   4 2391.35  115.96
   3  -6  -4 2391.30   99.41
   3  -6  -4 2799.07   80.49
   3  -6  -4 2258.01  124.13
  -3   6   3   36.86   23.28
   3  -6  -3   17.77   19.95
   3  -6  -3   44.20   29.63
  -3   6   3    7.20   22.42
   3  -6  -3    0.56   34.73
  -3   6   2  413.16   38.83
   3  -6  -2  408.40   25.76
   3  -6  -2  479.76   38.31
  -3   6   2  445.37   32.12
  -3   6   1   48.40   25.66
   3  -6  -1   28.15   22.37
   3  -6  -1   46.63   26.95
  -3   6   1   29.81   22.73
   3  -6  -1   14.73   27.53
  -3   6   0   65.47   26.58
   3  -6   0   48.43   22.93
   3  -6   0   49.39   26.53
  -3   6   0   43.88   22.86
   3  -6   0   51.03   27.26
  -3   6  -1   50.35   27.07
   3  -6   1   42.62   20.96
   3  -6   1   55.65   25.04
  -3   6  -1   49.30   24.48
   3  -6   1   23.58   27.02
  -3   6  -2  377.21   35.63
  -3   6  -2  369.58   35.91
   3  -6   2  369.80   43.31
   3  -6   2  413.50   35.73
  -3   6  -2  406.08   35.90
   3  -6   2  391.87   47.55
  -3   6  -3  749.85   57.11
  -3   6  -3  794.09   59.12
   3  -6   3  968.60   71.47
   3  -6   3  925.15   53.08
  -3   6  -3  929.35   46.86
   3  -6   3  905.47   70.25
   3  -6   3  748.34   60.63
   3  -6   3  645.40   55.49
  -3   6  -4   16.77   24.03
  -3   6  -4    2.12   30.80
   3  -6   4    1.51   24.08
   3  -6   4   -1.61   24.52
  -3   6  -4    6.35   27.94
   3  -6   4  -23.11   28.56
   3  -6   4    7.12   32.95
  -3   6  -5  171.22   25.50
  -3   6  -5  161.19   31.46
   3  -6   5  225.83   27.65
   3  -6   5  177.12   25.37
  -3   6  -5  216.80   31.68
   3  -6   5  225.57   26.96
   3  -6   5  232.45   34.89
  -3   6  -6  689.65   41.46
  -3   6  -6  677.36   50.65
  -3   6  -6  637.34   52.53
   3  -6   6  657.93   35.21
   3  -6   6  727.26   48.67
   3  -6   6  653.16   50.44
  -3   6  -7   36.99   25.72
  -3   6  -7   30.90   28.27
  -3   6  -7   24.69   27.84
   3  -6   7   25.32   28.70
   3  -6   7   45.56   26.02
   3  -6   7   68.88   34.74
  -3   6  -8  102.55   26.13
  -3   6  -8   87.09   25.26
  -3   6  -8   41.04   29.09
  -3   6  -8   55.97   28.81
   3  -6   8   49.06   26.63
   3  -6   8    6.68   32.10
  -3   6  -9  385.48   29.66
  -3   6  -9  353.46   32.35
  -3   6  -9  494.87   32.13
   3  -6   9  433.93   32.54
   3  -6   9  407.41   38.56
  -3   6  -9  304.28   32.14
  -3   6 -10   35.87   26.25
  -3   6 -10   16.83   28.93
   3  -6  10   15.85   28.29
   3  -6  10    5.54   38.14
  -3   6 -10   34.69   22.10
   3  -6  11  -40.74   29.35
   3  -6  11  -34.61   35.77
  -3   6 -11  -28.16   24.06
  -3   6 -12  285.36   30.12
   3  -6  12  300.39   30.20
   3  -6  12  336.32   38.14
  -3   6 -12  294.51   29.97
  -3   6 -13  883.72   37.69
   3  -6  13  943.31   47.52
   3  -6  13  919.99   40.85
  -3   6 -13  763.74   44.78
  -3   6 -14  -13.62   28.80
   3  -6  14    7.96   32.53
   3  -6  14    5.94   35.17
  -3   6 -14   10.05   25.72
  -3   6 -15   53.93   30.09
   3  -6  15   65.61   32.51
   3  -6  15   38.15   33.78
  -3   6 -15   34.60   24.83
  -3   6 -16   98.54   25.85
  -3   6 -16   94.82   26.80
   3  -6  16   98.00   32.89
   3  -6  16   84.41   32.82
  -3   6 -16   86.63   26.97
  -3   6 -17    4.57   24.27
  -3   6 -17   29.30   24.37
   3  -6  17    3.43   30.95
   3  -6  17   38.63   33.32
  -3   6 -17    9.99   26.19
  -3   6 -18   21.54   23.41
  -3   6 -18   -1.33   21.79
   3  -6  18    3.62   29.51
   3  -6  18  -25.66   29.82
  -3   6 -18   -6.46   27.57
  -3   6 -19   28.32   24.31
  -3   6 -19   15.07   19.68
   3  -6  19   22.11   28.31
   3  -6  19    4.83   30.83
  -3   6 -19   11.24   26.07
  -3   6 -20   -9.55   23.33
   3  -6  20   -0.69   27.65
   3  -6  20  -20.11   32.80
  -3   6 -20    4.23   23.68
  -3   6 -21   17.55   21.89
   3  -6  21   42.78   27.61
   3  -6  21   25.03   30.72
  -3   6 -21   27.81   24.82
  -3   6 -22   18.71   20.83
   3  -6  22   26.85   25.25
   3  -6  22   22.55   29.33
  -3   6 -22   24.48   23.72
  -3   6 -23   -1.14   19.38
   3  -6  23   12.30   24.82
   3  -6  23   -0.15   26.70
  -3   6 -23    7.28   22.02
   3  -5 -22   -7.55   30.37
  -3   5  22   -6.59   29.80
  -3   5  22   19.10   25.20
   3  -5 -21   -8.00   31.66
  -3   5  21  -18.96   33.82
  -3   5  21  -19.68   27.46
   3  -5 -20   43.40   33.14
  -3   5  20    1.84   38.56
  -3   5  20    6.42   29.41
  -3   5  19  -44.81   40.70
  -3   5  19  -37.86   32.65
  -3   5  18  -54.69   43.04
  -3   5  18  -11.14   32.86
  -3   5  17  -27.68   43.61
  -3   5  17   53.69   38.45
  -3   5  16   38.85   42.12
  -3   5  16   36.44   37.47
  -3   5  15  109.09   43.39
  -3   5  15  124.65   40.52
  -3   5  14   39.72   40.03
   3  -5 -14   12.97   25.52
   3  -5 -13   39.38   28.86
  -3   5  13   16.00   39.97
   3  -5 -13    9.23   24.84
   3  -5 -12    4.11   28.47
  -3   5  12   36.78   35.52
   3  -5 -11   14.45   27.29
  -3   5  11   42.37   37.21
   3  -5 -10  -13.87   26.57
  -3   5  10  -12.22   34.72
   3  -5 -10   -1.07   37.32
  -3   5  10   11.87   36.23
  -3   5   9  166.66   27.44
   3  -5  -9  167.13   25.93
  -3   5   9  208.58   34.91
   3  -5  -9  177.28   31.39
  -3   5   9  261.91   37.06
  -3   5   8  130.10   22.64
  -3   5   8  192.55   27.07
   3  -5  -8  193.90   23.97
   3  -5  -8  204.84   35.64
   3  -5  -8  190.55   27.92
   3  -5  -8  195.87   28.04
   3  -5  -8  199.51   48.07
  -3   5   7  190.26   24.95
  -3   5   7  234.99   28.13
   3  -5  -7  234.23   23.57
   3  -5  -7  235.23   33.82
   3  -5  -7  223.64   28.66
   3  -5  -7  202.28   49.50
  -3   5   6   85.63   22.30
  -3   5   6  110.19   28.38
   3  -5  -6  118.64   21.49
   3  -5  -6  123.21   31.41
   3  -5  -6  133.39   27.94
   3  -5  -6   73.85   47.10
  -3   5   5  141.97   23.98
   3  -5  -5  141.18   20.88
   3  -5  -5  152.70   30.28
   3  -5  -5  136.92   24.83
   3  -5  -5  130.76   42.76
  -3   5   4  443.98   34.17
   3  -5  -4  468.45   24.40
   3  -5  -4  641.00   44.37
   3  -5  -4  555.71   43.54
  -3   5   3   18.14   22.86
   3  -5  -3   13.54   21.95
   3  -5  -3    5.93   27.32
  -3   5   3   14.94   19.11
   3  -5  -3    1.58   26.01
  -3   5   2 1407.91   78.39
   3  -5  -2 1511.94   64.81
   3  -5  -2 1690.39   83.19
  -3   5   2 1377.62   65.71
   3  -5  -2 1567.41   94.68
  -3   5   1  403.34   38.90
   3  -5  -1  423.73   37.10
   3  -5  -1  443.39   30.29
  -3   5   1  391.07   26.61
   3  -5  -1  438.20   46.86
   3  -5  -1  453.07   38.69
  -3   5   0  339.31   32.93
  -3   5   0  237.89   34.86
   3  -5   0  338.39   38.61
   3  -5   0  359.77   31.35
  -3   5   0  334.12   25.60
   3  -5   0  361.39   36.90
  -3   5  -1   10.86   25.05
  -3   5  -1   49.25   32.33
   3  -5   1    4.12   24.97
   3  -5   1   12.60   26.43
  -3   5  -1   13.92   25.02
   3  -5   1    8.67   29.19
   3  -5   1   27.65   26.08
  -3   5  -2   21.92   24.75
  -3   5  -2   81.73   32.76
   3  -5   2   10.62   26.93
   3  -5   2   28.82   23.24
  -3   5  -2   40.35   25.52
   3  -5   2   21.11   26.00
   3  -5   2   10.31   27.46
  -3   5  -3  667.36   48.36
  -3   5  -3  730.32   68.96
  -3   5  -3  763.17   64.65
  -3   5  -3  883.04   53.02
   3  -5   3  708.12   59.60
   3  -5   3  610.02   55.09
  -3   5  -4  433.22   33.94
  -3   5  -4  439.03   43.47
  -3   5  -4  461.42   47.24
  -3   5  -4  523.80   42.53
   3  -5   4  400.50   31.43
   3  -5   4  359.22   35.98
  -3   5  -5 1686.90   77.80
  -3   5  -5 1832.40   94.05
  -3   5  -5 1561.23   93.45
   3  -5   5 1510.84   71.19
   3  -5   5 1850.39   94.31
  -3   5  -6  316.25   26.69
  -3   5  -6  359.11   36.87
  -3   5  -6  242.10   35.29
   3  -5   6  328.47   31.31
   3  -5   6  297.69   36.34
  -3   5  -6  253.68   33.21
  -3   5  -7   18.27   23.55
  -3   5  -7   18.56   30.65
  -3   5  -7  -25.21   29.40
   3  -5   7  -15.91   25.01
   3  -5   7  -33.17   31.02
  -3   5  -7    0.75   21.95
  -3   5  -8   37.47   29.23
  -3   5  -8   10.74   32.26
   3  -5   8  -34.35   25.70
   3  -5   8  -14.30   31.03
  -3   5  -8   -6.71   22.75
  -3   5  -9   89.95   30.76
  -3   5  -9   80.29   32.76
   3  -5   9   77.42   28.04
   3  -5   9   67.57   30.61
  -3   5  -9   48.22   23.27
  -3   5 -10  552.15   44.19
  -3   5 -10  427.33   49.59
   3  -5  10  636.17   42.37
   3  -5  10  571.94   39.15
  -3   5 -10  522.96   40.24
  -3   5 -11    3.85   25.01
  -3   5 -11  -34.36   31.72
  -3   5 -11   -7.31   26.97
   3  -5  11  -44.41   29.78
   3  -5  11  -33.81   29.82
  -3   5 -11  -11.57   22.13
   3  -5  12   83.99   36.47
  -3   5 -12   48.48   24.24
  -3   5 -12   10.77   29.69
  -3   5 -12   25.99   29.36
   3  -5  12   42.08   30.61
   3  -5  12   33.05   29.56
  -3   5 -12   54.01   23.86
   3  -5  13   -3.12   36.68
  -3   5 -13    9.10   29.91
  -3   5 -13   -0.01   27.57
   3  -5  13   19.49   32.45
   3  -5  13  -12.40   29.95
  -3   5 -13   -3.02   25.64
   3  -5  14  130.78   37.77
  -3   5 -14  118.47   32.57
  -3   5 -14   70.38   21.89
  -3   5 -14  117.06   29.63
   3  -5  14  153.30   33.82
   3  -5  14  112.05   31.62
  -3   5 -14  101.73   25.89
   3  -5  15   87.78   38.18
  -3   5 -15   47.44   30.64
  -3   5 -15   51.84   21.14
  -3   5 -15   83.49   27.99
   3  -5  15   83.22   33.37
   3  -5  15   47.39   28.94
  -3   5 -15   73.53   25.86
   3  -5  16   -0.56   37.90
  -3   5 -16  -51.42   31.31
  -3   5 -16    4.41   22.93
  -3   5 -16    4.77   25.58
   3  -5  16    1.15   33.40
   3  -5  16  -33.49   30.44
  -3   5 -16  -15.79   27.23
   3  -5  17   37.81   37.58
  -3   5 -17   -1.16   29.60
  -3   5 -17   15.78   23.09
  -3   5 -17  -14.43   25.10
   3  -5  17  -13.97   32.12
   3  -5  17   -5.33   27.73
  -3   5 -17  -17.50   25.48
   3  -5  18  -17.76   36.62
  -3   5 -18   -5.21   21.89
  -3   5 -18   -9.79   21.23
   3  -5  18   22.64   32.39
   3  -5  18  -31.07   28.80
  -3   5 -18  -13.78   27.03
  -3   5 -19    4.91   22.87
  -3   5 -19    6.77   22.05
   3  -5  19  -15.64   30.82
   3  -5  19  -33.49   28.91
  -3   5 -19   -0.49   24.92
  -3   5 -20  -25.15   22.61
  -3   5 -20  -16.14   22.93
   3  -5  20    0.99   28.54
   3  -5  20   -1.04   28.48
  -3   5 -20  -24.40   24.18
  -3   5 -21   -8.49   22.31
  -3   5 -21   12.26   22.68
   3  -5  21    4.37   27.57
   3  -5  21   12.38   30.46
  -3   5 -21  -25.43   25.10
  -3   5 -22   -2.41   19.31
  -3   5 -22   14.98   22.05
   3  -5  22  -12.29   26.17
   3  -5  22   29.81   29.98
  -3   5 -22  -12.61   24.96
  -3   5 -23   -5.82   19.08
  -3   5 -23    0.90   21.73
   3  -5  23   -2.59   26.78
   3  -5  23    2.72   30.40
  -3   5 -23    9.56   24.15
  -3   5 -24   30.55   17.24
   3  -5  24   40.85   26.36
  -3   5 -24   19.14   23.40
   3  -4 -22   -2.49   30.27
  -3   4  22  -12.24   32.20
  -3   4  22   17.80   29.40
   3  -4 -21   20.15   30.73
  -3   4  21   -8.14   36.94
  -3   4  21    8.25   30.05
   3  -4 -21   25.18   23.83
   3  -4 -20    9.14   31.73
  -3   4  20  -22.86   38.80
  -3   4  20  -32.07   33.93
   3  -4 -20   10.31   23.90
   3  -4 -19  -11.90   28.54
  -3   4  19   27.83   37.90
  -3   4  19   -3.13   35.68
   3  -4 -19   -2.74   24.84
   3  -4 -18   21.57   31.32
  -3   4  18  -28.88   40.30
  -3   4  18   30.05   35.29
   3  -4 -18   19.11   26.92
   3  -4 -17    3.06   29.42
  -3   4  17   55.08   45.82
  -3   4  17   39.19   37.84
   3  -4 -17   49.63   26.16
   3  -4 -16  889.14   52.18
  -3   4  16 1081.87   69.05
  -3   4  16  995.72   67.91
   3  -4 -15   26.45   29.14
  -3   4  15   17.87   38.85
  -3   4  15   28.37   40.72
   3  -4 -15   33.07   27.86
  -3   4  14  103.96   46.29
  -3   4  13    6.32   40.12
   3  -4 -13    8.96   27.56
  -3   4  12  -25.39   25.05
  -3   4  12    3.62   41.31
  -3   4  11   74.78   23.35
  -3   4  11  107.04   23.26
  -3   4  11  157.53   37.41
  -3   4  11  129.84   26.52
  -3   4  10  220.59   24.17
  -3   4  10  241.17   28.57
   3  -4 -10  363.17   39.27
  -3   4  10  256.28   32.63
  -3   4  10  235.28   25.33
  -3   4   9  273.10   26.95
  -3   4   9  345.41   30.16
  -3   4   9  348.97   34.26
   3  -4  -9  386.79   36.36
  -3   4   9  334.17   36.94
  -3   4   9  255.25   24.16
  -3   4   8   62.70   22.85
   3  -4  -8   41.10   21.01
  -3   4   8   75.40   33.10
  -3   4   8   87.68   33.98
   3  -4  -8   59.24   28.06
  -3   4   8   31.40   22.79
  -3   4   7  574.30   48.86
   3  -4  -7  676.53   38.47
   3  -4  -7  769.28   50.10
  -3   4   7  476.17   44.97
   3  -4  -7  821.68   53.48
   3  -4  -7  697.20   62.13
  -3   4   7  519.42   30.83
  -3   4   6   -9.38   22.49
   3  -4  -6   -1.34   18.97
   3  -4  -6   33.39   32.05
   3  -4  -6   12.20   24.99
  -3   4   6   12.96   19.87
  -3   4   5  566.76   47.29
   3  -4  -5  563.57   32.68
   3  -4  -5  678.18   51.62
   3  -4  -5  602.26   40.66
   3  -4  -4  -18.49   20.36
   3  -4  -4  -68.23   31.18
   3  -4  -4  -30.33   25.94
  -3   4   3  463.18   41.23
   3  -4  -3  386.77   27.17
   3  -4  -3  415.15   36.41
   3  -4  -3  600.23   41.77
  -3   4   2   61.93   36.28
   3  -4  -2   97.08   26.14
   3  -4  -2   49.74   29.02
   3  -4  -2   69.20   29.83
   3  -4  -2   36.20   29.65
  -3   4   1  273.12   48.16
  -3   4   0  199.59   49.15
  -3   4  -1 3145.74  159.40
  -3   4  -2 1768.19  118.92
  -3   4  -3 1651.85   98.88
  -3   4  -4  103.90   23.14
  -3   4  -4  130.62   39.65
   3  -4   4   81.96   30.28
  -3   4  -4   11.20   38.19
  -3   4  -5  493.64   30.00
  -3   4  -5  588.13   52.80
   3  -4   5  446.98   33.48
   3  -4   5  386.36   41.84
  -3   4  -5  488.96   64.88
  -3   4  -6 2144.20  124.16
  -3   4  -6 2583.74   92.93
   3  -4   6 2574.44  107.18
   3  -4   6 2112.59   96.10
  -3   4  -6 2627.58  135.42
  -3   4  -7 3049.41  127.10
  -3   4  -7 3347.92  157.52
   3  -4   7 3083.28  123.46
   3  -4   7 3142.77  132.45
  -3   4  -7 3259.66  137.87
  -3   4  -7 3206.45  141.05
  -3   4  -8   15.07   33.51
  -3   4  -8  -17.73   31.18
   3  -4   8   -3.07   25.34
   3  -4   8    5.64   27.74
  -3   4  -8    9.81   21.85
  -3   4  -8  -14.04   24.92
   3  -4   9  260.77   36.60
  -3   4  -9  278.74   32.22
  -3   4  -9  175.38   29.34
   3  -4   9  242.62   28.16
   3  -4   9  194.26   25.67
  -3   4  -9  225.25   24.73
  -3   4  -9  223.67   25.26
   3  -4  10  579.03   48.29
  -3   4 -10  625.19   46.64
  -3   4 -10  466.38   43.60
   3  -4  10  556.83   43.27
   3  -4  10  497.17   30.85
  -3   4 -10  590.66   40.50
  -3   4 -10  538.80   37.17
   3  -4  11  568.18   42.18
  -3   4 -11  559.63   39.98
  -3   4 -11  505.28   47.15
  -3   4 -11  474.69   39.02
  -3   4 -11  648.17   35.32
   3  -4  11  713.19   42.47
   3  -4  11  541.62   35.25
  -3   4 -11  635.53   42.86
  -3   4 -11  582.46   36.98
   3  -4  12   38.44   35.77
  -3   4 -12   69.60   24.23
  -3   4 -12   36.78   30.68
  -3   4 -12   47.02   19.55
  -3   4 -12   47.42   27.08
   3  -4  12   76.71   30.54
   3  -4  12   42.71   23.94
  -3   4 -12   50.27   23.79
  -3   4 -12   29.88   19.61
   3  -4  13  -14.16   35.83
  -3   4 -13   24.35   23.85
  -3   4 -13  -13.06   30.81
  -3   4 -13   -0.10   19.67
  -3   4 -13   -9.53   24.98
   3  -4  13  -21.27   31.45
   3  -4  13   -7.24   24.20
  -3   4 -13  -10.08   26.16
  -3   4 -13   -3.52   18.19
   3  -4  14  -12.75   37.21
  -3   4 -14  -27.55   29.31
  -3   4 -14    3.94   20.96
  -3   4 -14  -15.91   31.03
   3  -4  14   -5.08   31.21
   3  -4  14    5.03   25.91
  -3   4 -14  -10.92   24.90
  -3   4 -14   16.37   18.18
   3  -4  15   42.43   38.41
  -3   4 -15  -11.44   30.51
  -3   4 -15   28.92   20.76
  -3   4 -15   51.45   25.27
   3  -4  15   56.78   32.47
   3  -4  15   32.73   25.93
  -3   4 -15   48.99   26.13
   3  -4  16  -26.84   38.89
  -3   4 -16    0.56   33.25
  -3   4 -16    9.30   22.98
  -3   4 -16    3.11   25.47
   3  -4  16  -12.91   28.84
   3  -4  16  -18.98   24.34
  -3   4 -16   25.45   26.07
   3  -4  17  -41.56   39.52
  -3   4 -17    1.98   33.31
  -3   4 -17   -2.03   23.76
   3  -4  17    4.22   25.81
  -3   4 -17   14.86   26.75
   3  -4  18    5.71   40.15
  -3   4 -18  -41.10   32.45
  -3   4 -18  -12.72   24.71
   3  -4  18  -31.26   25.61
  -3   4 -18  -43.26   26.47
   3  -4  19  -30.60   42.26
  -3   4 -19  -29.12   32.84
  -3   4 -19   -5.74   25.42
   3  -4  19  -43.76   26.33
  -3   4 -19  -21.81   25.41
  -3   4 -20   54.98   32.25
  -3   4 -20    9.71   25.28
   3  -4  20    5.65   26.45
  -3   4 -20   51.31   26.82
  -3   4 -21  -23.85   22.14
  -3   4 -21    1.86   30.34
  -3   4 -21   -3.84   25.25
   3  -4  21   -6.37   27.20
  -3   4 -21   -3.20   26.95
  -3   4 -22   55.52   21.57
  -3   4 -22   77.62   24.89
   3  -4  22   50.52   29.21
  -3   4 -22   64.71   24.16
  -3   4 -23   11.28   18.58
  -3   4 -23    4.84   25.15
   3  -4  23   -4.71   29.90
  -3   4 -23    9.78   24.48
  -3   4 -24   54.88   16.34
  -3   4 -24   69.22   23.19
  -3   4 -24   67.40   23.30
  -3   4 -25  156.35   23.32
  -3   4 -25  169.16   24.91
   3  -3 -23   -4.51   30.53
  -3   3  23   11.84   28.31
  -3   3  23    5.98   28.34
   3  -3 -23   26.77   23.14
   3  -3 -22    9.22   31.88
  -3   3  22   18.30   34.06
  -3   3  22   15.81   33.36
   3  -3 -22   -1.01   24.98
   3  -3 -21    0.83   30.09
  -3   3  21   15.36   34.96
  -3   3  21  -12.80   32.80
   3  -3 -21    4.56   25.69
   3  -3 -20   -7.17   29.64
  -3   3  20  -12.05   38.63
  -3   3  20  -24.72   33.63
   3  -3 -20   28.03   27.32
   3  -3 -19   56.76   31.78
  -3   3  19   52.30   41.00
  -3   3  19   54.93   34.90
   3  -3 -19   48.03   26.80
   3  -3 -18  -35.82   29.16
  -3   3  18  -38.16   40.11
  -3   3  18  -33.21   37.55
   3  -3 -18   14.22   27.61
   3  -3 -17   57.05   30.25
  -3   3  17   76.41   42.80
  -3   3  17  105.01   39.33
   3  -3 -17   99.21   26.83
   3  -3 -16    0.96   29.13
  -3   3  16   19.75   39.15
  -3   3  16   73.46   36.47
   3  -3 -16   60.50   27.94
  -3   3  15  -39.28   31.27
   3  -3 -15    3.99   28.59
  -3   3  15  -23.77   41.14
  -3   3  15   15.73   37.91
   3  -3 -15   87.27   29.38
  -3   3  14  -19.54   31.19
   3  -3 -14   18.33   27.62
  -3   3  14   54.17   37.82
  -3   3  14   57.91   38.84
   3  -3 -14   26.42   27.17
  -3   3  13  -17.27   27.18
   3  -3 -13  -19.52   26.60
  -3   3  13   24.29   37.40
   3  -3 -13   -1.24   29.19
  -3   3  12    3.89   27.61
  -3   3  12   17.40   24.60
   3  -3 -12    4.75   23.09
  -3   3  12  103.05   36.43
  -3   3  12   61.30   31.61
  -3   3  11   -3.53   24.95
  -3   3  11   15.73   25.35
   3  -3 -11    2.74   21.57
  -3   3  11   13.82   28.19
  -3   3  10  143.97   26.59
   3  -3 -10  171.54   23.35
  -3   3  10  170.48   26.26
  -3   3   9   14.64   23.24
   3  -3  -9   39.51   20.39
  -3   3   9   68.15   33.66
  -3   3   9   28.55   34.48
   3  -3  -9   12.12   28.73
  -3   3   9    3.71   23.03
  -3   3   8   37.50   23.76
  -3   3   8   59.59   32.11
  -3   3   8   38.35   35.83
   3  -3  -8   51.22   28.07
  -3   3   8   25.51   24.19
  -3   3   7   30.14   25.74
  -3   3   7   17.09   27.04
  -3   3   7   -8.12   36.81
   3  -3  -7   10.69   25.13
  -3   3   7   20.27   23.86
   3  -3  -6   64.45   33.13
   3  -3  -6   33.13   22.39
  -3   3   5  -68.98   34.44
   3  -3  -5  -47.33   31.42
   3  -3  -5  -43.65   42.14
   3  -3  -5  -21.77   24.50
  -3   3   4 1967.61  114.77
   3  -3  -4 1735.63   98.75
  -3   3   3  284.95   42.46
   3  -3  -3   75.42   33.76
  -3   3   2  168.49   46.27
   3  -3  -2   56.00   32.37
  -3   3   1   10.54   41.47
   3  -3  -1   28.99   29.27
  -3   3   0   40.14   40.57
   3  -3   0  -15.35   30.87
   3  -3   0  -11.91   28.02
  -3   3  -1   34.46   30.55
  -3   3  -1   82.58   43.46
   3  -3   1   43.07   29.92
  -3   3  -2  113.26   28.91
  -3   3  -2  106.00   45.59
  -3   3  -3  -17.37   28.18
  -3   3  -3   54.13   43.01
  -3   3  -3 -105.64   41.43
  -3   3  -4 2141.73  132.61
  -3   3  -4 1973.62  118.87
  -3   3  -4 1860.23   96.94
  -3   3  -4 2188.62  147.71
  -3   3  -5  554.63   46.54
  -3   3  -5  697.84   60.95
  -3   3  -6 1143.43   72.84
  -3   3  -6 1120.53   78.54
  -3   3  -7 1230.57   76.08
  -3   3  -7 1413.97   79.81
   3  -3   8  133.14   32.87
  -3   3  -8  213.44   37.77
  -3   3  -8  162.54   28.01
  -3   3  -8  136.71   26.04
  -3   3  -8  191.67   32.56
   3  -3   9   57.75   31.73
  -3   3  -9   31.09   29.12
  -3   3  -9   61.56   26.55
   3  -3   9   36.11   22.47
  -3   3  -9   33.04   22.20
  -3   3  -9  -17.66   27.77
   3  -3  10  710.41   54.82
   3  -3  10  893.34   60.98
  -3   3 -10  676.65   58.49
  -3   3 -10  623.16   36.99
  -3   3 -10  671.74   47.58
   3  -3  10  629.85   33.56
  -3   3 -10  826.18   51.49
  -3   3 -10  757.71   51.68
   3  -3  11 1685.79   88.67
   3  -3  11 1879.97   88.22
  -3   3 -11 1621.83   85.77
  -3   3 -11 1509.05   67.95
  -3   3 -11 1592.78   76.28
   3  -3  11 1510.23   65.87
  -3   3 -11 1693.03   74.96
   3  -3  12  671.55   50.72
   3  -3  12  654.52   38.68
  -3   3 -12  588.10   41.80
  -3   3 -12  561.57   33.84
  -3   3 -12  633.00   42.01
   3  -3  12  529.77   32.56
  -3   3 -12  601.57   34.20
   3  -3  13  361.58   36.17
   3  -3  13  390.10   29.21
  -3   3 -13  359.85   35.57
  -3   3 -13  354.82   23.59
  -3   3 -13  319.38   28.86
   3  -3  13  300.66   22.30
  -3   3 -13  409.09   29.02
  -3   3 -13  350.15   22.59
   3  -3  14  507.57   42.27
   3  -3  14  482.22   35.68
  -3   3 -14  486.38   38.74
  -3   3 -14  520.69   31.39
  -3   3 -14  402.27   41.91
   3  -3  14  402.65   28.19
  -3   3 -14  528.19   33.34
  -3   3 -14  394.82   27.05
   3  -3  15    4.19   39.34
   3  -3  15    1.81   19.93
  -3   3 -15    7.70   29.16
  -3   3 -15   -1.01   22.26
   3  -3  15  -10.90   20.82
  -3   3 -15  -18.59   25.10
  -3   3 -15   25.69   17.47
   3  -3  16   -1.64   37.70
  -3   3 -16    7.43   32.35
  -3   3 -16    7.97   23.28
   3  -3  16   11.88   20.78
  -3   3 -16    9.77   25.49
   3  -3  17  -17.13   38.88
  -3   3 -17  -22.54   30.67
  -3   3 -17    2.86   23.74
   3  -3  17  -11.58   20.84
  -3   3 -17  -12.94   24.05
   3  -3  18  -46.38   39.62
  -3   3 -18    5.14   31.49
  -3   3 -18  -26.16   25.57
   3  -3  18  -11.26   22.69
  -3   3 -18  -39.26   26.82
   3  -3  19    7.07   39.64
  -3   3 -19  -19.93   32.75
  -3   3 -19   47.18   29.14
   3  -3  19   -8.08   23.58
  -3   3 -19    7.28   28.93
   3  -3  20    3.22   40.58
  -3   3 -20    7.52   33.27
  -3   3 -20   40.44   26.86
   3  -3  20    0.11   24.45
  -3   3 -20   18.84   24.45
  -3   3 -21   -7.09   23.32
  -3   3 -21  -14.90   31.74
  -3   3 -21  -17.31   26.38
   3  -3  21    8.17   31.92
   3  -3  21  -13.07   24.67
  -3   3 -21   -6.50   28.86
  -3   3 -22   59.51   19.92
  -3   3 -22   18.78   32.51
  -3   3 -22   98.29   28.73
   3  -3  22  125.81   33.44
   3  -3  22   91.95   27.80
  -3   3 -22   89.22   27.85
  -3   3 -23  428.01   38.18
  -3   3 -23  567.12   34.87
   3  -3  23  510.64   38.69
  -3   3 -23  570.02   31.84
  -3   3 -24   67.76   28.33
  -3   3 -24   82.24   25.09
   3  -3  24  155.19   36.08
  -3   3 -24  121.05   25.68
  -3   3 -25    3.36   23.99
   3  -3  25   11.67   30.73
  -3   3 -25   18.58   24.96
  -3   3 -26    5.97   21.90
   3  -3  26   35.85   30.91
  -3   3 -26   12.87   21.68
   3  -2 -23   19.29   29.26
  -3   2  23   23.24   29.84
  -3   2  23   -2.89   31.08
   3  -2 -23   19.51   25.57
   3  -2 -22  -10.68   30.45
  -3   2  22  -28.76   33.04
   3  -2 -22    3.06   24.53
  -3   2  22   17.03   32.70
   3  -2 -22   35.12   27.02
   3  -2 -21    6.50   31.19
  -3   2  21   -6.38   34.50
  -3   2  21  -32.08   35.78
   3  -2 -21   30.59   26.43
   3  -2 -20    4.60   31.44
  -3   2  20    5.90   37.57
  -3   2  20   13.70   36.84
   3  -2 -20   12.16   27.29
   3  -2 -19  -14.03   28.23
  -3   2  19   45.41   36.85
  -3   2  19    0.18   38.31
   3  -2 -19    7.27   25.81
  -3   2  18   29.95   26.39
   3  -2 -18   73.60   28.95
  -3   2  18  111.45   39.26
  -3   2  18  131.26   37.39
   3  -2 -18  124.96   28.17
  -3   2  17  -18.61   30.08
   3  -2 -17  -41.47   28.83
  -3   2  17  -16.17   40.82
  -3   2  17  -81.40   40.70
   3  -2 -17    2.12   31.17
  -3   2  16   -1.39   30.35
   3  -2 -16  -42.55   28.23
  -3   2  16  -33.02   40.80
  -3   2  16  -14.57   37.59
   3  -2 -16  -25.84   28.76
  -3   2  15   37.23   33.67
   3  -2 -15   60.78   27.20
  -3   2  15   71.11   40.59
  -3   2  15   89.33   37.29
   3  -2 -15   29.92   28.21
  -3   2  14   44.29   31.08
   3  -2 -14   68.70   26.72
  -3   2  14  179.44   40.09
  -3   2  14  125.16   36.52
   3  -2 -14  118.53   29.05
  -3   2  13    6.96   30.75
  -3   2  13    7.92   20.21
   3  -2 -13    0.39   25.71
  -3   2  12  107.62   29.36
   3  -2 -12   75.91   24.76
  -3   2  12   96.12   33.12
  -3   2  11   -5.28   26.32
   3  -2 -11  -28.39   21.74
  -3   2  11  -29.01   29.57
  -3   2  10   16.22   23.24
   3  -2 -10    8.71   20.47
  -3   2  10   27.68   29.42
  -3   2   9   56.83   24.04
   3  -2  -9   42.52   18.99
  -3   2   9   69.91   30.11
  -3   2   9   24.98   32.43
  -3   2   9   62.60   25.87
  -3   2   8  138.15   25.45
  -3   2   8  133.28   27.67
   3  -2  -8  116.85   18.43
  -3   2   8  179.37   29.63
  -3   2   8  109.56   37.96
   3  -2  -8  153.79   27.36
  -3   2   8  158.08   27.07
  -3   2   8  130.73   29.60
  -3   2   7 1612.34   79.12
  -3   2   7 2189.57   97.52
   3  -2  -7 1758.47   71.62
  -3   2   7 2057.99   98.07
  -3   2   7 1829.66  123.99
  -3   2   7 2146.37   99.91
  -3   2   7 1991.27   86.37
  -3   2   6  434.28   38.13
  -3   2   6  464.18   50.12
  -3   2   5 1980.53  110.43
  -3   2   5 1578.62  114.88
  -3   2   4   34.70   38.66
  -3   2   3  530.64   40.98
   3  -2  -3  423.49   33.51
   3  -2  -3  543.24   45.04
  -3   2   2   36.06   41.00
   3  -2  -2  -14.05   31.54
   3  -2  -2   -9.72   32.65
  -3   2   1   51.86   42.06
   3  -2  -1  -42.56   35.65
   3  -2  -1  -21.19   32.98
  -3   2   0  285.10   45.88
   3  -2   0  182.70   44.32
   3  -2   0  204.19   42.20
  -3   2  -1 2888.67  149.08
   3  -2   1 2951.98  156.89
   3  -2   1 2848.95  162.91
  -3   2  -2  283.63   35.32
  -3   2  -2  410.98   46.37
  -3   2  -2  254.19   89.02
  -3   2  -2  289.84   47.91
   3  -2   2  263.63   48.29
  -3   2  -3  365.82   38.98
  -3   2  -3  485.35   50.09
  -3   2  -3  341.91   55.70
  -3   2  -3  356.54   49.67
   3  -2   3  319.03   42.98
  -3   2  -4 1410.99   81.57
  -3   2  -4 1542.74   95.43
  -3   2  -4 1569.09   91.66
  -3   2  -4 1565.58   94.46
   3  -2   4 1500.33   99.84
  -3   2  -5  779.32   62.00
  -3   2  -5  894.29   67.95
  -3   2  -5  746.92  109.35
  -3   2  -5  846.57   69.72
  -3   2  -6   34.06   28.50
  -3   2  -6   55.56   41.89
  -3   2  -6   -5.01   35.28
  -3   2  -6   15.44   40.27
  -3   2  -7  199.07   53.29
  -3   2  -7  292.83   42.16
  -3   2  -7  367.54   36.91
   3  -2   8   -8.69   36.13
  -3   2  -8   21.79   26.41
  -3   2  -8 -128.89   37.95
   3  -2   9   38.02   36.12
  -3   2  -9   27.33   26.00
  -3   2  -9  -48.84   29.35
   3  -2  10   -0.43   33.86
   3  -2  10  -21.82   30.65
  -3   2 -10    8.74   24.72
  -3   2 -10   -6.40   21.33
  -3   2 -10  -12.34   23.17
  -3   2 -10    5.82   28.80
   3  -2  11  -14.16   33.12
   3  -2  11  -30.21   25.36
  -3   2 -11  -12.64   26.52
   3  -2  11   -4.81   18.91
  -3   2 -11  -16.30   21.89
  -3   2 -11  -16.26   24.74
   3  -2  12  -17.86   32.45
   3  -2  12   -2.98   23.63
  -3   2 -12   16.19   26.78
  -3   2 -12   -8.67   23.00
   3  -2  12  -11.33   17.97
  -3   2 -12    6.74   22.03
  -3   2 -12   -6.32   22.84
   3  -2  13  -18.97   33.34
   3  -2  13   -4.75   21.93
  -3   2 -13   -6.24   27.93
   3  -2  13  -32.78   19.73
  -3   2 -13  -22.61   22.72
  -3   2 -13  -13.76   19.90
   3  -2  14   16.12   35.69
   3  -2  14   10.75   20.65
  -3   2 -14   15.80   26.81
   3  -2  14   15.17   19.46
  -3   2 -14   44.97   21.17
  -3   2 -14   44.89   19.80
   3  -2  15  186.71   35.38
   3  -2  15  175.93   21.25
  -3   2 -15  215.80   32.14
   3  -2  15  133.08   19.41
  -3   2 -15  139.75   19.89
   3  -2  16  -26.37   34.77
  -3   2 -16  -59.54   28.26
  -3   2 -16    2.03   26.79
   3  -2  16  -32.46   20.09
   3  -2  17    8.78   39.25
  -3   2 -17   -7.37   31.77
  -3   2 -17    4.27   26.82
   3  -2  17   11.53   20.33
   3  -2  18   19.00   37.01
  -3   2 -18    7.66   29.75
  -3   2 -18   20.63   27.94
   3  -2  18  -11.09   21.39
   3  -2  19  -24.50   41.91
  -3   2 -19   14.49   29.44
  -3   2 -19   21.22   29.59
   3  -2  19   12.59   22.27
   3  -2  20   72.43   39.63
  -3   2 -20   76.22   29.38
  -3   2 -20  177.08   30.02
   3  -2  20   84.92   23.41
  -3   2 -21   15.21   20.27
  -3   2 -21  -23.10   31.33
  -3   2 -21    2.33   28.00
   3  -2  21   19.75   24.58
  -3   2 -22    2.49   30.87
  -3   2 -22   11.29   28.25
   3  -2  22   11.90   33.63
   3  -2  22    2.11   25.31
  -3   2 -23  110.81   29.70
  -3   2 -23  200.85   30.79
   3  -2  23  186.03   34.74
  -3   2 -24   35.54   30.37
  -3   2 -24   73.10   27.55
   3  -2  24   73.13   33.14
  -3   2 -25  -11.65   27.90
  -3   2 -25   -0.80   26.60
   3  -2  25  -22.13   32.38
  -3   2 -26   27.71   23.82
   3  -2  26   13.05   30.56
  -3   1  24   29.14   26.69
   3  -1 -24   63.26   24.07
  -3   1  24   31.65   28.60
   3  -1 -24   36.29   25.58
  -3   1  23   29.64   29.55
   3  -1 -23    8.45   25.42
  -3   1  23   10.74   32.88
   3  -1 -23   34.78   26.40
   3  -1 -22   -3.52   27.74
  -3   1  22   -7.16   32.58
  -3   1  22  -12.60   37.10
   3  -1 -22   24.44   28.59
   3  -1 -21    3.20   29.31
  -3   1  21    1.08   33.78
  -3   1  21   18.00   36.52
   3  -1 -21   27.92   25.37
  -3   1  20   -1.32   24.90
   3  -1 -20    1.54   29.63
  -3   1  20   12.03   35.59
  -3   1  20   20.21   34.50
   3  -1 -20   18.33   28.13
  -3   1  19   17.05   28.15
   3  -1 -19  -24.76   29.16
  -3   1  19   -5.18   34.80
  -3   1  19   -9.43   35.58
   3  -1 -19   18.11   26.72
  -3   1  18    6.06   31.25
   3  -1 -18   71.07   27.93
  -3   1  18   94.93   38.66
  -3   1  18   57.64   35.83
   3  -1 -18  110.23   29.26
  -3   1  17  146.85   34.79
   3  -1 -17  173.44   29.62
  -3   1  17  233.22   40.25
  -3   1  17  276.50   37.45
   3  -1 -17  204.07   29.13
  -3   1  16    9.00   33.86
   3  -1 -16   67.91   29.42
  -3   1  16   12.87   39.34
   3  -1 -16   66.42   29.43
  -3   1  15  131.28   37.61
   3  -1 -15  119.00   26.17
  -3   1  15  179.27   39.95
   3  -1 -15  161.02   29.80
  -3   1  14   45.52   33.30
   3  -1 -14   35.49   25.05
  -3   1  14   72.28   37.78
  -3   1  13   -3.55   31.02
   3  -1 -13   -4.94   23.58
  -3   1  13   76.21   32.89
  -3   1  12  144.52   32.03
   3  -1 -12  139.46   22.99
  -3   1  12  245.92   44.42
  -3   1  11  317.13   30.47
   3  -1 -11  285.09   24.38
  -3   1  11  418.61   36.28
  -3   1  10   81.47   24.21
  -3   1  10  144.55   28.12
   3  -1 -10   93.40   21.64
  -3   1  10  152.67   27.86
  -3   1  10  147.25   31.93
  -3   1   9   24.11   24.60
  -3   1   9    7.47   26.82
   3  -1  -9   29.95   19.67
  -3   1   9   49.59   29.21
  -3   1   9   19.22   28.24
  -3   1   9   25.04   25.82
  -3   1   9   37.29   27.47
  -3   1   8   50.38   23.01
  -3   1   8   36.99   29.34
   3  -1  -8   51.74   17.82
  -3   1   8   75.95   34.79
  -3   1   8   75.06   29.26
  -3   1   8  114.07   35.89
  -3   1   7  593.83   48.28
  -3   1   7  617.52   50.23
  -3   1   7  521.43   56.66
  -3   1   7  655.30   50.86
  -3   1   6 2824.15  135.13
  -3   1   6 2304.83  132.87
  -3   1   5  -68.60   35.92
  -3   1   4  145.81   37.82
   3  -1  -4  131.85   28.39
  -3   1   4  143.69   51.80
  -3   1   3  101.24   37.61
   3  -1  -3   69.81   30.67
  -3   1   2  343.68   42.43
   3  -1  -2  206.50   40.72
   3  -1  -2  199.73   43.37
  -3   1   1  730.50   57.71
   3  -1  -1  566.09   45.95
   3  -1  -1  635.69   63.52
  -3   1   0 1594.04  107.07
   3  -1   0 1536.88  100.43
  -3   1   0 1600.84  103.65
   3  -1   0 1427.32  100.10
  -3   1  -1 8341.75  239.74
   3  -1   1 8912.01  249.71
  -3   1  -1 9564.54  135.31
   3  -1   1 8580.57  237.85
  -3   1  -2 3949.15  190.75
  -3   1  -2 4122.99  165.78
  -3   1  -2 3876.84  213.68
   3  -1   2 3640.22  194.94
  -3   1  -3  837.50   68.39
  -3   1  -3 1022.04   76.76
  -3   1  -3  955.57   57.77
  -3   1  -3  949.07   75.08
   3  -1   3  898.46   80.35
  -3   1  -4 1078.01   71.24
  -3   1  -4 1246.80   82.15
  -3   1  -4 1154.15   67.83
  -3   1  -4 1165.80   85.55
   3  -1   4 1185.11   91.64
  -3   1  -5  659.53   53.68
  -3   1  -5  755.34   61.05
  -3   1  -5  684.07   60.63
  -3   1  -5  673.10   66.12
   3  -1   5  683.75   64.89
  -3   1  -6 3293.46  144.31
  -3   1  -6 3441.44  155.42
  -3   1  -6 3636.32  160.08
  -3   1  -6 3929.90  199.04
   3  -1   7  -23.62   38.03
  -3   1  -7   -9.26   30.72
  -3   1  -7  -35.53   40.40
  -3   1  -7  -11.18   40.16
   3  -1   8  126.34   38.05
  -3   1  -8   26.36   29.91
  -3   1  -8  195.22   48.54
   3  -1   9  121.31   35.80
  -3   1  -9  126.45   29.24
  -3   1  -9  -12.08   40.89
   3  -1  10  951.72   43.47
  -3   1 -10  839.71   60.98
  -3   1 -10  804.01   53.72
  -3   1 -10  858.78   57.49
  -3   1 -10 1014.18   61.69
  -3   1 -10  809.70   62.28
   3  -1  11 1012.40   68.79
  -3   1 -11  880.02   57.69
  -3   1 -11  926.98   61.34
   3  -1  12 2993.14  156.01
   3  -1  12 3960.97  139.74
  -3   1 -12 3866.61  135.15
  -3   1 -12 3401.40  121.91
  -3   1 -12 3634.66  130.68
   3  -1  13   91.15   31.36
   3  -1  13  142.79   23.69
  -3   1 -13  136.27   25.66
   3  -1  13  112.46   21.42
  -3   1 -13  164.76   22.22
  -3   1 -13  163.35   24.94
   3  -1  14  129.35   36.24
   3  -1  14  110.91   21.18
  -3   1 -14  141.10   26.77
   3  -1  14  106.71   19.77
  -3   1 -14  171.74   23.39
  -3   1 -14  157.64   22.42
   3  -1  15   32.92   32.78
   3  -1  15   49.90   20.84
  -3   1 -15   45.35   26.70
   3  -1  15   17.16   18.40
  -3   1 -15   52.46   23.81
  -3   1 -15   45.39   21.14
   3  -1  16    2.07   33.22
  -3   1 -16    4.40   27.12
  -3   1 -16    6.61   26.67
   3  -1  16   -5.04   20.30
  -3   1 -16   31.07   22.28
  -3   1 -16    0.53   20.23
   3  -1  17  -41.25   33.65
  -3   1 -17    6.34   27.16
  -3   1 -17    4.06   27.84
   3  -1  17  -32.65   19.75
  -3   1 -17  -25.69   26.20
   3  -1  18   52.57   34.11
  -3   1 -18   44.50   30.53
  -3   1 -18   71.28   29.71
   3  -1  18   46.74   22.41
  -3   1 -18   45.18   24.66
  -3   1 -19   16.82   29.43
  -3   1 -19   29.54   30.65
   3  -1  19  -19.46   22.74
  -3   1 -19    2.53   27.51
  -3   1 -20   51.41   29.18
  -3   1 -20   98.68   30.94
   3  -1  20   69.50   23.83
  -3   1 -20   80.52   26.02
  -3   1 -21  366.73   35.13
  -3   1 -21  541.70   42.64
  -3   1 -21  512.99   40.03
  -3   1 -22  219.21   31.08
  -3   1 -22  251.39   30.42
  -3   1 -23   20.63   29.65
   3  -1  23   60.37   38.05
  -3   1 -23   43.13   27.51
  -3   1 -24   10.03   27.55
   3  -1  24  -20.88   36.66
  -3   1 -24    2.42   25.95
  -3   1 -25   64.30   29.70
   3  -1  25   78.82   34.14
  -3   1 -25   57.68   23.97
  -3   1 -26   21.91   28.30
   3  -1  26   44.44   32.82
  -3   1 -26   42.41   20.96
  -3   0  24    1.91   26.54
   3   0 -24    0.53   25.11
  -3   0  24  -20.65   27.56
   3   0 -24   10.49   27.60
  -3   0  23   26.14   27.92
  -3   0  23   56.20   30.53
   3   0 -23   27.71   28.50
  -3   0  22   -8.31   27.88
  -3   0  22   -3.25   28.17
  -3   0  22  -13.21   33.21
   3   0 -22   16.19   28.15
   3   0 -21  -28.04   25.75
  -3   0  21  -16.89   31.84
  -3   0  21   28.37   35.18
   3   0 -21    1.17   26.98
  -3   0  20    1.46   26.76
   3   0 -20    5.74   26.81
  -3   0  20    4.37   33.66
  -3   0  20   33.14   33.73
   3   0 -20    6.14   26.76
  -3   0  19   -4.43   30.25
   3   0 -19  -11.47   27.25
  -3   0  19  -14.62   32.98
  -3   0  19   -8.70   34.25
   3   0 -19    7.28   28.72
  -3   0  18   26.72   33.32
   3   0 -18   47.02   27.57
  -3   0  18   93.50   34.40
   3   0 -18   69.51   29.65
  -3   0  17  431.04   41.09
   3   0 -17  474.28   37.10
  -3   0  17  711.22   50.45
   3   0 -17  704.92   44.67
  -3   0  16  -17.65   35.53
   3   0 -16  -18.39   24.75
  -3   0  16  -28.63   37.53
   3   0 -16   13.80   30.35
  -3   0  15  758.45   49.85
   3   0 -15  528.68   36.08
  -3   0  15  802.63   49.62
   3   0 -15  682.42   38.51
  -3   0  14 1727.54   99.34
   3   0 -14 1461.89   85.37
  -3   0  14 2159.29  122.16
   3   0 -14 1899.23  100.25
  -3   0  13  426.56   35.93
  -3   0  13  360.86   26.88
   3   0 -13  396.44   27.93
  -3   0  13  466.23   36.13
   3   0 -13  475.94   29.43
  -3   0  12   48.51   33.28
  -3   0  12   11.74   22.39
   3   0 -12   22.98   22.41
  -3   0  12   49.86   28.79
  -3   0  11  397.66   32.15
  -3   0  11  437.40   32.26
   3   0 -11  338.70   23.64
  -3   0  11  419.54   32.77
  -3   0  10    3.46   27.13
  -3   0  10   14.33   24.72
   3   0 -10   -0.09   17.76
  -3   0  10    7.15   28.07
  -3   0   9   12.19   25.84
  -3   0   9   35.35   26.00
   3   0  -9   46.91   20.03
  -3   0   9   54.51   27.16
  -3   0   9   40.99   25.08
  -3   0   8  142.00   24.03
  -3   0   8  195.49   31.79
  -3   0   8  244.15   37.67
  -3   0   8  230.68   27.52
  -3   0   7 1830.51   99.33
  -3   0   6  583.10   46.28
  -3   0   5  361.91   35.78
   3   0  -5  341.00   27.54
  -3   0   4  141.66   38.99
   3   0  -4  100.91   27.30
  -3   0   3  373.68   37.79
   3   0  -3  320.07   31.13
  -3   0   2 2022.26  100.13
   3   0  -2 1834.12   94.50
   3   0  -2 2268.97  139.12
  -3   0   1   37.91   39.45
   3   0  -1   51.01   34.83
   3   0  -1   11.14   42.81
  -3   0   0   51.01   41.29
   3   0   0  -22.85   40.39
  -3   0  -1 6693.85  126.46
   3   0   1 6903.33  175.49
  -3   0  -1 6793.33  121.69
   3   0   1 6511.14  190.87
  -3   0  -2    2.36   45.85
   3   0   2 -138.32   49.99
   3   0   2   13.83   50.79
  -3   0  -314751.49  235.81
   3   0   314233.65  174.28
  -3   0  -315132.31  173.93
  -3   0  -315215.35  288.54
   3   0   314793.19  317.98
  -3   0  -414936.81  240.63
   3   0   415295.89  182.51
  -3   0  -415541.14  203.55
  -3   0  -414465.07  308.19
   3   0   414303.49  292.21
  -3   0  -5  514.99   37.77
  -3   0  -5  621.56   56.32
   3   0   5  545.10   57.77
  -3   0  -5  542.56   55.99
  -3   0  -5  538.24   46.24
   3   0   5  527.94   53.88
  -3   0  -6 2483.06  119.80
  -3   0  -6 2471.58  127.38
   3   0   6 2631.52  126.15
  -3   0  -6 2615.68  132.91
  -3   0  -6 2278.03  146.29
   3   0   6 2485.98  146.47
   3   0   7  120.14   38.09
  -3   0  -7  123.59   31.92
   3   0   7  161.24   54.38
  -3   0  -7  146.18   46.41
  -3   0  -7  122.67   42.09
   3   0   8 1252.45   71.20
  -3   0  -8 1331.06   74.99
   3   0   8 1280.95  130.08
  -3   0  -8 1269.53   74.08
   3   0   9 3401.91  151.35
  -3   0  -9 2918.23  140.88
   3   0   9 3534.88  256.29
   3   0  10  272.16   45.42
  -3   0 -10  227.13   37.61
   3   0  11  528.57   31.00
  -3   0 -11  634.24   42.68
  -3   0 -11  589.49   30.63
   3   0  12   59.43   25.51
  -3   0 -12   51.24   30.60
  -3   0 -12   76.87   22.56
   3   0  13   22.83   23.56
  -3   0 -13   52.59   24.01
  -3   0 -13   41.60   22.28
   3   0  14   51.43   21.48
  -3   0 -14   32.44   25.26
  -3   0 -14   61.33   22.09
  -3   0 -15  260.01   27.49
   3   0  15  166.47   28.26
  -3   0 -15  244.12   24.19
  -3   0 -16    6.17   26.46
  -3   0 -16   96.44   36.39
  -3   0 -16   20.95   20.76
  -3   0 -16   59.63   24.54
  -3   0 -17   -4.50   27.15
  -3   0 -17    0.61   25.68
  -3   0 -18   30.35   28.56
  -3   0 -18   32.70   27.57
  -3   0 -19  320.05   31.26
  -3   0 -19  416.95   30.55
  -3   0 -20   -0.98   30.47
  -3   0 -20    4.31   27.96
  -3   0 -21   52.04   28.44
  -3   0 -21   90.09   28.47
  -3   0 -22   17.93   29.84
  -3   0 -22   18.59   29.75
  -3   0 -22   -9.68   28.53
  -3   0 -23  116.79   29.59
  -3   0 -23  200.80   32.14
  -3   0 -23  149.10   26.02
  -3   0 -24   23.94   28.22
  -3   0 -24    6.87   29.20
   3   0  24  -17.75   36.70
  -3   0 -24   10.04   25.11
  -3   0 -25   -0.05   26.24
  -3   0 -25   12.93   27.42
   3   0  25   24.33   32.95
  -3   0 -25   24.03   24.13
  -3   0 -26    4.86   27.76
  -3   0 -26    1.75   26.05
   3   0  26   14.97   30.01
  -3   0 -26    8.23   21.42
  -3  -1  24   -5.71   25.43
  -3  -1  24  -10.61   26.42
  -3  -1  23    7.87   32.82
  -3  -1  23   24.36   27.88
  -3  -1  23   34.53   28.76
  -3  -1  22   -0.01   30.02
  -3  -1  22  -15.89   27.44
  -3  -1  22   43.70   31.81
  -3  -1  21   -8.98   31.05
  -3  -1  21   39.11   30.10
  -3  -1  20   -8.22   31.32
  -3  -1  20   16.39   29.54
  -3  -1  19   43.23   32.26
  -3  -1  19   59.61   31.95
  -3  -1  18   64.21   34.40
   3   1 -18   35.07   25.82
  -3  -1  18   99.94   33.79
  -3  -1  17  231.97   35.37
   3   1 -17  186.75   27.50
  -3  -1  17  356.19   35.88
  -3  -1  16   18.47   39.20
   3   1 -16  -13.48   25.89
  -3  -1  16  -17.38   35.23
  -3  -1  15   45.31   35.73
   3   1 -15   30.50   25.37
  -3  -1  15   75.20   35.04
  -3  -1  15   53.14   32.41
  -3  -1  14    3.05   37.18
   3   1 -14    7.53   23.68
  -3  -1  14  -28.06   34.39
  -3  -1  14   19.03   30.46
  -3  -1  13 1127.70   47.31
  -3  -1  13 1240.11   50.58
   3   1 -13 1112.16   38.28
  -3  -1  12  266.09   32.50
  -3  -1  12  192.28   23.27
   3   1 -12  152.49   21.66
  -3  -1  12  273.88   29.40
  -3  -1  11   37.92   29.48
  -3  -1  11   62.46   24.70
   3   1 -11   31.31   19.17
  -3  -1  11   15.05   25.47
  -3  -1  11   76.41   26.92
  -3  -1  11   30.34   32.42
  -3  -1  10  667.38   42.47
  -3  -1  10  603.20   43.15
   3   1 -10  499.06   30.98
  -3  -1  10  559.93   39.53
  -3  -1  10  673.60   41.16
  -3  -1  10  758.83   45.09
  -3  -1   9   43.10   24.56
  -3  -1   9   16.22   26.75
  -3  -1   9   16.90   20.75
  -3  -1   9   48.69   23.67
  -3  -1   9   37.02   26.43
  -3  -1   8   76.25   25.73
  -3  -1   8   75.49   27.28
  -3  -1   8   81.54   28.34
  -3  -1   8  141.06   36.21
  -3  -1   8   93.28   34.35
  -3  -1   7  179.87   38.57
  -3  -1   6   74.55   32.88
  -3  -1   5  139.09   35.61
   3   1  -5  152.30   27.14
  -3  -1   4  349.03   35.02
   3   1  -4  286.89   27.52
  -3  -1   3  320.89   37.75
   3   1  -3  267.19   42.57
  -3  -1   2   17.43   35.38
   3   1  -2  -37.65   29.58
  -3  -1   1  315.89   39.26
   3   1  -1  259.09   43.12
  -3  -1   0 8441.53   98.63
   3   1   0 7948.97  129.61
   3   1   0 7825.83  280.48
   3   1   1 -109.45   42.72
  -3  -1  -212410.62  143.28
   3   1   213674.46  404.30
   3   1   3 2599.47  125.08
   3   1   4 8069.51  124.59
   3   1   5 6707.70  116.21
   3   1   6 8408.97  134.26
  -3  -1  -7   13.27   30.04
   3   1   8 5655.70  125.01
  -3  -1  -8 5057.08  223.18
   3   1   8 5890.51  119.46
  -3  -1  -8 5008.13  231.48
   3   1   9  858.03   65.62
  -3  -1  -9  695.58   58.90
  -3  -1  -9  775.88   66.25
   3   1  10 6175.45  121.21
  -3  -1 -10 4965.40  215.51
  -3  -1 -10 4957.25  196.72
  -3  -1 -10 4969.68  208.98
  -3  -1 -10 6185.51  138.41
   3   1  10 5887.91  296.39
  -3  -1 -10 5657.65  127.31
   3   1  11 1607.99   73.18
  -3  -1 -11 1386.75   59.54
  -3  -1 -11 1437.61   69.92
  -3  -1 -11 1615.74   83.02
   3   1  11 1317.00  130.18
  -3  -1 -11 1518.88   66.31
  -3  -1 -11 1644.68   81.51
   3   1  12  241.34   26.82
  -3  -1 -12  205.05   23.24
  -3  -1 -12  248.16   24.73
  -3  -1 -12  272.94   32.17
  -3  -1 -12  244.47   23.02
  -3  -1 -12  263.02   29.99
   3   1  13   36.15   22.05
  -3  -1 -13   30.30   24.45
  -3  -1 -13   43.48   21.81
  -3  -1 -13   19.68   27.16
  -3  -1 -14   39.61   25.98
  -3  -1 -14   62.89   21.08
  -3  -1 -14   54.56   24.75
  -3  -1 -15  113.39   28.49
   3   1  15   51.08   29.83
  -3  -1 -15   86.33   22.73
  -3  -1 -15   82.96   23.97
  -3  -1 -16   50.02   29.85
  -3  -1 -16  128.56   33.37
  -3  -1 -16   65.07   24.66
  -3  -1 -16   27.04   23.09
  -3  -1 -17   24.90   30.66
  -3  -1 -17   31.07   38.30
  -3  -1 -17   18.14   25.56
  -3  -1 -18   11.01   29.38
  -3  -1 -18   -8.36   34.87
  -3  -1 -18   43.30   26.44
  -3  -1 -19   30.35   29.45
  -3  -1 -19   51.55   32.83
  -3  -1 -19   84.07   21.83
  -3  -1 -19   34.87   27.38
  -3  -1 -20   26.16   27.26
  -3  -1 -20   12.26   33.67
  -3  -1 -20   38.15   27.85
  -3  -1 -21  230.46   30.92
  -3  -1 -21  250.52   33.22
  -3  -1 -21  231.46   30.64
  -3  -1 -22   11.16   29.17
  -3  -1 -22   11.98   31.17
  -3  -1 -22   54.85   28.04
  -3  -1 -23   10.94   29.02
  -3  -1 -23   30.61   32.16
  -3  -1 -23   49.52   26.03
  -3  -1 -24    1.74   27.73
  -3  -1 -24    4.64   28.88
  -3  -1 -24    8.84   23.75
  -3  -1 -25   -5.53   25.93
  -3  -1 -25   25.50   26.94
   3   1  25   19.70   32.11
  -3  -1 -25   -0.81   23.07
  -3  -1 -26   33.23   26.48
  -3  -1 -26   30.09   25.71
   3   1  26   42.41   29.01
  -3  -1 -26   28.68   21.23
  -3  -2  23   20.83   34.40
  -3  -2  23   21.99   28.47
   3   2 -23   55.79   29.46
  -3  -2  22   11.73   32.86
  -3  -2  22   23.22   29.21
   3   2 -22   29.36   29.02
  -3  -2  21   12.99   31.35
  -3  -2  21   48.32   28.98
   3   2 -21   44.53   30.13
  -3  -2  20   -4.57   30.53
  -3  -2  20  -20.91   29.87
   3   2 -20  -26.24   28.33
  -3  -2  19    9.27   31.10
  -3  -2  19   30.91   29.23
   3   2 -19   69.59   29.39
  -3  -2  18   11.12   31.73
  -3  -2  18   36.99   31.19
   3   2 -18   -5.99   29.49
  -3  -2  17  369.22   38.93
  -3  -2  17  510.75   41.72
  -3  -2  17  485.11   41.25
   3   2 -17  491.43   38.95
  -3  -2  16 2492.32  125.38
  -3  -2  16 2182.67  112.49
   3   2 -16 2515.05  116.80
  -3  -2  15  146.57   35.40
  -3  -2  15  110.50   30.43
  -3  -2  15  166.19   32.92
   3   2 -15  216.53   33.02
  -3  -2  14  305.68   35.68
  -3  -2  14  424.32   39.38
  -3  -2  14  385.94   32.79
   3   2 -14  328.55   38.73
  -3  -2  13  434.42   39.37
  -3  -2  13  338.35   31.29
  -3  -2  13  515.98   36.18
  -3  -2  13  264.03   29.48
  -3  -2  13  367.39   31.46
   3   2 -13  413.49   32.59
  -3  -2  12  330.12   35.65
  -3  -2  12  279.19   23.07
  -3  -2  12  376.02   33.77
  -3  -2  12  254.24   28.57
  -3  -2  12  274.50   45.91
   3   2 -12  385.52   33.73
  -3  -2  11   42.95   29.80
  -3  -2  11   36.50   22.03
  -3  -2  11   52.69   26.49
  -3  -2  11   66.41   31.31
  -3  -2  10  317.92   24.55
  -3  -2  10  327.46   28.60
  -3  -2  10  310.30   25.45
  -3  -2  10  443.72   32.25
  -3  -2   9  161.75   26.31
  -3  -2   9  151.25   26.39
  -3  -2   9  184.60   24.75
  -3  -2   9  229.09   34.58
  -3  -2   8   -4.09   24.56
  -3  -2   8    9.51   24.42
  -3  -2   8   26.23   25.84
  -3  -2   8    5.72   31.98
  -3  -2   8    7.89   24.29
  -3  -2   8   24.68   21.40
  -3  -2   8   20.88   25.52
  -3  -2   7  -14.90   24.94
  -3  -2   7   15.22   27.33
  -3  -2   7   18.68   29.93
  -3  -2   7  -70.14   25.41
  -3  -2   6  620.09   45.78
   3   2  -6  539.89   44.26
  -3  -2   5 3116.98  138.85
   3   2  -5 2603.12  117.98
   3   2  -5 3082.19  155.91
  -3  -2   4 1592.48   76.44
   3   2  -4 1509.64   65.21
  -3  -2   3 2886.02  116.87
   3   2  -3 2625.32  118.89
   3   2  -3 2986.42  171.02
  -3  -2   2   68.30   35.65
   3   2  -2   58.75   27.11
   3   2  -2   -1.68   34.19
  -3  -2   1   99.94   39.52
   3   2  -1   74.17   27.91
   3   2  -1   47.03   34.70
  -3  -2   0  444.98   41.48
   3   2   0  313.47   35.99
   3   2   0  355.63   42.98
  -3  -2  -116400.32  312.09
   3   2   115483.07  328.49
   3   2   2 1100.46  131.46
   3   2   2 1478.79  102.32
  -3  -2  -2 1563.50  111.30
   3   2   2 1328.12   98.52
   3   2   319902.23  235.61
  -3  -2  -320087.53  365.25
   3   2   319652.96  393.84
   3   2   4  194.05   72.76
  -3  -2  -4  324.83   52.29
   3   2   4  268.73   48.96
   3   2   5 3962.58  168.50
  -3  -2  -5 3542.91  187.19
   3   2   5 3822.29  198.49
   3   2   6 2019.74  108.90
  -3  -2  -6 1998.03  134.44
   3   2   6 2012.83  121.34
   3   2   7 2708.75  140.19
  -3  -2  -7 2500.98  149.73
   3   2   7 2704.75  148.74
   3   2   8 1123.48   89.69
  -3  -2  -8  960.60   63.06
   3   2   9  187.28   39.63
  -3  -2  -9  142.97   27.16
   3   2   9  301.30   48.49
  -3  -2  -9  282.90   36.11
   3   2  10  116.13   29.17
  -3  -2 -10   87.88   22.86
  -3  -2 -10   91.95   23.55
  -3  -2 -10  101.39   25.17
   3   2  10  242.22   44.76
  -3  -2 -10  186.03   33.45
   3   2  11  803.97   54.41
  -3  -2 -11  731.88   46.78
  -3  -2 -11  710.80   54.15
  -3  -2 -11  769.91   58.00
   3   2  11  679.53   61.93
  -3  -2 -11  787.74   52.89
  -3  -2 -11  676.95   54.40
   3   2  12  117.44   24.29
  -3  -2 -12  122.59   23.86
  -3  -2 -12  137.67   25.01
  -3  -2 -12  159.45   28.85
  -3  -2 -12  113.60   20.65
  -3  -2 -12  116.82   25.57
  -3  -2 -13  117.38   25.07
  -3  -2 -13  106.53   24.35
  -3  -2 -13  131.64   21.51
  -3  -2 -13  126.03   24.62
  -3  -2 -14   -6.63   24.20
  -3  -2 -14    0.39   25.50
  -3  -2 -14   33.22   22.77
  -3  -2 -14   35.30   25.62
  -3  -2 -15    3.21   25.56
  -3  -2 -15   13.44   28.02
   3   2  15  -17.00   26.44
  -3  -2 -15   44.83   23.94
  -3  -2 -15   10.57   23.27
  -3  -2 -16    0.49   26.75
  -3  -2 -16   -8.80   28.89
   3   2  16    4.57   28.82
  -3  -2 -16   17.23   25.21
  -3  -2 -16   13.31   24.70
  -3  -2 -17   -8.28   28.45
  -3  -2 -17   14.32   31.86
  -3  -2 -17    7.60   37.76
  -3  -2 -17   42.42   26.41
  -3  -2 -18  -15.14   32.33
  -3  -2 -18   36.27   38.87
  -3  -2 -18   23.10   25.40
  -3  -2 -19    1.09   33.59
  -3  -2 -19  -29.14   38.39
  -3  -2 -19   13.50   28.56
  -3  -2 -20  216.44   33.93
  -3  -2 -20  214.49   39.51
  -3  -2 -20  186.05   29.31
  -3  -2 -21  103.49   35.31
  -3  -2 -21   23.99   22.43
  -3  -2 -21   36.93   27.55
  -3  -2 -22   27.18   30.54
  -3  -2 -22   36.65   26.29
  -3  -2 -23   56.41   30.87
  -3  -2 -23   36.55   26.28
  -3  -2 -24  160.59   29.07
  -3  -2 -24  114.98   30.54
  -3  -2 -24  106.90   23.87
  -3  -2 -25   19.82   25.20
  -3  -2 -25   32.74   27.42
   3   2  25   27.09   27.44
  -3  -2 -25    2.99   20.68
  -3  -2 -26   11.40   24.29
  -3  -2 -26   -3.27   23.81
  -3  -2 -26  -11.10   19.79
  -3  -3  23   12.73   35.38
  -3  -3  23   32.48   27.08
   3   3 -23   16.92   28.73
  -3  -3  22   16.17   36.69
  -3  -3  22   30.08   28.67
   3   3 -22   22.73   27.18
  -3  -3  21   19.65   33.55
  -3  -3  21   -8.81   27.65
   3   3 -21   17.78   28.73
  -3  -3  20  -16.30   34.95
  -3  -3  20   -9.94   29.97
  -3  -3  20   -0.08   27.68
   3   3 -20  -14.53   29.57
  -3  -3  19    6.52   33.69
  -3  -3  19   12.74   30.88
  -3  -3  19   30.84   29.42
   3   3 -19   -3.26   27.53
  -3  -3  18   15.09   32.45
  -3  -3  18  -10.13   29.10
  -3  -3  18    9.51   31.42
   3   3 -18  -33.82   29.02
  -3  -3  17   55.60   32.65
  -3  -3  17   44.07   30.84
  -3  -3  17   42.14   32.56
   3   3 -17   25.98   29.63
  -3  -3  16  441.27   40.24
  -3  -3  16  651.43   44.29
  -3  -3  16  537.32   39.58
   3   3 -16  668.90   43.65
  -3  -3  15  385.14   34.38
  -3  -3  15  517.42   34.04
   3   3 -15  577.98   35.36
  -3  -3  14   22.61   31.64
  -3  -3  14   23.33   30.81
  -3  -3  14  -23.62   25.10
  -3  -3  14   10.67   30.69
   3   3 -14  -34.17   30.22
  -3  -3  13  156.26   30.55
  -3  -3  13   83.60   26.32
  -3  -3  13  143.10   29.77
   3   3 -13  152.67   29.73
  -3  -3  12  432.66   28.83
  -3  -3  12  391.40   33.39
  -3  -3  12  443.01   32.32
  -3  -3  11    0.27   20.99
  -3  -3  11    3.24   27.00
  -3  -3  11    3.83   25.80
   3   3 -11   29.78   30.66
  -3  -3  10   43.78   27.87
  -3  -3  10   47.50   22.00
  -3  -3  10   49.88   26.06
  -3  -3  10   73.75   25.01
   3   3 -10   88.01   31.34
  -3  -3   9   40.46   29.73
  -3  -3   9   59.33   22.97
  -3  -3   9   57.27   26.46
  -3  -3   9   45.42   23.01
  -3  -3   9   50.47   22.68
  -3  -3   8  166.28   29.71
  -3  -3   8  150.20   24.72
  -3  -3   8  193.80   26.31
  -3  -3   8  233.03   35.58
  -3  -3   8  198.63   26.67
  -3  -3   8  190.12   23.39
  -3  -3   8  214.60   24.63
  -3  -3   7   21.75   26.16
  -3  -3   7    9.51   27.71
  -3  -3   7   23.66   25.97
  -3  -3   7   37.92   31.35
  -3  -3   7   31.74   24.90
  -3  -3   7   35.68   23.01
  -3  -3   7   26.18   21.26
  -3  -3   6  233.25   27.04
  -3  -3   6  253.39   32.29
  -3  -3   6  269.07   29.24
  -3  -3   6  301.75   33.68
  -3  -3   6  288.86   28.05
  -3  -3   5  540.54   37.54
   3   3  -5  447.73   47.51
  -3  -3   4 2232.07  114.33
   3   3  -4 2287.66  105.45
   3   3  -4 1790.66  112.03
  -3  -3   3  962.64   44.09
   3   3  -3  866.29   52.15
  -3  -3   2  191.26   44.57
   3   3  -2  238.67   39.04
   3   3  -2  150.59   28.29
  -3  -3   1  142.32   39.49
   3   3  -1  104.26   29.43
   3   3  -1   71.66   28.21
  -3  -3   0 2541.43  144.52
   3   3   0 2861.18  111.49
   3   3   0 2596.99  159.34
  -3  -3  -1  136.52   38.23
   3   3   1  152.82   29.52
   3   3   1  120.63   33.32
   3   3   2   70.06   42.85
   3   3   2  -23.95   29.91
   3   3   3  -75.05   34.09
  -3  -3  -3   -3.33   42.54
   3   3   3   -3.30   31.06
   3   3   4 3937.67  182.53
  -3  -3  -4 3805.67  200.28
   3   3   4 3577.69  200.61
   3   3   5   80.11   54.53
  -3  -3  -5   51.31   41.88
   3   3   5  108.19   29.87
   3   3   6 1307.03   73.89
  -3  -3  -6 1103.02   85.78
   3   3   6  809.80   68.01
   3   3   7 3436.47  167.23
  -3  -3  -7 3301.73  178.89
   3   3   8 7288.50  161.50
  -3  -3  -9  266.03   22.85
  -3  -3  -9  296.32   32.86
   3   3  10  709.51   53.08
  -3  -3 -10  584.55   32.16
  -3  -3 -10  606.71   40.97
  -3  -3 -10  574.31   34.25
   3   3  10  617.15   52.76
  -3  -3 -10  561.02   44.42
  -3  -3 -11    1.75   21.07
  -3  -3 -11    6.72   21.23
  -3  -3 -11   -5.85   23.23
   3   3  11   -1.69   36.24
  -3  -3 -11    1.51   25.60
  -3  -3 -12   -2.82   22.20
  -3  -3 -12   16.23   21.07
  -3  -3 -12    7.45   23.36
   3   3  12    1.62   36.45
  -3  -3 -12    7.99   18.60
  -3  -3 -12   -6.01   23.95
  -3  -3 -13    7.78   22.53
  -3  -3 -13    2.75   22.49
  -3  -3 -13   29.29   19.26
  -3  -3 -13   39.58   22.06
  -3  -3 -14   24.29   24.32
  -3  -3 -14    7.03   23.73
  -3  -3 -14    6.71   20.66
  -3  -3 -14   -0.81   21.45
  -3  -3 -15  237.27   28.95
  -3  -3 -15  264.40   29.54
  -3  -3 -15  208.28   26.46
  -3  -3 -15  228.09   28.36
  -3  -3 -16  166.51   28.49
  -3  -3 -16  148.46   29.57
  -3  -3 -16  144.12   25.29
  -3  -3 -17  363.75   28.75
  -3  -3 -17  421.79   35.40
  -3  -3 -17  441.13   35.42
  -3  -3 -17  362.84   33.85
  -3  -3 -18   74.20   33.11
  -3  -3 -18   52.90   34.30
  -3  -3 -18   54.90   37.00
  -3  -3 -18   56.64   26.13
  -3  -3 -19  301.72   33.03
  -3  -3 -19  370.56   36.39
  -3  -3 -19  280.00   37.02
  -3  -3 -19  236.05   27.74
  -3  -3 -20    9.45   30.32
  -3  -3 -20   73.75   34.48
  -3  -3 -20   50.83   39.17
  -3  -3 -20   37.41   28.38
  -3  -3 -21   22.82   28.49
  -3  -3 -21   53.50   32.67
  -3  -3 -21   27.59   36.51
  -3  -3 -21   22.40   25.22
  -3  -3 -22   15.60   27.51
  -3  -3 -22   59.37   31.70
  -3  -3 -22    6.89   20.72
  -3  -3 -22   22.62   24.23
  -3  -3 -23  143.75   30.05
  -3  -3 -23   61.59   20.46
  -3  -3 -23  118.30   24.47
  -3  -3 -24   37.96   26.31
  -3  -3 -24   26.08   19.99
  -3  -3 -25  -17.62   25.19
  -3  -3 -26  -19.79   23.18
  -3  -4  22   91.39   37.93
  -3  -4  22   82.02   28.33
  -3  -4  22   56.79   25.16
   3   4 -22   63.76   26.63
  -3  -4  21  -12.68   35.87
  -3  -4  21   -2.26   29.79
  -3  -4  21   18.64   25.86
   3   4 -21  -11.75   27.38
  -3  -4  20  -16.70   35.95
  -3  -4  20  -16.18   29.59
  -3  -4  20   17.15   25.08
   3   4 -20  -14.86   26.49
  -3  -4  19  -22.17   32.10
  -3  -4  19  -10.92   30.14
  -3  -4  19    2.97   26.07
   3   4 -19  -27.91   28.33
  -3  -4  18   34.38   32.04
  -3  -4  18   19.68   28.67
  -3  -4  18   57.60   30.34
   3   4 -18   39.92   29.62
  -3  -4  17   37.37   30.81
  -3  -4  17    0.03   32.82
  -3  -4  17   23.18   29.55
   3   4 -17   37.09   29.56
  -3  -4  16   50.62   30.34
  -3  -4  16   15.69   22.29
  -3  -4  16   52.08   32.31
   3   4 -16   45.78   30.45
  -3  -4  15   -3.13   30.36
  -3  -4  15   18.68   24.50
  -3  -4  15   35.54   30.19
   3   4 -15   11.69   30.66
  -3  -4  14  110.74   30.45
  -3  -4  14   16.33   26.10
  -3  -4  14   87.06   29.20
   3   4 -14   56.44   27.86
  -3  -4  13  -52.94   30.31
  -3  -4  13   10.73   26.24
  -3  -4  13  -19.54   26.81
  -3  -4  13   -2.24   28.49
   3   4 -13  -18.51   29.12
  -3  -4  12  150.65   30.79
  -3  -4  12  258.11   29.98
  -3  -4  12  156.04   38.80
  -3  -4  12  195.02   28.26
   3   4 -12  224.91   29.69
  -3  -4  11  106.93   29.57
  -3  -4  11  105.90   22.40
  -3  -4  11  146.83   28.12
  -3  -4  11  200.74   30.39
   3   4 -11  187.11   28.86
  -3  -4  10   60.76   28.41
  -3  -4  10   46.58   21.36
  -3  -4  10   53.25   27.47
  -3  -4  10   46.97   25.61
   3   4 -10   26.86   25.94
  -3  -4   9   14.49   27.47
  -3  -4   9   38.71   24.26
   3   4  -9   51.76   25.01
  -3  -4   8  208.83   28.39
  -3  -4   8  179.13   24.35
  -3  -4   8  224.24   31.74
  -3  -4   8  260.48   29.91
  -3  -4   8  180.40   24.73
   3   4  -8  210.17   24.47
  -3  -4   7 2031.17   83.55
  -3  -4   7 1907.43   92.88
  -3  -4   7 2226.40  100.13
  -3  -4   7 2413.43   96.88
  -3  -4   7 1982.36   94.39
   3   4  -7 1983.94   84.12
  -3  -4   6  918.57   61.11
  -3  -4   6  914.31   66.63
  -3  -4   6  961.97   67.71
  -3  -4   6 1055.54   72.81
  -3  -4   6 1076.35   69.17
  -3  -4   6  784.15   65.24
  -3  -4   5  105.31   27.19
  -3  -4   5   77.59   31.67
  -3  -4   5  143.74   28.87
  -3  -4   5   80.02   30.08
  -3  -4   4   57.73   32.93
  -3  -4   4  100.91   28.00
  -3  -4   3  671.16   62.81
   3   4  -3  630.03   41.78
  -3  -4   3  703.63   47.73
  -3  -4   2  199.86   41.79
   3   4  -2  182.65   33.97
  -3  -4   1   51.98   35.26
   3   4  -1   50.38   26.91
   3   4  -1  -41.18   22.93
  -3  -4   0   90.87   35.60
   3   4   0  -45.16   28.42
   3   4   0 -110.82   30.70
   3   4   1  371.14   37.42
   3   4   1  252.10   64.51
   3   4   1  213.08   48.39
   3   4   2 1481.62  126.78
   3   4   2 1548.83  130.32
   3   4   3  540.23   62.32
   3   4   3  479.12   62.53
   3   4   3  339.73   64.12
   3   4   4 -108.41   37.22
   3   4   4  -67.18   30.14
   3   4   5  328.72   42.44
  -3  -4  -5  464.74   50.98
   3   4   5  447.66   42.46
   3   4   6 2743.12  174.51
   3   4   6 2234.75  127.13
  -3  -4  -6 2201.64  138.28
  -3  -4  -7  551.43   38.98
   3   4   7  608.91   49.34
  -3  -4  -7  617.39   49.53
  -3  -4  -8   64.66   21.26
   3   4   8   26.90   44.51
  -3  -4  -8   -3.56   31.65
  -3  -4  -9  342.43   24.07
  -3  -4  -9  338.93   31.08
  -3  -4  -9  382.40   29.72
   3   4   9  464.94   48.67
  -3  -4  -9  411.59   42.86
  -3  -4 -10   90.14   20.14
  -3  -4 -10   76.04   20.78
  -3  -4 -10  105.74   22.58
   3   4  10  104.53   40.16
  -3  -4 -10   93.40   24.49
  -3  -4 -11   25.42   20.83
  -3  -4 -11   26.34   20.54
  -3  -4 -11   23.86   21.12
   3   4  11   46.71   40.96
  -3  -4 -11   21.15   22.19
  -3  -4 -12   27.53   20.96
  -3  -4 -12   16.73   20.96
  -3  -4 -12   10.83   24.68
   3   4  12   44.01   35.81
  -3  -4 -12   27.68   22.12
  -3  -4 -13   48.60   23.26
  -3  -4 -13   26.92   22.62
  -3  -4 -13   23.29   24.48
  -3  -4 -13   21.09   21.09
  -3  -4 -14   81.29   24.76
  -3  -4 -14   65.62   24.79
  -3  -4 -14   71.64   21.29
  -3  -4 -15  180.80   27.05
  -3  -4 -15  162.34   26.85
  -3  -4 -15  110.24   22.73
  -3  -4 -16  165.19   28.89
  -3  -4 -16  148.44   28.85
  -3  -4 -17  -14.76   29.39
  -3  -4 -17    1.03   29.43
  -3  -4 -17   23.26   33.69
  -3  -4 -18  434.06   37.71
  -3  -4 -18  366.59   37.61
  -3  -4 -18  549.45   45.29
  -3  -4 -19   14.51   30.70
  -3  -4 -19  -22.91   31.17
  -3  -4 -19   -7.77   41.41
  -3  -4 -20  373.38   35.73
  -3  -4 -20  394.75   42.68
  -3  -4 -20  490.45   45.87
  -3  -4 -21   11.46   28.44
  -3  -4 -21   32.90   29.10
  -3  -4 -21   20.69   36.45
  -3  -4 -22    3.93   28.42
  -3  -4 -22    2.22   26.91
  -3  -4 -22  -25.49   37.15
  -3  -4 -23  -12.11   25.25
  -3  -4 -23  -13.58   26.76
  -3  -4 -23   14.82   21.15
  -3  -4 -24   12.97   25.55
  -3  -4 -24   -2.73   24.89
  -3  -4 -24   -2.92   19.55
  -3  -4 -25   10.87   25.06
  -3  -4 -25   26.60   23.00
  -3  -5  22    0.88   37.68
  -3  -5  22    6.55   25.81
  -3  -5  22   13.69   26.48
   3   5 -22    7.78   22.24
  -3  -5  21   19.57   36.29
  -3  -5  21    5.58   28.27
  -3  -5  21   -1.80   26.52
   3   5 -21  -14.94   23.71
  -3  -5  20   28.21   36.38
  -3  -5  20   -9.81   28.35
  -3  -5  20    5.53   24.16
  -3  -5  20   30.84   25.32
   3   5 -20   -3.45   24.67
  -3  -5  19   28.35   30.38
  -3  -5  19   15.18   26.30
   3   5 -19    8.26   25.72
  -3  -5  18   34.40   31.57
  -3  -5  18   32.67   26.78
   3   5 -18  -26.54   27.22
  -3  -5  17   18.68   30.69
  -3  -5  17   14.96   24.01
  -3  -5  17   12.80   27.12
   3   5 -17   12.85   27.07
  -3  -5  16    1.09   32.49
  -3  -5  16   17.09   24.02
  -3  -5  16   34.87   28.21
   3   5 -16  -15.05   26.96
  -3  -5  15   56.55   30.31
  -3  -5  15   23.03   31.02
  -3  -5  15    1.29   23.14
  -3  -5  15   31.15   26.33
   3   5 -15   37.97   27.35
  -3  -5  14   38.32   30.64
  -3  -5  14   37.39   30.44
  -3  -5  14   45.19   26.09
  -3  -5  14   48.50   27.41
   3   5 -14   22.04   27.24
  -3  -5  13   11.69   29.94
  -3  -5  13   35.65   30.97
  -3  -5  13    1.31   27.87
  -3  -5  13   36.77   26.94
   3   5 -13   26.07   26.80
  -3  -5  12    2.55   29.55
  -3  -5  12   65.77   30.88
  -3  -5  12   -2.33   29.36
  -3  -5  12   16.15   25.98
   3   5 -12   -1.70   25.72
  -3  -5  11   67.49   28.87
  -3  -5  11   35.02   27.67
  -3  -5  11   34.40   26.18
   3   5 -11   -6.07   25.11
  -3  -5  10   -6.69   29.93
  -3  -5  10   -1.64   19.85
  -3  -5  10   -9.32   27.34
  -3  -5  10    7.04   24.91
   3   5 -10  -24.10   23.86
  -3  -5   9    0.56   26.95
  -3  -5   9  -11.97   20.54
  -3  -5   9   -9.66   25.53
  -3  -5   9  -34.07   24.11
   3   5  -9  -32.09   23.63
  -3  -5   8   49.93   25.87
  -3  -5   8   28.54   24.13
  -3  -5   8   61.54   28.40
  -3  -5   8   70.76   25.16
  -3  -5   7   30.08   25.08
  -3  -5   7   30.81   22.70
  -3  -5   7   53.15   29.57
  -3  -5   7  119.47   29.38
  -3  -5   7   29.81   22.12
  -3  -5   6  752.23   45.29
  -3  -5   6  849.90   57.94
  -3  -5   6 1007.05   65.00
  -3  -5   6  816.39   51.08
  -3  -5   6  700.72   50.74
  -3  -5   5  697.64   39.70
  -3  -5   5  812.56   59.23
  -3  -5   5  956.66   57.30
  -3  -5   5  678.88   49.28
  -3  -5   4   17.73   21.92
  -3  -5   4   27.09   27.49
  -3  -5   4   28.96   29.72
  -3  -5   4   23.05   24.29
  -3  -5   4   46.50   28.54
  -3  -5   4   13.08   19.52
  -3  -5   3  240.68   38.29
  -3  -5   3  268.50   33.22
  -3  -5   3  225.21   30.01
  -3  -5   3  350.27   29.96
  -3  -5   2    1.36   29.16
  -3  -5   2   13.29   29.44
  -3  -5   2   41.45   25.66
   3   5  -1   -3.66   35.88
  -3  -5   1   -8.41   33.28
   3   5   0  295.42   51.64
  -3  -5   0  421.71   54.81
  -3  -5   0  487.89   36.66
   3   5   1   46.68   34.96
  -3  -5  -1   63.00   28.42
   3   5   2  153.90   36.68
   3   5   3   62.62   30.63
   3   5   4 1014.57   94.42
   3   5   5 6796.60  161.26
   3   5   6 4656.98  174.43
  -3  -5  -6 3403.26  167.19
  -3  -5  -7   60.53   23.29
  -3  -5  -7   74.67   22.22
  -3  -5  -7   50.38   27.90
  -3  -5  -8   15.59   22.40
   3   5   8  -13.95   40.79
  -3  -5  -8   16.87   24.87
  -3  -5  -9   20.95   20.82
   3   5   9   22.98   44.10
  -3  -5  -9   24.34   24.25
  -3  -5 -10  129.78   21.19
  -3  -5 -10  155.67   27.93
  -3  -5 -10  175.72   22.24
   3   5  10  219.77   44.52
  -3  -5 -10  136.96   22.62
  -3  -5 -11   50.44   21.37
  -3  -5 -11   41.12   19.58
  -3  -5 -11   71.98   22.58
   3   5  11   93.51   39.55
  -3  -5 -11   47.50   20.51
  -3  -5 -12   -3.76   22.90
  -3  -5 -12   -0.41   19.92
  -3  -5 -12  -20.40   22.86
   3   5  12   23.33   36.69
  -3  -5 -12   -7.85   19.22
  -3  -5 -13   88.48   25.55
  -3  -5 -13   80.09   21.53
  -3  -5 -13  101.27   22.29
   3   5  13   96.81   35.07
  -3  -5 -14   42.19   25.08
  -3  -5 -14   62.36   23.87
  -3  -5 -15   22.98   29.11
  -3  -5 -15    1.78   23.44
  -3  -5 -16   33.82   30.62
  -3  -5 -16   15.50   24.52
  -3  -5 -17  455.36   37.43
  -3  -5 -17  380.28   41.67
  -3  -5 -18  360.93   35.66
  -3  -5 -18  279.59   35.58
  -3  -5 -18  408.51   40.15
  -3  -5 -19  348.76   37.65
  -3  -5 -19  299.89   38.45
  -3  -5 -19  333.33   40.04
  -3  -5 -20  -26.32   30.36
  -3  -5 -20    8.19   27.16
  -3  -5 -20    4.67   37.52
  -3  -5 -21  101.89   29.78
  -3  -5 -21  140.31   28.28
  -3  -5 -21  113.28   36.15
  -3  -5 -22   30.80   27.59
  -3  -5 -22   10.80   35.71
  -3  -5 -23    2.40   25.91
  -3  -5 -23  -33.81   33.85
  -3  -5 -23  -10.01   19.68
  -3  -5 -24   22.39   25.09
  -3  -5 -24   -5.23   19.38
  -3  -5 -25    4.66   24.51
  -3  -6  21   -6.49   25.18
  -3  -6  21   -6.19   25.99
  -3  -6  20    5.61   27.90
  -3  -6  20    6.92   27.07
  -3  -6  19    0.36   28.45
  -3  -6  19    5.82   27.19
  -3  -6  18   35.14   33.24
  -3  -6  18   -4.46   30.76
  -3  -6  18  -10.84   26.92
  -3  -6  18   -7.93   25.37
   3   6 -18   -6.05   22.56
  -3  -6  17   37.12   32.40
  -3  -6  17   58.06   29.82
  -3  -6  17   14.31   24.74
  -3  -6  17   59.84   24.23
   3   6 -17   27.69   24.52
  -3  -6  16  114.83   33.16
  -3  -6  16  214.97   31.96
[truncated: 572,521 more chars]
